# Supplementary material for: The Novel Non-coding Transcriptional Regulator Gm18840 Drives Cardiomyocyte Apoptosis in Myocardial Infarction Post Ischemia/Reperfusion
Source: Front Cell Dev Biol. 2021 Jul 12;9:615950. doi: 10.3389/fcell.2021.615950 (PMC8312575; doi:10.3389/fcell.2021.615950)
Supplement: Supplementary file 5 [file Table_5.XLSX]

## Sheet: Table S3
Table S5. Genome-wide binding sites of Gm18840
PeakID (cmd=annotatePeaks.pl Gm18840-high-confident.bed mm10)	Chr	Start	End	Strand	Peak Score	Annotation	Detailed Annotation	Distance to TSS	Nearest PromoterID	Entrez ID	Nearest Unigene	Nearest Refseq	Nearest Ensembl	Gene Name	Gene Alias	Gene Description	Gene Type
8825	chrX	170824947	170833770	+	8173	Intergenic	Intergenic	156714	NM_001199212	107626	Mm.486144	NM_001199212	ENSMUSG00000093806	Asmt	Hiomt	acetylserotonin O-methyltransferase	protein-coding
15312	chrX	170730713	170746023	+	5588	Intergenic	Intergenic	65724	NM_001199212	107626	Mm.486144	NM_001199212	ENSMUSG00000093806	Asmt	Hiomt	acetylserotonin O-methyltransferase	protein-coding
28928	chrX	170839850	170868776	+	5198	Intergenic	Intergenic	181669	NM_001199212	107626	Mm.486144	NM_001199212	ENSMUSG00000093806	Asmt	Hiomt	acetylserotonin O-methyltransferase	protein-coding
6281	chrX	170814749	170821028	+	4462	Intergenic	Intergenic	145244	NM_001199212	107626	Mm.486144	NM_001199212	ENSMUSG00000093806	Asmt	Hiomt	acetylserotonin O-methyltransferase	protein-coding
3464	chr7	141505699	141509161	+	2774	intron (NM_026522, intron 8 of 10)	intron (NM_026522, intron 8 of 10)	31050	NM_001252588	64540	Mm.489619	NM_053082	ENSMUSG00000025511	Tspan4	AI325509|AI746565|D130042I01Rik|NAG-2|Tm4sf7|Tspan-4	tetraspanin 4	protein-coding
3296	chr4	125114092	125117386	+	2686	Intergenic	Intergenic	12142	NM_153159	230738	Mm.402	NM_153159	ENSMUSG00000042677	Zc3h12a	BC036563|MCPIP|MCPIP-1|Mcpip1|Reg1	zinc finger CCCH type containing 12A	protein-coding
3361	chr15	77802522	77805881	+	2633	intron (NM_022410, intron 3 of 40)	intron (NM_022410, intron 3 of 40)	37974	NM_022410	17886	Mm.29677	NM_022410	ENSMUSG00000022443	Myh9	Fltn|Myhn-1|Myhn1|NMHCIIA|NMMHC-A|NMMHC-IIA|TU72.6	myosin, heavy polypeptide 9, non-muscle	protein-coding
3547	chr17	13550246	13553791	+	2618	intron (NR_045436, intron 1 of 4)	(CTGTG)n|Simple_repeat|Simple_repeat	2076	NR_045436	72578	Mm.46549	NR_045436	ENSMUSG00000117042	2700054A10Rik	-	RIKEN cDNA 2700054A10 gene	ncRNA
2810	chr11	117912353	117915161	+	2488	Intergenic	Intergenic	-40231	NM_027919	71776	Mm.3200	NM_027919	ENSMUSG00000017713	Tha1	1300017K07Rik|GLY1	threonine aldolase 1	protein-coding
3518	chr10	81180500	81184016	+	2415	promoter-TSS (NM_001190474)	promoter-TSS (NM_001190474)	-749	NM_001190474	13144	Mm.10294	NM_007828	ENSMUSG00000034974	Dapk3	ZIPK|dlk	death-associated protein kinase 3	protein-coding
2966	chr8	13917391	13920355	+	2389	intron (NM_001359061, intron 2 of 10)	(CAGTG)n|Simple_repeat|Simple_repeat	11134	NM_001359061	66822	Mm.37950	NM_025785	ENSMUSG00000038365	Fbxo25	9130015I06Rik|AI649137|Fbx25	F-box protein 25	protein-coding
3582	chr1	186729767	186733347	+	2373	intron (NM_026041, intron 4 of 4)	intron (NM_026041, intron 4 of 4)	17801	NM_026041	67223	Mm.289841	NM_026041	ENSMUSG00000001305	Rrp15	2810430M08Rik|5430437H21Rik	ribosomal RNA processing 15 homolog (S. cerevisiae)	protein-coding
3036	chr7	112636642	112639676	+	2306	Intergenic	Intergenic	-41197	NM_001166584	21676	Mm.24685	NM_009346	ENSMUSG00000055320	Tead1	2610024B07Rik|B230114H05Rik|Gtrgeo5|TEAD-1|TEF-1|Tcf13|mTEF-1	TEA domain family member 1	protein-coding
2937	chr2	173098309	173101244	+	2283	intron (NM_001081387, intron 9 of 10)	(TCTG)n|Simple_repeat|Simple_repeat	19749	NM_001081387	664799	Mm.389396	NM_001081387	ENSMUSG00000070495	Ctcfl	Boris	CCCTC-binding factor (zinc finger protein)-like	protein-coding
3054	chr13	74528335	74531387	+	2193	Intergenic	(CACAG)n|Simple_repeat|Simple_repeat	-35911	NM_146231	235956		NM_146231	ENSMUSG00000069208	Zfp825	-	zinc finger protein 825	protein-coding
2708	chr13	91173082	91175788	+	2095	intron (NM_025770, intron 2 of 7)	intron (NM_025770, intron 2 of 7)	49552	NM_025770	66795	Mm.235385	NM_025770	ENSMUSG00000021619	Atg10	5330424L23Rik|5430428K15Rik|AI852123|APG10|Agp10|Apg10l|Apg10p|Atg10l	autophagy related 10	protein-coding
2898	chr10	86611957	86614853	+	2084	Intergenic	Intergenic	-72122	NR_015572	66263	Mm.392261	NR_015572	ENSMUSG00000097412	1810014B01Rik	-	RIKEN cDNA 1810014B01 gene	pseudo
2934	chr17	71437430	71440362	+	2079	intron (NM_028887, intron 10 of 47)	intron (NM_028887, intron 10 of 47)	36447	NM_028887	74355	Mm.194450	NM_028887	ENSMUSG00000024054	Smchd1	4931400A14Rik|AW554188|MommeD1|mKIAA0650	SMC hinge domain containing 1	protein-coding
3023	chr15	27970438	27973459	+	2020	intron (NM_001081302, intron 1 of 56)	intron (NM_001081302, intron 1 of 56)	53900	NM_001081302	223435	Mm.485422	NM_001081302	ENSMUSG00000022263	Trio	6720464I07Rik|AA408740|Solo	triple functional domain (PTPRF interacting)	protein-coding
2750	chr18	24145844	24148592	+	1944	Intergenic	Intergenic	-25399	NM_172625	225280	Mm.258973	NM_172625	ENSMUSG00000047989	Ino80c	D030070L09Rik	INO80 complex subunit C	protein-coding
2328	chr2	118302989	118305315	+	1897	promoter-TSS (NR_045919)	promoter-TSS (NR_045919)	-762	NR_045919	73358	Mm.437192	NR_045919	ENSMUSG00000085889	1700054M17Rik	-	RIKEN cDNA 1700054M17 gene	ncRNA
3503	chr15	80024353	80027854	+	1839	Intergenic	L2a|LINE|L2	-11126	NM_011057	18591	Mm.144089	NM_011057	ENSMUSG00000000489	Pdgfb	PDGF-2|PDGF-B|Sis|c-sis	platelet derived growth factor, B polypeptide	protein-coding
2928	chr3	58251347	58254273	+	1839	Intergenic	(CTGTG)n|Simple_repeat|Simple_repeat	-89003	NR_040538	67850	Mm.416968	NR_040538	ENSMUSG00000100666	1700007F19Rik	-	RIKEN cDNA 1700007F19 gene	ncRNA
2563	chr12	112604917	112607478	+	1838	intron (NM_198411, intron 10 of 22)	intron (NM_198411, intron 10 of 22)	-13850	NM_007421	11565	Mm.3440	NM_007421	ENSMUSG00000011148	Adssl1	AI528595|Adss|Adss1	adenylosuccinate synthetase like 1	protein-coding
2434	chr15	83156810	83159242	+	1836	intron (NM_029787, intron 8 of 8)	intron (NM_029787, intron 8 of 8)	8381	NR_004432	104307	Mm.471434	NR_004432	ENSMUSG00000065176	Rnu12	-	RNA U12, small nuclear	snRNA
2472	chr15	76456296	76458766	+	1779	promoter-TSS (NM_198885)	promoter-TSS (NM_198885)	93	NM_198885	20289	Mm.322821	NM_198885	ENSMUSG00000034161	Scx	BB114693|Bhlha41|Scl	scleraxis	protein-coding
2383	chr15	85545444	85547825	+	1707	intron (NM_001163633, intron 2 of 3)	intron (NM_001163633, intron 2 of 3)	31436	NM_001163634	22422	Mm.306946	NM_009528	ENSMUSG00000022382	Wnt7b	Wnt-7b	wingless-type MMTV integration site family, member 7B	protein-coding
2337	chr3	63963201	63965536	+	1579	5' UTR (NM_001272035, exon 1 of 7)	5' UTR (NM_001272035, exon 1 of 7)	365	NM_001272035	11416	Mm.135619	NM_015728	ENSMUSG00000027822	Slc33a1	AI315656|AI788741|Acatn|D630022N01Rik	solute carrier family 33 (acetyl-CoA transporter), member 1	protein-coding
2045-02-01	chr3	96238807	96240850	+	1568	promoter-TSS (NM_054045)	promoter-TSS (NM_054045)	506	NM_013549	15267	Mm.5220	NM_013549	ENSMUSG00000064220	Hist2h2aa1	AI448581|H2a-614|H2a-615|Hist2	histone cluster 2, H2aa1	protein-coding
1889	chr11	119988592	119990479	+	1565	intron (NM_001037754, intron 6 of 13)	intron (NM_001037754, intron 6 of 13)	-25232	NR_037225	100526518		NR_037225	ENSMUSG00000105524	Mir3065	mir-3065|mmu-mir-3065	microRNA 3065	ncRNA
2146	chr15	38708812	38710956	+	1538	Intergenic	Intergenic	18632	NR_131206	105463124	Mm.432448	NR_131206	ENSMUSG00000115620	Gm45924	Borg	predicted gene, 45924	ncRNA
2242	chr4	3238373	3240613	+	1518	Intergenic	Intergenic	-54188	NM_001167535	100312471	Mm.377218	NM_001167535	ENSMUSG00000115466	Vmn1r3	Gm11778	vomeronasal 1 receptor 3	protein-coding
2649	chr3	157440633	157443280	+	1470	Intergenic	(CACAC)n|Simple_repeat|Simple_repeat	92134	NR_152231	381498	Mm.402095	NR_152231	ENSMUSG00000105834	4930592C13Rik	Gm1657|Gm43159	RIKEN cDNA 4930592C13 gene	ncRNA
2167	chr15	88974487	88976652	+	1466	intron (NM_001364855, intron 3 of 11)	intron (NM_001364855, intron 3 of 11)	2984	NM_133241	170790	Mm.32780	NM_133241	ENSMUSG00000035805	Mlc1	AW048630|BB074274|Kiaa0027-hp|LVM|MLC|VL|WKL1	megalencephalic leukoencephalopathy with subcortical cysts 1 homolog (human)	protein-coding
2134	chr5	107766396	107768528	+	1453	intron (NM_007964, intron 16 of 17)	(CAG)n|Simple_repeat|Simple_repeat	-41657	NM_001267621	14581	Mm.2078	NM_010278	ENSMUSG00000029275	Gfi1	AW495828|Gfi-1|Pal-1|Pal1	growth factor independent 1 transcription repressor	protein-coding
2105	chr15	99343770	99345873	+	1449	intron (NM_001310623, intron 1 of 24)	intron (NM_001310623, intron 1 of 24)	25661	NM_001310623	22379	Mm.29043	NM_011711	ENSMUSG00000023008	Fmnl3	2700073B04Rik|FBP11|Wbp3|mKIAA2014	formin-like 3	protein-coding
2137	chr15	59002386	59004521	+	1436	intron (NM_001146180, intron 3 of 13)	intron (NM_001146180, intron 3 of 13)	69652	NM_023172	66218	Mm.322294	NM_023172	ENSMUSG00000022354	Ndufb9	1190008J14Rik|CI-B22	NADH:ubiquinone oxidoreductase subunit B9	protein-coding
1956	chr17	69297747	69299701	+	1434	Intergenic	Intergenic	-21518	NR_045428	69750	Mm.439063	NR_045428	ENSMUSG00000100572	2410021H03Rik	-	RIKEN cDNA 2410021H03 gene	ncRNA
2051	chr15	89474093	89476142	+	1429	intron (NM_009713, intron 3 of 8)	intron (NM_009713, intron 3 of 8)	-1135	NR_077233	100532730	Mm.461541	NR_077233		C230037L18Rik	-	RIKEN cDNA C230037L18 gene	ncRNA
2087	chr10	75835989	75838074	+	1426	Intergenic	Lx10|LINE|L1	-2150	NM_010361	14872	Mm.24118	NM_010361	ENSMUSG00000033318	Gstt2	AI266894|Yrs|mGSTT2	glutathione S-transferase, theta 2	protein-coding
3030	chrX	169995527	169998555	+	1409	Intergenic	CpG	-18124	NR_029457	654820	Mm.34441	NM_001039559	ENSMUSG00000072844	G530011O06Rik	-	RIKEN cDNA G530011O06 gene	ncRNA
1701	chr19	10100352	10102051	+	1408	intron (NM_019699, intron 1 of 11)	intron (NM_019699, intron 1 of 11)	302	NM_019699	56473	Mm.38901	NM_019699	ENSMUSG00000024665	Fads2	2900042M13Rik|Fadsd2	fatty acid desaturase 2	protein-coding
2494	chr19	56615951	56618443	+	1392	Intergenic	(TTG)n|Simple_repeat|Simple_repeat	68936	NM_025811	66866	Mm.46346	NM_025811	ENSMUSG00000025078	Nhlrc2	1200003G01Rik|AI835049|AV002846|AW496455	NHL repeat containing 2	protein-coding
1882	chr1	188200969	188202849	+	1390	intron (NM_001357536, intron 7 of 7)	intron (NM_001357536, intron 7 of 7)	-60929	NM_021408	22283	Mm.331238	NM_021408	ENSMUSG00000026609	Ush2a	A930011D15Rik|A930037M10Rik|Gm676|Gm983|Mush2a|Ushrn	usherin	protein-coding
1642	chr6	47771619	47773259	+	1387	Intergenic	CpG	-19514	NR_002841	19799		NR_002841		Rn4.5s	-	4.5S RNA	rRNA
2096	chr15	83309578	83311672	+	1386	intron (NM_001357756, intron 11 of 15)	intron (NM_001357756, intron 11 of 15)	31233	NR_162786	114483639		NR_162786		Mir12186	mmu-mir-12186	microRNA mir-12186	ncRNA
2003	chr9	54801205	54803206	+	1371	Intergenic	Intergenic	37457	NM_001284507	12903	Mm.34797	NM_013496	ENSMUSG00000032291	Crabp1	AI326249|CRABP-I|Crabp-1|CrabpI|Rbp-5	cellular retinoic acid binding protein I	protein-coding
1761	chr10	17722676	17724435	+	1365	intron (NM_010828, intron 1 of 1)	CpG	327	NM_010828	17684	Mm.272321	NM_010828	ENSMUSG00000039910	Cited2	AI835299|ER154-like|Mrg1|Msg2|p35srj	Cbp/p300-interacting transactivator, with Glu/Asp-rich carboxy-terminal domain, 2	protein-coding
1945	chr2	104149781	104151724	+	1355	intron (NM_001368844, intron 20 of 20)	intron (NM_001368844, intron 20 of 20)	27983	NM_026634	68243	Mm.158191	NM_026634	ENSMUSG00000032671	A930018P22Rik	-	RIKEN cDNA A930018P22 gene	protein-coding
1989	chr6	83135564	83137551	+	1350	promoter-TSS (NM_133641)	promoter-TSS (NM_133641)	-527	NM_009106	20166	Mm.4139	NM_009106	ENSMUSG00000034930	Rtkn	-	rhotekin	protein-coding
1699-2	chr19	5848113	5849810	+	1328	Intergenic	Intergenic	-3481	NR_003513	66961	Mm.281895	NR_003513	ENSMUSG00000092274	Neat1	2310043N10Rik|VINC	nuclear paraspeckle assembly transcript 1 (non-protein coding)	ncRNA
2248	chr10	121572223	121574469	+	1323	intron (NM_019786, intron 4 of 20)	intron (NM_019786, intron 4 of 20)	13448	NM_019786	56480	Mm.34580	NM_019786	ENSMUSG00000020115	Tbk1	1200008B05Rik|AI462036|AW048562	TANK-binding kinase 1	protein-coding
2193	chr17	35968599	35970790	+	1322	promoter-TSS (NM_013854)	promoter-TSS (NM_013854)	56	NM_013854	224742	Mm.329022	NM_013854	ENSMUSG00000038762	Abcf1	AU041969|Abc50|D17Wsu166e|GCN20	ATP-binding cassette, sub-family F (GCN20), member 1	protein-coding
2045	chr17	31934386	31936429	+	1309	Intergenic	Intergenic	-79603	NM_010831	17691	Mm.290941	NM_010831	ENSMUSG00000024042	Sik1	Hrt-20|Msk|Sik|Sik-1|Snf1lk	salt inducible kinase 1	protein-coding
1639-2	chr8	109622974	109624611	+	1301	exon (NM_181544, exon 5 of 32)	exon (NM_181544, exon 5 of 32)	9558	NM_181544	244646	Mm.436810	NM_181544	ENSMUSG00000048827	Pkd1l3	-	polycystic kidney disease 1 like 3	protein-coding
1802	chr11	87447803	87449603	+	1290	intron (NM_031386, intron 2 of 30)	U3|snRNA|snRNA	21112	NM_001199293	83560	Mm.440758	NM_031386	ENSMUSG00000010342	Tex14	C85585	testis expressed gene 14	protein-coding
1542-2	chr8	125536931	125538471	+	1284	intron (NM_001357372, intron 1 of 21)	(TGG)n|Simple_repeat|Simple_repeat	32162	NM_001357372	244668	Mm.271668	NM_001081337	ENSMUSG00000001995	Sipa1l2	BC058408|mKIAA1389	signal-induced proliferation-associated 1 like 2	protein-coding
2312	chr2	171862699	171865009	+	1281	Intergenic	Intergenic	98945	NR_040509	75655	Mm.396203	NR_040509	ENSMUSG00000086823	1700028P15Rik	-	RIKEN cDNA 1700028P15 gene	ncRNA
3129	chr1	33599255	33602382	+	1279	intron (NM_008922, intron 7 of 13)	intron (NM_008922, intron 7 of 13)	68976	NM_008922	19076	Mm.27705	NM_008922	ENSMUSG00000026134	Prim2	AI323589	DNA primase, p58 subunit	protein-coding
1766	chr5	28098027	28099791	+	1277	Intergenic	(CAGAGA)n|Simple_repeat|Simple_repeat	27497	NM_153526	231070	Mm.30221	NM_153526	ENSMUSG00000045294	Insig1	1810013C12Rik|Insig-1	insulin induced gene 1	protein-coding
1898	chr5	108628536	108630432	+	1269	promoter-TSS (NM_001163531)	promoter-TSS (NM_001163531)	293	NM_001359924	231580	Mm.276647	NM_153569	ENSMUSG00000062234	Gak	D130045N16Rik	cyclin G associated kinase	protein-coding
2321	chr15	78925377	78927696	+	1262	promoter-TSS (NM_008495)	promoter-TSS (NM_008495)	-189	NM_008495	16852	Mm.43831	NM_008495	ENSMUSG00000068220	Lgals1	AA410090|Gal-1|Galbp|L-14.5|L14|Lect14|galectin-1	lectin, galactose binding, soluble 1	protein-coding
1652	chr3	88490090	88491740	+	1262	intron (NM_001002011, intron 1 of 11)	intron (NM_001002011, intron 1 of 11)	2397	NM_019390	16905	Mm.243014	NM_019390	ENSMUSG00000028063	Lmna	Dhe	lamin A	protein-coding
1873	chr11	95125290	95127161	+	1259	TTS (NM_010055)	TTS (NM_010055)	6108	NM_010055	13393	Mm.5194	NM_010055	ENSMUSG00000001510	Dlx3	AV237891|Dlx-3	distal-less homeobox 3	protein-coding
1489-3	chr17	26916715	26918202	+	1250	intron (NM_053173, intron 1 of 10)	CpG	367	NM_053173	16580	Mm.491138	NM_016761	ENSMUSG00000024301	Kifc5b	Hset|KNSL2|Kifc5a	kinesin family member C5B	protein-coding
1929-02-01	chr17	6613651	6615578	+	1242	intron (NR_028305, intron 6 of 8)	intron (NR_028305, intron 6 of 8)	6311	NR_028305	100040525	Mm.472852	NR_028305		Tmem181c-ps	100040596|Tmem181d-ps	transmembrane protein 181C, pseudogene	pseudo
1659	chr9	120142160	120143817	+	1242	Intergenic	Intergenic	-6754	NR_153960	17433	Mm.432562	NM_008614	ENSMUSG00000032517	Mobp	AI835053|AI839848|MOBP155|MOBP170|MOBP69|MOBP73|MOBP81|R74645	myelin-associated oligodendrocytic basic protein	protein-coding
1623	chr1	91691664	91693285	+	1239	Intergenic	Intergenic	-108987	NM_007855	13345	Mm.9474	NM_007855	ENSMUSG00000007805	Twist2	Dermo1|bHLHa39	twist basic helix-loop-helix transcription factor 2	protein-coding
2138	chr4	135962342	135964478	+	1238	promoter-TSS (NM_001356493)	promoter-TSS (NM_001356493)	-315	NM_001356493	74246	Mm.247946	NM_178389	ENSMUSG00000028671	Gale	2310002A12Rik|AI323962	galactose-4-epimerase, UDP	protein-coding
6118	chrX	170808491	170814607	+	1237	Intergenic	Intergenic	138905	NM_001199212	107626	Mm.486144	NM_001199212	ENSMUSG00000093806	Asmt	Hiomt	acetylserotonin O-methyltransferase	protein-coding
1831	chr16	30183921	30185750	+	1237	Intergenic	Intergenic	82697	NM_027904	71756	Mm.290614	NM_027904	ENSMUSG00000023176	Cpn2	1300018K11Rik	carboxypeptidase N, polypeptide 2	protein-coding
1639	chr5	139343531	139345168	+	1230	intron (NM_197980, intron 1 of 2)	intron (NM_197980, intron 1 of 2)	817	NM_197980	68033	Mm.261064	NM_197980	ENSMUSG00000045438	Cox19	1810074D02Rik|2810437L13Rik	cytochrome c oxidase assembly protein 19	protein-coding
2094	chr10	58924327	58926419	+	1230	intron (NM_172788, intron 1 of 9)	(CAG)n|Simple_repeat|Simple_repeat	112014	NM_172788	237353	Mm.333078	NM_172788	ENSMUSG00000037990	Sh3rf3	4831416G18Rik|Igfbp5-ip|Sh3md4|Sh3rf31	SH3 domain containing ring finger 3	protein-coding
1447-2	chr8	25465352	25466797	+	1226	Intergenic	Intergenic	-52685	NM_001079909	14182	Mm.265716	NM_010206	ENSMUSG00000031565	Fgfr1	AW208770|Eask|FGFR-I|FLG|Fgfr-1|Flt-2|Fr1|Hspy|MFR|bFGF-R-1|c-fgr	fibroblast growth factor receptor 1	protein-coding
2332	chr7	109844737	109847067	+	1220	intron (NM_020052, intron 5 of 21)	(TCTCTG)n|Simple_repeat|Simple_repeat	19777	NM_020052	56788	Mm.40447	NM_020052	ENSMUSG00000007279	Scube2	4932442O19Rik|Cegf1|Cegp1	signal peptide, CUB domain, EGF-like 2	protein-coding
1929	chr13	65660240	65662167	+	1217	Intergenic	Intergenic	-312609	NM_001371118
1854	chr7	45458728	45460580	+	1216	5' UTR (NM_010240, exon 1 of 4)	5' UTR (NM_010240, exon 1 of 4)	232	NM_010240	14325	Mm.30357	NM_010240	ENSMUSG00000050708	Ftl1	Ftl|Ftl-1|L-ferritin	ferritin light polypeptide 1	protein-coding
1944	chr3	154580406	154582348	+	1195	intron (NM_001168358, intron 4 of 4)	(CACAG)n|Simple_repeat|Simple_repeat	-15334	NM_009968	12972	Mm.374855	NM_009968	ENSMUSG00000028199	Cryz	Sez9	crystallin, zeta	protein-coding
1510	chr11	69405316	69406824	+	1193	exon (NM_001017426, exon 12 of 24)	exon (NM_001017426, exon 12 of 24)	-7836	NM_025915	67020	Mm.390406	NM_025915	ENSMUSG00000045377	Tmem88	2600017H02Rik	transmembrane protein 88	protein-coding
1828	chr15	58936858	58938684	+	1184	intron (NM_023172, intron 3 of 3)	intron (NM_023172, intron 3 of 3)	3970	NM_023172	66218	Mm.322294	NM_023172	ENSMUSG00000022354	Ndufb9	1190008J14Rik|CI-B22	NADH:ubiquinone oxidoreductase subunit B9	protein-coding
1609	chr2	118761526	118763133	+	1183	intron (NM_001001982, intron 1 of 10)	intron (NM_001001982, intron 1 of 10)	332	NM_001001982	214239	Mm.379342	NM_001001982	ENSMUSG00000045838	Ccdc9b	A430105I19Rik|Gm353	coiled-coil domain containing 9B	protein-coding
2068	chr4	118555158	118557224	+	1183	intron (NM_026789, intron 22 of 22)	(GCTG)n|Simple_repeat|Simple_repeat	-12465	NM_172383	230678	Mm.23639	NM_172383	ENSMUSG00000050854	Tmem125	6330530A05Rik|AV223516	transmembrane protein 125	protein-coding
1895	chr7	24971437	24973330	+	1181	intron (NM_010261, intron 1 of 4)	intron (NM_010261, intron 1 of 4)	345	NM_010261	14470	Mm.22473	NM_010261	ENSMUSG00000003380	Rabac1	2310040I06Rik|Gbpap1|PRA1|prenylin	Rab acceptor 1 (prenylated)	protein-coding
1763	chr5	123075299	123077060	+	1180	promoter-TSS (NM_001039723)	promoter-TSS (NM_001039723)	-96	NM_001039723	330189	Mm.391872	NM_001039723	ENSMUSG00000054434	Tmem120b	-	transmembrane protein 120B	protein-coding
1721	chr1	33616362	33618081	+	1153	intron (NM_008922, intron 7 of 13)	RLTR10C|LTR|ERVK	52573	NM_008922	19076	Mm.27705	NM_008922	ENSMUSG00000026134	Prim2	AI323589	DNA primase, p58 subunit	protein-coding
1548-2	chr17	63862783	63864329	+	1152	promoter-TSS (NM_001037997)	promoter-TSS (NM_001037997)	-425	NM_001037997	14158	Mm.23039	NM_008000	ENSMUSG00000000127	Fer	AV082135|C330004K01Rik|Fert|Fert2	fer (fms/fps related) protein kinase	protein-coding
1634	chr10	81265379	81267011	+	1145	intron (NM_025317, intron 1 of 2)	PB1D9|SINE|Alu	731	NM_025317	66047	Mm.43397	NM_025317	ENSMUSG00000034932	Mrpl54	0610008M19Rik|D10Sut1e	mitochondrial ribosomal protein L54	protein-coding
1699	chr10	127403456	127405153	+	1132	intron (NM_001359244, intron 3 of 25)	intron (NM_001359244, intron 3 of 25)	13993	NM_001168292	71750	Mm.29342	NM_027900	ENSMUSG00000025404	R3hdm2	1300003K24Rik|AU041262|mKIAA1002	R3H domain containing 2	protein-coding
1523	chr2	59829276	59830797	+	1111	intron (NM_198294, intron 19 of 26)	intron (NM_198294, intron 19 of 26)	52570	NM_001159636	72137	Mm.288734	NM_028118	ENSMUSG00000026988	Wdsub1	1700048E19Rik|2610014F08Rik	WD repeat, SAM and U-box domain containing 1	protein-coding
1968	chr15	35817442	35819408	+	1107	intron (NM_177151, intron 39 of 61)	(CAGTG)n|Simple_repeat|Simple_repeat	119821	NM_053071	12864	Mm.548	NM_053071	ENSMUSG00000014313	Cox6c	-	cytochrome c oxidase subunit 6C	protein-coding
1719	chr15	36726360	36728077	+	1089	Intergenic	RMER17C-int|LTR|ERVK	63714	NM_001253807	22631	Mm.3360	NM_011740	ENSMUSG00000022285	Ywhaz	1110013I11Rik|14-3-3zeta|AI596267|AL022924|AU020854	tyrosine 3-monooxygenase/tryptophan 5-monooxygenase activation protein, zeta polypeptide	protein-coding
1468-4	chr14	20180740	20182206	+	1083	5' UTR (NM_021542, exon 1 of 5)	5' UTR (NM_021542, exon 1 of 5)	309	NM_021542	16529	Mm.68998	NM_021542	ENSMUSG00000023243	Kcnk5	KCNK5b|TASK-2	potassium channel, subfamily K, member 5	protein-coding
1379	chr1	74601365	74602742	+	1075	promoter-TSS (NM_021313)	promoter-TSS (NM_021313)	598	NM_175031	269209	Mm.310974	NM_175031	ENSMUSG00000033276	Stk36	1700112N14Rik|B930045J24|FU|Fused|mKIAA1278	serine/threonine kinase 36	protein-coding
1816-2	chr12	112781142	112782956	+	1067	Intergenic	Intergenic	21394	NM_178911	104759	Mm.203915	NM_178911	ENSMUSG00000052160	Pld4	AI132321|thss	phospholipase D family, member 4	protein-coding
1481	chr10	75150238	75151717	+	1061	intron (NM_001081412, intron 8 of 22)	intron (NM_001081412, intron 8 of 22)	-61096	NM_153406	74392	Mm.27716	NM_153406	ENSMUSG00000033444	Specc1l	4930470P14Rik|4932439K10Rik|9530057A13Rik|AI317249|Cytsa|mKIAA0376	sperm antigen with calponin homology and coiled-coil domains 1-like	protein-coding
1723	chr5	124777883	124779604	+	1061	intron (NM_019536, intron 34 of 78)	(CACAC)n|Simple_repeat|Simple_repeat	53658	NM_019536	56087	Mm.261014	NM_019536	ENSMUSG00000038011	Dnah10	Dnahc10	dynein, axonemal, heavy chain 10	protein-coding
1896	chr12	112783167	112785061	+	1054	Intergenic	Intergenic	23459	NM_178911	104759	Mm.203915	NM_178911	ENSMUSG00000052160	Pld4	AI132321|thss	phospholipase D family, member 4	protein-coding
1393	chr11	22631977	22633368	+	1048	Intergenic	Intergenic	120389	NM_153596	103765	Mm.221274	NM_153596	ENSMUSG00000049904	Tmem17	AI503894|AW049890	transmembrane protein 17	protein-coding
1624	chr11	103013374	103014996	+	1046	intron (NM_026551, intron 1 of 4)	intron (NM_026551, intron 1 of 4)	2962	NM_026551	68087	Mm.277449	NM_026551	ENSMUSG00000020935	Dcakd	3010024O21Rik|6720485C15Rik|AI849483	dephospho-CoA kinase domain containing	protein-coding
1620	chr12	40444860	40446478	+	1040	promoter-TSS (NM_172803)	promoter-TSS (NM_172803)	121	NM_172575	246196	Mm.26852	NM_172575	ENSMUSG00000055917	Zfp277	2410017E24Rik|NIRF4	zinc finger protein 277	protein-coding
2027	chr17	46234190	46236215	+	1028	intron (NM_028198, intron 22 of 31)	(GTGTG)n|Simple_repeat|Simple_repeat	3671	NR_030466	751553		NR_030466	ENSMUSG00000076141	Mir693	Mirn693|mir-693|mmu-mir-693	microRNA 693	ncRNA
1580-2	chr5	24423121	24424699	+	1025	promoter-TSS (NM_007668)	promoter-TSS (NM_007668)	-346	NM_007668	12568	Mm.298798	NM_007668	ENSMUSG00000028969	Cdk5	AW048668|Crk6	cyclin-dependent kinase 5	protein-coding
1832	chr18	58674860	58676690	+	1024	intron (NM_025478, intron 4 of 4)	intron (NM_025478, intron 4 of 4)	16293	NM_025478	66307	Mm.182574	NM_025478	ENSMUSG00000024601	Isoc1	2610034N03Rik	isochorismatase domain containing 1	protein-coding
2503	chr6	87110286	87112787	+	1021	exon (NM_001167938, exon 2 of 2)	exon (NM_001167938, exon 2 of 2)	6790	NM_001167937	52372	Mm.282851	NM_001167937	ENSMUSG00000090891	D6Ertd527e	AU043841	DNA segment, Chr 6, ERATO Doi 527, expressed	protein-coding
1643	chr4	155561842	155563483	+	1015	intron (NM_138671, intron 1 of 11)	intron (NM_138671, intron 1 of 11)	281	NM_138671	192185	Mm.28347	NM_138671	ENSMUSG00000029063	Nadk	4432404C02Rik|BC004012	NAD kinase	protein-coding
1419-2	chr14	69757740	69759157	+	1015	intron (NR_130157, intron 2 of 2)	(CAG)n|Simple_repeat|Simple_repeat	-9024	NM_020275	21933	Mm.193430	NM_020275	ENSMUSG00000022074	Tnfrsf10b	DR5|KILLER|Ly98|MK|TRAILR2|TRICK2A|TRICK2B|TRICKB	tumor necrosis factor receptor superfamily, member 10b	protein-coding
1614	chr11	120579464	120581076	+	1014	exon (NM_001363425, exon 2 of 6)	exon (NM_001363425, exon 2 of 6)	977	NM_001363425	192662	Mm.30016	NM_133796	ENSMUSG00000025132	Arhgdia	5330430M07Rik|Gdi-1|Rho GDI alpha|Rho-GDI|RhoDGI|RhoGDI-1|rho GDI 1|rho-GDI alpha	Rho GDP dissociation inhibitor (GDI) alpha	protein-coding
1451	chr10	59894584	59896033	+	1014	intron (NM_019965, intron 6 of 8)	intron (NM_019965, intron 6 of 8)	15717	NM_019965	56709	Mm.103610	NM_019965	ENSMUSG00000020109	Dnajb12	Dj10|mDj10	DnaJ heat shock protein family (Hsp40) member B12	protein-coding
1885-2	chr19	56284436	56286319	+	1013	Intergenic	Intergenic	-2535	NM_001329936	226243	Mm.25791	NM_146101	ENSMUSG00000025075	Habp2	AI035669|FSAP|HABP|HGFAL|PHBP	hyaluronic acid binding protein 2	protein-coding
1735	chr12	108932300	108934033	+	997	intron (NM_177602, intron 2 of 6)	intron (NM_177602, intron 2 of 6)	38894	NM_177602	212198	Mm.342082	NM_177602	ENSMUSG00000040877	Wdr25	B930090D16Rik	WD repeat domain 25	protein-coding
1426	chr8	122173702	122175126	+	993	Intergenic	Intergenic	-55860	NM_001362883	195209	Mm.102191	NM_001362883		Zfp469	Gm22	zinc finger protein 469	protein-coding
1498-2	chr1	152840097	152841593	+	993	intron (NM_001359257, intron 21 of 23)	B3|SINE|B2	40692	NM_010877	17970	Mm.270307	NM_010877	ENSMUSG00000026480	Ncf2	NOXA2|Ncf-2|p67phox	neutrophil cytosolic factor 2	protein-coding
1562	chr16	18248082	18249642	+	992	promoter-TSS (NM_011239)	promoter-TSS (NM_011239)	-21	NM_001357146	15547	Mm.271798	NM_008307	ENSMUSG00000022721	Trmt2a	Htf9c	TRM2 tRNA methyltransferase 2A	protein-coding
1570	chr2	31657405	31658973	+	988	Intergenic	(CAG)n|Simple_repeat|Simple_repeat	-12526	NM_144886	227715	Mm.150972	NM_144886	ENSMUSG00000039356	Exosc2	Rrp4	exosome component 2	protein-coding
2605	chr9	55572464	55575067	+	983	intron (NM_001357652, intron 30 of 32)	intron (NM_001357652, intron 30 of 32)	-16985	NM_001357653	244891	Mm.86588	NM_175536	ENSMUSG00000034007	Scaper	C430017I08|D530014O03Rik|Zfp291	S phase cyclin A-associated protein in the ER	protein-coding
1353	chr15	73153831	73155182	+	982	intron (NM_153178, intron 1 of 18)	intron (NM_153178, intron 1 of 18)	30441	NM_153178	239528	Mm.23095	NM_153178	ENSMUSG00000036698	Ago2	1110029L17Rik|2310051F07Rik|AI225898|AL022874|AW546247|Eif2c2|Gerp95|Gm10365|mKIAA4215	argonaute RISC catalytic subunit 2	protein-coding
1487	chr2	32918323	32919808	+	981	exon (NM_146119, exon 6 of 14)	exon (NM_146119, exon 6 of 14)	42190	NM_199302	227738	Mm.248037	NM_199302	ENSMUSG00000026792	Lrsam1	-	leucine rich repeat and sterile alpha motif containing 1	protein-coding
1694	chr11	114411611	114413303	+	979	TTS (NR_027643)	TTS (NR_027643)	36403	NR_027643	319819	Mm.50754	NM_177008	ENSMUSG00000062391	4932435O22Rik	-	RIKEN cDNA 4932435O22 gene	ncRNA
1380	chr1	51689216	51690594	+	969	Intergenic	Intergenic	-93187	NR_151621	100045066	Mm.404734	NR_151621		Gm17767	-	predicted gene, 17767	ncRNA
1675	chr19	5802946	5804619	+	965	Intergenic	CpG	-1110	NR_002847	72289	Mm.298256	NR_002847	ENSMUSG00000092341	Malat1	2210401K01Rik|9430072K23Rik|AI647968|Neat2	metastasis associated lung adenocarcinoma transcript 1 (non-coding RNA)	ncRNA
1218-4	chr13	97197406	97198622	+	965	intron (NM_010422, intron 1 of 13)	intron (NM_010422, intron 1 of 13)	343	NM_010422	15212	Mm.27816	NM_010422	ENSMUSG00000021665	Hexb	-	hexosaminidase B	protein-coding
2007	chr9	83089665	83091670	+	962	Intergenic	(CAG)n|Simple_repeat|Simple_repeat	55940	NM_175074	94353	Mm.244426	NM_026122	ENSMUSG00000066456	Hmgn3	1110002A15Rik|6330514M13Rik|BB071015|TRIP7	high mobility group nucleosomal binding domain 3	protein-coding
2356	chr2	28523681	28526035	+	961	intron (NM_001145834, intron 1 of 17)	intron (NM_001145834, intron 1 of 17)	-8606	NM_001145835	19730	Mm.5236	NM_009058	ENSMUSG00000026821	Ralgds	Gnds|Rgds|mKIAA1308	ral guanine nucleotide dissociation stimulator	protein-coding
1631	chr10	67938924	67940553	+	956	Intergenic	Intergenic	-27076	NM_178679	216049	Mm.268346	NM_178679	ENSMUSG00000037855	Zfp365	AI839779|AV340892|DBZ|Su48|Znf365|talanin	zinc finger protein 365	protein-coding
1356	chr12	36598986	36600340	+	953	intron (NM_178629, intron 9 of 9)	intron (NM_178629, intron 9 of 9)	184047	NR_037309	100499526		NR_037309	ENSMUSG00000092917	Mir3472	mmu-mir-3472	microRNA 3472	ncRNA
1638	chr13	34418884	34420520	+	952	Intergenic	(CAG)n|Simple_repeat|Simple_repeat	-74520	NM_001033167	73102	Mm.23932	NM_001033167	ENSMUSG00000038267	Slc22a23	3110004L20Rik	solute carrier family 22, member 23	protein-coding
1188-3	chr7	45800560	45801746	+	946	intron (NM_001005511, intron 15 of 15)	intron (NM_001005511, intron 15 of 15)	13163	NM_011181	19158	Mm.272130	NM_011181	ENSMUSG00000003269	Cyth2	ARNO|CLM2|Pscd2	cytohesin 2	protein-coding
1250-2	chr15	79196201	79197449	+	944	intron (NR_029470, intron 2 of 4)	intron (NR_029470, intron 2 of 4)	30759	NR_029470	100041655	Mm.483310	NR_029470	ENSMUSG00000075555	Gm10863	-	predicted gene 10863	ncRNA
1959	chr12	111428456	111430413	+	938	exon (NM_001289488, exon 13 of 14)	exon (NM_001289488, exon 13 of 14)	11989	NM_001289488	74190	Mm.248640	NM_028807	ENSMUSG00000021280	Exoc3l4	1200009I06Rik|1600013K19Rik	exocyst complex component 3-like 4	protein-coding
1407	chr15	76462763	76464168	+	938	intron (NM_013481, intron 3 of 15)	intron (NM_013481, intron 3 of 15)	6027	NM_198885	20289	Mm.322821	NM_198885	ENSMUSG00000034161	Scx	BB114693|Bhlha41|Scl	scleraxis	protein-coding
1542	chr3	135627921	135629461	+	938	intron (NM_008689, intron 6 of 24)	intron (NM_008689, intron 6 of 24)	62856	NM_008689	18033	Mm.256765	NM_008689	ENSMUSG00000028163	Nfkb1	NF-KB1|NF-kappaB|NF-kappaB1|p105|p50|p50/p105	nuclear factor of kappa light polypeptide gene enhancer in B cells 1, p105	protein-coding
1736	chr14	70567768	70569502	+	935	intron (NM_021877, intron 17 of 19)	intron (NM_021877, intron 17 of 19)	-9189	NM_153136	213484	Mm.34191	NM_153136	ENSMUSG00000045211	Nudt18	BC036718	nudix (nucleoside diphosphate linked moiety X)-type motif 18	protein-coding
1381	chr11	65646494	65647873	+	933	Intergenic	Intergenic	87649	NR_030417	791070		NR_030417	ENSMUSG00000076460	Mir744	Mirn744|mir-744|mmu-mir-744	microRNA 744	ncRNA
1599	chr17	65920513	65922110	+	933	Intergenic	Intergenic	29876	NM_023053	65960	Mm.10153	NM_023053	ENSMUSG00000024098	Twsg1	1810013J15Rik|9030422N06Rik|AW552143|D17Ertd403e|Tsg|Twg	twisted gastrulation BMP signaling modulator 1	protein-coding
1448-3	chr5	24576678	24578124	+	933	promoter-TSS (NM_001190443)	promoter-TSS (NM_001190443)	-55	NM_001359205	27407	Mm.21629	NM_013853	ENSMUSG00000028953	Abcf2	0710005O05Rik|Drr3|E430001O06	ATP-binding cassette, sub-family F (GCN20), member 2	protein-coding
1504-2	chr3	95015437	95016939	+	929	promoter-TSS (NM_030074)	promoter-TSS (NM_030074)	-731	NM_001357863	78266	Mm.389478	NM_030074	ENSMUSG00000019338	Zfp687	4931408L03Rik|Znf687|mKIAA1441	zinc finger protein 687	protein-coding
1166-4	chr19	37688691	37689855	+	927	intron (NM_001105201, intron 4 of 5)	intron (NM_001105201, intron 4 of 5)	3593	NM_001105201	546726	Mm.457750	NM_001105201	ENSMUSG00000062432	Cyp26c1	EG546726	cytochrome P450, family 26, subfamily c, polypeptide 1	protein-coding
1493-2	chr15	78718484	78719975	+	926	promoter-TSS (NM_001358692)	promoter-TSS (NM_001358692)	-458	NM_001358692	207393	Mm.323188	NM_183141	ENSMUSG00000043460	Elfn2	6330514E13|AW048948|BC094219|Lrrc62|Ppp1r29	leucine rich repeat and fibronectin type III, extracellular 2	protein-coding
1223	chr16	95824555	95825776	+	922	Intergenic	Intergenic	73548	NR_040485	69776	Mm.120470	NR_040484	ENSMUSG00000117232	1600002D24Rik	-	RIKEN cDNA 1600002D24 gene	ncRNA
1209	chr12	72663971	72665178	+	920	intron (NM_025522, intron 1 of 6)	intron (NM_025522, intron 1 of 6)	254	NM_025522	66375	Mm.289653	NM_025522	ENSMUSG00000021094	Dhrs7	2310016E22Rik|5730564L20Rik|AW061210|Retdsr4|Retsdr4	dehydrogenase/reductase (SDR family) member 7	protein-coding
1929-03-01	chr5	111120814	111122741	+	920	intron (NM_001267622, intron 5 of 22)	intron (NM_001267622, intron 5 of 22)	117633	NR_030482	735278		NR_030482	ENSMUSG00000076163	Mir701	Mirn701|mir-701|mmu-mir-701	microRNA 701	ncRNA
1580	chr2	17961090	17962668	+	918	Intergenic	RMER19A|LTR|ERVK	35079	NM_026627	68231	Mm.23887	NM_026627	ENSMUSG00000062651	H2al2a	1700113O17Rik|H2A.Bbd|H2A.L.2|H2afb1|H2al2|TSEG-1|Tseg1	H2A histone family member L2A	protein-coding
1682	chrX	170838126	170839806	+	917	Intergenic	Intergenic	166322	NM_001199212	107626	Mm.486144	NM_001199212	ENSMUSG00000093806	Asmt	Hiomt	acetylserotonin O-methyltransferase	protein-coding
1534	chr13	58653626	58655158	+	917	Intergenic	Intergenic	-43515	NM_022317	114304	Mm.18188	NM_022317	ENSMUSG00000021553	Slc28a3	Cnt3	solute carrier family 28 (sodium-coupled nucleoside transporter), member 3	protein-coding
1445-3	chr2	91264288	91265731	+	916	promoter-TSS (NM_023854)	promoter-TSS (NM_023854)	-106	NM_001166024	77038	Mm.43636	NM_023854	ENSMUSG00000027255	Arfgap2	2310032E02Rik|Zfp289	ADP-ribosylation factor GTPase activating protein 2	protein-coding
1356-2	chr15	78343180	78344534	+	916	intron (NM_001358854, intron 9 of 14)	ORR1D1|LTR|ERVL-MaLR	-4742	NR_106137	102465776		NR_106137	ENSMUSG00000098996	Mir7676-1	Gm27600|mmu-mir-7676-1	microRNA 7676-1	ncRNA
1627	chr9	62640104	62641729	+	913	Intergenic	(CAGCC)n|Simple_repeat|Simple_repeat	-36939	NM_176922	319480	Mm.34883	NM_176922	ENSMUSG00000032243	Itga11	4732459H24Rik	integrin alpha 11	protein-coding
1263-2	chr17	33955392	33956653	+	913	promoter-TSS (NM_011296)	promoter-TSS (NM_011296)	-68	NM_001357329	224705	Mm.448614	NM_172620	ENSMUSG00000024319	Vps52	ARE1|D130068D18|D430041K17Rik|SAC2|Sacm2l|tclw5	VPS52 GARP complex subunit	protein-coding
1664	chr3	109328975	109330637	+	912	Intergenic	(CTG)n|Simple_repeat|Simple_repeat	-10877	NM_020505	57257	Mm.282257	NM_020505	ENSMUSG00000033721	Vav3	A530094I06Rik|AA986410|Idd18.1	vav 3 oncogene	protein-coding
1345-2	chr19	58302503	58303846	+	912	intron (NM_001285457, intron 4 of 9)	intron (NM_001285457, intron 4 of 9)	6970	NR_040449	791347	Mm.452208	NR_040449		Gm10007	-	predicted gene 10007	ncRNA
1655	chr15	101195265	101196918	+	911	intron (NM_007395, intron 3 of 8)	(TTG)n|Simple_repeat|Simple_repeat	2222	NR_105927	102466774		NR_105927	ENSMUSG00000106563	Mir6962	mmu-mir-6962	microRNA 6962	ncRNA
1484	chr18	76453327	76454809	+	909	Intergenic	SUBTEL_sa|Satellite|Satellite	191623	NM_001311070	17126	Mm.152699	NM_010754	ENSMUSG00000024563	Smad2	7120426M23Rik|Madh2|Madr2|Smad-2|mMad2	SMAD family member 2	protein-coding
1613-2	chr12	118301575	118303186	+	907	promoter-TSS (NM_001166385)	promoter-TSS (NM_001166385)	-940	NM_001166385	20688	Mm.34699	NM_009239	ENSMUSG00000025323	Sp4	5730497N03Rik|HF-1b|HF1-b	trans-acting transcription factor 4	protein-coding
1315-3	chr5	113974771	113976084	+	906	intron (NM_198109, intron 2 of 14)	intron (NM_198109, intron 2 of 14)	18363	NM_198109	231637	Mm.389682	NM_198109	ENSMUSG00000042121	Ssh1	AW551225|Gm1394|Gm1395|SSH-1|SSH-1L	slingshot protein phosphatase 1	protein-coding
1545	chr15	25652568	25654111	+	903	intron (NM_019472, intron 1 of 40)	intron (NM_019472, intron 1 of 40)	30789	NM_019472	17909	Mm.60590	NM_019472	ENSMUSG00000022272	Myo10	AW048724|D15Ertd600e|mKIAA0799|myosin-X	myosin X	protein-coding
1456	chr12	84616532	84617986	+	902	intron (NM_008992, intron 1 of 18)	CpG	207	NM_008992	19300	Mm.229109	NM_008992	ENSMUSG00000021240	Abcd4	P69r|P70R|Pxmp1l	ATP-binding cassette, sub-family D (ALD), member 4	protein-coding
1450-2	chr16	26992637	26994085	+	900	Intergenic	(TG)n|Simple_repeat|Simple_repeat	-1709	NM_001285918	239789	Mm.326909	NM_001013761	ENSMUSG00000068428	Gmnc	Gemc1|Gm1778|Gm606	geminin coiled-coil domain containing	protein-coding
1593	chr2	167543100	167544691	+	900	Intergenic	MIRb|SINE|MIR	5700	NM_011427	20613	Mm.2093	NM_011427	ENSMUSG00000042821	Snai1	Sna|Sna1|Snail|Snail1	snail family zinc finger 1	protein-coding
1457-2	chr2	5165945	5167400	+	900	intron (NM_028804, intron 2 of 2)	intron (NM_028804, intron 2 of 2)	28896	NM_028804	74186	Mm.274715	NM_028804	ENSMUSG00000026676	Ccdc3	2310045O21Rik	coiled-coil domain containing 3	protein-coding
1211-5	chr7	92740806	92742015	+	898	promoter-TSS (NM_029494)	promoter-TSS (NM_029494)	49	NR_015510	666737	Mm.473620	NR_015510	ENSMUSG00000074024	4632427E13Rik	AU015482	RIKEN cDNA 4632427E13 gene	ncRNA
1455	chr1	82290107	82291560	+	897	5' UTR (NM_010570, exon 1 of 2)	5' UTR (NM_010570, exon 1 of 2)	606	NM_010570	16367	Mm.4952	NM_010570	ENSMUSG00000055980	Irs1	G972R|IRS-1	insulin receptor substrate 1	protein-coding
2021	chr15	75268039	75270058	+	895	intron (NM_008530, intron 2 of 3)	intron (NM_008530, intron 2 of 3)	627	NM_008530	17071	Mm.377095	NM_008530	ENSMUSG00000022583	Ly6f	-	lymphocyte antigen 6 complex, locus F	protein-coding
1344-2	chr5	23711854	23713196	+	895	intron (NR_038090, intron 1 of 2)	CpG	142	NR_038090	433855	Mm.205125	NR_015554	ENSMUSG00000105987	AI506816	-	expressed sequence AI506816	ncRNA
1680	chr15	86250468	86252146	+	895	intron (NM_145476, intron 4 of 12)	intron (NM_145476, intron 4 of 12)	-26368	NM_001358062	223754	Mm.28904	NM_145476	ENSMUSG00000051864	Tbc1d22a	BC023106|D15Ertd781e	TBC1 domain family, member 22a	protein-coding
1180-2	chr13	14531943	14533121	+	894	Intergenic	Lx6|LINE|L1	-9306	NM_001081348	94253	Mm.125298	NM_153130	ENSMUSG00000021301	Hecw1	9330116H24Rik|AV273951|E130207I19Rik|Nedl1	HECT, C2 and WW domain containing E3 ubiquitin protein ligase 1	protein-coding
1392	chr1	151650626	151652016	+	894	intron (NM_022018, intron 5 of 13)	intron (NM_022018, intron 5 of 13)	79948	NM_022018	63913	Mm.157700	NM_022018	ENSMUSG00000026483	Fam129a	AI256368|AU019833|Niban	family with sequence similarity 129, member A	protein-coding
1510-2	chr15	66933555	66935063	+	892	intron (NM_008681, intron 14 of 15)	intron (NM_008681, intron 14 of 15)	35332	NM_008681	17988	Mm.30837	NM_008681	ENSMUSG00000005125	Ndrg1	CAP43|CMT4D|DRG1|HMSNL|NMSL|Ndr1|Ndrl|PROXY1|RTP|TDD5	N-myc downstream regulated gene 1	protein-coding
1489	chr10	126999585	127001072	+	892	promoter-TSS (NM_009635)	promoter-TSS (NM_009635)	-381	NM_009635	11567	Mm.10739	NM_009635	ENSMUSG00000025432	Avil	Advil|DOC6	advillin	protein-coding
1785	chr14	48236396	48238179	+	891	intron (NM_033602, intron 2 of 5)	(CTGTG)n|Simple_repeat|Simple_repeat	38571	NR_003630	624367	Mm.445185	NM_001037921	ENSMUSG00000021846	Gm6498	EG624367	glyceraldehyde-3-phosphate dehydrogenase pseudogene	pseudo
1835	chr10	94569407	94571240	+	891	intron (NM_001359760, intron 1 of 3)	(TGG)n|Simple_repeat|Simple_repeat	-4934	NM_001168684	319880	Mm.23047	NM_172051	ENSMUSG00000020023	Tmcc3	A230066D03Rik|AW488095|C630016B22Rik|C88213|Gm1556|Tmcc1	transmembrane and coiled coil domains 3	protein-coding
1333	chr11	5794959	5796290	+	891	intron (NM_013810, intron 5 of 12)	intron (NM_013810, intron 5 of 12)	7141	NM_013810	13169	Mm.256925	NM_013810	ENSMUSG00000020476	Dbnl	Abp1|SH3P7|mAbp1	drebrin-like	protein-coding
1338-2	chr10	80148779	80150115	+	891	promoter-TSS (NM_001305799)	promoter-TSS (NM_001305799)	-235	NM_001305799	59090	Mm.143813	NM_021565	ENSMUSG00000035621	Midn	3000003C15Rik	midnolin	protein-coding
1554	chr11	3547930	3549482	+	889	Intergenic	ORR1C2|LTR|ERVL-MaLR	-9414	NM_001284428	29856	Mm.188516	NM_013870	ENSMUSG00000020439	Smtn	smsmo	smoothelin	protein-coding
1622	chr10	39597788	39599408	+	889	intron (NR_152260, intron 2 of 2)	intron (NR_152260, intron 2 of 2)	-14336	NM_134000	103213	Mm.436686	NM_134000	ENSMUSG00000019842	Traf3ip2	AI429613|Act1|CIKS	TRAF3 interacting protein 2	protein-coding
1554-2	chr15	85709336	85710888	+	887	Intergenic	Intergenic	2793	NR_029727	387245		NR_029727	ENSMUSG00000065564	Mirlet7b	Mirnlet7b|let-7b|mmu-let-7b	microRNA let7b	ncRNA
2380	chr19	53313404	53315782	+	887	intron (NM_001360348, intron 1 of 5)	intron (NM_001360348, intron 1 of 5)	3148	NM_001360348	17859	Mm.2154	NM_010847	ENSMUSG00000025025	Mxi1	Gm10197|Mad2|bHLHc11	MAX interactor 1, dimerization protein	protein-coding
1280-6	chr2	166448474	166449752	+	886	intron (NR_015558, intron 1 of 2)	intron (NR_015558, intron 1 of 2)	1662	NR_015558	319684	Mm.399746	NR_015558		5031425F14Rik	-	RIKEN cDNA 5031425F14 gene	ncRNA
1419	chr10	8348016	8349433	+	884	intron (NM_177387, intron 2 of 7)	intron (NM_177387, intron 2 of 7)	170101	NM_177387	338362	Mm.41163	NM_177387	ENSMUSG00000047712	Ust	D930010O20Rik|UA2OST	uronyl-2-sulfotransferase	protein-coding
1418	chr10	60218454	60219870	+	880	promoter-TSS (NM_016803)	promoter-TSS (NM_016803)	98	NM_016803	53374	Mm.12866	NM_016803	ENSMUSG00000057337	Chst3	C6ST|C6ST-1|GST-0	carbohydrate sulfotransferase 3	protein-coding
1821	chr2	90504005	90505824	+	880	intron (NM_008982, intron 1 of 23)	intron (NM_008982, intron 1 of 23)	-25740	NM_001135657	19271	Mm.330393	NM_008982	ENSMUSG00000025314	Ptprj	AI450271|BET|Byp|CD148|DEP-1|PTPbeta2|Ptpb2|RPTPJ|Scc-1|Scc1	protein tyrosine phosphatase, receptor type, J	protein-coding
1429	chr2	180610223	180611650	+	879	intron (NM_009936, intron 22 of 31)	intron (NM_009936, intron 22 of 31)	12714	NM_009936	12841	Mm.141312	NM_009936	ENSMUSG00000027570	Col9a3	AV006866	collagen, type IX, alpha 3	protein-coding
1784	chr19	57459019	57460801	+	879	intron (NM_029839, intron 2 of 6)	intron (NM_029839, intron 2 of 6)	7004	NM_028115	72133	Mm.258404	NM_028115	ENSMUSG00000025086	Trub1	2610009I02Rik|9030425C13Rik|AI448235|BB118943|C76870	TruB pseudouridine (psi) synthase family member 1	protein-coding
2408	chr3	154608388	154610794	+	877	intron (NM_001357673, intron 3 of 8)	(TCTCTG)n|Simple_repeat|Simple_repeat	12394	NR_151773	12972	Mm.374855	NM_009968	ENSMUSG00000028199	Cryz	Sez9	crystallin, zeta	protein-coding
1380-2	chr5	125267875	125269253	+	877	Intergenic	Intergenic	72530	NM_016741	20778	Mm.282242	NM_016741	ENSMUSG00000037936	Scarb1	AI120173|CD36|Cd36l1|Chohd1|Cla-1|Cla1|D5Ertd460e|Hdlq1|Hlb398|SR-B1|SR-BI|SRBI|Srb1|mSR-BI	scavenger receptor class B, member 1	protein-coding
1222-5	chr2	71729945	71731165	+	874	intron (NR_037979, intron 3 of 3)	intron (NR_037979, intron 3 of 3)	11138	NR_037979	381371	Mm.330284	NM_201366	ENSMUSG00000064263	Platr26	Gm1631	pluripotency associated transcript 26	ncRNA
1126-4	chr5	151251814	151252938	+	873	Intergenic	Intergenic	-62183	NR_153382	243362	Mm.209272	NM_146258	ENSMUSG00000016128	Stard13	DLC2|GT650	StAR-related lipid transfer (START) domain containing 13	protein-coding
1207-5	chr4	135886010	135887215	+	866	Intergenic	B1F|SINE|Alu	-8577	NM_009924	12802	Mm.297251	NM_009924	ENSMUSG00000062585	Cnr2	CB-2|CB2|CB2-R	cannabinoid receptor 2 (macrophage)	protein-coding
1734	chr10	77135434	77137166	+	866	intron (NM_009929, intron 2 of 41)	intron (NM_009929, intron 2 of 41)	-22595	NM_001109991	12822	Mm.4352	NM_009929	ENSMUSG00000001435	Col18a1	-	collagen, type XVIII, alpha 1	protein-coding
1474	chrX	74678250	74679722	+	866	Intergenic	Intergenic	-33351	NM_001099302	434797	Mm.391298	NM_001099302	ENSMUSG00000079534	Gm5640	EG434797	predicted gene 5640	protein-coding
1370-3	chr7	25755387	25756755	+	866	TTS (NM_001190975)	TTS (NM_001190975)	-1312	NM_178089	232989	Mm.254223	NM_144922	ENSMUSG00000040725	Hnrnpul1	E130317O14Rik|E1B-AP5|E1BAP5|Hnrnpul|Hnrpul1	heterogeneous nuclear ribonucleoprotein U-like 1	protein-coding
1626	chr6	31835506	31837130	+	864	Intergenic	Intergenic	-170187	NR_152155	434003	Mm.332979	NR_152155	ENSMUSG00000084973	Gm13848	-	predicted gene 13848	ncRNA
1370-2	chr15	102135218	102136586	+	861	intron (NM_001033277, intron 1 of 10)	CpG	313	NM_001033277	223918	Mm.385009	NM_001033277	ENSMUSG00000036966	Spryd3	BC008150	SPRY domain containing 3	protein-coding
1556	chr10	100345818	100347372	+	861	exon (NM_001166638, exon 1 of 1).3	exon (NM_001166638, exon 1 of 1).3	623	NM_001166639	100043235	Mm.484968	NM_001166639	ENSMUSG00000112856	Gm4305	-	predicted gene 4305	protein-coding
2416	chr4	106825073	106827487	+	861	Intergenic	Intergenic	-21273	NM_001347159	329910	Mm.222956	NM_025590	ENSMUSG00000034853	Acot11	1110020M10Rik|2010309H15Rik|AW060409|BFIT|BFIT1|Thea|Them1|mKIAA0707	acyl-CoA thioesterase 11	protein-coding
1378-2	chr11	32423131	32424507	+	859	3' UTR (NM_177364, exon 13 of 13)	3' UTR (NM_177364, exon 13 of 13)	-31551	NM_001361561	327900	Mm.260956	NM_173784	ENSMUSG00000044949	Ubtd2	4930571L24|9630054F20Rik|AI645720	ubiquitin domain containing 2	protein-coding
1512	chr15	36908138	36909648	+	859	Intergenic	Intergenic	98509	NM_026521	68036	Mm.371631	NM_026521	ENSMUSG00000062397	Zfp706	3110006P09Rik|AA793007|AW536850|C77232|Znf706	zinc finger protein 706	protein-coding
1575	chr10	100350933	100352506	+	856	exon (NM_001166638, exon 1 of 1)	exon (NM_001166638, exon 1 of 1)	626	NM_001166641	100043239	Mm.475613	NM_001166641	ENSMUSG00000096744	Gm4307	-	predicted gene 4307	protein-coding
1121	chr11	67939165	67940284	+	854	intron (NM_027963, intron 7 of 13)	intron (NM_027963, intron 7 of 13)	-17571	NM_173754	216835	Mm.158885	NM_173754	ENSMUSG00000020905	Usp43	-	ubiquitin specific peptidase 43	protein-coding
1683	chr8	84989745	84991426	+	854	promoter-TSS (NM_001167991)	promoter-TSS (NM_001167991)	-1	NM_001363498	170833	Mm.247775	NM_133255	ENSMUSG00000052566	Hook2	A630054I03Rik|mHK2	hook microtubule tethering protein 2	protein-coding
1462	chr17	6755867	6757327	+	853	intron (NM_009510, intron 2 of 12)	B3A|SINE|B2	26183	NM_009510	22350	Mm.277812	NM_009510	ENSMUSG00000052397	Ezr	AW146364|R75297|Vil2|p81	ezrin	protein-coding
1697	chr17	83317896	83319591	+	852	Intergenic	(CTG)n|Simple_repeat|Simple_repeat	-32188	NM_001114361	78798	Mm.295565	NM_199466	ENSMUSG00000032624	Eml4	4930443C24Rik|AI644019	echinoderm microtubule associated protein like 4	protein-coding
1203-2	chr11	96776754	96777955	+	852	intron (NM_001163389, intron 1 of 7)	intron (NM_001163389, intron 1 of 7)	201	NM_028965	74479	Mm.270781	NM_028965	ENSMUSG00000020876	Snx11	4933439F10Rik|A930041K09Rik|AI117694	sorting nexin 11	protein-coding
1133-4	chr3	96515098	96516229	+	851	Intergenic	MER5B|DNA|hAT-Charlie	-9522	NM_027126	69585	Mm.171314	NM_027126	ENSMUSG00000038403	Hjv	2310035L15Rik|5230400G09Rik|AI414844|AI789733|DL-M|Hfe2|Rgmc|hemojuvelin	hemojuvelin BMP co-receptor	protein-coding
1108-2	chr11	103245841	103246947	+	850	intron (NM_016896, intron 1 of 15)	intron (NM_016896, intron 1 of 15)	21007	NM_016896	53859	Mm.158981	NM_016896	ENSMUSG00000020941	Map3k14	Nik|aly	mitogen-activated protein kinase kinase kinase 14	protein-coding
1422	chr2	69373710	69375130	+	849	Intergenic	(CAGAGA)n|Simple_repeat|Simple_repeat	-6042	NM_175512	241452	Mm.211655	NM_175512	ENSMUSG00000027068	Dhrs9	C730025I08Rik|Rdh15	dehydrogenase/reductase (SDR family) member 9	protein-coding
1485	chr15	83099363	83100846	+	848	promoter-TSS (NM_023475)	promoter-TSS (NM_023475)	-101	NM_023475	68607	Mm.30056	NM_023475	ENSMUSG00000058586	Serhl	0610008B10Rik|1110019M09Rik|AU019786	serine hydrolase-like	protein-coding
2177	chr19	47536184	47538359	+	848	promoter-TSS (NM_175360)	promoter-TSS (NM_175360)	-152	NM_175360	108689	Mm.218048	NM_175360	ENSMUSG00000042694	Stn1	0610009H20Rik|2310057J23Rik|AAF-44|AAF44|AI413458|Obfc1|RPA-32	STN1, CST complex subunit	protein-coding
1416-2	chr15	5115640	5117054	+	846	promoter-TSS (NM_026069)	promoter-TSS (NM_026069)	-266	NM_026069	67281	Mm.10474	NM_026069	ENSMUSG00000041841	Rpl37	3110005M08Rik	ribosomal protein L37	protein-coding
1373	chr10	59132504	59133875	+	845	intron (NM_172788, intron 9 of 9)	intron (NM_172788, intron 9 of 9)	88658	NM_001024911	103080	Mm.346842	NM_001024910	ENSMUSG00000019917	2020-09-10	4921515A04Rik|9430099J10Rik|AA408298|AI874685	septin 10	protein-coding
1122-4	chr15	85707681	85708801	+	844	TTS (NR_110483)	TTS (NR_110483)	922	NR_029727	387245		NR_029727	ENSMUSG00000065564	Mirlet7b	Mirnlet7b|let-7b|mmu-let-7b	microRNA let7b	ncRNA
1482-2	chr8	11554537	11556017	+	844	promoter-TSS (NM_001302457)	promoter-TSS (NM_001302457)	-485	NM_001302458	26356	Mm.25709	NM_011919	ENSMUSG00000045969	Ing1	2610028J21Rik|AA407184|AI875420|mING1h|p33Ing1|p37Ing1b	inhibitor of growth family, member 1	protein-coding
1435	chr15	39816526	39817959	+	844	intron (NM_001164466, intron 7 of 9)	intron (NM_001164466, intron 7 of 9)	20197	NR_045788	100503072	Mm.446661	NR_045788	ENSMUSG00000087695	Gm16291	-	predicted gene 16291	ncRNA
1306	chr12	8810729	8812033	+	843	Intergenic	Intergenic	39985	NM_011519	20969	Mm.2580	NM_011519	ENSMUSG00000020592	Sdc1	AA408134|AA409076|CD138|Sstn|Synd|Synd1|syn-1	syndecan 1	protein-coding
1136	chr1	144874255	144875389	+	842	Intergenic	(TTTG)n|Simple_repeat|Simple_repeat	-99395	NM_022881	64214	Mm.253927	NM_022881	ENSMUSG00000026357	Rgs18	-	regulator of G-protein signaling 18	protein-coding
1476	chr2	33101473	33102947	+	840	intron (NM_001355200, intron 2 of 29)	MLT1K|LTR|ERVL-MaLR	-14957	NM_178888	99326	Mm.41290	NM_178888	ENSMUSG00000038860	Garnl3	AW120551	GTPase activating RANGAP domain-like 3	protein-coding
1445-2	chr2	26391209	26392652	+	839	exon (NM_173180, exon 6 of 13)	exon (NM_173180, exon 6 of 13)	2582	NM_173180	66865	Mm.250359	NM_173180	ENSMUSG00000026926	Pmpca	1200002L24Rik|4933435E07Rik|Alpha-MPP|P-55	peptidase (mitochondrial processing) alpha	protein-coding
1530	chr15	5366480	5368008	+	839	Intergenic	L1_Mus1|LINE|L1	-123057	NM_008965	19219	Mm.18509	NM_008965	ENSMUSG00000039942	Ptger4	EP4|Ptgerep4	prostaglandin E receptor 4 (subtype EP4)	protein-coding
1535	chr10	111545281	111546814	+	838	Intergenic	Intergenic	39761	NM_009344	21664	Mm.3117	NM_009344	ENSMUSG00000020205	Phlda1	DT1P1B11|TDAG51|Tdag	pleckstrin homology like domain, family A, member 1	protein-coding
1258-3	chr4	139929297	139930553	+	838	intron (NR_045159, intron 2 of 2)	(CAG)n|Simple_repeat|Simple_repeat	3149	NR_045160	71235	Mm.61253	NR_045159	ENSMUSG00000085928	4933427I22Rik	-	RIKEN cDNA 4933427I22 gene	ncRNA
1073-4	chr7	83941130	83942201	+	838	intron (NM_030728, intron 27 of 28)	L2|LINE|L2	49665	NM_023403	67943	Mm.117365	NM_023403	ENSMUSG00000038503	Mesd	2210015O11Rik|AW537813|Mesdc2|mKIAA0081|mesd|msd	mesoderm development LRP chaperone	protein-coding
1229-4	chr17	6465304	6466531	+	837	Intergenic	Intergenic	-14923	NR_033520	547127	Mm.297552	NM_001045538		Tmem181b-ps	Tmem181b	transmembrane protein 181B, pseudogene	pseudo
1432	chr15	58997396	58998826	+	837	intron (NM_001146180, intron 3 of 13)	intron (NM_001146180, intron 3 of 13)	64310	NM_023172	66218	Mm.322294	NM_023172	ENSMUSG00000022354	Ndufb9	1190008J14Rik|CI-B22	NADH:ubiquinone oxidoreductase subunit B9	protein-coding
1524	chr7	114275213	114276735	+	837	intron (NM_011965, intron 1 of 9)	CpG	142	NM_011965	26440	Mm.121265	NM_011965	ENSMUSG00000030751	Psma1	C2|HC2|Pros-30|alpha-type	proteasome (prosome, macropain) subunit, alpha type 1	protein-coding
2046	chr1	152021390	152023434	+	837	intron (NM_197990, intron 1 of 5)	intron (NM_197990, intron 1 of 5)	67908	NM_197990	69399	Mm.278031	NM_197990	ENSMUSG00000032666	1700025G04Rik	2610510E02Rik|2900042O04Rik	RIKEN cDNA 1700025G04 gene	protein-coding
1306-2	chr15	59599069	59600373	+	835	intron (NM_026746, intron 6 of 6)	L2b|LINE|L2	-48933	NM_144549	211770	Mm.40298	NM_144549	ENSMUSG00000032501	Trib1	A530090O15Rik|TRB-1|Trb1	tribbles pseudokinase 1	protein-coding
1477	chr2	167876462	167877937	+	834	Intergenic	Intergenic	-55128	NM_011201	19246	Mm.277916	NM_011201	ENSMUSG00000027540	Ptpn1	PTP-1B|PTP-HA2|PTP1B	protein tyrosine phosphatase, non-receptor type 1	protein-coding
1751	chr1	119989738	119991487	+	833	intron (NM_001115074, intron 2 of 23)	(CTG)n|Simple_repeat|Simple_repeat	6620	NM_001115074	226356	Mm.297290	NM_001115074	ENSMUSG00000036962	Cfap221	Gm101|Pcdp1	cilia and flagella associated protein 221	protein-coding
1555	chr16	93308491	93310044	+	833	Intergenic	(CCCA)n|Simple_repeat|Simple_repeat	43922	NR_040486	69857	Mm.81192	NR_040486	ENSMUSG00000100277	1810053B23Rik	1810008L18Rik|1810056K14Rik	RIKEN cDNA 1810053B23 gene	ncRNA
1417-2	chr12	100527639	100529054	+	832	Intergenic	Intergenic	-7524	NM_001033213	104718	Mm.295441	NM_001033213	ENSMUSG00000033530	Ttc7b	AA408451|Ttc7l1	tetratricopeptide repeat domain 7B	protein-coding
1919	chr6	87456768	87458685	+	832	TTS (NR_104483)	TTS (NR_104483)	28732	NM_009756	12154	Mm.483321	NM_009756	ENSMUSG00000030046	Bmp10	b2b2711Clo	bone morphogenetic protein 10	protein-coding
1253-2	chr2	12263824	12265075	+	831	intron (NM_001001309, intron 3 of 29)	SUBTEL_sa|Satellite|Satellite	-36797	NR_040353	338535	Mm.483275	NR_040353	ENSMUSG00000086843	E030013I19Rik	-	RIKEN cDNA E030013I19 gene	ncRNA
1246-2	chr15	88843212	88844456	+	831	Intergenic	G-rich|Low_complexity|Low_complexity	-18360	NM_145478	223775	Mm.400129	NM_145478	ENSMUSG00000035828	Pim3	BC026639|Kid1	proviral integration site 3	protein-coding
1091-2	chr10	13634429	13635518	+	831	Intergenic	RMER4B|LTR|ERVK	-81831	NM_019961	56535	Mm.282711	NM_019961	ENSMUSG00000019809	Pex3	1700014F15Rik|2810027F19Rik|2900010N04Rik	peroxisomal biogenesis factor 3	protein-coding
1446-2	chr4	123753184	123754628	+	830	Intergenic	Intergenic	-3607	NM_023423	68050	Mm.27903	NM_023423	ENSMUSG00000023075	Akirin1	6330407G11Rik	akirin 1	protein-coding
1217-2	chr11	76493778	76494993	+	825	exon (NM_001346670, exon 1 of 22)	exon (NM_001346670, exon 1 of 22)	110	NM_001346670	109934	Mm.258939	NM_198018	ENSMUSG00000017631	Abr	-	active BCR-related gene	protein-coding
1228-3	chr19	56125508	56126734	+	823	Intergenic	Intergenic	-161791	NM_001329936	226243	Mm.25791	NM_146101	ENSMUSG00000025075	Habp2	AI035669|FSAP|HABP|HGFAL|PHBP	hyaluronic acid binding protein 2	protein-coding
1347	chr10	127289224	127290569	+	819	promoter-TSS (NM_007837)	promoter-TSS (NM_007837)	-878	NM_033072	110962	Mm.372826	NM_033072	ENSMUSG00000025409	Mbd6	D10Wsu93e	methyl-CpG binding domain protein 6	protein-coding
1037-5	chr7	144581728	144582763	+	819	exon (NM_010175, exon 1 of 2)	exon (NM_010175, exon 1 of 2)	196	NM_010175	14082	Mm.5126	NM_010175	ENSMUSG00000031077	Fadd	Mort1/FADD	Fas (TNFRSF6)-associated via death domain	protein-coding
1453-2	chr12	69754138	69755589	+	819	intron (NM_183294, intron 6 of 9)	(CAGAGA)n|Simple_repeat|Simple_repeat	9081	NR_030450	751538		NR_030450	ENSMUSG00000076065	Mir681	Mirn681|mmu-mir-681	microRNA 681	ncRNA
1446-3	chr9	107947206	107948650	+	817	exon (NM_145621, exon 11 of 11)	exon (NM_145621, exon 11 of 11)	-3035	NM_011634	22036	Mm.297870	NM_011634	ENSMUSG00000032586	Traip	Trip	TRAF-interacting protein	protein-coding
1530-2	chr16	87634064	87635592	+	817	Intergenic	(CAGC)n|Simple_repeat|Simple_repeat	-64126	NM_007520	12013	Mm.26147	NM_007520	ENSMUSG00000025612	Bach1	6230421P05Rik|AI323795	BTB and CNC homology 1, basic leucine zipper transcription factor 1	protein-coding
1807	chr11	4894514	4896319	+	816	promoter-TSS (NM_172438)	promoter-TSS (NM_172438)	73	NM_172438	107829	Mm.28969	NM_172438	ENSMUSG00000034274	Thoc5	1700060C24Rik|A430085L24Rik|Fmip|PK1.3|Sgk2	THO complex 5	protein-coding
1396-2	chr15	82353561	82354955	+	815	promoter-TSS (NM_025987)	promoter-TSS (NM_025987)	33	NM_025987	67130	Mm.27570	NM_025987	ENSMUSG00000022450	Ndufa6	14kDa|2700038D15Rik|B230217P19Rik	NADH:ubiquinone oxidoreductase subunit A6	protein-coding
1508-2	chrX	169878765	169880271	+	814	promoter-TSS (NM_001290506)	promoter-TSS (NM_001290506)	-101	NM_001290506	17318	Mm.34441	NM_010797	ENSMUSG00000035299	Mid1	61B3-R|DXHXS1141|Fxy|Trim18	midline 1	protein-coding
1352-2	chr10	111506506	111507856	+	813	exon (NM_009344, exon 1 of 2)	exon (NM_009344, exon 1 of 2)	895	NM_009344	21664	Mm.3117	NM_009344	ENSMUSG00000020205	Phlda1	DT1P1B11|TDAG51|Tdag	pleckstrin homology like domain, family A, member 1	protein-coding
1635	chr12	81788125	81789758	+	812	Intergenic	Intergenic	-7771	NM_001174107	338372	Mm.35284	NM_177395	ENSMUSG00000042724	Map3k9	E130314H24Rik|Mlk1|Prke1	mitogen-activated protein kinase kinase kinase 9	protein-coding
1346-4	chrX	170836448	170837792	+	810	Intergenic	Intergenic	164476	NM_001199212	107626	Mm.486144	NM_001199212	ENSMUSG00000093806	Asmt	Hiomt	acetylserotonin O-methyltransferase	protein-coding
1479	chr11	117451006	117452483	+	810	Intergenic	Intergenic	-30027	NR_136918	667423	Mm.383716	NR_136918	ENSMUSG00000083705	Gm8624	EG667423|EyeLinc11	ribosomal protein S23 pseudogene	pseudo
1446	chr19	23134006	23135450	+	806	Intergenic	Intergenic	-6498	NM_010638	16601	Mm.291595	NM_010638	ENSMUSG00000033863	Klf9	2310051E17Rik|AA589643|BTEB-1|Bteb1|Gm9971	Kruppel-like factor 9	protein-coding
1460	chr19	44387792	44389250	+	805	Intergenic	Intergenic	19188	NM_009127	20249	Mm.267377	NM_009127	ENSMUSG00000037071	Scd1	AA589638|AI265570|Scd|Scd-1|ab	stearoyl-Coenzyme A desaturase 1	protein-coding
1272	chr10	79639614	79640884	+	803	exon (NM_001033473, exon 4 of 4)	exon (NM_001033473, exon 4 of 4)	-2331	NM_001024539	216148	Mm.39424	NM_001024539	ENSMUSG00000020312	Shc2	6720466E06|SCK|ShcB|Sli	SHC (Src homology 2 domain containing) transforming protein 2	protein-coding
1265-2	chr11	79181628	79182891	+	803	Intergenic	PB1D10|SINE|Alu	-35786	NM_013571	16706	Mm.4745	NM_013571	ENSMUSG00000018334	Ksr1	AW492498|B-KSR1|D11Bhm183e|D11Bhm184e|Ksr|RSU2|hb|mKSR1	kinase suppressor of ras 1	protein-coding
1435-3	chr4	105215132	105216565	+	801	intron (NM_080555, intron 4 of 5)	intron (NM_080555, intron 4 of 5)	58501	NM_080555	67916	Mm.348326	NM_080555	ENSMUSG00000028517	Plpp3	1110003O22Rik|2610002D05Rik|AV025606|D4Bwg0538e|D4Bwg1535e|Lpp3|PRG-2|Ppab2b|Ppap2b	phospholipid phosphatase 3	protein-coding
1507	chr19	40894018	40895523	+	800	promoter-TSS (NM_028319)	promoter-TSS (NM_028319)	65	NM_028319	72672	Mm.313523	NM_028319	ENSMUSG00000049164	Zfp518a	2810401C22Rik|6330417C12Rik|AI426493|Zfp518|Znf518|Znf518a|mKIAA0335	zinc finger protein 518A	protein-coding
1436-2	chr10	80556684	80558118	+	800	intron (NM_025852, intron 1 of 14)	intron (NM_025852, intron 1 of 14)	4159	NM_025852	66932	Mm.1116	NM_025852	ENSMUSG00000047417	Rexo1	1700021P10Rik|2610511M11Rik|AW050347|EloA-BP1|Rex1|Tceb3bp1	REX1, RNA exonuclease 1	protein-coding
1389	chr11	120466710	120468097	+	798	promoter-TSS (NM_008244)	promoter-TSS (NM_008244)	197	NM_197995	70317	Mm.485046	NM_197995	ENSMUSG00000057594	Arl16	2600005N12Rik	ADP-ribosylation factor-like 16	protein-coding
1186-4	chr4	48134823	48136007	+	796	intron (NM_026343, intron 2 of 7)	intron (NM_026343, intron 2 of 7)	10496	NM_026343	67727	Mm.171334	NM_026343	ENSMUSG00000061455	Stx17	4833418L03Rik|6330411F21Rik|9030425C21Rik|AW048351	syntaxin 17	protein-coding
1167	chr17	63482481	63483646	+	795	intron (NM_015794, intron 3 of 8)	intron (NM_015794, intron 3 of 8)	17517	NM_015794	50758	Mm.136366	NM_015794	ENSMUSG00000023965	Fbxl17	6330576B01Rik|AI452053|BB073797|C130023C01Rik|Fbx13|Fbxo13	F-box and leucine-rich repeat protein 17	protein-coding
1363	chr8	120611840	120613201	+	794	intron (NM_197988, intron 2 of 3)	intron (NM_197988, intron 2 of 3)	21870	NM_197988	68918	Mm.473736	NM_197988	ENSMUSG00000043687	1190005I06Rik	-	RIKEN cDNA 1190005I06 gene	protein-coding
1228-5	chr2	173434492	173435718	+	793	Intergenic	Intergenic	-87487	NM_028158	72221	Mm.46132	NM_028158	ENSMUSG00000027518	1700021F07Rik	-	RIKEN cDNA 1700021F07 gene	protein-coding
1430	chr19	3986162	3987590	+	793	5' UTR (NM_001302480, exon 2 of 8)	5' UTR (NM_001302480, exon 2 of 8)	306	NM_001302482	71670	Mm.29735	NM_027857	ENSMUSG00000024866	Acy3	0610006H10Rik|AA3|AAIII|AW107362|Acy-3|HCBP1	aspartoacylase (aminoacylase) 3	protein-coding
1424	chr12	3365442	3366864	+	792	exon (NM_008445, exon 1 of 8)	exon (NM_008445, exon 1 of 8)	1021	NM_008445	16570	Mm.7688	NM_008445	ENSMUSG00000020668	Kif3c	mKIAA4058	kinesin family member 3C	protein-coding
1518-2	chr15	80254948	80256464	+	789	intron (NM_001287180, intron 2 of 3)	CpG	522	NM_009716	11911	Mm.641	NM_009716	ENSMUSG00000042406	Atf4	Atf-4|C/ATF|CREB2|TAXREB67	activating transcription factor 4	protein-coding
1270-3	chr17	70989936	70991204	+	789	promoter-TSS (NM_023402)	promoter-TSS (NM_023402)	-54	NM_023402	67938	Mm.261329	NM_023402	ENSMUSG00000034868	Myl12b	1500001M02Rik|C77744|Mylc2b|RLC-B	myosin, light chain 12B, regulatory	protein-coding
1796-2	chr17	29092895	29094689	+	788	promoter-TSS (NM_007669)	promoter-TSS (NM_007669)	23	NM_007669	12575	Mm.195663	NM_007669	ENSMUSG00000023067	Cdkn1a	CAP20|CDKI|CIP1|Cdkn1|P21|SDI1|Waf1|mda6|p21Cip1|p21WAF	cyclin-dependent kinase inhibitor 1A (P21)	protein-coding
1209-3	chr2	13410114	13411321	+	788	intron (NM_001081084, intron 27 of 66)	intron (NM_001081084, intron 27 of 66)	81159	NM_001081084	65969	Mm.313915	NM_001081084	ENSMUSG00000026726	Cubn	AA408369|AL022750|D2Wsu88e	cubilin (intrinsic factor-cobalamin receptor)	protein-coding
1834	chr8	86470891	86472723	+	787	Intergenic	Intergenic	94783	NM_172912	244562	Mm.67485	NM_172912	ENSMUSG00000036872	Abcc12	4930467B22Rik|MRP9	ATP-binding cassette, sub-family C (CFTR/MRP), member 12	protein-coding
1263	chr1	179876200	179877461	+	787	Intergenic	Intergenic	-72815	NM_026375	226747	Mm.128165	NM_026375	ENSMUSG00000026491	Ahctf1	6230412P20Rik|AV011447|Elys	AT hook containing transcription factor 1	protein-coding
1435-2	chr15	75048120	75049553	+	787	promoter-TSS (NM_010741)	promoter-TSS (NM_010741)	1	NM_001252057	17067	Mm.1583	NM_010741	ENSMUSG00000079018	Ly6c1	AA682074|AA959465|Ly-6C|Ly-6C1|Ly6c	lymphocyte antigen 6 complex, locus C1	protein-coding
1360	chr1	74012010	74013368	+	786	intron (NM_027884, intron 4 of 34)	Tigger7|DNA|TcMar-Tigger	111859	NM_027884	21961	Mm.309975	NM_027884	ENSMUSG00000055322	Tns1	1110018I21Rik|1200014E20Rik|AI648117|E030018G17Rik|E030037J05Rik|Tns	tensin 1	protein-coding
1332-5	chr6	135064733	135066063	+	786	promoter-TSS (NM_181444)	promoter-TSS (NM_181444)	-264	NM_181444	232431	Mm.23575	NM_181444	ENSMUSG00000046733	Gprc5a	Rai3|Raig1	G protein-coupled receptor, family C, group 5, member A	protein-coding
1374-2	chr13	13574957	13576329	+	786	Intergenic	(CACG)n|Simple_repeat|Simple_repeat	-14766	NM_010748	17101	Mm.342337	NM_010748	ENSMUSG00000019726	Lyst	D13Sfk13|beige|bg	lysosomal trafficking regulator	protein-coding
1467	chr2	131509086	131510551	+	785	intron (NM_001177838, intron 1 of 4)	intron (NM_001177838, intron 1 of 4)	17956	NM_001177838	228608	Mm.136586	NM_145533	ENSMUSG00000027333	Smox	B130066H01Rik|PAO|PAOh1|SMO	spermine oxidase	protein-coding
1332-4	chr2	132075691	132077021	+	785	intron (NM_001355431, intron 6 of 6)	intron (NM_001355431, intron 6 of 6)	-46032	NM_001362866	215653	Mm.204737	NM_175445	ENSMUSG00000027339	Rassf2	3830431H01Rik|9030412M04Rik|AI852669|AW495050	Ras association (RalGDS/AF-6) domain family member 2	protein-coding
1398-2	chr4	135272426	135273822	+	784	promoter-TSS (NM_013885)	promoter-TSS (NM_013885)	-364	NM_013885	29876	Mm.257765	NM_013885	ENSMUSG00000037242	Clic4	D0Jmb3|TU-74|mc3s5|mtCLIC	chloride intracellular channel 4 (mitochondrial)	protein-coding
1308-2	chr2	122117644	122118950	+	783	promoter-TSS (NM_145531)	promoter-TSS (NM_145531)	89	NM_145531	214585	Mm.222303	NM_145531	ENSMUSG00000033396	Spg11	6030465E24Rik|A330015I11|C530005A01Rik	SPG11, spatacsin vesicle trafficking associated	protein-coding
1260	chr2	35336246	35337504	+	782	exon (NM_013515, exon 1 of 7)	exon (NM_013515, exon 1 of 7)	134	NM_013515	13830	Mm.295284	NM_013515	ENSMUSG00000026880	Stom	Epb7.2	stomatin	protein-coding
1169-10	chr6	47685334	47686501	+	781	promoter-TSS (NR_002841)	promoter-TSS (NR_002841)	-541	NR_002841	19799		NR_002841		Rn4.5s	-	4.5S RNA	rRNA
1318-2	chr12	54713841	54715157	+	780	Intergenic	Intergenic	-18605	NM_025456	66266	Mm.156440	NM_025456	ENSMUSG00000054302	Eapp	1810011O16Rik	E2F-associated phosphoprotein	protein-coding
1480	chr15	77884689	77886167	+	778	Intergenic	Intergenic	-43253	NM_022410	17886	Mm.29677	NM_022410	ENSMUSG00000022443	Myh9	Fltn|Myhn-1|Myhn1|NMHCIIA|NMMHC-A|NMMHC-IIA|TU72.6	myosin, heavy polypeptide 9, non-muscle	protein-coding
1243	chr11	77894447	77895688	+	778	Intergenic	MLT1H1|LTR|ERVL-MaLR	-1195	NM_008952	19193	Mm.8543	NM_008952	ENSMUSG00000017453	Pipox	LPIPOX|Pso	pipecolic acid oxidase	protein-coding
1069-4	chr9	106646161	106647228	+	777	intron (NM_001160353, intron 4 of 5)	intron (NM_001160353, intron 4 of 5)	9415	NM_001160353	108068	Mm.410822	NM_001160353	ENSMUSG00000023192	Grm2	4930441L02Rik|Gprc1b|mGluR2|mGluR7	glutamate receptor, metabotropic 2	protein-coding
1341	chr1	91413453	91414792	+	776	promoter-TSS (NM_001360899)	promoter-TSS (NM_001360899)	-84	NM_001360900	55927	Mm.280029	NM_019479	ENSMUSG00000067071	Hes6	AI326893|bHLHb41	hairy and enhancer of split 6	protein-coding
1146-3	chr11	73198404	73199548	+	774	promoter-TSS (NM_001357892)	promoter-TSS (NM_001357892)	43	NM_031251	83429	Mm.259852	NM_031251	ENSMUSG00000005949	Ctns	AI195360|AW049661	cystinosis, nephropathic	protein-coding
1425-3	chr3	102663018	102664441	+	774	Intergenic	Intergenic	-71041	NM_027533	70747	Mm.27469	NM_027533	ENSMUSG00000027858	Tspan2	6330415F13Rik|B230119D02Rik|tspan-2	tetraspanin 2	protein-coding
1348	chr3	90602067	90603413	+	773	TTS (NM_001355597)	TTS (NM_001355597)	-1030	NM_011311	20198	Mm.3925	NM_011311	ENSMUSG00000001020	S100a4	18A2|42a|Capl|FSp1|Mts1|PeL98|metastasin|pk9a	S100 calcium binding protein A4	protein-coding
1001-2	chr15	78401259	78402258	+	772	intron (NM_009437, intron 1 of 1)	intron (NM_009437, intron 1 of 1)	4107	NM_009437	22117	Mm.15312	NM_009437	ENSMUSG00000044986	Tst	rhodanese	thiosulfate sulfurtransferase, mitochondrial	protein-coding
1088-2	chr17	69238423	69239509	+	772	intron (NM_001355734, intron 4 of 22)	intron (NM_001355734, intron 4 of 22)	38240	NR_045428	69750	Mm.439063	NR_045428	ENSMUSG00000100572	2410021H03Rik	-	RIKEN cDNA 2410021H03 gene	ncRNA
1438-2	chr12	76134543	76135979	+	771	intron (NR_104386, intron 5 of 7)	intron (NR_104386, intron 5 of 7)	41998	NM_010157	13983	Mm.2561	NM_010157	ENSMUSG00000021055	Esr2	ER[b]|ERbeta|Estrb	estrogen receptor 2 (beta)	protein-coding
1232-2	chr11	68713695	68714925	+	771	intron (NM_175260, intron 2 of 40)	PB1D7|SINE|Alu	22395	NM_175260	77579	Mm.218233	NM_175260	ENSMUSG00000020900	Myh10	5730504C04Rik|9330167F11Rik|Fltn|Myhn-2|Myhn2|NMHC II-B|NMHC-B|NMHCII-B|NMMHC II-b|NMMHC-B|NMMHC-IIB|SMemb|mKIAA3005	myosin, heavy polypeptide 10, non-muscle	protein-coding
1136-3	chr17	89190324	89191458	+	771	intron (NM_013523, intron 1 of 9)	(TGG)n|Simple_repeat|Simple_repeat	9784	NM_013523	14309	Mm.57155	NM_013523	ENSMUSG00000032937	Fshr	-	follicle stimulating hormone receptor	protein-coding
1496	chr15	83267133	83268627	+	771	Intergenic	Intergenic	-16151	NM_001170954	239559	Mm.323805	NM_001004150	ENSMUSG00000047878	A4galt	-	alpha 1,4-galactosyltransferase	protein-coding
1375-3	chr18	82952234	82953607	+	770	intron (NM_001177464, intron 1 of 5)	C-rich|Low_complexity|Low_complexity	-32360	NR_033307	75853	Mm.420737	NR_033307	ENSMUSG00000118339	4930592I03Rik	-	RIKEN cDNA 4930592I03 gene	ncRNA
1107-12	chr8	121124880	121125985	+	769	Intergenic	CpG	-2253	NM_008024	14241	Mm.5111	NM_008024	ENSMUSG00000097084	Foxl1	FREAC7|Fkh6|fkh-6	forkhead box L1	protein-coding
1475	chr16	44557926	44559399	+	769	promoter-TSS (NR_037242)	promoter-TSS (NR_037242)	208	NM_172506	117606	Mm.41561	NM_172506	ENSMUSG00000022687	Boc	4732455C11|mFLJ00376	biregional cell adhesion molecule-related/down-regulated by oncogenes (Cdon) binding protein	protein-coding
1228-7	chrX	32157892	32159118	+	768	Intergenic	Intergenic	-119889	NM_001168334	100040482	Mm.479861	NM_001168334	ENSMUSG00000096194	Btbd35f2	Gm2799	BTB domain containing 35, family member 2	protein-coding
1065-3	chr3	51408316	51409379	+	767	intron (NM_025523, intron 1 of 3)	CpG	108	NM_025523	66377	Mm.331007	NM_025523	ENSMUSG00000037152	Ndufc1	2310016K22Rik|KFYI	NADH:ubiquinone oxidoreductase subunit C1	protein-coding
1381-3	chr6	4314179	4315558	+	767	Intergenic	ERVB4_1B-LTR_MM|LTR|ERVK	-190750	NM_007743	12843	Mm.277792	NM_007743	ENSMUSG00000029661	Col1a2	AA960264|AI325291|Col1a-2|Cola-2|Cola2|oim	collagen, type I, alpha 2	protein-coding
1127-6	chr7	16387074	16388199	+	766	intron (NM_019748, intron 1 of 8)	CpG	260	NM_001285892	56459	Mm.258530	NM_019748	ENSMUSG00000052833	Sae1	2400010M20Rik|2610044L12Rik|AL033372|AOS1|AW743391|D7Ertd177e|HSPC140|Sua1|Uble1a	SUMO1 activating enzyme subunit 1	protein-coding
1515-2	chr2	30463483	30464996	+	766	Intergenic	Intergenic	9960	NM_030244	72500	Mm.295464	NM_030244	ENSMUSG00000089762	Ier5l	2610524G09Rik	immediate early response 5-like	protein-coding
1493	chr1	191167350	191168841	+	765	Intergenic	(TGG)n|Simple_repeat|Simple_repeat	-3278	NM_001109759	619288	Mm.61148	NM_001109759	ENSMUSG00000091017	Fam71a	4933417M04Rik|GARI-L4	family with sequence similarity 71, member A	protein-coding
1083	chr6	145807633	145808714	+	765	intron (NM_027760, intron 1 of 4)	intron (NM_027760, intron 1 of 4)	57247	NM_024469	79362	Mm.154529	NM_024469	ENSMUSG00000030256	Bhlhe41	6430520M22Rik|Bhlhb2l|Bhlhb3|DEC2|Sharp1	basic helix-loop-helix family, member e41	protein-coding
1226-5	chr7	100987528	100988752	+	765	Intergenic	Intergenic	-23774	NM_183168	233571	Mm.235193	NM_183168	ENSMUSG00000048779	P2ry6	2010204J23Rik|P2Y6	pyrimidinergic receptor P2Y, G-protein coupled, 6	protein-coding
1498	chr1	119151206	119152702	+	765	Intergenic	ID_B1|SINE|B4	-98335	NM_001081125	14633	Mm.273292	NM_001081125	ENSMUSG00000048402	Gli2	-	GLI-Kruppel family member GLI2	protein-coding
1239-3	chr7	4943144	4944381	+	765	exon (NM_173008, exon 14 of 14)	exon (NM_173008, exon 14 of 14)	17941	NM_173008	269855	Mm.44190	NM_173008	ENSMUSG00000035279	Ssc5d	A430110N23Rik|S5D-SRCRB	scavenger receptor cysteine rich family, 5 domains	protein-coding
1013-2	chr18	36559647	36560658	+	765	promoter-TSS (NM_175375)	promoter-TSS (NM_175375)	-451	NM_175375	108857	Mm.482287	NM_175375	ENSMUSG00000024483	Ankhd1	1110004O12Rik|4933432B13Rik|9130019P20Rik|A530027J04Rik|A630021B20Rik|AA571404|Mask|mFLJ00246|mKIAA1085	ankyrin repeat and KH domain containing 1	protein-coding
1482	chr3	37099808	37101288	+	765	intron (NM_009350, intron 10 of 11)	MusHAL1|LINE|L1	25406	NM_008366	16183	Mm.14190	NM_008366	ENSMUSG00000027720	Il2	Il-2	interleukin 2	protein-coding
1553	chr6	72826898	72828449	+	764	Intergenic	Intergenic	-38628	NM_009332	21415	Mm.440067	NM_009332	ENSMUSG00000055799	Tcf7l1	Tcf-3|Tcf3|bHLHb21	transcription factor 7 like 1 (T cell specific, HMG box)	protein-coding
1298-2	chr15	3457219	3458515	+	764	intron (NM_001048178, intron 2 of 8)	intron (NM_001048178, intron 2 of 8)	123975	NM_001286370	14600	Mm.3986	NM_010284	ENSMUSG00000055737	Ghr	GHBP|GHR/BP	growth hormone receptor	protein-coding
1970	chr11	107783683	107785651	+	764	intron (NM_019431, intron 1 of 3)	(TAGG)n|Simple_repeat|Simple_repeat	10039	NM_019431	54377	Mm.103724	NM_019431	ENSMUSG00000020723	Cacng4	AI413107|AW491861	calcium channel, voltage-dependent, gamma subunit 4	protein-coding
1075-2	chr10	126946813	126947886	+	763	Intergenic	RMER17B|LTR|ERVK	-10674	NR_155763	102632477	Mm.406773	NR_155763		Gm30539	-	predicted gene, 30539	ncRNA
1169-8	chr4	149444702	149445869	+	762	Intergenic	CpG	9683	NM_022020	63954	Mm.46023	NM_022020	ENSMUSG00000028996	Rbp7	1110002J23Rik|CRBP-III	retinol binding protein 7, cellular	protein-coding
1040-2	chr11	115748774	115749812	+	762	Intergenic	Intergenic	-16140	NM_028014	71947	Mm.23168	NM_028014	ENSMUSG00000020747	Tmem94	2310067B10Rik|Kiaa0195|mKIAA0195	transmembrane protein 94	protein-coding
1152-2	chr11	115473262	115474412	+	762	3' UTR (NM_001359606, exon 4 of 4)	3' UTR (NM_001359606, exon 4 of 4)	-1830	NM_177778	276905	Mm.38019	NM_177778	ENSMUSG00000057219	Armc7	A630084C13|BC023126	armadillo repeat containing 7	protein-coding
1105-5	chr14	70161798	70162901	+	759	Intergenic	Intergenic	-2847	NM_001004155	268759	Mm.12148	NM_001004155	ENSMUSG00000044551	9930012K11Rik	-	RIKEN cDNA 9930012K11 gene	protein-coding
1468	chr12	86117320	86118786	+	759	intron (NM_029601, intron 3 of 7)	intron (NM_029601, intron 3 of 7)	35492	NM_001199843	76411	Mm.292345	NM_029601	ENSMUSG00000007867	Ift43	1700019E19Rik|R75064	intraflagellar transport 43	protein-coding
1130-3	chr15	84190318	84191446	+	759	Intergenic	Intergenic	-1358	NM_178614	68653	Mm.290725	NM_178614	ENSMUSG00000022437	Samm50	1110030L07Rik	SAMM50 sorting and assembly machinery component	protein-coding
1248-8	chr5	113483741	113484987	+	758	Intergenic	Intergenic	-66056	NM_177292	320916	Mm.102783	NM_177292	ENSMUSG00000063430	Wscd2	4933413A10Rik|C530024P05Rik|Gm450	WSC domain containing 2	protein-coding
1272-7	chr7	30649499	30650769	+	758	promoter-TSS (NM_133693)	promoter-TSS (NM_133693)	94	NM_133693	68035	Mm.401747	NM_133693	ENSMUSG00000036733	Rbm42	1700003D06Rik|3100004P22Rik	RNA binding motif protein 42	protein-coding
1300	chr11	103132201	103133499	+	758	promoter-TSS (NM_027658)	promoter-TSS (NM_027658)	-489	NM_001130516	71059	Mm.273871	NM_027658	ENSMUSG00000043372	Hexim2	4933402L21Rik	hexamethylene bis-acetamide inducible 2	protein-coding
1375-2	chr11	109985742	109987115	+	758	intron (NM_001362749, intron 1 of 37)	(TG)n|Simple_repeat|Simple_repeat	9417	NM_001362749	27404	Mm.341004	NM_013851	ENSMUSG00000020620	Abca8b	Abca8	ATP-binding cassette, sub-family A (ABC1), member 8b	protein-coding
1444	chr15	25321133	25322575	+	758	Intergenic	Intergenic	91910	NM_027395	70350	Mm.29586	NM_027395	ENSMUSG00000045763	Basp1	2610024P12Rik|CAP-23|CAP23|Ckap3|NAP-22|NAP22	brain abundant, membrane attached signal protein 1	protein-coding
1355-2	chr3	27341797	27343150	+	757	Intergenic	Intergenic	25396	NM_009425	22035	Mm.1062	NM_009425	ENSMUSG00000039304	Tnfsf10	A330042I21Rik|AI448571|APO-2L|Ly81|TL2|Tnlg6a|Trail	tumor necrosis factor (ligand) superfamily, member 10	protein-coding
1169	chr10	127120485	127121652	+	757	promoter-TSS (NM_177614)	promoter-TSS (NM_177614)	92	NM_177614	216440	Mm.295246	NM_177614	ENSMUSG00000040462	Os9	4632413K17Rik|AU022351	amplified in osteosarcoma	protein-coding
1051	chr1	89804597	89805646	+	757	intron (NM_001037136, intron 12 of 16)	intron (NM_001037136, intron 12 of 16)	-121229	NR_015540	74403	Mm.444291	NR_015540		4933400F21Rik	1700091C04Rik|4930565K10Rik	RIKEN cDNA 4933400F21 gene	ncRNA
1578	chr2	167859880	167861456	+	757	Intergenic	Intergenic	-71659	NM_011201	19246	Mm.277916	NM_011201	ENSMUSG00000027540	Ptpn1	PTP-1B|PTP-HA2|PTP1B	protein tyrosine phosphatase, non-receptor type 1	protein-coding
1336	chr15	89125649	89126983	+	756	intron (NM_199198, intron 9 of 19)	intron (NM_199198, intron 9 of 19)	2384	NR_028448	170787	Mm.203954	NM_199198	ENSMUSG00000062906	Hdac10	AW548891|Hd10	histone deacetylase 10	protein-coding
1613	chr11	98681808	98683419	+	756	promoter-TSS (NM_009439)	promoter-TSS (NM_009439)	59	NM_009439	22123	Mm.12194	NM_009439	ENSMUSG00000017221	Psmd3	AI255837|AntP91a|D11Bwg1349e|Psd3|Tstap91a	proteasome (prosome, macropain) 26S subunit, non-ATPase, 3	protein-coding
1006-8	chr7	132286819	132287823	+	756	intron (NM_029935, intron 1 of 7)	intron (NM_029935, intron 1 of 7)	-28343	NR_028578	100043682	Mm.482794	NR_028578	ENSMUSG00000109270	Gm10584	-	predicted gene 10584	ncRNA
1176-6	chrX	74890645	74891819	+	756	Intergenic	Intergenic	54036	NM_001081670	546325	Mm.436644	NM_001081670	ENSMUSG00000079531	Gm5936	EG546325	predicted gene 5936	protein-coding
1421-2	chr16	57390639	57392058	+	755	intron (NM_001040397, intron 1 of 4)	LSU-rRNA_Hsa|rRNA|rRNA	38071	NM_001040397	78749	Mm.328360	NM_001040397	ENSMUSG00000043336	Filip1l	4631422O05Rik|Doc1	filamin A interacting protein 1-like	protein-coding
1417	chr1	41576758	41578173	+	755	Intergenic	(CAG)n|Simple_repeat|Simple_repeat	-396213	NR_040475	74897	Mm.243822	NR_040475	ENSMUSG00000104072	4930448I06Rik	-	RIKEN cDNA 4930448I06 gene	ncRNA
1300-3	chr18	82461639	82462937	+	754	Intergenic	(CAG)n|Simple_repeat|Simple_repeat	-12835	NM_001025245	17196	Mm.252063	NM_010777	ENSMUSG00000041607	Mbp	C76307|Hmbpr|R75289|golli-mbp|jve|mld|shi	myelin basic protein	protein-coding
1518	chr10	59702064	59703580	+	753	intron (NM_001359267, intron 1 of 11)	intron (NM_001359267, intron 1 of 11)	259	NM_144822	216001	Mm.27199	NM_144822	ENSMUSG00000020111	Micu1	C730016L05Rik|Calc|Cbara1	mitochondrial calcium uptake 1	protein-coding
1534-3	chr5	142431455	142432987	+	753	intron (NM_199068, intron 1 of 8)	C-rich|Low_complexity|Low_complexity	30724	NM_199068	17425	Mm.24214	NM_010812	ENSMUSG00000056493	Foxk1	A630048H08Rik|AI463295|Gm10868|Mnf	forkhead box K1	protein-coding
1280-5	chr18	24116280	24117558	+	753	intron (NM_172625, intron 1 of 4)	intron (NM_172625, intron 1 of 4)	4900	NM_172625	225280	Mm.258973	NM_172625	ENSMUSG00000047989	Ino80c	D030070L09Rik	INO80 complex subunit C	protein-coding
1405	chr6	51526293	51527696	+	753	intron (NM_001361581, intron 1 of 6)	(TG)n|Simple_repeat|Simple_repeat	2734	NM_001361580	71982	Mm.294166	NM_028035	ENSMUSG00000038301	Snx10	2410004M09Rik	sorting nexin 10	protein-coding
1557-2	chr3	89435999	89437554	+	753	promoter-TSS (NM_146131)	promoter-TSS (NM_146131)	72	NM_146131	229534	Mm.65906	NM_146131	ENSMUSG00000042613	Pbxip1	4732463H20Rik	pre B cell leukemia transcription factor interacting protein 1	protein-coding
2522	chr15	98844428	98846948	+	752	exon (NM_001033276, exon 40 of 55)	exon (NM_001033276, exon 40 of 55)	-14180	NM_016781	19082	Mm.6670	NM_016781	ENSMUSG00000067713	Prkag1	AA571379|BB036179|Prkaac	protein kinase, AMP-activated, gamma 1 non-catalytic subunit	protein-coding
1267-3	chr8	105325519	105326784	+	752	promoter-TSS (NM_025486)	promoter-TSS (NM_025486)	117	NM_001368409	234684	Mm.381717	NM_177449	ENSMUSG00000041679	Lrrc29	A630024J02Rik|FBL9|FBXL9	leucine rich repeat containing 29	protein-coding
1459	chr10	127744243	127745700	+	752	3' UTR (NM_198035, exon 2 of 2)	3' UTR (NM_198035, exon 2 of 2)	5441	NM_198035	320080	Mm.27258	NM_198035	ENSMUSG00000044617	Zbtb39	7030401O21Rik|mKIAA0352	zinc finger and BTB domain containing 39	protein-coding
1434-2	chr17	84073845	84075277	+	752	Intergenic	Intergenic	-4099	NR_045458	74473	Mm.399575	NR_045458	ENSMUSG00000117571	4933433H22Rik	-	RIKEN cDNA 4933433H22 gene	ncRNA
1272-5	chr2	91068061	91069331	+	752	exon (NM_026721, exon 2 of 10)	exon (NM_026721, exon 2 of 10)	1619	NM_026721	68427	Mm.192375	NM_026721	ENSMUSG00000002105	Slc39a13	1100001L14Rik|AA387663|ZIP-13|ZIP13	solute carrier family 39 (metal ion transporter), member 13	protein-coding
1320-2	chr17	84111555	84112873	+	751	Intergenic	Intergenic	33554	NR_045458	74473	Mm.399575	NR_045458	ENSMUSG00000117571	4933433H22Rik	-	RIKEN cDNA 4933433H22 gene	ncRNA
1297	chr4	57202129	57203424	+	751	intron (NM_011207, intron 22 of 25)	intron (NM_011207, intron 22 of 25)	30705	NR_040669	329851	Mm.392470	NR_040669	ENSMUSG00000085967	Gm12530	D730003B17	predicted gene 12530	ncRNA
1476-2	chr3	90586404	90587878	+	750	intron (NM_001355600, intron 1 of 2)	intron (NM_001355600, intron 1 of 2)	189	NM_001355600	20197	Mm.440044	NM_011310	ENSMUSG00000001021	S100a3	S100E	S100 calcium binding protein A3	protein-coding
1406	chr1	171101582	171102986	+	750	Intergenic	Intergenic	-19377	NM_001081275	75472	Mm.32760	NM_029301	ENSMUSG00000026649	Cfap126	1700009P17Rik|AV282292|Flattop|Fltp	cilia and flagella associated protein 126	protein-coding
1361-2	chr10	61447390	61448749	+	750	intron (NM_010124, intron 1 of 2)	intron (NM_010124, intron 1 of 2)	4600	NM_010124	13688	Mm.259516	NM_010124	ENSMUSG00000020091	Eif4ebp2	2810011I19Rik|4E-BP2|AA792569|BC010348|PHAS-II	eukaryotic translation initiation factor 4E binding protein 2	protein-coding
1378-3	chr13	55464736	55466112	+	750	intron (NM_001030296, intron 1 of 2)	intron (NM_001030296, intron 1 of 2)	1157	NM_001030296	432763	Mm.315457	NM_001030296	ENSMUSG00000034686	Prr7	XM_484263	proline rich 7 (synaptic)	protein-coding
1064-4	chrX	33778763	33779825	+	750	Intergenic	Intergenic	-76945	NM_001145038	100040732	Mm.465135	NM_001145038	ENSMUSG00000078324	Btbd35f14	Gm2933	BTB domain containing 35, family member 14	protein-coding
1278-2	chr6	89008191	89009467	+	749	Intergenic	Intergenic	-87281	NR_134978	232217	Mm.281744	NM_175017	ENSMUSG00000055403	4933427D06Rik	-	RIKEN cDNA 4933427D06 gene	ncRNA
2898-02-01	chr11	69661828	69664724	+	749	promoter-TSS (NM_011900)	promoter-TSS (NM_011900)	233	NR_035455	100316840		NR_035455	ENSMUSG00000088752	Mir1934	mir-1934|mmu-mir-1934	microRNA 1934	ncRNA
1312-2	chr15	102104388	102105698	+	749	intron (NM_001355636, intron 2 of 28)	CT-rich|Low_complexity|Low_complexity	2109	NM_153533	209039	Mm.29389	NM_153533	ENSMUSG00000037003	Tns2	C1-ten|Tenc1|nep|nph	tensin 2	protein-coding
1154-4	chr14	35691929	35693081	+	749	Intergenic	(GGGAGA)n|Simple_repeat|Simple_repeat	119473	NM_001033766	239036	Mm.239970	NM_001033766	ENSMUSG00000041068	4930596D02Rik	-	RIKEN cDNA 4930596D02 gene	protein-coding
1327-3	chr11	52000173	52001498	+	748	promoter-TSS (NM_009458)	promoter-TSS (NM_009458)	-49	NM_001362685	22210	Mm.384918	NM_009458	ENSMUSG00000020390	Ube2b	E2-14k|E214K|HR6B|Rad6b|mHR6B	ubiquitin-conjugating enzyme E2B	protein-coding
1154-5	chr15	40682296	40683448	+	748	intron (NM_001356998, intron 1 of 6)	intron (NM_001356998, intron 1 of 6)	27830	NM_011766	22762	Mm.39496	NM_011766	ENSMUSG00000022306	Zfpm2	B330005D23Rik|FOG-2|FOG2	zinc finger protein, multitype 2	protein-coding
1190-5	chr5	3364269	3365457	+	748	intron (NM_009873, intron 2 of 7)	intron (NM_009873, intron 2 of 7)	20970	NM_009873	12571	Mm.31672	NM_009873	ENSMUSG00000040274	Cdk6	AI504062|Crk2	cyclin-dependent kinase 6	protein-coding
1409	chr1	35964556	35965963	+	748	Intergenic	RMER4B|LTR|ERVK	-103141	NM_015818	50785	Mm.213566	NM_015818	ENSMUSG00000045216	Hs6st1	6Ost1	heparan sulfate 6-O-sulfotransferase 1	protein-coding
1508	chr16	17808693	17810199	+	748	Intergenic	Intergenic	12164	NM_153790	224024	Mm.194950	NM_153790	ENSMUSG00000012017	Scarf2	NSR1|SREC-II|SRECRP-1|Scatf1|Srec2|SrecII	scavenger receptor class F, member 2	protein-coding
1357	chr15	77910636	77911991	+	748	Intergenic	Intergenic	17681	NM_019913	56551	Mm.291917	NM_019913	ENSMUSG00000005354	Txn2	2510006J11Rik|AI788873|Trx2	thioredoxin 2	protein-coding
1397-2	chr7	128198842	128200237	+	747	intron (NM_001029872, intron 24 of 30)	(TCCTG)n|Simple_repeat|Simple_repeat	3789	NR_045183	70973	Mm.441564	NR_045183	ENSMUSG00000108354	4931431B13Rik	1700108I23Rik|AA536668	RIKEN cDNA 4931431B13 gene	ncRNA
1198	chr1	8863070	8864266	+	747	intron (NM_001290393, intron 3 of 19)	intron (NM_001290393, intron 3 of 19)	436209	NM_001290393	71096	Mm.336395	NM_027671	ENSMUSG00000025909	Sntg1	4933426D16Rik|G1SYN|SYN4	syntrophin, gamma 1	protein-coding
1464	chr15	39866428	39867890	+	747	Intergenic	Intergenic	-9689	NM_022722	64705	Mm.275974	NM_022722	ENSMUSG00000022304	Dpys	1200017I10Rik|1300004I01Rik|DHP|DHPase	dihydropyrimidinase	protein-coding
1365-2	chr3	137879241	137880604	+	747	intron (NM_001033155, intron 1 of 7)	(CTG)n|Simple_repeat|Simple_repeat	12247	NM_001033155	70604	Mm.256488	NM_001033155	ENSMUSG00000074212	Dnajb14	5730496F10Rik	DnaJ heat shock protein family (Hsp40) member B14	protein-coding
1549	chr3	96261933	96263480	+	747	TTS (NM_033596)	TTS (NM_033596)	611	NM_033596	97122	Mm.227295	NM_033596	ENSMUSG00000091405	Hist2h4	H4|X04652	histone cluster 2, H4	protein-coding
1236	chr16	23305506	23306740	+	747	intron (NM_001252506, intron 1 of 6)	intron (NM_001252506, intron 1 of 6)	15653	NM_001252506	20440	Mm.149029	NM_145933	ENSMUSG00000022885	St6gal1	AW742324|Siat1|St6Gal-I|St6gal|St6galI	beta galactoside alpha 2,6 sialyltransferase 1	protein-coding
1100-2	chr10	63381807	63382905	+	746	promoter-TSS (NM_001253685)	promoter-TSS (NM_001253685)	-87	NM_001253685	30045	Mm.32550	NM_013888	ENSMUSG00000036764	Dnajc12	Jdp1|mJDP1	DnaJ heat shock protein family (Hsp40) member C12	protein-coding
1393-2	chr17	31792506	31793897	+	745	Intergenic	B4|SINE|B4	62603	NM_010831	17691	Mm.290941	NM_010831	ENSMUSG00000024042	Sik1	Hrt-20|Msk|Sik|Sik-1|Snf1lk	salt inducible kinase 1	protein-coding
1285-5	chr18	42975203	42976486	+	745	intron (NM_028392, intron 1 of 8)	T-rich|Low_complexity|Low_complexity	-76338	NR_073583	72930	Mm.26134	NM_027531	ENSMUSG00000024500	Ppp2r2b	2900026H06Rik|6330404L05Rik|E130009M08Rik|PP2A-PR55B|PR55-BETA|SCA12	protein phosphatase 2, regulatory subunit B, beta	protein-coding
1127-4	chr4	45682626	45683751	+	744	promoter-TSS (NM_001033412)	promoter-TSS (NM_001033412)	-401	NM_001033412	329839	Mm.331582	NM_001033412		Gm829	-	predicted gene 829	protein-coding
1459-2	chr4	144891579	144893036	+	744	promoter-TSS (NM_001357275)	promoter-TSS (NM_001357275)	-520	NM_001172424	20148	Mm.14063	NM_011303	ENSMUSG00000066026	Dhrs3	Rsdr1|retSDR1	dehydrogenase/reductase (SDR family) member 3	protein-coding
1292	chr10	77115704	77116994	+	744	intron (NM_009929, intron 2 of 41)	intron (NM_009929, intron 2 of 41)	-2644	NM_001109991	12822	Mm.4352	NM_009929	ENSMUSG00000001435	Col18a1	-	collagen, type XVIII, alpha 1	protein-coding
1471	chr2	143062368	143063837	+	744	promoter-TSS (NM_021335)	promoter-TSS (NM_021335)	33	NM_021335	20639	Mm.1323	NM_021335	ENSMUSG00000008333	Snrpb2	2810052G09Rik	U2 small nuclear ribonucleoprotein B	protein-coding
3338	chr11	6709289	6712625	+	744	Intergenic	Intergenic	9080	NR_046025	626419	Mm.390334	NR_046025	ENSMUSG00000086808	Gm11981	-	predicted gene 11981	ncRNA
1109-2	chr15	95638601	95639708	+	744	intron (NM_207533, intron 2 of 3)	intron (NM_207533, intron 2 of 3)	15617	NM_207533	223843	Mm.152937	NM_207533	ENSMUSG00000045608	Dbx2	9430056A22Rik|9630005K15|AI846217|Gm1229	developing brain homeobox 2	protein-coding
1182-4	chr2	32961023	32962203	+	743	promoter-TSS (NM_009076)	promoter-TSS (NM_009076)	-99	NM_009076	269261	Mm.250030	NM_009076	ENSMUSG00000038900	Rpl12	E430018F03	ribosomal protein L12	protein-coding
1213-2	chr1	90775454	90776665	+	743	exon (NM_001243009, exon 37 of 41)	exon (NM_001243009, exon 37 of 41)	67912	NM_001243008	12835	Mm.7562	NM_009935	ENSMUSG00000048126	Col6a3	AI507288|Col6a-3	collagen, type VI, alpha 3	protein-coding
1220-3	chr3	35225007	35226225	+	742	Intergenic	Intergenic	-302965	NR_105799	102466155		NR_105799	ENSMUSG00000098862	Mir6378	Gm27706|mmu-mir-6378	microRNA 6378	ncRNA
992-2	chr6	128029459	128030449	+	742	intron (NM_175414, intron 3 of 8)	intron (NM_175414, intron 3 of 8)	113624	NM_175414	109246	Mm.21814	NM_175414	ENSMUSG00000030352	Tspan9	6720474K14Rik|9430079M16Rik|AU018597|Tspan-9	tetraspanin 9	protein-coding
1504	chr17	80595941	80597443	+	742	intron (NM_001290345, intron 29 of 33)	intron (NM_001290345, intron 29 of 33)	-18879	NM_001360144	381113	Mm.329216	NM_001033443	ENSMUSG00000033966	Cdkl4	AU067824|Gm942	cyclin-dependent kinase-like 4	protein-coding
1330	chr11	117926215	117927543	+	742	Intergenic	Intergenic	42487	NM_007707	12702	Mm.3468	NM_007707	ENSMUSG00000053113	Socs3	Cis3|Cish3|EF-10|Ef10|SSI-3|Ssi3	suppressor of cytokine signaling 3	protein-coding
1382	chr10	11024069	11025449	+	742	intron (NM_016976, intron 2 of 8)	L1MDa|LINE|L1	57572	NM_001114333	14816	Mm.391904	NM_016976	ENSMUSG00000019828	Grm1	4930455H15Rik|Gm10828|Gprc1a|mGluR1|nmf373|rcw|wobl	glutamate receptor, metabotropic 1	protein-coding
1165-4	chr17	13998534	13999697	+	742	Intergenic	(CTG)n|Simple_repeat|Simple_repeat	50742	NM_001122977	635895	Mm.388844	NM_001122977	ENSMUSG00000067941	Gm7168	EG635895	predicted gene 7168	protein-coding
1571	chr11	62602076	62603645	+	741	promoter-TSS (NR_028550)	promoter-TSS (NR_028550)	-17	NR_030738	69221	Mm.270874	NR_030738	ENSMUSG00000086841	2410006H16Rik	-	RIKEN cDNA 2410006H16 gene	ncRNA
1452-2	chr4	101418544	101419994	+	741	promoter-TSS (NM_001177605)	promoter-TSS (NM_001177605)	-20	NM_001177602	11639	Mm.42040	NM_009647	ENSMUSG00000028527	Ak4	AK 4|Ak-3|Ak-4|Ak3|Ak3l1|D4Ertd274e	adenylate kinase 4	protein-coding
1612	chr10	18100132	18101742	+	741	intron (NM_009048, intron 8 of 19)	intron (NM_009048, intron 8 of 19)	44997	NM_001111065	19707	Mm.4479	NM_009048	ENSMUSG00000019854	Reps1	BB161292	RalBP1 associated Eps domain containing protein	protein-coding
1234	chr15	78302545	78303777	+	741	intron (NM_001287389, intron 1 of 11)	intron (NM_001287389, intron 1 of 11)	2560	NM_007781	12984	Mm.1940	NM_007781	ENSMUSG00000071714	Csf2rb2	AIC2A|BetaIl3|Bil3|Csfgmrb|Il3r|Il3rb|Il3rb2	colony stimulating factor 2 receptor, beta 2, low-affinity (granulocyte-macrophage)	protein-coding
1190-2	chr10	118110965	118112153	+	740	Intergenic	Intergenic	-30228	NM_001162905	17245	Mm.101191	NM_010785	ENSMUSG00000020212	Mdm1	Arrd2|Mdm-1	transformed mouse 3T3 cell double minute 1	protein-coding
1400-2	chr15	75154673	75156071	+	740	intron (NM_001310438, intron 1 of 3)	intron (NM_001310438, intron 1 of 3)	111	NM_001310438	546644		NM_008531	ENSMUSG00000022582	Ly6g	Gr-1|Gr1|Ly-6G	lymphocyte antigen 6 complex, locus G	protein-coding
1200-8	chr6	143639922	143641120	+	740	intron (NR_045732, intron 1 of 4)	intron (NR_045732, intron 1 of 4)	10767	NR_045732	73425	Mm.417844	NR_045732	ENSMUSG00000086887	1700060C16Rik	-	RIKEN cDNA 1700060C16 gene	ncRNA
1628-2	chr5	104088255	104089881	+	740	intron (NM_001359016, intron 7 of 11)	intron (NM_001359016, intron 7 of 11)	-11460	NM_001163772	100271704	Mm.366664	NM_001163772	ENSMUSG00000091034	Gm17660	Scpppq1	predicted gene, 17660	protein-coding
1288	chr15	75134373	75135659	+	739	Intergenic	Intergenic	-20245	NM_001310438	546644		NM_008531	ENSMUSG00000022582	Ly6g	Gr-1|Gr1|Ly-6G	lymphocyte antigen 6 complex, locus G	protein-coding
1378-4	chr3	58684539	58685915	+	739	intron (NM_009174, intron 1 of 1)	intron (NM_009174, intron 1 of 1)	7161	NM_009174	20439	Mm.2847	NM_009174	ENSMUSG00000036432	Siah2	AA415433|Sinh2	siah E3 ubiquitin protein ligase 2	protein-coding
1326	chr11	87470482	87471806	+	739	intron (NM_031386, intron 2 of 30)	CpG	43553	NM_001199293	83560	Mm.440758	NM_031386	ENSMUSG00000010342	Tex14	C85585	testis expressed gene 14	protein-coding
1259	chr10	120381759	120383016	+	738	intron (NM_010441, intron 3 of 4)	intron (NM_010441, intron 3 of 4)	-7136	NR_040626	320626	Mm.446091	NR_040626	ENSMUSG00000090191	9230105E05Rik	-	RIKEN cDNA 9230105E05 gene	ncRNA
1550	chr15	38307888	38309436	+	738	Intergenic	CT-rich|Low_complexity|Low_complexity	-7951	NM_001289471	21847	Mm.4292	NM_013692	ENSMUSG00000037465	Klf10	AI115143|EGR[a]|Egral|Gdnfif|TIEG-1|Tieg|Tieg1|mGIF	Kruppel-like factor 10	protein-coding
1296-4	chr15	64112907	64114201	+	738	intron (NM_010026, intron 25 of 30)	intron (NM_010026, intron 25 of 30)	-53106	NM_001360037	223601	Mm.246108	NM_144846	ENSMUSG00000022378	Fam49b	0910001A06Rik|AW122079	family with sequence similarity 49, member B	protein-coding
1274	chr11	119979710	119980982	+	738	intron (NM_001037754, intron 3 of 13)	intron (NM_001037754, intron 3 of 13)	-34421	NR_037225	100526518		NR_037225	ENSMUSG00000105524	Mir3065	mir-3065|mmu-mir-3065	microRNA 3065	ncRNA
1250-4	chr7	112228584	112229832	+	738	intron (NM_001193305, intron 1 of 25)	intron (NM_001193305, intron 1 of 25)	3372	NM_001193305	320878	Mm.52312	NM_177282	ENSMUSG00000038244	Mical2	5330438E18Rik|9530064J02|MICAL-2|mKIAA0750	microtubule associated monooxygenase, calponin and LIM domain containing 2	protein-coding
1581	chr15	85244827	85246406	+	738	intron (NM_010180, intron 14 of 16)	intron (NM_010180, intron 14 of 16)	39608	NM_010180	14114	Mm.297992	NM_010180	ENSMUSG00000006369	Fbln1	-	fibulin 1	protein-coding
1156	chr1	138843514	138844668	+	737	intron (NM_010714, intron 2 of 6)	intron (NM_010714, intron 2 of 6)	-1647	NM_001025565	16876	Mm.250732	NM_010714	ENSMUSG00000019230	Lhx9	3110009O07Rik|BB104635|LH2B	LIM homeobox protein 9	protein-coding
1181-3	chr3	51483663	51484842	+	737	5' UTR (NM_016858, exon 1 of 2)	5' UTR (NM_016858, exon 1 of 2)	286	NM_016858	19338	Mm.1664	NM_016858	ENSMUSG00000027739	Rab33b	-	RAB33B, member RAS oncogene family	protein-coding
1183-5	chr19	39248304	39249485	+	737	intron (NR_033614, intron 3 of 8)	L1Md_A|LINE|L1	19640	NR_033614	638988	Mm.483843	NR_033614	ENSMUSG00000093610	Cyp2c53-ps	Cyp2c53|EG638988	cytochrome P450, family 2, subfamily c, polypeptide 53-ps	pseudo
1836	chr1	190956065	190957899	+	737	intron (NM_144879, intron 7 of 7)	intron (NM_144879, intron 7 of 7)	22016	NM_144879	226841	Mm.22856	NM_144879	ENSMUSG00000037568	Vash2	B130052G07Rik	vasohibin 2	protein-coding
1264-2	chr10	47453333	47454595	+	737	Intergenic	Intergenic	1209216	NR_028274	100302593		NR_028274	ENSMUSG00000095118	Snord14d	Gm23710	small nucleolar RNA, C/D box 14D	snoRNA
1399	chr18	83255197	83256594	+	737	Intergenic	(CCA)n|Simple_repeat|Simple_repeat	69989	NR_045361	70960	Mm.410834	NR_045361	ENSMUSG00000118333	4921531P14Rik	1700108N05Rik	RIKEN cDNA 4921531P14 gene	ncRNA
1163-4	chr3	95317975	95319136	+	737	promoter-TSS (NM_001320492)	promoter-TSS (NM_001320492)	-275	NM_001320492	76893	Mm.181009	NM_029789	ENSMUSG00000015714	Cers2	0610013I17Rik|AI225939|Lass2|TRH3	ceramide synthase 2	protein-coding
1451-2	chr14	25608087	25609536	+	737	intron (NM_183208, intron 6 of 23)	intron (NM_183208, intron 6 of 23)	5298	NM_001309430	100188919	Mm.473810	NM_001309430		Gm45915	Israa	predicted gene, 45915	protein-coding
1192-2	chr11	106778811	106780001	+	736	promoter-TSS (NM_001353435)	promoter-TSS (NM_001353435)	60	NM_001353435	50776	Mm.859	NM_015810	ENSMUSG00000020718	Polg2	mtPolB|p55|polG-beta	polymerase (DNA directed), gamma 2, accessory subunit	protein-coding
1076-6	chr6	112998711	112999785	+	736	Intergenic	Intergenic	-47054	NM_001355266	14911	Mm.781	NM_008188	ENSMUSG00000030264	Thumpd3	AW556087|Gt(ROSA)26asSor|Gtrosa26as	THUMP domain containing 3	protein-coding
1307-5	chr4	9144037	9145342	+	736	Intergenic	Intergenic	-124604	NM_001355183	74438	Mm.473368	NM_028940	ENSMUSG00000041216	Clvs1	4933402J24Rik|Clvl1|Rlbp1l1	clavesin 1	protein-coding
1341-5	chr15	33973827	33975166	+	735	Intergenic	Intergenic	-108223	NM_001357926	67154	Mm.130883	NM_026002	ENSMUSG00000022255	Mtdh	2610103J23Rik|3D3|3D3/Lyric|AEG-1|AV353288|D8Bwg1112e|Lyric	metadherin	protein-coding
1279-6	chr7	99858470	99859747	+	734	promoter-TSS (NM_025668)	promoter-TSS (NM_025668)	-110	NM_001164258	446101	Mm.440757	NM_001164258	ENSMUSG00000035211	Xrra1	AI449753	X-ray radiation resistance associated 1	protein-coding
1374-3	chr19	36110703	36112075	+	734	TTS (NM_013468)	TTS (NM_013468)	8455	NM_013468	107765	Mm.10279	NM_013468	ENSMUSG00000024803	Ankrd1	Alrp|CARP|Crap|MARP1	ankyrin repeat domain 1 (cardiac muscle)	protein-coding
1499	chr17	29057349	29058846	+	734	non-coding (NR_036469, exon 2 of 2)	non-coding (NR_036469, exon 2 of 2)	21029	NR_036469	100504267	Mm.438550	NR_036469	ENSMUSG00000085912	Trp53cor1	Gm16197|linc-p21|lincRNA-p21	tumor protein p53 pathway corepressor 1	ncRNA
1722	chrX	170728584	170730304	+	734	Intergenic	Intergenic	56800	NM_001199212	107626	Mm.486144	NM_001199212	ENSMUSG00000093806	Asmt	Hiomt	acetylserotonin O-methyltransferase	protein-coding
1276	chr1	106758941	106760215	+	733	exon (NM_027534, exon 1 of 10)	exon (NM_027534, exon 1 of 10)	164	NM_027534	70750	Mm.458911	NM_027534	ENSMUSG00000009905	Kdsr	6330410P18Rik|9430079B08Rik|Fvt1	3-ketodihydrosphingosine reductase	protein-coding
1455-2	chr5	118400214	118401667	+	733	Intergenic	RMER13B|LTR|ERVK	155713	NM_001081236	76792	Mm.103428	NM_001081236	ENSMUSG00000032840	2410131K14Rik	-	RIKEN cDNA 2410131K14 gene	protein-coding
1289	chr1	75316820	75318107	+	732	promoter-TSS (NM_016878)	promoter-TSS (NM_016878)	174	NM_001110831	13437	Mm.24680	NM_016878	ENSMUSG00000026209	Dnpep	AA407814	aspartyl aminopeptidase	protein-coding
1225	chr15	73597295	73598518	+	732	intron (NM_001357747, intron 2 of 7)	intron (NM_001357747, intron 2 of 7)	-1380	NM_001168255	106068	Mm.212813	NM_001033219	ENSMUSG00000079020	Slc45a4	9330175B01Rik|AW552276	solute carrier family 45, member 4	protein-coding
1486-2	chr2	56775933	56777417	+	732	Intergenic	(CTG)n|Simple_repeat|Simple_repeat	-9136	NR_105751	102465169		NR_105751	ENSMUSG00000098437	Mir195b	Gm27491|mmu-mir-195b	microRNA 195b	ncRNA
1206	chr14	25516453	25517657	+	732	intron (NM_183208, intron 2 of 23)	intron (NM_183208, intron 2 of 23)	-17384	NR_037236	100526533		NR_037236	ENSMUSG00000093081	Mir3075	mir-3075|mmu-mir-3075	microRNA 3075	ncRNA
1464-3	chr6	29747680	29749142	+	732	intron (NM_176996, intron 1 of 11)	(CTGTG)n|Simple_repeat|Simple_repeat	12914	NM_176996	319757	Mm.29279	NM_176996	ENSMUSG00000001761	Smo	E130215L21Rik|Smoh|bnb|smoothened	smoothened, frizzled class receptor	protein-coding
2135	chr6	34374006	34376139	+	732	Intergenic	(TCTCTG)n|Simple_repeat|Simple_repeat	-9175	NM_172398	67861	Mm.70371	NM_172398	ENSMUSG00000061758	Akr1b10	2310005E10Rik|Akr1b16	aldo-keto reductase family 1, member B10 (aldose reductase)	protein-coding
1275	chr1	162221121	162222394	+	732	non-coding (NR_002870, exon 1 of 1)	non-coding (NR_002870, exon 1 of 1)	-1611	NR_029796	387210		NR_029796	ENSMUSG00000065516	Mir214	Mirn214|mir-214|mmu-mir-214	microRNA 214	ncRNA
1417-4	chr15	85881999	85883414	+	731	exon (NM_028063, exon 2 of 11)	exon (NM_028063, exon 2 of 11)	3379	NM_028063	72026	Mm.158211	NM_028063	ENSMUSG00000022386	Trmu	1110005N20Rik|1600025P05Rik|AI314320|Trmt1	tRNA 5-methylaminomethyl-2-thiouridylate methyltransferase	protein-coding
1356-5	chr7	29836024	29837378	+	730	Intergenic	RMER19A|LTR|ERVK	16947	NM_173738	233057	Mm.296864	NM_173738	ENSMUSG00000050855	Zfp940	-	zinc finger protein 940	protein-coding
1557	chr11	101441683	101443238	+	730	intron (NM_011289, intron 1 of 4)	intron (NM_011289, intron 1 of 4)	215	NM_011289	19942	Mm.340658	NM_011289	ENSMUSG00000063316	Rpl27	-	ribosomal protein L27	protein-coding
1210-3	chr11	50432975	50434183	+	730	Intergenic	Intergenic	-2454	NM_172557	216724	Mm.390400	NM_172557	ENSMUSG00000020375	Rufy1	3000002E04Rik|Rabip4|ZFYVE12	RUN and FYVE domain containing 1	protein-coding
1314-2	chr19	6296175	6297487	+	730	intron (NM_010119, intron 3 of 4)	intron (NM_010119, intron 3 of 4)	-9626	NM_001033342	240505	Mm.329622	NM_001033342	ENSMUSG00000024769	Cdc42bpg	BC046418|MRCKgamma	CDC42 binding protein kinase gamma (DMPK-like)	protein-coding
983-6	chr5	135848002	135848983	+	730	intron (NM_021403, intron 3 of 14)	intron (NM_021403, intron 3 of 14)	30386	NM_021403	58212	Mm.271230	NM_021403	ENSMUSG00000039860	Srrm3	2900083I11Rik|AB041661|SRm300-like|Srrm2l	serine/arginine repetitive matrix 3	protein-coding
1306-3	chr15	76418924	76420228	+	729	intron (NM_001162489, intron 11 of 30)	intron (NM_001162489, intron 11 of 30)	-13638	NR_105919	102465576		NR_105919	ENSMUSG00000099260	Mir6954	Gm27770|mmu-mir-6954	microRNA 6954	ncRNA
1215-2	chr19	6940730	6941943	+	729	promoter-TSS (NM_001177360)	promoter-TSS (NM_001177360)	-143	NM_001177360	107173	Mm.276555	NM_207220	ENSMUSG00000024958	Gpr137	AI428855	G protein-coupled receptor 137	protein-coding
1237-2	chr2	154675633	154676868	+	729	intron (NM_029362, intron 1 of 4)	L1MB3|LINE|L1	19224	NM_029362	75608	Mm.262480	NM_029362	ENSMUSG00000038467	Chmp4b	2010012F05Rik|C76846|Snf7-2	charged multivesicular body protein 4B	protein-coding
1049-8	chr2	128567710	128568757	+	729	Intergenic	Intergenic	-24108	NM_001310641	241634	Mm.297682	NM_001310641	ENSMUSG00000074812	Spdye4c	Gm355|SpeedyB3|SpyB3	speedy/RINGO cell cycle regulator family, member E4C	protein-coding
1330-3	chr2	155929470	155930798	+	728	5' UTR (NM_018888, exon 1 of 10)	5' UTR (NM_018888, exon 1 of 10)	176	NM_001355443	56046	Mm.158827	NM_018888	ENSMUSG00000005882	Uqcc1	2310079L17Rik|2410003P15Rik|3110038N19Rik|Bfzb|Bfzp|Cbp3|Uqcc	ubiquinol-cytochrome c reductase complex assembly factor 1	protein-coding
1373-2	chr17	12759081	12760452	+	728	intron (NM_010515, intron 1 of 47)	intron (NM_010515, intron 1 of 47)	9940	NM_010515	16004	Mm.26553	NM_010515	ENSMUSG00000023830	Igf2r	AI661837|CD222|CI-MPR|M6P/IGF2R|Mpr300	insulin-like growth factor 2 receptor	protein-coding
1015	chr11	31381970	31382983	+	727	Intergenic	Intergenic	-12415	NM_011491	20856	Mm.32506	NM_011491	ENSMUSG00000020303	Stc2	AW125853|Stc-2|Stc2l|mustc2	stanniocalcin 2	protein-coding
1278	chr1	86460825	86462101	+	727	Intergenic	RMER4B|LTR|ERVK	35134	NM_027966	71863	Mm.179627	NM_027966	ENSMUSG00000036574	Tex44	1700019O17Rik	testis expressed 44	protein-coding
1413	chr5	36397237	36398648	+	727	exon (NM_030889, exon 1 of 27)	exon (NM_030889, exon 1 of 27)	197	NM_030889	81840	Mm.34113	NM_030889	ENSMUSG00000029093	Sorcs2	N28137|mKIAA1329	sortilin-related VPS10 domain containing receptor 2	protein-coding
1851-2	chr7	143648942	143650791	+	727	promoter-TSS (NM_001311145)	promoter-TSS (NM_001311145)	-202	NM_023680	79202	Mm.261384	NM_023680	ENSMUSG00000010751	Tnfrsf22	2810028K06Rik|C130035G06Rik|SOBa|Tnfrh2|Tnfrsf1al2|mDcTrailr2	tumor necrosis factor receptor superfamily, member 22	protein-coding
1440-2	chr19	46506216	46507654	+	726	intron (NM_053100, intron 1 of 5)	intron (NM_053100, intron 1 of 5)	5287	NM_053100	93679	Mm.392177	NM_053100	ENSMUSG00000025034	Trim8	AA408830|BB006755|GERP|Rnf27	tripartite motif-containing 8	protein-coding
1327-4	chr9	121117628	121118953	+	725	intron (NM_177589, intron 31 of 36)	intron (NM_177589, intron 31 of 36)	158882	NM_177589	209012	Mm.371804	NM_177589	ENSMUSG00000040936	Ulk4	4932415A06Rik|A730098P15	unc-51-like kinase 4	protein-coding
1358-2	chr15	11829289	11830645	+	725	Intergenic	L1MB2|LINE|L1	75707	NM_008728	18162	Mm.25259	NM_008728	ENSMUSG00000022206	Npr3	ANP-C|ANPR-C|EF-2|NPR-C|lgj|stri	natriuretic peptide receptor 3	protein-coding
1490	chr12	105908166	105909654	+	724	Intergenic	(CCCCAG)n|Simple_repeat|Simple_repeat	-101353	NM_011705	22367	Mm.2981	NM_011705	ENSMUSG00000021115	Vrk1	51PK	vaccinia related kinase 1	protein-coding
1035-5	chr17	31391385	31392418	+	724	intron (NM_008804, intron 1 of 18)	MTD|LTR|ERVL-MaLR	5667	NM_001163748	18585	Mm.10812	NM_008804	ENSMUSG00000041119	Pde9a	PDE9A1	phosphodiesterase 9A	protein-coding
1068-2	chr16	28936132	28937198	+	724	Intergenic	RLTR23|LTR|ERV1	-6967	NM_177718	239796	Mm.155887	NM_177718	ENSMUSG00000051065	Mb21d2	1600021P15Rik|A430031N04|C87006	Mab-21 domain containing 2	protein-coding
998-6	chr4	72390975	72391971	+	724	Intergenic	L2a|LINE|L2	190229	NR_027923	68285	Mm.37541	NR_027923		C630043F03Rik	AI851307	RIKEN cDNA C630043F03 gene	ncRNA
983-4	chr12	3541371	3542352	+	723	Intergenic	B1_Mus2|SINE|Alu	-30530	NM_001162465	13528	Mm.286202	NM_007886	ENSMUSG00000071454	Dtnb	-	dystrobrevin, beta	protein-coding
1811	chr17	35832546	35834355	+	723	TTS (NM_011655)	TTS (NM_011655)	4851	NM_011655	22154	Mm.273538	NM_011655	ENSMUSG00000001525	Tubb5	AA408537|AI596182|B130022C14Rik|M(beta)5	tubulin, beta 5 class I	protein-coding
1181	chr13	95688108	95689287	+	723	intron (NM_027711, intron 14 of 35)	ERVL-B4-int|LTR|ERVL	-8223	NM_010170	14064	Mm.440952	NM_010170	ENSMUSG00000021675	F2rl2	F730031A08|PAR3	coagulation factor II (thrombin) receptor-like 2	protein-coding
1133-5	chr3	103460369	103461500	+	723	Intergenic	MTEa|LTR|ERVL-MaLR	-114311	NM_018800	54524	Mm.88818	NM_018800	ENSMUSG00000027849	Syt6	3110037A08Rik|AW048930|sytVI	synaptotagmin VI	protein-coding
1130	chr11	100397059	100398187	+	723	promoter-TSS (NR_132425)	promoter-TSS (NR_132425)	167	NM_010593	16480	Mm.299774	NM_010593	ENSMUSG00000001552	Jup	Ctnng|D930025P04Rik|PG	junction plakoglobin	protein-coding
1200-7	chr5	114052047	114053245	+	723	intron (NM_001359214, intron 7 of 16)	intron (NM_001359214, intron 7 of 16)	38734	NM_001359214	68666	Mm.63584	NM_026805	ENSMUSG00000042078	Svop	1110030H18Rik|AI415691|msvop	SV2 related protein	protein-coding
1219-4	chr2	166470282	166471499	+	723	Intergenic	Intergenic	23439	NR_015558	319684	Mm.399746	NR_015558		5031425F14Rik	-	RIKEN cDNA 5031425F14 gene	ncRNA
1597	chr2	33215277	33216872	+	722	5' UTR (NM_011923, exon 1 of 5)	5' UTR (NM_011923, exon 1 of 5)	113	NM_011923	26360	Mm.208919	NM_011923	ENSMUSG00000004105	Angptl2	AI593246|AW260363|Arp2	angiopoietin-like 2	protein-coding
1179-3	chr2	167539155	167540332	+	722	intron (NM_011427, intron 2 of 2)	B3|SINE|B2	1548	NM_011427	20613	Mm.2093	NM_011427	ENSMUSG00000042821	Snai1	Sna|Sna1|Snail|Snail1	snail family zinc finger 1	protein-coding
1457	chr1	62702759	62704214	+	722	5' UTR (NM_010939, exon 1 of 16)	5' UTR (NM_010939, exon 1 of 16)	169	NM_001077407	18187	Mm.266341	NM_010939	ENSMUSG00000025969	Nrp2	1110048P06Rik|Np-2|Np2|Npn-2|Npn2	neuropilin 2	protein-coding
1364	chr10	81449554	81450916	+	722	Intergenic	Intergenic	22896	NM_001311127	319586	Mm.152689	NM_176954	ENSMUSG00000034818	Celf5	4930565A21Rik|Brunol5	CUGBP, Elav-like family member 5	protein-coding
1378	chr1	135802693	135804069	+	722	intron (NM_021467, intron 3 of 8)	intron (NM_021467, intron 3 of 8)	3870	NM_001112702	21952	Mm.44379	NM_021467	ENSMUSG00000026418	Tnni1	2700018B22Rik|AI747285|ssTnI	troponin I, skeletal, slow 1	protein-coding
1071-2	chr10	86971030	86972099	+	721	intron (NM_138673, intron 6 of 68)	intron (NM_138673, intron 6 of 68)	36378	NM_138673	192188	Mm.279611	NM_138673	ENSMUSG00000035459	Stab2	FEEL-2|FELL|MFEEL-2|STAB-2	stabilin 2	protein-coding
1077-4	chr3	75956157	75957232	+	721	5' UTR (NM_001291069, exon 1 of 16)	5' UTR (NM_001291069, exon 1 of 16)	255	NM_175193	73124	Mm.249232	NM_175193	ENSMUSG00000034109	Golim4	3110027H23Rik|GIMPC|GPP130|Golph4|P138	golgi integral membrane protein 4	protein-coding
1125-2	chr11	95159579	95160702	+	721	Intergenic	Intergenic	-14339	NM_007867	13394	Mm.439766	NM_007867	ENSMUSG00000020871	Dlx4	Dlx-4|Dlx7	distal-less homeobox 4	protein-coding
1497-2	chrX	31252926	31254421	+	721	Intergenic	Intergenic	-82696	NM_001243011	100042159	Mm.489579	NM_001243011	ENSMUSG00000101381	Btbd35f16	Gm3701	BTB domain containing 35, family member 16	protein-coding
1196-4	chr6	146184996	146186190	+	720	intron (NM_019923, intron 48 of 56)	intron (NM_019923, intron 48 of 56)	251471	NM_010656	16651	Mm.49689	NM_010656	ENSMUSG00000030255	Sspn	Krag	sarcospan	protein-coding
1296-2	chr10	80553886	80555180	+	720	intron (NM_025852, intron 1 of 14)	intron (NM_025852, intron 1 of 14)	7027	NM_025852	66932	Mm.1116	NM_025852	ENSMUSG00000047417	Rexo1	1700021P10Rik|2610511M11Rik|AW050347|EloA-BP1|Rex1|Tceb3bp1	REX1, RNA exonuclease 1	protein-coding
1248-3	chr13	38337644	38338890	+	720	Intergenic	(TG)n|Simple_repeat|Simple_repeat	-7449	NM_007556	12161	Mm.385759	NM_007556	ENSMUSG00000039004	Bmp6	D13Wsu115e|Vgr1	bone morphogenetic protein 6	protein-coding
1220	chr10	78470367	78471585	+	720	Intergenic	Intergenic	-6028	NM_172134	216134	Mm.206159	NM_172134	ENSMUSG00000032788	Pdxk	2310036D04Rik|AA119688|C77999	pyridoxal (pyridoxine, vitamin B6) kinase	protein-coding
1463-3	chr9	120286740	120288201	+	720	Intergenic	L1M3e|LINE|L1	-16603	NM_144557	245049	Mm.100936	NM_144557	ENSMUSG00000041794	Myrip	A230081N12Rik|Slac2-c|Slac2c	myosin VIIA and Rab interacting protein	protein-coding
1468-2	chr12	106512810	106514276	+	720	Intergenic	Intergenic	-65877	NR_036593	76639	Mm.375609	NR_036593	ENSMUSG00000092066	1700121N20Rik	-	RIKEN cDNA 1700121N20 gene	ncRNA
1195-2	chr2	101884645	101885838	+	719	Intergenic	ORR1E|LTR|ERVL-MaLR	-1021	NM_029635	76501	Mm.330424	NM_029635	ENSMUSG00000027163	Commd9	1810029F08Rik|AA409293	COMM domain containing 9	protein-coding
1033	chr11	20468854	20469885	+	718	Intergenic	Intergenic	-73797	NM_001362867	58172	Mm.339676	NM_021372	ENSMUSG00000049800	Sertad2	AB041541|AU021878|Kiaa0127|MNCb-1504|SEI-2|Sei2|TRIP-Br2|mKIAA0127	SERTA domain containing 2	protein-coding
1340-2	chr7	142460936	142462274	+	718	intron (NM_001271510, intron 1 of 10)	intron (NM_001271510, intron 1 of 10)	793	NM_001136071	16985	Mm.234003	NM_019391	ENSMUSG00000018819	Lsp1	Lsp-1|WP34|p50|pp52	lymphocyte specific 1	protein-coding
1417-3	chr14	64327103	64328518	+	718	intron (NM_001253712, intron 1 of 5)	MLT1F1|LTR|ERVL-MaLR	89146	NM_001253716	110265	Mm.26713	NM_026322	ENSMUSG00000054733	Msra	2310045J23Rik|6530413P12Rik|MSR-A	methionine sulfoxide reductase A	protein-coding
1097-4	chr5	122717408	122718503	+	718	intron (NM_001310720, intron 2 of 10)	intron (NM_001310720, intron 2 of 10)	10411	NM_001310718	18438	Mm.290884	NM_011026	ENSMUSG00000029470	P2rx4	AI504491|AW555605|D5Ertd444e|P2X4	purinergic receptor P2X, ligand-gated ion channel 4	protein-coding
1466	chr15	77836358	77837822	+	718	intron (NM_022410, intron 1 of 40)	intron (NM_022410, intron 1 of 40)	5085	NM_022410	17886	Mm.29677	NM_022410	ENSMUSG00000022443	Myh9	Fltn|Myhn-1|Myhn1|NMHCIIA|NMMHC-A|NMMHC-IIA|TU72.6	myosin, heavy polypeptide 9, non-muscle	protein-coding
1170-4	chr14	11584994	11586162	+	717	intron (NM_008981, intron 1 of 29)	intron (NM_008981, intron 1 of 29)	32025	NM_008981	19270	Mm.431266	NM_008981	ENSMUSG00000021745	Ptprg	5430405N12Rik|AW046354|AW549872|RPTPgamma	protein tyrosine phosphatase, receptor type, G	protein-coding
1122-5	chr7	49306750	49307870	+	717	intron (NM_175272, intron 1 of 37)	intron (NM_175272, intron 1 of 37)	61121	NM_175272	78286	Mm.333881	NM_175272	ENSMUSG00000052512	Nav2	5330421F07Rik|AU067780|BQ960892|HELAD1|POMFIL2|RAINB1|RAINB2|Unc53H2|mKIAA3015	neuron navigator 2	protein-coding
1579	chr10	81383774	81385351	+	716	5' UTR (NM_133964, exon 1 of 5)	5' UTR (NM_133964, exon 1 of 5)	134	NM_133964	102115	Mm.294975	NM_133964	ENSMUSG00000078440	Dohh	1110033C18Rik|AI585913|AL022869|Hlrc1	deoxyhypusine hydroxylase/monooxygenase	protein-coding
1018	chr10	118593728	118594744	+	716	Intergenic	Intergenic	-37711	NR_104123	103214	Mm.30529	NR_104123	ENSMUSG00000112230	Ifngas1	AI447422|Tmevpg1	Ifng antisense RNA 1	ncRNA
1495	chr15	102102315	102103808	+	716	5' UTR (NM_153533, exon 1 of 29)	5' UTR (NM_153533, exon 1 of 29)	127	NM_153533	209039	Mm.29389	NM_153533	ENSMUSG00000037003	Tns2	C1-ten|Tenc1|nep|nph	tensin 2	protein-coding
1415-2	chr2	118387813	118389226	+	716	promoter-TSS (NM_013719)	promoter-TSS (NM_013719)	-98	NM_001355383	27103	Mm.217616	NM_013719	ENSMUSG00000005102	Eif2ak4	2610011M03|GCN2|MGCN2	eukaryotic translation initiation factor 2 alpha kinase 4	protein-coding
1416	chr10	45285710	45287124	+	716	TTS (NR_155869)	TTS (NR_155869)	-2888	NM_024286	78977	Mm.24748	NM_024286	ENSMUSG00000019848	Popdc3	AA682104|Pop3	popeye domain containing 3	protein-coding
1219-6	chr7	35744771	35745988	+	715	intron (NM_178704, intron 3 of 18)	intron (NM_178704, intron 3 of 18)	9075	NM_178704	233115	Mm.257808	NM_178704	ENSMUSG00000043671	Dpy19l3	6030410G08|9330164H19Rik	dpy-19-like 3 (C. elegans)	protein-coding
1000-4	chr17	35059095	35060093	+	715	TTS (NM_033444)	TTS (NM_033444)	559	NM_016765	51793	Mm.1457	NM_016765	ENSMUSG00000007039	Ddah2	1110003M04Rik|AU019324|AW413173|DDAH-2|DDAHII|Ddah|G6a|NG30	dimethylarginine dimethylaminohydrolase 2	protein-coding
1359-2	chr3	60045016	60046373	+	715	Intergenic	(CACAG)n|Simple_repeat|Simple_repeat	13906	NM_023383	67758	Mm.24547	NM_023383	ENSMUSG00000027761	Aadac	5033417E09Rik|AI265437|Aada	arylacetamide deacetylase	protein-coding
1513-2	chr2	156179670	156181181	+	715	promoter-TSS (NM_001291114)	promoter-TSS (NM_001291114)	-187	NM_001362764	170791	Mm.392436	NM_133242	ENSMUSG00000027620	Rbm39	1500012C14Rik|2310040E03Rik|B330012G18Rik|C79248|R75070|Rnpc2|caper	RNA binding motif protein 39	protein-coding
1346-3	chr15	75129820	75131164	+	715	Intergenic	MLTR18C_MM|LTR|ERVK	-18521	NM_001099217	100041546	Mm.482110	NM_001099217	ENSMUSG00000022584	Ly6c2	Ly-6C.2|Ly-6C2	lymphocyte antigen 6 complex, locus C2	protein-coding
1161-3	chr19	41454512	41455671	+	714	Intergenic	RMER19B|LTR|ERVK	-27591	NM_001370767	212391	Mm.422910	NM_172154	ENSMUSG00000025019	Lcor	3110023F06Rik|A630025C20Rik|Mlr2|mKIAA1795	ligand dependent nuclear receptor corepressor	protein-coding
1231-3	chr3	138065643	138066872	+	714	exon (NM_001370862, exon 2 of 3)	exon (NM_001370862, exon 2 of 3)	1131	NR_037975	329763	Mm.169710	NM_177860	ENSMUSG00000049349	Gm5105	D830013H12|EG329763	predicted gene 5105	ncRNA
1181-2	chr14	30866982	30868161	+	714	intron (NM_028839, intron 4 of 7)	intron (NM_028839, intron 4 of 7)	-11686	NM_181390	66175	Mm.220895	NM_181390	ENSMUSG00000042485	Mustn1	1110028G01Rik|Mustang	musculoskeletal, embryonic nuclear protein 1	protein-coding
1184-7	chr17	17624621	17625803	+	714	promoter-TSS (NM_172827)	promoter-TSS (NM_172827)	-723	NM_172827	240028	Mm.328807	NM_172827	ENSMUSG00000023845	Lnpep	2010309L07Rik|4732490P18Rik|CAP|IRAP|PLAP|gp160|vp165	leucyl/cystinyl aminopeptidase	protein-coding
1059-12	chr4	89040437	89041494	+	714	Intergenic	Intergenic	-9342	NR_033533	100040617	Mm.171720	NR_033533	ENSMUSG00000085183	Wincr1	Gm12603	WNT induced non-coding RNA 1	ncRNA
1210	chr1	171287324	171288532	+	714	promoter-TSS (NM_013919)	promoter-TSS (NM_013919)	33	NM_013919	30941	Mm.27510	NM_013919	ENSMUSG00000053483	Usp21	ESTM28|Usp16|Usp23|W53272	ubiquitin specific peptidase 21	protein-coding
1027-3	chr12	108963977	108965002	+	714	intron (NM_177602, intron 2 of 6)	intron (NM_177602, intron 2 of 6)	70217	NM_177602	212198	Mm.342082	NM_177602	ENSMUSG00000040877	Wdr25	B930090D16Rik	WD repeat domain 25	protein-coding
2273	chr15	77887725	77889996	+	713	Intergenic	B1_Mus2|SINE|Alu	40134	NM_019913	56551	Mm.291917	NM_019913	ENSMUSG00000005354	Txn2	2510006J11Rik|AI788873|Trx2	thioredoxin 2	protein-coding
1107-5	chr15	35292884	35293989	+	713	Intergenic	Intergenic	-2662	NM_001368665	107587	Mm.46336	NM_054049	ENSMUSG00000022330	Osr2	5430409I15Rik|Osr2A|Osr2B	odd-skipped related 2	protein-coding
1107-4	chr13	28071818	28072923	+	713	Intergenic	Intergenic	56158	NM_011165	19110	Mm.18607	NM_011165	ENSMUSG00000005891	Prl4a1	AA409771|Ghd23|PLP-A|Prlpa	prolactin family 4, subfamily a, member 1	protein-coding
1548	chr12	112794555	112796101	+	713	Intergenic	Intergenic	-13647	NM_145450	217887	Mm.186678	NM_145450	ENSMUSG00000037594	Clba1	AW050009|C130001I08Rik|Flj20080	clathrin binding box of aftiphilin containing 1	protein-coding
1224-4	chr7	141302718	141303940	+	713	intron (NM_016874, intron 10 of 11)	intron (NM_016874, intron 10 of 11)	11311	NM_007878	13491	Mm.41075	NM_007878	ENSMUSG00000025496	Drd4	AW125663|D4R|Drd-4	dopamine receptor D4	protein-coding
1373-3	chr5	88327760	88329131	+	712	exon (NM_008644, exon 3 of 3)	exon (NM_008644, exon 3 of 3)	11133	NM_008644	17830	Mm.200411	NM_008644	ENSMUSG00000064156	Prol1	Muc10	proline rich, lacrimal 1	protein-coding
1046-5	chr2	158168112	158169156	+	712	Intergenic	Intergenic	-22242	NM_009373	21817	Mm.330731	NM_009373	ENSMUSG00000037820	Tgm2	G[a]h|TG2|TGase2|tTG|tTGas	transglutaminase 2, C polypeptide	protein-coding
1449	chr10	86777983	86779430	+	712	promoter-TSS (NM_175331)	promoter-TSS (NM_175331)	-299	NM_175331	103466	Mm.200446	NM_175331	ENSMUSG00000054027	Nt5dc3	AU040402|AW540062|C630002B14Rik|TU12B1-TY	5'-nucleotidase domain containing 3	protein-coding
1292-4	chr5	108312008	108313298	+	711	promoter-TSS (NM_001370998)	promoter-TSS (NM_001370998)	-160	NM_001081234	433931	Mm.319881	NM_001081234	ENSMUSG00000029263	Pigg	Gpi7	phosphatidylinositol glycan anchor biosynthesis, class G	protein-coding
1174-5	chr3	93596522	93597694	+	711	Intergenic	Intergenic	41991	NM_009112	20194	Mm.1	NM_009112	ENSMUSG00000041959	S100a10	42C|AA409961|AL024248|CAL12|CLP11|Cal1l|p10|p11	S100 calcium binding protein A10 (calpactin)	protein-coding
1463	chr12	86946322	86947783	+	711	promoter-TSS (NM_001289432)	promoter-TSS (NM_001289432)	11	NM_001289430	217732	Mm.22337	NM_173735	ENSMUSG00000034157	Cipc	2310044G17Rik|AI842544|AI853744	CLOCK interacting protein, circadian	protein-coding
1514	chr17	17293776	17295288	+	711	promoter-TSS (NM_001324550)	promoter-TSS (NM_001324550)	89	NM_001324550	100862203	Mm.484235	NM_001324550		Gm6712	EG626854	predicted gene 6712	protein-coding
1355	chr14	53634100	53635453	+	711	Intergenic	Intergenic	-595310	NR_155501	102632039	Mm.410779	NR_155501		Gm30214	-	predicted gene, 30214	ncRNA
1235-2	chr7	98117575	98118808	+	711	intron (NM_008663, intron 1 of 48)	intron (NM_008663, intron 1 of 48)	1302	NM_001256081	17921	Mm.1403	NM_008663	ENSMUSG00000030761	Myo7a	Hdb|Myo7|USH1B|nmf371|polka|sh-1|sh1	myosin VIIA	protein-coding
1169-12	chr9	118924936	118926103	+	710	Intergenic	GC_rich|Low_complexity|Low_complexity	-1017	NM_133710	69274	Mm.439928	NM_133710	ENSMUSG00000047409	Ctdspl	2810418J22Rik|AI426263|HYA22|SCP3	CTD (carboxy-terminal domain, RNA polymerase II, polypeptide A) small phosphatase-like	protein-coding
1129-6	chr4	54901356	54902483	+	710	Intergenic	Intergenic	-46026	NM_172867	242466	Mm.102904	NM_172867	ENSMUSG00000060206	Zfp462	6030417H05|9430078C22Rik|Gt4-2|Zfpip|Znf462	zinc finger protein 462	protein-coding
1020-3	chr2	32906131	32907149	+	710	intron (NM_146119, intron 2 of 13)	intron (NM_146119, intron 2 of 13)	30506	NM_146119	227737	Mm.301646	NM_146119	ENSMUSG00000026796	Fam129b	9130404D14Rik	family with sequence similarity 129, member B	protein-coding
1150-2	chr19	46842392	46843540	+	710	intron (NM_033569, intron 1 of 7)	intron (NM_033569, intron 1 of 7)	81357	NM_001102471	94219	Mm.306903	NM_033569	ENSMUSG00000064105	Cnnm2	AU015877|AW048635|Acdp2|Clp2	cyclin M2	protein-coding
1329-3	chrX	31960431	31961758	+	710	promoter-TSS (NM_029106).2	promoter-TSS (NM_029106).2	-950	NM_029106	74851	Mm.431329	NM_029106		Spin2-ps1	Gm14354	spindlin family, member 2, pseudogene 1	protein-coding
1292-3	chr4	8730562	8731852	+	709	intron (NM_001277149, intron 1 of 37)	intron (NM_001277149, intron 1 of 37)	-20117	NM_001355382	320790	Mm.138792	NM_001033395	ENSMUSG00000041235	Chd7	A730019I05Rik|Cycn|Cyn|Dz|Edy|Flo|GENA 47|GENA 60|Gena 52|Lda|Mt|Obt|Todo|WBE1|Whi|metis	chromodomain helicase DNA binding protein 7	protein-coding
1512-2	chr2	174438307	174439817	+	709	promoter-TSS (NM_022325)	promoter-TSS (NM_022325)	-23	NM_022325	64138	Mm.156919	NM_022325	ENSMUSG00000016256	Ctsz	AI787083|AU019819|CTSX|D2Wsu143e	cathepsin Z	protein-coding
1600	chr16	95612248	95613846	+	709	Intergenic	(GTGTG)n|Simple_repeat|Simple_repeat	-26454	NM_001302152	13876	Mm.164531	NM_133659	ENSMUSG00000040732	Erg	D030036I24Rik	ETS transcription factor	protein-coding
1380-5	chr9	63701792	63703170	+	709	intron (NM_016769, intron 1 of 8)	intron (NM_016769, intron 1 of 8)	55513	NM_016769	17127	Mm.7320	NM_016769	ENSMUSG00000032402	Smad3	AU022421|Madh3	SMAD family member 3	protein-coding
1075-4	chr12	111507250	111508323	+	709	Intergenic	RMER16C|LTR|ERVK	-21963	NM_001033248	212539	Mm.81916	NM_001033248	ENSMUSG00000010529	Gm266	-	predicted gene 266	protein-coding
1311	chr14	24731998	24733307	+	709	Intergenic	Intergenic	241899	NM_001360586	20088	Mm.16775	NM_011297	ENSMUSG00000025290	Rps24	-	ribosomal protein S24	protein-coding
1394	chr10	81595951	81597343	+	709	intron (NM_053254, intron 4 of 13)	MIR3|SINE|MIR	720	NM_001359135	114606	Mm.206764	NM_053254	ENSMUSG00000034758	Tle6	1810057E06Rik|Grg6	transducin-like enhancer of split 6	protein-coding
1201-4	chr2	164521187	164522386	+	709	Intergenic	Intergenic	24261	NM_001362644	78928	Mm.28228	NM_133779	ENSMUSG00000017721	Pigt	2510012P17Rik|4930534E15Rik|CGI-06|NDAP|Ndap7	phosphatidylinositol glycan anchor biosynthesis, class T	protein-coding
1309-2	chr15	75075054	75076361	+	709	Intergenic	MLTR18C_MM|LTR|ERVK	-26870	NM_001252056	17067	Mm.1583	NM_010741	ENSMUSG00000079018	Ly6c1	AA682074|AA959465|Ly-6C|Ly-6C1|Ly6c	lymphocyte antigen 6 complex, locus C1	protein-coding
1110-2	chr13	38256992	38258100	+	709	Intergenic	MER44B|DNA|TcMar-Tigger	52607	NM_026382	67797	Mm.250783	NM_026382	ENSMUSG00000021431	Snrnp48	1110050F08Rik|6530403A03Rik|C6orf151	small nuclear ribonucleoprotein 48 (U11/U12)	protein-coding
1337	chr1	154781041	154782376	+	709	Intergenic	(CTG)n|Simple_repeat|Simple_repeat	-55788	NM_009782	12290	Mm.267517	NM_009782	ENSMUSG00000004110	Cacna1e	A430040I15|BII|Cach6|Cacnl1a6|Cav2.3|Cchra1|alpha1E	calcium channel, voltage-dependent, R type, alpha 1E subunit	protein-coding
1155	chr12	24919140	24920293	+	708	intron (NM_001083341, intron 3 of 11)	MER2|DNA|TcMar-Tigger	-55216	NM_001081378	77480	Mm.250641	NM_001081378	ENSMUSG00000036333	Kidins220	3110039L19Rik|AI194387|AI316525|C330002I19Rik|mKIAA1250	kinase D-interacting substrate 220	protein-coding
1032-3	chr11	5181858	5182888	+	708	Intergenic	URR1B|DNA|hAT-Charlie	-30143	NR_152138	140703	Mm.840	NM_080595	ENSMUSG00000034164	Emid1	AW122071|CO-5|Emu1	EMI domain containing 1	protein-coding
1081-4	chr13	43110221	43111300	+	707	intron (NM_001005740, intron 8 of 12)	RMER19A|LTR|ERVK	-12079	NM_001005748	218194	Mm.160124	NM_198419	ENSMUSG00000054728	Phactr1	9630030F18Rik|Rpel1	phosphatase and actin regulator 1	protein-coding
1469	chr10	25678979	25680446	+	707	Intergenic	Intergenic	-58149	NR_156009	102640972	Mm.405617	NR_156009		Gm36908	-	predicted gene, 36908	ncRNA
2317	chr6	47752223	47754538	+	707	promoter-TSS (NR_002841).3	promoter-TSS (NR_002841).3	-455	NR_002841	19799		NR_002841		Rn4.5s	-	4.5S RNA	rRNA
1045-6	chr3	96171810	96172853	+	706	promoter-TSS (NM_153053)	promoter-TSS (NM_153053)	-175	NM_153053	107701	Mm.219671	NM_153053	ENSMUSG00000068856	Sf3b4	SF3b49|SF3b50|Sap49	splicing factor 3b, subunit 4	protein-coding
1238	chr15	83482075	83483311	+	706	Intergenic	B1_Mus1|SINE|Alu	-18087	NM_001358643	23970	Mm.23978	NM_011862	ENSMUSG00000016664	Pacsin2	AI197433	protein kinase C and casein kinase substrate in neurons 2	protein-coding
1345-3	chr1_GL456213_random	17413	18756	+	705	NA	(CTG)n|Simple_repeat|Simple_repeat	NA	NA
1550-2	chr8	121495304	121496852	+	705	Intergenic	Intergenic	45876	NM_001357259	76405	Mm.165697	NM_029597	ENSMUSG00000031809	1700018B08Rik	1700084O22Rik	RIKEN cDNA 1700018B08 gene	protein-coding
1273-3	chr17	15477172	15478443	+	705	intron (NM_011185, intron 4 of 5)	intron (NM_011185, intron 4 of 5)	20469	NM_011185	19170	Mm.32912	NM_011185	ENSMUSG00000014769	Psmb1	AA409053|C81484|Lmpc5	proteasome (prosome, macropain) subunit, beta type 1	protein-coding
1239-2	chr15	89283517	89284754	+	705	intron (NM_001356970, intron 23 of 24)	intron (NM_001356970, intron 23 of 24)	21597	NR_105924	102465981		NR_105924	ENSMUSG00000098442	Mir6959	Gm27807|mmu-mir-6959	microRNA 6959	ncRNA
1053-4	chr14	34582108	34583159	+	704	intron (NM_001039075, intron 2 of 9)	intron (NM_001039075, intron 2 of 9)	5974	NM_001039074	24131	Mm.29733	NM_011918	ENSMUSG00000021798	Ldb3	AW742271|PDLIM6|ZASP	LIM domain binding 3	protein-coding
1316-4	chr2	135369867	135371181	+	704	exon (NM_019677, exon 27 of 33)	exon (NM_019677, exon 27 of 33)	-154908	NR_040517	78805	Mm.78702	NR_040517	ENSMUSG00000085247	4930545L23Rik	-	RIKEN cDNA 4930545L23 gene	ncRNA
1397	chr2	166406636	166408031	+	704	Intergenic	(CAGAGA)n|Simple_repeat|Simple_repeat	-40118	NR_015558	319684	Mm.399746	NR_015558		5031425F14Rik	-	RIKEN cDNA 5031425F14 gene	ncRNA
1101-4	chr11	120641506	120642605	+	704	intron (NM_144795, intron 3 of 7)	intron (NM_144795, intron 3 of 7)	1615	NM_144795	209027	Mm.127731	NM_144795	ENSMUSG00000025140	Pycr1	P5CR 1|P5CR1	pyrroline-5-carboxylate reductase 1	protein-coding
1427	chr19	46308750	46310175	+	704	intron (NM_001177369, intron 14 of 22)	MIRc|SINE|MIR	3532	NM_001177370	18034	Mm.102365	NM_019408	ENSMUSG00000025225	Nfkb2	NF-kappaB2|lyt|p49|p49/p100|p50B|p52	nuclear factor of kappa light polypeptide gene enhancer in B cells 2, p49/p100	protein-coding
1365-4	chr8	95702933	95704296	+	704	intron (NM_001195006, intron 1 of 14)	intron (NM_001195006, intron 1 of 14)	577	NM_001195006	234593	Mm.29846	NM_145602	ENSMUSG00000036564	Ndrg4	D8Bwg1337e|Ndr1-rs|Ndr4|R74996|SMAP-8	N-myc downstream regulated gene 4	protein-coding
1222-4	chr12	24487751	24488971	+	703	Intergenic	(TG)n|Simple_repeat|Simple_repeat	-10220	NM_020614	21340	Mm.39082	NM_020614	ENSMUSG00000059669	Taf1b	4930408G01Rik|A230108M10Rik|TAFI68|Tafi86|p63	TATA-box binding protein associated factor, RNA polymerase I, B	protein-coding
1498-3	chr12	59150261	59151757	+	703	intron (NM_001368839, intron 14 of 29)	intron (NM_001368839, intron 14 of 29)	19528	NM_001165253	338320	Mm.213215	NM_146034	ENSMUSG00000021000	Mia2	Ctage5|D12Bwg0579e|Mea6|Mgea|Mgea6	MIA SH3 domain ER export factor 2	protein-coding
1321-3	chr3	137536257	137537576	+	703	Intergenic	(CAG)n|Simple_repeat|Simple_repeat	15746	NM_177665	229862	Mm.246591	NM_177665		Gm4861	9230109N16|EG229862	predicted gene 4861	protein-coding
1051-3	chr12	112776111	112777160	+	702	Intergenic	Intergenic	15980	NM_178911	104759	Mm.203915	NM_178911	ENSMUSG00000052160	Pld4	AI132321|thss	phospholipase D family, member 4	protein-coding
1246	chr1	180944505	180945749	+	702	intron (NM_144794, intron 1 of 22)	intron (NM_144794, intron 1 of 22)	2609	NM_144794	208795	Mm.185518	NM_144794	ENSMUSG00000026519	Tmem63a	BC014795|Tmem64a	transmembrane protein 63a	protein-coding
1412	chr1	170654973	170656383	+	702	intron (NM_177068, intron 3 of 7)	intron (NM_177068, intron 3 of 7)	11146	NM_177068	320078	Mm.287131	NM_177068	ENSMUSG00000038463	Olfml2b	1110018N05Rik|4832415H08Rik|AI467542	olfactomedin-like 2B	protein-coding
1538	chr5	25733966	25735502	+	702	Intergenic	(CAGAC)n|Simple_repeat|Simple_repeat	-25239	NM_001310504	242894	Mm.150319	NM_001004365	ENSMUSG00000056367	Actr3b	9630005C02|ARP11|AW047569|Arp3b|Arp3beta	ARP3 actin-related protein 3B	protein-coding
1054-4	chr11	95116592	95117644	+	702	Intergenic	Intergenic	-2999	NM_010055	13393	Mm.5194	NM_010055	ENSMUSG00000001510	Dlx3	AV237891|Dlx-3	distal-less homeobox 3	protein-coding
1361-3	chr7	24461807	24463166	+	702	promoter-TSS (NM_011113)	promoter-TSS (NM_011113)	3	NM_011113	18793	Mm.1359	NM_011113	ENSMUSG00000046223	Plaur	Cd87|u-PAR|uPAR	plasminogen activator, urokinase receptor	protein-coding
1049-9	chr2	152392249	152393296	+	702	TTS (NM_011438)	TTS (NM_011438)	5274	NM_011438	20667	Mm.28424	NM_011438	ENSMUSG00000051817	Sox12	2010205A02Rik	SRY (sex determining region Y)-box 12	protein-coding
1164-2	chr4	45499803	45500965	+	702	intron (NM_001033306, intron 1 of 5)	intron (NM_001033306, intron 1 of 5)	30444	NM_001033306	230126	Mm.251716	NM_001033306	ENSMUSG00000044813	Shb	BC028832	src homology 2 domain-containing transforming protein B	protein-coding
1280-7	chr2	167078549	167079827	+	702	Intergenic	Intergenic	13895	NR_028540	100217443		NR_028540		Snord12	MBII-99	small nucleolar RNA, C/D box 12	snoRNA
1292-2	chr3	88552229	88553519	+	701	promoter-TSS (NM_033526)	promoter-TSS (NM_033526)	77	NR_155543	83409	Mm.41680	NM_031248	ENSMUSG00000028062	Lamtor2	2010111E04Rik|AL022628|Mapbpip|P14|Rab25|Robld3	late endosomal/lysosomal adaptor, MAPK and MTOR activator 2	protein-coding
1298-3	chr5	30907091	30908387	+	701	promoter-TSS (NM_024460)	promoter-TSS (NM_024460)	49	NM_001134692	67695	Mm.21450	NM_024460	ENSMUSG00000038803	Ost4	2310016E02Rik	oligosaccharyltransferase complex subunit 4 (non-catalytic)	protein-coding
1445	chr19	42769977	42771420	+	701	intron (NM_019424, intron 5 of 19)	intron (NM_019424, intron 5 of 19)	7948	NM_001362410	192236	Mm.218381	NM_019424	ENSMUSG00000025188	Hps1	6030422N11Rik|BB405864|Gm21361|Hps|ep	HPS1, biogenesis of lysosomal organelles complex 3 subunit 1	protein-coding
1404-2	chr2	30807271	30808673	+	701	promoter-TSS (NM_001356434)	promoter-TSS (NM_001356434)	4	NM_001356436	66617	Mm.33167	NM_170592	ENSMUSG00000026857	Ntmt1	2610205E22Rik|AL033331|AL033332|Mettl11a|NTM1A	N-terminal Xaa-Pro-Lys N-methyltransferase 1	protein-coding
1383-2	chr14	24961711	24963092	+	701	Intergenic	Intergenic	-146860	NR_153781	102634576	Mm.317855	NR_153781		Gm32123	-	predicted gene, 32123	ncRNA
1420-3	chr15	12692382	12693800	+	700	intron (NM_001081064, intron 2 of 25)	intron (NM_001081064, intron 2 of 25)	46801	NM_001081064	68070	Mm.423205	NM_001081064	ENSMUSG00000022197	Pdzd2	4930537L06Rik|A930022H17Rik|Gm21706|Gm82|Pdzk3	PDZ domain containing 2	protein-coding
1229	chr10	127548148	127549375	+	700	intron (NM_008512, intron 68 of 88)	intron (NM_008512, intron 68 of 88)	-14202	NM_183297	104080	Mm.437200	NM_183297	ENSMUSG00000040258	Nxph4	1110036M10Rik|AI851051	neurexophilin 4	protein-coding
1101	chr10	61079827	61080926	+	700	Intergenic	RMER10A|LTR|ERVL	-8955	NM_025273	13180	Mm.39473	NM_025273	ENSMUSG00000020098	Pcbd1	Dcoh|Pcbd|Pcd|Phs	pterin 4 alpha carbinolamine dehydratase/dimerization cofactor of hepatocyte nuclear factor 1 alpha (TCF1) 1	protein-coding
1186	chr16	44724374	44725558	+	700	intron (NM_145972, intron 1 of 8)	intron (NM_145972, intron 1 of 8)	665	NM_145972	212547	Mm.310573	NM_145972	ENSMUSG00000036208	Nepro	-	nucleolus and neural progenitor protein	protein-coding
1164	chr2	3889427	3890589	+	700	Intergenic	Intergenic	-127675	NM_001347086	209630	Mm.37932	NM_172475	ENSMUSG00000026657	Frmd4a	2700017I06Rik|5330420J21|AI594879|C230040M21Rik|Frmd4|Gm13190|mKIAA1294	FERM domain containing 4A	protein-coding
1092-2	chr17	88092114	88093204	+	700	Intergenic	L1MB3|LINE|L1	-27368	NM_001081034	225055	Mm.386857	NM_001081034	ENSMUSG00000005371	Fbxo11	C80048|Jf	F-box protein 11	protein-coding
1310	chr19	58103319	58104627	+	700	intron (NM_181415, intron 28 of 28)	intron (NM_181415, intron 28 of 28)	52806	NR_049196	100885835		NR_049196	ENSMUSG00000093757	Mir5623	Gm26068|mir-5623|mmu-mir-5623	microRNA 5623	ncRNA
1241-5	chr15	51883118	51884357	+	700	3' UTR (NM_030132, exon 3 of 3)	3' UTR (NM_030132, exon 3 of 3)	6296	NM_030132	78581	Mm.176347	NM_030132	ENSMUSG00000022313	Utp23	1700010I21Rik|AI662478|BB238373|D530033C11Rik	UTP23 small subunit processome component	protein-coding
1438	chr1	134390460	134391896	+	700	TTS (NM_173771)	TTS (NM_173771)	5238	NM_173771	240755	Mm.67133	NM_173771	ENSMUSG00000050526	4933406M09Rik	-	RIKEN cDNA 4933406M09 gene	protein-coding
1375-5	chr7	143069270	143070643	+	700	5' UTR (NM_020285, exon 3 of 3)	5' UTR (NM_020285, exon 3 of 3)	588	NM_001115085	56844	Mm.139675	NM_020285	ENSMUSG00000045752	Tssc4	AA241958|ESTM671070	tumor-suppressing subchromosomal transferable fragment 4	protein-coding
1107-7	chr17	56666252	56667357	+	700	Intergenic	ORR1D1|LTR|ERVL-MaLR	-6421	NM_001252466	71810	Mm.29608	NM_027933	ENSMUSG00000002372	Ranbp3	2610024N24Rik|AA408221	RAN binding protein 3	protein-coding
1229-2	chr15	103358658	103359885	+	700	intron (NM_010577, intron 1 of 29)	intron (NM_010577, intron 1 of 29)	7520	NM_010577	16402	Mm.16234	NM_010577	ENSMUSG00000000555	Itga5	Cd49e|Fnra|VLA5	integrin alpha 5 (fibronectin receptor alpha)	protein-coding
1243-6	chr7	35103795	35105036	+	699	Intergenic	(CTG)n|Simple_repeat|Simple_repeat	-14878	NM_001287521	12606	Mm.349667	NM_007678	ENSMUSG00000034957	Cebpa	C/ebpalpha|CBF-A|Cebp	CCAAT/enhancer binding protein (C/EBP), alpha	protein-coding
1379-4	chr4	136142923	136144300	+	699	promoter-TSS (NM_008321)	promoter-TSS (NM_008321)	-211	NM_008321	15903	Mm.110	NM_008321	ENSMUSG00000007872	Id3	Hlh462|Idb3|bHLHb25	inhibitor of DNA binding 3	protein-coding
1200-6	chr2	158720483	158721681	+	699	intron (NM_153089, intron 2 of 10)	L2b|LINE|L2	-47017	NM_027975	71878	Mm.85162	NM_027975	ENSMUSG00000027654	Fam83d	2310007D09Rik|BB104611	family with sequence similarity 83, member D	protein-coding
1040-4	chr14	20202894	20203932	+	699	Intergenic	MTD|LTR|ERVL-MaLR	-21631	NM_021542	16529	Mm.68998	NM_021542	ENSMUSG00000023243	Kcnk5	KCNK5b|TASK-2	potassium channel, subfamily K, member 5	protein-coding
1307-3	chr15	83564969	83566274	+	699	intron (NM_009775, intron 1 of 3)	intron (NM_009775, intron 1 of 3)	2048	NM_009775	12257	Mm.1508	NM_009775	ENSMUSG00000041736	Tspo	Bzrp|IBP|PBR|Tspo1	translocator protein	protein-coding
1300-5	chr5	114902046	114903344	+	699	intron (NM_001359181, intron 2 of 4)	B3A|SINE|B2	5761	NM_001359181	23962	Mm.228363	NM_011854	ENSMUSG00000029561	Oasl2	M1204|Mmu-OASL|Oasl	2'-5' oligoadenylate synthetase-like 2	protein-coding
1713	chr14	55559251	55560962	+	699	promoter-TSS (NM_001199009)	promoter-TSS (NM_001199009)	77	NM_133734	28199	Mm.11535	NM_133734	ENSMUSG00000022214	Dcaf11	0710008A13Rik|C76035|D14Ucla1|Dacf11|GLO14|Wdr23	DDB1 and CUL4 associated factor 11	protein-coding
1285-3	chr15	99454487	99455770	+	699	intron (NM_001001884, intron 1 of 12)	intron (NM_001001884, intron 1 of 12)	2620	NM_001001884	380969	Mm.22915	NM_001001884	ENSMUSG00000023009	Nckap5l	C230021P08Rik|Cep169	NCK-associated protein 5-like	protein-coding
954	chr10	61670337	61671289	+	699	intron (NM_026438, intron 9 of 10)	intron (NM_026438, intron 9 of 10)	-9472	NM_009120	20224	Mm.391794	NM_009120	ENSMUSG00000020088	Sar1a	1600019H17Rik|Sara|Sara1	secretion associated Ras related GTPase 1A	protein-coding
1100-8	chr3	36449311	36450409	+	699	intron (NM_009673, intron 12 of 12)	intron (NM_009673, intron 12 of 12)	25664	NR_105976	102466786		NR_105976	ENSMUSG00000098808	Mir7009	Gm27472|mmu-mir-7009	microRNA 7009	ncRNA
1154-6	chr17	46110356	46111508	+	699	promoter-TSS (NM_026768)	promoter-TSS (NM_026768)	-72	NM_026768	68565	Mm.287443	NM_026768	ENSMUSG00000023967	Mrps18a	1110004O20Rik|C79712	mitochondrial ribosomal protein S18A	protein-coding
1150-3	chr6	39658084	39659232	+	698	intron (NM_139294, intron 8 of 21)	(ACTG)n|Simple_repeat|Simple_repeat	66093	NR_152450	68198	Mm.29415	NM_026612	ENSMUSG00000002416	Ndufb2	1810011O01Rik|8kDa|AGGG|AI325567|CI-AGGG	NADH:ubiquinone oxidoreductase subunit B2	protein-coding
1139-2	chr15	19121376	19122513	+	698	Intergenic	RMER1B|Other|Other	-63429	NR_155419	102639102	Mm.463245	NR_155419	ENSMUSG00000115803	Gm35496	-	predicted gene, 35496	ncRNA
1300-4	chr3	82380160	82381458	+	698	intron (NM_001356457, intron 9 of 13)	(CTCA)n|Simple_repeat|Simple_repeat	22622	NM_001356457	213582	Mm.271269	NM_001081230	ENSMUSG00000033900	Map9	5033421J10Rik|5330427D05Rik|ASAP|Mtap9	microtubule-associated protein 9	protein-coding
1059-3	chr10	77156890	77157947	+	698	intron (NM_009929, intron 2 of 41)	intron (NM_009929, intron 2 of 41)	9112	NM_009929	12822	Mm.4352	NM_009929	ENSMUSG00000001435	Col18a1	-	collagen, type XVIII, alpha 1	protein-coding
1311-3	chr9	37254782	37256091	+	698	5' UTR (NM_020258, exon 1 of 18)	5' UTR (NM_020258, exon 1 of 18)	302	NM_020258	56857	Mm.440037	NM_020258	ENSMUSG00000032122	Slc37a2	G3PP|Slc37a1|cI-2|ci2	solute carrier family 37 (glycerol-3-phosphate transporter), member 2	protein-coding
1333-2	chr17	5965777	5967108	+	698	intron (NR_151772, intron 1 of 25)	intron (NR_151772, intron 1 of 25)	-9138	NM_001357667	20975	Mm.236068	NM_011523	ENSMUSG00000023805	Synj2	AI481647|SJ2|mKIAA0348	synaptojanin 2	protein-coding
1457-3	chr7	4684537	4685992	+	697	promoter-TSS (NM_024172)	promoter-TSS (NM_024172)	-283	NM_024172	66245	Mm.6803	NM_024172	ENSMUSG00000063802	Hspbp1	1500019G21Rik	HSPA (heat shock 70kDa) binding protein, cytoplasmic cochaperone 1	protein-coding
1296	chr1	34439346	34440640	+	697	promoter-TSS (NM_027159)	promoter-TSS (NM_027159)	164	NM_178601	27993	Mm.289667	NM_178601	ENSMUSG00000026127	Imp4	AA409888|AV031295|D1Wsu40e	IMP4, U3 small nucleolar ribonucleoprotein	protein-coding
1565	chr19	56989649	56991212	+	697	intron (NM_146102, intron 1 of 20)	intron (NM_146102, intron 1 of 20)	18145	NM_146102	226250	Mm.226284	NM_146102	ENSMUSG00000025083	Afap1l2	AU041783|C86904|mKIAA1914	actin filament associated protein 1-like 2	protein-coding
1054-9	chr2	113440178	113441230	+	697	promoter-TSS (NM_001285459)	promoter-TSS (NM_001285459)	-360	NM_001285459	14260	Mm.4938	NM_010230	ENSMUSG00000044042	Fmn1	Fmn|formin-1|ld	formin 1	protein-coding
1338-3	chr9	8030594	8031930	+	697	intron (NM_001358295, intron 3 of 5)	B3A|SINE|B2	11613	NR_152396	234912	Mm.172430	NM_199017	ENSMUSG00000053070	Cfap300	9230110C19Rik	cilia and flagella associated protein 300	protein-coding
1286-2	chr6	51403115	51404399	+	696	Intergenic	Intergenic	24047	NR_110455	625167	Mm.389772	NR_110455	ENSMUSG00000107660	Gm6559	EG625167	predicted gene 6559	ncRNA
1468-3	chr13	51997708	51999174	+	696	Intergenic	Intergenic	-98300	NR_045061	74050	Mm.84860	NR_045061	ENSMUSG00000113211	4921525O09Rik	-	RIKEN cDNA 4921525O09 gene	ncRNA
1166-2	chr13	81325207	81326371	+	696	intron (NM_054053, intron 83 of 89)	intron (NM_054053, intron 83 of 89)	307355	NM_054053	110789	Mm.288694	NM_054053	ENSMUSG00000069170	Adgrv1	Frings|Gpr98|Mass1|Mgr1|VLGR1	adhesion G protein-coupled receptor V1	protein-coding
1448	chr1	177707824	177709270	+	696	Intergenic	Lx8|LINE|L1	-21267	NM_027077	69428	Mm.84467	NM_027077	ENSMUSG00000015962	1700016C15Rik	-	RIKEN cDNA 1700016C15 gene	protein-coding
1097-5	chr9	31322685	31323780	+	695	intron (NM_001368845, intron 3 of 21)	PB1D11|SINE|Alu	9805	NM_001368846	382066	Mm.335039	NM_199315	ENSMUSG00000042496	Prdm10	Gm1112|tristanin	PR domain containing 10	protein-coding
951	chr1	181210021	181210970	+	695	intron (NM_145514, intron 1 of 13)	(CA)n|Simple_repeat|Simple_repeat	1483	NM_145514	226757	Mm.289082	NM_145514	ENSMUSG00000038733	Wdr26	1600024A01Rik|AA693241|AI447817|AU044014|C77982|Gid7	WD repeat domain 26	protein-coding
1316	chr1	20818121	20819435	+	695	intron (NM_008563, intron 1 of 16)	intron (NM_008563, intron 1 of 16)	1534	NM_008563	17215	Mm.4502	NM_008563	ENSMUSG00000041859	Mcm3	AL033361|C80350|Mcmd|P1|P1-MCM3|p1.m	minichromosome maintenance complex component 3	protein-coding
1177-6	chr5	125106542	125107717	+	695	intron (NM_001253904, intron 5 of 47)	(CACCAT)n|Simple_repeat|Simple_repeat	72085	NM_001253905	20602	Mm.278646	NM_011424	ENSMUSG00000029478	Ncor2	N-CoR|SMRT|SMRTe	nuclear receptor co-repressor 2	protein-coding
1315	chr15	50571490	50572803	+	695	Intergenic	Intergenic	316903	NM_001310481	83925	Mm.30466	NM_032000	ENSMUSG00000038679	Trps1	AI115454|AI447310|D15Ertd586e	transcriptional repressor GATA binding 1	protein-coding
1256	chr10	93422143	93423397	+	695	Intergenic	Intergenic	-10337	NR_106161	102465791		NR_106161	ENSMUSG00000098679	Mir7688	Gm27874|mmu-mir-7688	microRNA 7688	ncRNA
1063-2	chr14	15886165	15887226	+	695	Intergenic	(CACCC)n|Simple_repeat|Simple_repeat	356636	NM_001359883	71147	Mm.197960	NM_027695	ENSMUSG00000021786	Oxsm	4933425A18Rik|C80494	3-oxoacyl-ACP synthase, mitochondrial	protein-coding
1114-2	chr12	4588256	4589368	+	695	Intergenic	Intergenic	-4196	NM_001198969	20403	Mm.341204	NM_011365	ENSMUSG00000020640	Itsn2	AI327390|Ese2|Sh3d1B|Sh3p18|mKIAA1256	intersectin 2	protein-coding
1374	chr11	60667850	60669222	+	694	Intergenic	Intergenic	-31154	NM_001159405	16897	Mm.285453	NM_008502	ENSMUSG00000020536	Llgl1	AI325176|Lgl1|Llglh|Mgl1	LLGL1 scribble cell polarity complex component	protein-coding
1217	chr11	28585904	28587119	+	694	Intergenic	(TTG)n|Simple_repeat|Simple_repeat	-2187	NM_001346759	216613	Mm.93759	NM_181577	ENSMUSG00000032878	Ccdc85a	-	coiled-coil domain containing 85A	protein-coding
1420-4	chr16	91454020	91455438	+	694	Intergenic	C-rich|Low_complexity|Low_complexity	-10375	NR_077219	100503120	Mm.387130	NR_077219	ENSMUSG00000084866	A930006K02Rik	-	RIKEN cDNA A930006K02 gene	ncRNA
930-3	chr7	72110240	72111168	+	693	intron (NM_001024703, intron 19 of 22)	intron (NM_001024703, intron 19 of 22)	-148686	NR_126483	102640608	Mm.399138	NR_126483	ENSMUSG00000108480	Gm36633	-	predicted gene, 36633	ncRNA
1189-3	chr9	23444573	23445760	+	693	intron (NM_028472, intron 13 of 14)	RMER1A|Other|Other	222090	NM_028472	73230	Mm.335020	NM_028472	ENSMUSG00000031963	Bmper	3110056H04Rik|CV-2|Crim3|Cv2	BMP-binding endothelial regulator	protein-coding
1185-2	chr15	99576020	99577203	+	693	Intergenic	Intergenic	-2445	NM_009699	11827	Mm.20206	NM_009699	ENSMUSG00000023013	Aqp2	AQP-CD|WCH-CD|cph|jpk	aquaporin 2	protein-coding
1187-8	chr2	132083501	132084686	+	693	intron (NM_001355430, intron 5 of 15)	intron (NM_001355430, intron 5 of 15)	-53769	NM_001362866	215653	Mm.204737	NM_175445	ENSMUSG00000027339	Rassf2	3830431H01Rik|9030412M04Rik|AI852669|AW495050	Ras association (RalGDS/AF-6) domain family member 2	protein-coding
1971	chr14	21819903	21821872	+	693	Intergenic	(CAA)n|Simple_repeat|Simple_repeat	-10674	NM_011695	22334	Mm.262327	NM_011695	ENSMUSG00000021771	Vdac2	Vdac6|mVDAC2|mVDAC6	voltage-dependent anion channel 2	protein-coding
1510-3	chr4	151308301	151309809	+	693	intron (NM_001081557, intron 5 of 23)	intron (NM_001081557, intron 5 of 23)	219485	NM_001308446	105704528	Mm.415128	NM_001308446	ENSMUSG00000078491	Gm13090	-	predicted gene 13090	protein-coding
1118-2	chr1	186116488	186117604	+	692	intron (NM_146106, intron 1 of 4)	intron (NM_146106, intron 1 of 4)	264	NM_146106	226791	Mm.257116	NM_146106	ENSMUSG00000039246	Lyplal1	BC027340|Q96AVO	lysophospholipase-like 1	protein-coding
1503	chr8	88913806	88915307	+	692	Intergenic	(CTG)n|Simple_repeat|Simple_repeat	-110179	NR_106190	102465899		NR_106190	ENSMUSG00000099078	Mir8110	Gm27571|mmu-mir-8110	microRNA 8110	ncRNA
1463-2	chr5	112270138	112271599	+	692	Intergenic	Intergenic	-5877	NM_001326590	22022	Mm.250631	NM_009419	ENSMUSG00000029344	Tpst2	AI448750|D5Ucla3|Tango13b|grm|grt	protein-tyrosine sulfotransferase 2	protein-coding
1155-4	chr2	164099166	164100319	+	692	exon (NM_021420, exon 8 of 11)	exon (NM_021420, exon 8 of 11)	25604	NM_021420	58231	Mm.234472	NM_021420	ENSMUSG00000018209	Stk4	AI447339|AU020804|Kas-2|Mst1|Ysk3	serine/threonine kinase 4	protein-coding
1164-3	chr7	80802942	80804104	+	692	promoter-TSS (NM_016721)	promoter-TSS (NM_016721)	-192	NM_016721	29875	Mm.207619	NM_016721	ENSMUSG00000030536	Iqgap1	AA682088|D7Ertd237e|D7Ertd257e|mKIAA0051	IQ motif containing GTPase activating protein 1	protein-coding
1272-3	chr14	122912304	122913574	+	692	promoter-TSS (NR_155287)	promoter-TSS (NR_155287)	-91	NR_155287	105245866	Mm.390754	NM_001039531	ENSMUSG00000075463	4930594M22Rik	F930011C10Rik|Gm15735	RIKEN cDNA 4930594M22 gene	ncRNA
1210-8	chr6	94499772	94500980	+	691	promoter-TSS (NM_026255)	promoter-TSS (NM_026255)	62	NM_026255	67582	Mm.280725	NM_026255	ENSMUSG00000045100	Slc25a26	4930433D19Rik|4933433F13Rik|AW557176|D6Bwg0781e|Slc25a6	solute carrier family 25 (mitochondrial carrier, phosphate carrier), member 26	protein-coding
1106-2	chr10	90590603	90591707	+	691	intron (NM_001359242, intron 1 of 10)	intron (NM_001359242, intron 1 of 10)	14464	NM_001177398	77531	Mm.440605	NM_181398	ENSMUSG00000058589	Anks1b	AIDA-1|AIDA-1b|C030032C09Rik|E530015N03Rik|EB-1|Gm10937|Gm1555	ankyrin repeat and sterile alpha motif domain containing 1B	protein-coding
1056	chr10	61486482	61487536	+	691	intron (NM_153542, intron 2 of 4)	intron (NM_153542, intron 2 of 4)	11176	NM_153542	216011	Mm.136116	NM_153542	ENSMUSG00000037151	Lrrc20	BC036304	leucine rich repeat containing 20	protein-coding
946-2	chr2	28526247	28527191	+	691	intron (NM_001145834, intron 1 of 17)	intron (NM_001145834, intron 1 of 17)	-6745	NM_001145835	19730	Mm.5236	NM_009058	ENSMUSG00000026821	Ralgds	Gnds|Rgds|mKIAA1308	ral guanine nucleotide dissociation stimulator	protein-coding
1298	chr10	79936653	79937949	+	691	intron (NM_001288625, intron 3 of 8)	intron (NM_001288625, intron 3 of 8)	9960	NM_001288625	13496	Mm.301282	NM_007880	ENSMUSG00000019564	Arid3a	Bright|Dri1|Dril1	AT rich interactive domain 3A (BRIGHT-like)	protein-coding
1371	chr10	84910831	84912200	+	691	Intergenic	B3A|SINE|B2	-6098	NM_001013441	237422	Mm.18936	NM_183172	ENSMUSG00000035620	Ric8b	BC051080|Ric-8|Ric-8b	RIC8 guanine nucleotide exchange factor B	protein-coding
1217-3	chr18	49720667	49721882	+	691	intron (NM_001170960, intron 2 of 3)	intron (NM_001170960, intron 2 of 3)	34327	NM_001170960	68857	Mm.96010	NM_026854	ENSMUSG00000024505	Dtwd2	1190002H09Rik|8030470C17Rik|AI414673|BB115449	DTW domain containing 2	protein-coding
1131	chr15	38441541	38442670	+	690	Intergenic	MERV1_I-int|LTR|ERV1	48442	NR_105916	102465574		NR_105916	ENSMUSG00000099110	Mir6951	Gm27765|mmu-mir-6951	microRNA 6951	ncRNA
1077-3	chr2	23068726	23069801	+	690	5' UTR (NM_001355641, exon 1 of 13)	5' UTR (NM_001355641, exon 1 of 13)	191	NM_001355638	74159	Mm.181973	NM_028793	ENSMUSG00000026781	Acbd5	1300014E15Rik	acyl-Coenzyme A binding domain containing 5	protein-coding
1436	chr1	20975197	20976631	+	690	intron (NM_027974, intron 7 of 10)	B3|SINE|B2	24288	NM_027974	71877	Mm.29178	NM_027974	ENSMUSG00000041809	Efhc1	1700029F22Rik|mRib72-1|myoclonin1	EF-hand domain (C-terminal) containing 1	protein-coding
1361	chr1	139113080	139114439	+	690	intron (NM_001166501, intron 14 of 21)	intron (NM_001166501, intron 14 of 21)	136102	NR_108103	78229	Mm.437838	NR_108103	ENSMUSG00000104900	4930596I21Rik	-	RIKEN cDNA 4930596I21 gene	ncRNA
1138-5	chr8	94107355	94108491	+	690	Intergenic	L1MD3|LINE|L1	-9414	NM_026116	67378	Mm.292107	NM_026116	ENSMUSG00000031755	Bbs2	2410125H22Rik|AI447581	Bardet-Biedl syndrome 2 (human)	protein-coding
1050-6	chr6	89238136	89239184	+	690	Intergenic	Intergenic	-22481	NR_033190	330379	Mm.297741	NM_201356		Gm839	-	predicted gene 839	ncRNA
1319-2	chr19	44354228	44355545	+	690	Intergenic	RMER19B|LTR|ERVK	21560	NM_183216	329065	Mm.313583	NM_183216	ENSMUSG00000050195	Scd4	ACOD4	stearoyl-coenzyme A desaturase 4	protein-coding
1288-3	chr3	90490412	90491698	+	690	promoter-TSS (NM_133854)	promoter-TSS (NM_133854)	-42	NM_133854	20615	Mm.331182	NM_133854	ENSMUSG00000001018	Snapin	25kDa|AA407989|AV026596|Bloc1s7|Snap25bp|Snapap	SNAP-associated protein	protein-coding
1014-4	chr8	92010536	92011548	+	689	Intergenic	Intergenic	-209388	NM_001253822	16373	Mm.238044	NM_008393	ENSMUSG00000031734	Irx3	AI894186	Iroquois related homeobox 3	protein-coding
1054-5	chr13	111724804	111725856	+	689	Intergenic	CpG	39152	NM_172593	218613	Mm.31012	NM_172593	ENSMUSG00000032727	Mier3	5730509D14|AU015422|D130064H19Rik	MIER family member 3	protein-coding
1015-6	chrX	4672589	4673602	+	689	Intergenic	(CCAA)n|Simple_repeat|Simple_repeat	-127316	NM_001243001	100042168	Mm.489575	NM_001243001	ENSMUSG00000078218	Btbd35f3	Gm3706	BTB domain containing 35, family member 3	protein-coding
1279-3	chr12	54737753	54739030	+	689	Intergenic	Intergenic	-42497	NM_025456	66266	Mm.156440	NM_025456	ENSMUSG00000054302	Eapp	1810011O16Rik	E2F-associated phosphoprotein	protein-coding
1257-2	chr17	47219039	47220294	+	689	intron (NM_001097623, intron 3 of 19)	PB1D7|SINE|Alu	-10564	NM_172622	224829	Mm.260989	NM_172622		Trerf1	9430096I18Rik|AI429294|B830015H24|RAPA|Trep-132|Trep132	transcriptional regulating factor 1	protein-coding
1253-4	chrX	102188839	102190090	+	688	promoter-TSS (NM_009094)	promoter-TSS (NM_009094)	-73	NM_009094	20102	Mm.66	NM_009094	ENSMUSG00000031320	Rps4x	Rps4|Rps4-1	ribosomal protein S4, X-linked	protein-coding
1367	chr2	179738216	179739581	+	688	intron (NM_001316723, intron 2 of 5)	intron (NM_001316723, intron 2 of 5)	237748	NM_001081092	228980	Mm.235542	NM_001081092	ENSMUSG00000039117	Taf4	135kDa|AI450312|TAFII130|TAFII135|Taf2c1|Taf4a	TATA-box binding protein associated factor 4	protein-coding
1124-2	chr12	69884690	69885812	+	688	intron (NM_201519, intron 1 of 30)	MIRc|SINE|MIR	-7854	NM_178628	73991	Mm.474462	NM_178628	ENSMUSG00000021066	Atl1	4930435M24Rik|Adfsp|Fsp1|Spg3|Spg3a	atlastin GTPase 1	protein-coding
1112-5	chr3	34511891	34513001	+	687	Intergenic	Intergenic	-47935	NR_015580	320478	Mm.444063	NR_015580	ENSMUSG00000105265	Sox2ot	B230215L15Rik	SOX2 overlapping transcript (non-protein coding)	ncRNA
1169-7	chr4	107313746	107314913	+	687	promoter-TSS (NM_001205156)	promoter-TSS (NM_001205156)	-34	NM_145550	230584	Mm.29118	NM_145550	ENSMUSG00000057375	Yipf1	C030002N13Rik	Yip1 domain family, member 1	protein-coding
1379-2	chr1	90356312	90357689	+	687	Intergenic	Intergenic	153020	NM_007722	12778	Mm.6522	NM_007722	ENSMUSG00000044337	Ackr3	AW541270|CXC-R7|CXCR-7|Cmkor1|Cxcr7|RDC-1|Rdc1	atypical chemokine receptor 3	protein-coding
1162-3	chr17	31928989	31930149	+	686	Intergenic	Intergenic	-73765	NM_010831	17691	Mm.290941	NM_010831	ENSMUSG00000024042	Sik1	Hrt-20|Msk|Sik|Sik-1|Snf1lk	salt inducible kinase 1	protein-coding
1340	chr17	83181156	83182494	+	686	Intergenic	Intergenic	-33458	NM_134117	106522	Mm.311974	NM_134117	ENSMUSG00000024247	Pkdcc	AI115348|AW548124|Adtk1|ESTM17|MAd1|Sgk493|Vlk|X83346	protein kinase domain containing, cytoplasmic	protein-coding
1171-2	chr11	48807172	48808341	+	686	exon (NM_145377, exon 6 of 6)	exon (NM_145377, exon 6 of 6)	4617	NR_028564	100216540		NR_028564	ENSMUSG00000064780	Snord95	-	small nucleolar RNA, C/D box 95	snoRNA
1162	chr11	78607037	78608197	+	686	intron (NM_008702, intron 3 of 10)	B4|SINE|B4	-56882	NM_133706	69071	Mm.29431	NM_133706	ENSMUSG00000037278	Tmem97	1810014L12Rik|AI115531|AL022956|D11Bhm182e	transmembrane protein 97	protein-coding
1208	chr11	97998898	98000104	+	686	Intergenic	Intergenic	-3328	NR_152188	217151	Mm.277896	NM_207231	ENSMUSG00000038352	Arl5c	Arl12|BC065791	ADP-ribosylation factor-like 5C	protein-coding
1128	chr1	186704982	186706108	+	686	5' UTR (NM_009367, exon 1 of 7)	5' UTR (NM_009367, exon 1 of 7)	444	NM_009367	21808	Mm.18213	NM_009367	ENSMUSG00000039239	Tgfb2	BB105277|Tgf-beta2|Tgfb-2	transforming growth factor, beta 2	protein-coding
1341-2	chr1	186448657	186449996	+	686	Intergenic	Intergenic	109355	NR_131124	320449	Mm.404477	NR_131124	ENSMUSG00000103690	A730004F24Rik	-	RIKEN cDNA A730004F24 gene	ncRNA
1332-2	chr15	75215766	75217096	+	686	promoter-TSS (NM_001371105)	promoter-TSS (NM_001371105)	53	NM_001371108
1403	chr17	6947828	6949229	+	686	promoter-TSS (NM_001083945)	promoter-TSS (NM_001083945)	-172	NM_001083945	100037282	Mm.29830	NM_001083945	ENSMUSG00000023806	Rsph3b	Rshl2b	radial spoke 3B homolog (Chlamydomonas)	protein-coding
1389-5	chr17	24895463	24896850	+	685	promoter-TSS (NM_019730)	promoter-TSS (NM_019730)	-344	NM_019730	79059	Mm.430765	NM_019730	ENSMUSG00000073435	Nme3	1810009F08Rik|AI413736|DR-nm23|Ndk3|Nm23-DR|Nm23-M3	NME/NM23 nucleoside diphosphate kinase 3	protein-coding
1368	chr10	99591504	99592870	+	685	Intergenic	Intergenic	-16984	NR_038019	100504202	Mm.403801	NR_038019	ENSMUSG00000111962	Gm20110	-	predicted gene, 20110	ncRNA
1263-4	chr6	137002289	137003550	+	685	Intergenic	(TG)n|Simple_repeat|Simple_repeat	48396	NM_023898	78600	Mm.290622	NM_023898	ENSMUSG00000064330	Pde6h	A930033D18Rik|PDEgamma	phosphodiesterase 6H, cGMP-specific, cone, gamma	protein-coding
1063-6	chr19	40992797	40993858	+	685	intron (NM_001365054, intron 1 of 16)	intron (NM_001365054, intron 1 of 16)	894	NM_001365054	17060	Mm.9749	NM_008528	ENSMUSG00000061132	Blnk	BASH|Bca|Ly-57|Ly57|Lyw-57|SLP-65	B cell linker	protein-coding
1129	chr1	74015355	74016482	+	684	intron (NM_027884, intron 4 of 34)	intron (NM_027884, intron 4 of 34)	108630	NM_027884	21961	Mm.309975	NM_027884	ENSMUSG00000055322	Tns1	1110018I21Rik|1200014E20Rik|AI648117|E030018G17Rik|E030037J05Rik|Tns	tensin 1	protein-coding
1437	chr12	84187087	84188522	+	684	intron (NM_001163501, intron 1 of 12)	intron (NM_001163501, intron 1 of 12)	6211	NM_001163502	238317	Mm.31256	NM_001163501	ENSMUSG00000042507	Elmsan1	9430029N19Rik|C130039O16Rik|Gm260	ELM2 and Myb/SANT-like domain containing 1	protein-coding
1346	chr11	84442582	84443926	+	684	intron (NM_019816, intron 11 of 12)	intron (NM_019816, intron 11 of 12)	70247	NM_019816	56321	Mm.257482	NM_019816	ENSMUSG00000018697	Aatf	4933415H02Rik|5830465M17Rik|Che-1|Trb	apoptosis antagonizing transcription factor	protein-coding
1113-8	chr8	12519163	12520274	+	684	Intergenic	Intergenic	-53318	NM_001357297	78634	Mm.116871	NM_024279	ENSMUSG00000010435	Spaca7	1700094C09Rik	sperm acrosome associated 7	protein-coding
1248-4	chr14	31494279	31495525	+	684	promoter-TSS (NM_001359850)	promoter-TSS (NM_001359850)	138	NM_001359849	67011	Mm.291731	NM_025907	ENSMUSG00000021891	Mettl6	1600013P15Rik|AI467521|AU020711	methyltransferase like 6	protein-coding
1247-3	chr16	3908080	3909325	+	684	promoter-TSS (NM_029738)	promoter-TSS (NM_029738)	-13	NM_028484	73261	Mm.486226	NM_028484	ENSMUSG00000005983	1700037C18Rik	2810022L20Rik	RIKEN cDNA 1700037C18 gene	protein-coding
1219-3	chr16	31294376	31295593	+	683	Intergenic	L1MC5a|LINE|L1	-19707	NM_025800	66849	Mm.291593	NM_025800	ENSMUSG00000047714	Ppp1r2	0610025N14Rik|2310007G06Rik|4930440J04Rik|5430408E15Rik|D16Ertd248e|I-2|IPP-2	protein phosphatase 1, regulatory inhibitor subunit 2	protein-coding
1088-5	chr2	163800429	163801515	+	683	Intergenic	Intergenic	-19862	NM_016873	22403	Mm.13828	NM_016873	ENSMUSG00000027656	Ccn5	Crgr4|Ctgfl|Rcop1|Wisp2	cellular communication network factor 5	protein-coding
1469-2	chr11	75414949	75416416	+	683	exon (NM_011340, exon 4 of 8)	exon (NM_011340, exon 4 of 8)	6941	NM_011340	20317	Mm.2044	NM_011340	ENSMUSG00000000753	Serpinf1	AI195227|EPC-1|Pedf|Pedfl|Sdf3	serine (or cysteine) peptidase inhibitor, clade F, member 1	protein-coding
1197-8	chr8	61392603	61393798	+	682	intron (NM_021506, intron 11 of 11)	intron (NM_021506, intron 11 of 11)	-94534	NM_145595	234309	Mm.29059	NM_145595	ENSMUSG00000031641	Cbr4	A730083J17Rik|BC009118	carbonyl reductase 4	protein-coding
1029-5	chr19	53066500	53067527	+	682	Intergenic	Intergenic	-9239	NR_045320	78457	Mm.76932	NR_045320	ENSMUSG00000099988	1700054A03Rik	-	RIKEN cDNA 1700054A03 gene	ncRNA
1218-2	chr12	108947617	108948833	+	682	intron (NM_177602, intron 2 of 6)	intron (NM_177602, intron 2 of 6)	53953	NM_177602	212198	Mm.342082	NM_177602	ENSMUSG00000040877	Wdr25	B930090D16Rik	WD repeat domain 25	protein-coding
1291-4	chr3	142274733	142276022	+	681	intron (NM_001190856, intron 10 of 14)	intron (NM_001190856, intron 10 of 14)	-105952	NM_001277216	12167	Mm.39089	NM_007560	ENSMUSG00000052430	Bmpr1b	AI385617|ALK-6|AV355320|Acvrlk6|Alk6|BMPR-1B|BMPR-IB|CFK-43a|SKR6	bone morphogenetic protein receptor, type 1B	protein-coding
1347-2	chr15	68226913	68228258	+	681	intron (NR_152182, intron 1 of 13)	intron (NR_152182, intron 1 of 13)	31271	NR_152182	380993	Mm.309526	NM_198644	ENSMUSG00000022335	Zfat	Gm922|Zfat1|Zfp406	zinc finger and AT hook domain containing	protein-coding
1268	chr9	106366899	106368165	+	681	Intergenic	Intergenic	-1100	NM_153459	235584	Mm.275584	NM_153459	ENSMUSG00000053716	Dusp7	AU015694|Mkpx|Pyst2	dual specificity phosphatase 7	protein-coding
1155-2	chr14	59194008	59195161	+	681	Intergenic	RMER16-int|LTR|ERVK	-6644	NM_027764	71330	Mm.234195	NM_027764	ENSMUSG00000035469	Rcbtb1	5430409I18Rik|AW111883|CLLD7|CLLL7	regulator of chromosome condensation (RCC1) and BTB (POZ) domain containing protein 1	protein-coding
1191-2	chr2	173261794	173262983	+	681	intron (NM_022995, intron 1 of 3)	intron (NM_022995, intron 1 of 3)	14145	NM_022995	65112	Mm.73682	NM_022995	ENSMUSG00000038400	Pmepa1	2210418I02Rik|AW455466|Erg1.2|N4wbp4|Stag1|Tmepai	prostate transmembrane protein, androgen induced 1	protein-coding
991	chr5	114676791	114677780	+	680	intron (NM_019821, intron 2 of 4)	B2_Mm2|SINE|B2	13650	NM_019821	56356	Mm.275766	NM_019821	ENSMUSG00000011884	Gltp	1110001F24Rik|C76925|C77564	glycolipid transfer protein	protein-coding
1038	chr10	41985795	41986831	+	680	intron (NM_001034858, intron 5 of 17)	intron (NM_001034858, intron 5 of 17)	32069	NM_001034858	213402	Mm.211320	NM_001034858	ENSMUSG00000071324	Armc2	2610018I05Rik	armadillo repeat containing 2	protein-coding
8561	chr3	93323429	93331988	+	680	exon (NM_133698, exon 3 of 4)	exon (NM_133698, exon 3 of 4)	7959	NM_133698	68723	Mm.208047	NM_133698	ENSMUSG00000041991	Hrnr	1110033K19Rik|A530063N20Rik|S100a18	hornerin	protein-coding
1387-2	chrX	31681538	31682923	+	680	Intergenic	Intergenic	-279814	NM_029106	74851	Mm.431329	NM_029106		Spin2-ps1	Gm14354	spindlin family, member 2, pseudogene 1	protein-coding
938-3	chr2	50740400	50741336	+	680	Intergenic	RSINE1|SINE|B4	-168816	NR_033595	227885	Mm.301654	NR_033595	ENSMUSG00000083270	Gm13498	-	heat shock protein 90 alpha (cytosolic), class B member 1 pseudogene	pseudo
998-3	chr18	74814854	74815850	+	680	Intergenic	Intergenic	36140	NM_177470	52538	Mm.245724	NM_177470	ENSMUSG00000036880	Acaa2	0610011L04Rik|AI255831|AI265397|D18Ertd240e	acetyl-Coenzyme A acyltransferase 2 (mitochondrial 3-oxoacyl-Coenzyme A thiolase)	protein-coding
1259-5	chr3	54596023	54597280	+	679	Intergenic	(CAGAGA)n|Simple_repeat|Simple_repeat	-96164	NR_152185	56790	Mm.486375	NM_019995	ENSMUSG00000027751	Supt20	AA667204|AI450544|D3Ertd300e|Fam48a|Supt20h|p38IP	suppressor of Ty 20	protein-coding
1481-2	chr14	122104465	122105944	+	679	non-coding (NR_015586, exon 2 of 4)	non-coding (NR_015586, exon 2 of 4)	1770	NR_015586	319727	Mm.215552	NR_015586		A330035P11Rik	-	RIKEN cDNA A330035P11 gene	ncRNA
1389-3	chr15	74997278	74998665	+	679	promoter-TSS (NM_010738)	promoter-TSS (NM_010738)	60	NM_001271417	110454	Mm.425949	NM_010738	ENSMUSG00000075602	Ly6a	Ly-6A.2|Ly-6A/E|Ly-6E.1|Sca-1|Sca1|TAP	lymphocyte antigen 6 complex, locus A	protein-coding
1313-3	chr14	75855118	75856429	+	679	Intergenic	Lx3A|LINE|L1	7850	NR_028481	100303751	Mm.484707	NR_028481	ENSMUSG00000065147	Snora31	MBI-161	small nucleolar RNA, H/ACA box 31	snoRNA
1175-3	chr17	87915743	87916916	+	679	Intergenic	Intergenic	-58721	NM_010830	17688	Mm.18210	NM_010830	ENSMUSG00000005370	Msh6	AU044881|AW550279|GTBP|Gtmbp	mutS homolog 6	protein-coding
1237	chr17	25015151	25016386	+	679	promoter-TSS (NM_020608)	promoter-TSS (NM_020608)	-318	NM_134126	106633	Mm.32802	NM_134126	ENSMUSG00000024169	Ift140	AI661311|Tce5|Wdtc2|mKIAA0590	intraflagellar transport 140	protein-coding
1078-4	chr3	53447800	53448876	+	678	Intergenic	Intergenic	14920	NM_172501	212114	Mm.85744	NM_172501	ENSMUSG00000042997	Nhlrc3	4833441N19|8030451K01Rik|mKIAA4083	NHL repeat containing 3	protein-coding
1309	chr12	106021577	106022884	+	678	intron (NM_001029843, intron 1 of 13)	intron (NM_001029843, intron 1 of 13)	-3577	NM_001364365	22367	Mm.2981	NM_011705	ENSMUSG00000021115	Vrk1	51PK	vaccinia related kinase 1	protein-coding
934-7	chr19	47527429	47528361	+	678	intron (NM_175360, intron 3 of 9)	intron (NM_175360, intron 3 of 9)	9224	NM_175360	108689	Mm.218048	NM_175360	ENSMUSG00000042694	Stn1	0610009H20Rik|2310057J23Rik|AAF-44|AAF44|AI413458|Obfc1|RPA-32	STN1, CST complex subunit	protein-coding
1279	chr10	90908274	90909551	+	678	intron (NM_001359242, intron 5 of 10)	intron (NM_001359242, intron 5 of 10)	79069	NM_001347053	77531	Mm.440605	NM_181398	ENSMUSG00000058589	Anks1b	AIDA-1|AIDA-1b|C030032C09Rik|E530015N03Rik|EB-1|Gm10937|Gm1555	ankyrin repeat and sterile alpha motif domain containing 1B	protein-coding
1365	chr13	36915772	36917135	+	678	intron (NM_028784, intron 10 of 14)	intron (NM_028784, intron 10 of 14)	132760	NM_028784	74145	Mm.235105	NM_028784	ENSMUSG00000039109	F13a1	1200014I03Rik|AI462306|F13a	coagulation factor XIII, A1 subunit	protein-coding
1040-5	chr18	61659869	61660907	+	677	intron (NR_045402, intron 1 of 4)	intron (NR_045402, intron 1 of 4)	5150	NR_045402	328968	Mm.392305	NR_045402		Carmn	Carmen|E330013P06|Gm16908|Mir143hg	cardiac mesoderm enhancer-associated non-coding RNA	ncRNA
1132-5	chr2	174939693	174940823	+	677	Intergenic	Intergenic	127511	NM_001085546	664987		NM_001085546	ENSMUSG00000078905	Gm14393	-	predicted gene 14393	protein-coding
1228-6	chr6	72511813	72513039	+	677	Intergenic	Intergenic	-31965	NM_007599	12332	Mm.18626	NM_007599	ENSMUSG00000056737	Capg	gCap39|mbh1	capping protein (actin filament), gelsolin-like	protein-coding
916-3	chr12	16551860	16552774	+	677	intron (NM_001355598, intron 14 of 20)	intron (NM_001355598, intron 14 of 20)	37453	NM_015763	14245	Mm.153625	NM_015763	ENSMUSG00000020593	Lpin1	Lipin1|fld	lipin 1	protein-coding
995-2	chr18	6490020	6491013	+	677	TTS (NR_035446)	TTS (NR_035446)	130	NR_035446	100316773		NR_035446	ENSMUSG00000084514	Mir1893	Mirn1893|mmu-mir-1893	microRNA 1893	ncRNA
1050-8	chr7	132551180	132552228	+	677	Intergenic	Intergenic	24694	NM_016978	18242	Mm.13694	NM_016978	ENSMUSG00000030934	Oat	AI194874|rhg	ornithine aminotransferase	protein-coding
1252-3	chr2	25353908	25355158	+	677	exon (NM_031843, exon 7 of 13)	exon (NM_031843, exon 7 of 13)	1799	NM_031843	83768	Mm.21440	NM_031843	ENSMUSG00000026958	Dpp7	DPPII|Dpp2|QPP	dipeptidylpeptidase 7	protein-coding
1280-2	chr1	178865740	178867018	+	677	intron (NM_001161665, intron 6 of 14)	intron (NM_001161665, intron 6 of 14)	337254	NM_001161665	269152	Mm.129727	NM_177724	ENSMUSG00000026494	Kif26b	4832420M10|BC056349|D230039L06Rik	kinesin family member 26B	protein-coding
1107-9	chr2	97544610	97545715	+	677	intron (NM_001363047, intron 7 of 8)	intron (NM_001363047, intron 7 of 8)	77505	NM_001363049	241568	Mm.241682	NM_178725	ENSMUSG00000050587	Lrrc4c	6430556C10Rik|NGL-1	leucine rich repeat containing 4C	protein-coding
1387	chr19	53400733	53402118	+	676	Intergenic	B3|SINE|B2	-10791	NM_172429	76479	Mm.313687	NM_172429	ENSMUSG00000025024	Smndc1	-	survival motor neuron domain containing 1	protein-coding
1411	chr15	37430337	37431746	+	676	intron (NM_029113, intron 2 of 3)	intron (NM_029113, intron 2 of 3)	1623	NR_045283	100503538	Mm.445166	NR_045283	ENSMUSG00000086992	Gm15941	-	predicted gene 15941	ncRNA
1202	chr10	98324376	98325576	+	676	intron (NR_045179, intron 4 of 4)	intron (NR_045179, intron 4 of 4)	26891	NR_045179	667438	Mm.414522	NR_045179	ENSMUSG00000112896	Gm8633	EG667438	predicted gene 8633	ncRNA
1067-3	chr4	120228418	120229483	+	676	Intergenic	Intergenic	58311	NM_194060	329934	Mm.277090	NM_194060	ENSMUSG00000052135	Foxo6	-	forkhead box O6	protein-coding
1043-4	chr2	167537710	167538751	+	676	promoter-TSS (NM_011427)	promoter-TSS (NM_011427)	35	NM_011427	20613	Mm.2093	NM_011427	ENSMUSG00000042821	Snai1	Sna|Sna1|Snail|Snail1	snail family zinc finger 1	protein-coding
1394-2	chr12	108393552	108394944	+	676	intron (NM_001286346, intron 1 of 21)	PB1|SINE|Alu	-16385	NM_001043336	68519	Mm.236645	NM_001043335	ENSMUSG00000058070	Eml1	1110008N23Rik|A930030P13Rik|AA171013|AI847476|AI853955|ELP79|EMAP|EMAP-1|EMAPL|heco	echinoderm microtubule associated protein like 1	protein-coding
1008-7	chr17	29437711	29438717	+	676	Intergenic	Intergenic	-52571	NM_008842	18712	Mm.328931	NM_008842	ENSMUSG00000024014	Pim1	Pim-1	proviral integration site 1	protein-coding
1956-02-01	chr9	107553885	107555839	+	676	exon (NM_019713, exon 1 of 5)	exon (NM_019713, exon 1 of 5)	279	NM_019713	56289	Mm.12091	NM_019713	ENSMUSG00000010067	Rassf1	123F2|AA536941|AU044980|NORE2A|RDA32|REH3P21|Rassf1A|Rassf1B|Rassf1C	Ras association (RalGDS/AF-6) domain family member 1	protein-coding
1375	chr10	21930709	21932082	+	675	intron (NM_001161845, intron 2 of 13)	intron (NM_001161845, intron 2 of 13)	-47277	NM_001161847	20393	Mm.28405	NM_011361	ENSMUSG00000019970	Sgk1	Sgk	serum/glucocorticoid regulated kinase 1	protein-coding
1086-11	chr7	139223537	139224621	+	675	intron (NM_027164, intron 5 of 10)	intron (NM_027164, intron 5 of 10)	-10772	NM_001162540	57740	Mm.65336	NM_021302	ENSMUSG00000015981	Stk32c	PKE|Pkek|YANK3	serine/threonine kinase 32C	protein-coding
1020-4	chr2	131185759	131186777	+	675	promoter-TSS (NM_023117)	promoter-TSS (NM_023117)	-680	NM_023117	12531	Mm.38444	NM_023117	ENSMUSG00000027330	Cdc25b	AI604853	cell division cycle 25B	protein-coding
1216-6	chr9	34408951	34410165	+	675	Intergenic	ID_B1|SINE|B4	-79173	NM_026324	67703	Mm.220710	NM_026324	ENSMUSG00000032036	Kirrel3	1500010O20Rik|2900036G11Rik|NEPH2|SST4|mKIAA1867	kirre like nephrin family adhesion molecule 3	protein-coding
2094-02-01	chr11	4044530	4046622	+	675	intron (NM_146013, intron 11 of 11)	(TCTCTG)n|Simple_repeat|Simple_repeat	13794	NM_146013	103655	Mm.337476	NM_146013	ENSMUSG00000019368	Sec14l4	AI256582|AW536553|SPF|TAP	SEC14-like lipid binding 4	protein-coding
1801	chr3	93282994	93284793	+	674	Intergenic	Intergenic	-35856	NM_133698	68723	Mm.208047	NM_133698	ENSMUSG00000041991	Hrnr	1110033K19Rik|A530063N20Rik|S100a18	hornerin	protein-coding
1479-2	chr7	25485838	25487315	+	674	intron (NR_015569, intron 4 of 6)	RMER19C|LTR|ERVK	-8951	NM_001039187	26365	Mm.322502	NM_011926	ENSMUSG00000074272	Ceacam1	Bgp|Bgp1|C-CAM|CD66a|Cc1|Cea-1|Cea-7|Cea1|Cea7|Hv-2|Hv2|MHVR|MHVR1|Mhv-1|bb-1|mCEA1|mmCGM1|mmCGM1a|mmCGM2	carcinoembryonic antigen-related cell adhesion molecule 1	protein-coding
1222-3	chr11	120204165	120205385	+	674	Intergenic	(CTG)n|Simple_repeat|Simple_repeat	-14919	NR_030682	100042332	Mm.269766	NR_030682		2810410L24Rik	-	RIKEN cDNA 2810410L24 gene	ncRNA
1146-8	chr4	148038199	148039343	+	674	promoter-TSS (NM_010840)	promoter-TSS (NM_010840)	42	NM_011929	26372	Mm.89987	NM_011929	ENSMUSG00000029016	Clcn6	AI850629|Clc6	chloride channel, voltage-sensitive 6	protein-coding
1313-2	chr12	21416892	21418203	+	674	promoter-TSS (NM_011739)	promoter-TSS (NM_011739)	-111	NM_011739	22630	Mm.289630	NM_011739	ENSMUSG00000076432	Ywhaq	2700028P07Rik|AA409740|AU021156|R74690	tyrosine 3-monooxygenase/tryptophan 5-monooxygenase activation protein theta	protein-coding
1062-2	chr15	69061555	69062615	+	674	intron (NM_010158, intron 7 of 8)	intron (NM_010158, intron 7 of 8)	133665	NM_010158	13992	Mm.17964	NM_010158	ENSMUSG00000022332	Khdrbs3	Etle|SLM-2|Salp|Slm2|T-STAR	KH domain containing, RNA binding, signal transduction associated 3	protein-coding
1044-3	chr4	119100492	119101534	+	674	Intergenic	Intergenic	-7732	NM_011400	20525	Mm.21002	NM_011400	ENSMUSG00000028645	Slc2a1	Glut-1|Glut1	solute carrier family 2 (facilitated glucose transporter), member 1	protein-coding
1143	chr11	8977170	8978311	+	674	Intergenic	Intergenic	33451	NM_001303610	15574	Mm.42201	NM_008316	ENSMUSG00000020413	Hus1	-	HUS1 checkpoint clamp component	protein-coding
997-7	chr2	30035919	30036914	+	674	intron (NM_001008498, intron 2 of 8)	intron (NM_001008498, intron 2 of 8)	12463	NM_001008498	71820	Mm.88053	NM_001008498	ENSMUSG00000039715	Wdr34	3200002I06Rik	WD repeat domain 34	protein-coding
1246-3	chr2	169420840	169422084	+	674	Intergenic	Intergenic	-211047	NM_001363022	228911	Mm.315789	NM_080455	ENSMUSG00000047907	Tshz2	2900073F20Rik|B830045G17|Mtsh2|Sdccag33l|Tsh2|Zfp218|mKIAA4248|teashirt2	teashirt zinc finger family member 2	protein-coding
1077-5	chr5	91038293	91039368	+	674	Intergenic	Intergenic	11313	NM_053087	71920	Mm.197319	NM_053087	ENSMUSG00000035020	Epgn	2310069M11Rik|epigen	epithelial mitogen	protein-coding
1193-8	chr4	7446167	7447358	+	673	Intergenic	(CAG)n|Simple_repeat|Simple_repeat	-113926	NR_040645	71510	Mm.410775	NR_040645	ENSMUSG00000086070	8430436N08Rik	-	RIKEN cDNA 8430436N08 gene	ncRNA
1293	chr3	88022336	88023627	+	673	intron (NM_022031, intron 6 of 6)	CpG	4530	NM_022031	73940	Mm.294467	NM_022031	ENSMUSG00000004894	Hapln2	4930401E20Rik|Bral1	hyaluronan and proteoglycan link protein 2	protein-coding
1078-5	chr9	50750612	50751688	+	673	promoter-TSS (NM_001289782)	promoter-TSS (NM_001289782)	-175	NM_001289782	12955	Mm.178	NM_009964	ENSMUSG00000032060	Cryab	Crya-2|Crya2|HspB5|P23	crystallin, alpha B	protein-coding
1379-6	chrX	3836943	3838320	+	673	promoter-TSS (NM_001270685)	promoter-TSS (NM_001270685)	-975	NM_001270685	100862314	Mm.431329	NM_001270685	ENSMUSG00000095770	Gm21637	-	predicted gene, 21637	protein-coding
1097-2	chr11	52699868	52700963	+	673	Intergenic	Intergenic	-64291	NM_177059	320027	Mm.44518	NM_177059	ENSMUSG00000036264	Fstl4	B230374F23Rik|SPIG1|mKIAA1061	follistatin-like 4	protein-coding
1251	chr1	152537780	152539029	+	673	intron (NM_001346118, intron 11 of 18)	L1MD3|LINE|L1	86813	NM_016846	19731	Mm.245270	NM_016846	ENSMUSG00000026482	Rgl1	Rgl|mKIAA0959	ral guanine nucleotide dissociation stimulator,-like 1	protein-coding
1051-7	chr9	55541093	55542142	+	672	intron (NM_027397, intron 1 of 5)	intron (NM_027397, intron 1 of 5)	468	NM_027397	104360	Mm.273996	NM_027397	ENSMUSG00000032318	Isl2	3110001N10Rik	insulin related protein 2 (islet 2)	protein-coding
1903	chr8	105253993	105255894	+	672	5' UTR (NM_001271915, exon 1 of 1)	5' UTR (NM_001271915, exon 1 of 1)	210	NM_001271915	97440	Mm.489600	NM_178879	ENSMUSG00000069920	B3gnt9	3-Gn-T9|B3gnt9-ps|BGnT-9|C76565|C76566|beta-1|beta3Gn-T9	UDP-GlcNAc:betaGal beta-1,3-N-acetylglucosaminyltransferase 9	protein-coding
1003-6	chr2	131066904	131067905	+	672	Intergenic	Intergenic	-3590	NM_001163529	110751	Mm.108550	NM_033615	ENSMUSG00000027318	Adam33	Adaml	a disintegrin and metallopeptidase domain 33	protein-coding
1406-2	chr14	25226722	25228126	+	672	Intergenic	Intergenic	-84183	NR_045718	75862	Mm.109191	NR_045718	ENSMUSG00000114916	4930572O13Rik	-	RIKEN cDNA 4930572O13 gene	ncRNA
1466-3	chr3	27025775	27027239	+	672	Intergenic	(CTG)n|Simple_repeat|Simple_repeat	127347	NM_007900	13605	Mm.261453	NM_007900	ENSMUSG00000027699	Ect2	AI528536	ect2 oncogene	protein-coding
1016-2	chr18	24151446	24152460	+	672	Intergenic	MLT1A1|LTR|ERVL-MaLR	-30134	NM_172625	225280	Mm.258973	NM_172625	ENSMUSG00000047989	Ino80c	D030070L09Rik	INO80 complex subunit C	protein-coding
1126	chr13	67107930	67109054	+	672	intron (NM_001256052, intron 2 of 6)	intron (NM_001256052, intron 2 of 6)	5536	NM_001256052	432770	Mm.124021	NM_001256052	ENSMUSG00000074824	Rslcan18	mszf51	regulator of sex-limitation candidate 18	protein-coding
1059-5	chr12	102158116	102159173	+	672	intron (NM_172152, intron 2 of 16)	intron (NM_172152, intron 2 of 16)	29917	NM_172152	238384	Mm.312448	NM_172152	ENSMUSG00000041771	Slc24a4	A930002M03Rik|AW492432|NCKX4	solute carrier family 24 (sodium/potassium/calcium exchanger), member 4	protein-coding
1197-7	chr6	145341399	145342594	+	671	Intergenic	Intergenic	-45629	NR_003625	381827	Mm.179075	NM_001001987		1700073E17Rik	-	ribosomal protein L7 pseudogene	pseudo
988	chr10	22306163	22307149	+	671	promoter-TSS (NR_015465)	promoter-TSS (NR_015465)	-126	NR_015465	606736	Mm.387042	NR_015465	ENSMUSG00000097352	C920009B18Rik	-	RIKEN cDNA C920009B18 gene	ncRNA
1192-4	chr2	25223690	25224880	+	671	intron (NM_146116, intron 1 of 3)	CpG-7809	417	NM_146116	227613	Mm.227260	NM_146116	ENSMUSG00000036752	Tubb4b	4930542G03Rik|Tubb2c|Tubb2c1	tubulin, beta 4B class IVB	protein-coding
1066-4	chr4	132826924	132827988	+	671	3' UTR (NM_146154, exon 7 of 7)	3' UTR (NM_146154, exon 7 of 7)	15678	NM_001355198	100336	Mm.105230	NM_146154	ENSMUSG00000028882	Ppp1r8	6330548N22Rik|AU044684|NIPP1	protein phosphatase 1, regulatory subunit 8	protein-coding
1187-2	chr11	96977028	96978213	+	671	promoter-TSS (NM_030220)	promoter-TSS (NM_030220)	68	NM_030220	78912	Mm.491183	NM_030220	ENSMUSG00000018678	Sp2	4930480I16Rik|mKIAA0048	Sp2 transcription factor	protein-coding
1420	chr12	86882915	86884333	+	671	exon (NM_145836, exon 1 of 1)	exon (NM_145836, exon 1 of 1)	1190	NM_145836	238330	Mm.248358	NM_145836	ENSMUSG00000034168	Irf2bpl	6430527G18Rik|Eap1	interferon regulatory factor 2 binding protein-like	protein-coding
1285-6	chr19	44191077	44192360	+	671	intron (NM_181422, intron 1 of 14)	intron (NM_181422, intron 1 of 14)	724	NM_181422	329064	Mm.308481	NM_181422	ENSMUSG00000037578	Pkd2l1	B830002B15|BC046386|PCL|PKD2L|Pkdl|TRPP3	polycystic kidney disease 2-like 1	protein-coding
1243-2	chr17	4330952	4332193	+	670	Intergenic	Intergenic	-209470	NR_045462	78043	Mm.398313	NR_045462	ENSMUSG00000116615	4930548J01Rik	1700113K09Rik	RIKEN cDNA 4930548J01 gene	ncRNA
1555-2	chr6	72597877	72599430	+	670	promoter-TSS (NM_001364553)	promoter-TSS (NM_001364553)	51	NM_026159	67442	Mm.305108	NM_026159	ENSMUSG00000056666	Retsat	0610039N19Rik|C80029|MMT-7|Ppsig	retinol saturase (all trans retinol 13,14 reductase)	protein-coding
1384	chr15	80060356	80061738	+	670	Intergenic	Intergenic	17532	NR_028282	100302601		NR_028282	ENSMUSG00000077734	Snord83b	MBII-10	small nucleolar RNA, C/D box 83B	snoRNA
1177-4	chr18	84513713	84514888	+	670	intron (NM_001033341, intron 3 of 8)	intron (NM_001033341, intron 3 of 8)	75204	NM_001033341	240476	Mm.329575	NM_001033341	ENSMUSG00000048410	Zfp407	6430585N13Rik|Gm333|Gm334|Gm948|ZNF407	zinc finger protein 407	protein-coding
1051-2	chr12	61068295	61069344	+	670	Intergenic	L1Md_F2|LINE|L1	453001	NR_045049	100504101	Mm.235026	NR_045049	ENSMUSG00000113429	Gm20063	-	predicted gene, 20063	ncRNA
1162-2	chr17	7945125	7946285	+	670	promoter-TSS (NM_025789)	promoter-TSS (NM_025789)	91	NM_025789	66832	Mm.29830	NM_025789	ENSMUSG00000073471	Rsph3a	1700012G05Rik|4930524H12Rik|R74860|Rshl2|Rshl2a	radial spoke 3A homolog (Chlamydomonas)	protein-coding
1051-6	chr4	155868914	155869963	+	670	promoter-TSS (NM_028020)	promoter-TSS (NM_028020)	2	NM_024472	79554	Mm.25556	NM_024472	ENSMUSG00000029073	Cptp	Gltpd1	ceramide-1-phosphate transfer protein	protein-coding
926-8	chr9	99505098	99506022	+	669	intron (NM_028768, intron 13 of 21)	intron (NM_028768, intron 13 of 21)	35139	NR_028123	69797	Mm.307159	NR_028123	ENSMUSG00000046242	1600029I14Rik	-	RIKEN cDNA 1600029I14 gene	ncRNA
1383	chr13	51846413	51847794	+	669	intron (NM_011817, intron 1 of 3)	CpG-3857	428	NM_011817	23882	Mm.281298	NM_011817	ENSMUSG00000021453	Gadd45g	AI327420|C86281|CR6|DDIT2|OIG37	growth arrest and DNA-damage-inducible 45 gamma	protein-coding
1052	chr10	70962562	70963612	+	669	intron (NM_001347189, intron 3 of 21)	intron (NM_001347189, intron 3 of 21)	196603	NM_031397	83675	Mm.286834	NM_031397	ENSMUSG00000014329	Bicc1	Bic-C|bpk|jcpk	BicC family RNA binding protein 1	protein-coding
2105-02-01	chr17	30518522	30520625	+	668	intron (NM_172618, intron 4 of 11)	intron (NM_172618, intron 4 of 11)	56714	NM_172618	224671	Mm.41220	NM_027060	ENSMUSG00000062202	Btbd9	1700023F20Rik|4930402L05|AI464421	BTB (POZ) domain containing 9	protein-coding
1411-2	chr4	44037547	44038956	+	668	intron (NM_001357539, intron 10 of 10)	intron (NM_001357539, intron 10 of 10)	25581	NM_001369158	12757	Mm.298875	NM_016760	ENSMUSG00000028478	Clta	AV026556|Lca	clathrin, light polypeptide (Lca)	protein-coding
1237-3	chr5	66046122	66047357	+	668	intron (NM_178446, intron 2 of 6)	intron (NM_178446, intron 2 of 6)	-42454	NR_027961	231253	Mm.436542	NM_177679	ENSMUSG00000054598	9130230L23Rik	-	RIKEN cDNA 9130230L23 gene	ncRNA
1420-2	chr12	112768281	112769699	+	668	TTS (NM_178911)	TTS (NM_178911)	8335	NM_178911	104759	Mm.203915	NM_178911	ENSMUSG00000052160	Pld4	AI132321|thss	phospholipase D family, member 4	protein-coding
1311-2	chr15	12015919	12017228	+	668	Intergenic	Intergenic	-20566	NM_011294	20024	Mm.41746	NM_011294	ENSMUSG00000022205	Sub1	AI842364|P15|P9|Pc4|Rpo2tc1	SUB1 homolog, transcriptional regulator	protein-coding
1316-2	chr10	39434670	39435984	+	668	intron (NM_001122892, intron 2 of 12)	intron (NM_001122892, intron 2 of 12)	65528	NM_001122893	14360	Mm.4848	NM_008054	ENSMUSG00000019843	Fyn	AI448320|AW552119	Fyn proto-oncogene	protein-coding
1825	chr15	84679551	84681374	+	668	promoter-TSS (NM_146061)	promoter-TSS (NM_146061)	-536	NM_146061	109270	Mm.291372	NM_146061	ENSMUSG00000036106	Prr5	AU043908|Arhgap8|C030017C09Rik|C78947|Protor-1|Protor1	proline rich 5 (renal)	protein-coding
1259-3	chr19	23918801	23920058	+	668	intron (NM_177034, intron 5 of 12)	MTE-int|LTR|ERVL-MaLR	111590	NM_001114174	381217	Mm.426078	NM_001114174	ENSMUSG00000071604	Fam189a2	AI414343|AI666772|Gm967	family with sequence similarity 189, member A2	protein-coding
2041	chr10	60794324	60796363	+	667	intron (NM_001359273, intron 1 of 15)	intron (NM_001359273, intron 1 of 15)	36238	NM_029770	107449	Mm.290433	NM_029770	ENSMUSG00000020099	Unc5b	6330415E02Rik|A630020F16|D10Bwg0792e|Unc5h2	unc-5 netrin receptor B	protein-coding
1357-2	chr2	27886649	27888004	+	667	intron (NM_015734, intron 1 of 65)	intron (NM_015734, intron 1 of 65)	901	NM_015734	12831	Mm.7281	NM_015734	ENSMUSG00000026837	Col5a1	AI413331	collagen, type V, alpha 1	protein-coding
1104	chr11	106737107	106738209	+	667	Intergenic	B1F1|SINE|Alu	-13568	NM_001271375	380732	Mm.343952	NM_001033435	ENSMUSG00000040528	Milr1	Allergin-1|Gm885|Mca32	mast cell immunoglobulin like receptor 1	protein-coding
1118	chr1	74732181	74733297	+	667	intron (NM_024264, intron 2 of 8)	intron (NM_024264, intron 2 of 8)	16216	NM_153744	241113	Mm.166501	NM_153744	ENSMUSG00000006542	Prkag3	AMPKg3L|AMPKg3S|Amkg3|Ampkg3	protein kinase, AMP-activated, gamma 3 non-catalytic subunit	protein-coding
1329	chr2	32981343	32982670	+	667	promoter-TSS (NM_001356409)	promoter-TSS (NM_001356409)	77	NR_151461	56017	Mm.305754	NM_019488	ENSMUSG00000026791	Slc2a8	D2Ertd44e|GLUT8|GlutX1	solute carrier family 2, (facilitated glucose transporter), member 8	protein-coding
1415	chr11	20332463	20333876	+	667	promoter-TSS (NM_018861)	promoter-TSS (NM_018861)	-456	NM_018861	55963	Mm.6379	NM_018861	ENSMUSG00000020142	Slc1a4	ASCT-1|ASCT1|AW045657|SATT	solute carrier family 1 (glutamate/neutral amino acid transporter), member 4	protein-coding
1315-2	chr18	22452104	22453417	+	667	intron (NM_001167777, intron 7 of 12)	intron (NM_001167777, intron 7 of 12)	107671	NM_001167777	211961	Mm.392310	NM_001167777	ENSMUSG00000045215	Asxl3	C230079D11Rik|D430002O22Rik|D930044O18Rik|Gm329|Gm945	additional sex combs like 3, transcriptional regulator	protein-coding
1448-2	chr16	66574947	66576393	+	666	Intergenic	SUBTEL_sa|Satellite|Satellite	-81448	NR_040512	75501	Mm.394300	NR_040512	ENSMUSG00000092599	1700010K23Rik	-	RIKEN cDNA 1700010K23 gene	ncRNA
1222-2	chr11	94743742	94744962	+	666	Intergenic	Intergenic	16830	NM_001105561	217122	Mm.24063	NM_183153		Gm11545	A430060F13Rik|C86086	predicted gene 11545	protein-coding
1431	chr12	31910809	31912238	+	666	intron (NM_001163126, intron 19 of 22)	L1M3|LINE|L1	38722	NM_177993	73389	Mm.390461	NM_153198	ENSMUSG00000002996	Hbp1	1700058O05Rik|BE629963|C330012F01Rik|C86454	high mobility group box transcription factor 1	protein-coding
1160-5	chr6	86403431	86404589	+	666	promoter-TSS (NM_001164078)	promoter-TSS (NM_001164078)	-209	NM_001164079	21841	Mm.333219	NM_011585	ENSMUSG00000071337	Tia1	2310050N03Rik|AI256674|TIA-1|mTIA-1	cytotoxic granule-associated RNA binding protein 1	protein-coding
1177	chr1	71101759	71102934	+	666	intron (NM_007525, intron 1 of 10)	intron (NM_007525, intron 1 of 10)	626	NM_007525	12021	Mm.10764	NM_007525	ENSMUSG00000026196	Bard1	-	BRCA1 associated RING domain 1	protein-coding
1082-4	chr8	119314821	119315901	+	666	intron (NM_019707, intron 13 of 13)	(CAGAGA)n|Simple_repeat|Simple_repeat	-29177	NM_024219	68196	Mm.358714	NM_024219	ENSMUSG00000031839	Hsbp1	0610007A03Rik|AA408769|Hsp25	heat shock factor binding protein 1	protein-coding
1359-3	chr5	103891802	103893159	+	666	intron (NM_001359986, intron 1 of 10)	intron (NM_001359986, intron 1 of 10)	18779	NM_001359987	246293	Mm.179871	NM_178741	ENSMUSG00000029312	Klhl8	2310001P09Rik|D5Ertd431e	kelch-like 8	protein-coding
907-4	chr2	45169272	45170177	+	666	Intergenic	Intergenic	-52282	NM_001355288	24136	Mm.440702	NM_015753	ENSMUSG00000026872	Zeb2	9130203F04Rik|D130016B08Rik|SIP1|Zfhx1b|Zfx1b|Zfxh1b	zinc finger E-box binding homeobox 2	protein-coding
1362	chr17	33809810	33811170	+	666	promoter-TSS (NM_030697)	promoter-TSS (NM_030697)	-33	NM_001357162	80880	Mm.196330	NM_030697	ENSMUSG00000042099	Kank3	0610013D04Rik|Ankrd47|D17Ertd288e|NG28	KN motif and ankyrin repeat domains 3	protein-coding
1425-2	chr13	55512272	55513695	+	665	intron (NM_001114088, intron 1 of 12)	CpG	463	NM_026131	67399	Mm.275648	NM_026131	ENSMUSG00000021493	Pdlim7	LMP	PDZ and LIM domain 7	protein-coding
1041-5	chr2	140288604	140289643	+	665	intron (NM_001033296, intron 3 of 19)	MTD|LTR|ERVL-MaLR	100587	NM_001033296	228684	Mm.486585	NM_001033296	ENSMUSG00000074764	Sel1l2	Gm118	sel-1 suppressor of lin-12-like 2 (C. elegans)	protein-coding
1026-2	chr10	76707670	76708694	+	665	TTS (NM_009933)	TTS (NM_009933)	17862	NM_009933	12833	Mm.2509	NM_009933	ENSMUSG00000001119	Col6a1	AI747156|Col6a-1	collagen, type VI, alpha 1	protein-coding
1201	chr1	92696262	92697461	+	665	Intergenic	Intergenic	-48020	NM_153114	260301	Mm.219545	NM_153114	ENSMUSG00000044055	Otos	OTOSP	otospiralin	protein-coding
1316-7	chr5	136250349	136251663	+	665	intron (NM_001291239, intron 20 of 22)	B4A|SINE|B4	-6066	NM_018825	23921	Mm.425294	NM_018825	ENSMUSG00000005057	Sh2b2	Aps	SH2B adaptor protein 2	protein-coding
1173-4	chr3	8923087	8924258	+	665	exon (NM_025434, exon 1 of 3)	exon (NM_025434, exon 1 of 3)	185	NM_025434	66230	Mm.38460	NM_025434	ENSMUSG00000040269	Mrps28	1500012D08Rik|AW061224	mitochondrial ribosomal protein S28	protein-coding
1319	chr1	58543275	58544592	+	664	intron (NM_172513, intron 8 of 11)	intron (NM_172513, intron 8 of 11)	-38824	NM_008765	18393	Mm.3411	NM_008765	ENSMUSG00000026037	Orc2	AU041563|Orc2l	origin recognition complex, subunit 2	protein-coding
1075-5	chr12	111644679	111645752	+	664	intron (NM_001370744, intron 14 of 17)	ORR1A4-int|LTR|ERVL-MaLR	27123	NM_021273	12709	Mm.16831	NM_021273	ENSMUSG00000001270	Ckb	B-CK|Bck|CPK-B|Ck-3|Ck3|Ckbb	creatine kinase, brain	protein-coding
1025-8	chr2	165120761	165121784	+	664	intron (NM_174988, intron 10 of 11)	intron (NM_174988, intron 10 of 11)	-30522	NR_033448	72211	Mm.482899	NR_033448	ENSMUSG00000078935	1700025C18Rik	-	RIKEN cDNA 1700025C18 gene	ncRNA
1291-2	chr17	24603084	24604373	+	664	intron (NM_001039363, intron 28 of 39)	B1_Mur4|SINE|Alu	28899	NM_001286714	22084	Mm.30435	NM_011647	ENSMUSG00000002496	Tsc2	Nafld|Tcs2	TSC complex subunit 2	protein-coding
1017-2	chr2	173662978	173663993	+	664	intron (NM_024436, intron 2 of 6)	ORR1A1|LTR|ERVL-MaLR	3640	NM_024436	19334	Mm.275304	NM_024436	ENSMUSG00000027519	Rab22a	3732413A17Rik|AI662177|AW319644|AW550514|E130120E14Rik|Rab22	RAB22A, member RAS oncogene family	protein-coding
1134-7	chr9	15029556	15030688	+	663	intron (NM_019482, intron 1 of 4)	intron (NM_019482, intron 1 of 4)	15356	NM_019482	55991	Mm.142253	NM_019482	ENSMUSG00000031934	Panx1	AI847747	pannexin 1	protein-coding
1556-2	chr11	59416420	59417974	+	663	intron (NM_001356454, intron 3 of 3)	intron (NM_001356454, intron 3 of 3)	32837	NM_001356454	67826	Mm.26680	NM_144521	ENSMUSG00000009894	Snap47	1110031B06Rik|SNAP-47	synaptosomal-associated protein, 47	protein-coding
915-2	chr12	14701129	14702042	+	663	Intergenic	Lx8|LINE|L1	348804	NR_045960	73972	Mm.107680	NR_045960	ENSMUSG00000113644	4930448C13Rik	-	RIKEN cDNA 4930448C13 gene	ncRNA
1217-6	chr6	91927713	91928928	+	663	intron (NM_198668, intron 11 of 19)	intron (NM_198668, intron 11 of 19)	24087	NM_198668	381798	Mm.444785	NM_198668	ENSMUSG00000034063	4930590J08Rik	Gm1071	RIKEN cDNA 4930590J08 gene	protein-coding
1628	chr10	100305232	100306858	+	663	Intergenic	(CTG)n|Simple_repeat|Simple_repeat	-29631	NM_001166637	100043224	Mm.478257	NM_001166637	ENSMUSG00000094314	Gm4301	-	predicted gene 4301	protein-coding
1142	chr1	85838348	85839488	+	662	intron (NM_001355047, intron 5 of 9)	intron (NM_001355047, intron 5 of 9)	44901	NM_001355047	12283	Mm.26135	NM_133781	ENSMUSG00000036707	Cab39	AA408805|AA960512|C78372|MO25|MO25alpha	calcium binding protein 39	protein-coding
1065-2	chr18	7624610	7625673	+	662	intron (NM_001081287, intron 1 of 16)	intron (NM_001081287, intron 1 of 16)	1722	NM_001081287	75739	Mm.133293	NM_001081287	ENSMUSG00000057440	Mpp7	1110068J02Rik|2810038M04Rik|5430426E14Rik|AI415104|Gm955	membrane protein, palmitoylated 7 (MAGUK p55 subfamily member 7)	protein-coding
1274-2	chr18	80501549	80502821	+	662	Intergenic	Intergenic	-32493	NM_026295	67655	Mm.312893	NM_026295	ENSMUSG00000033323	Ctdp1	4930563P03Rik|AW553592	CTD (carboxy-terminal domain, RNA polymerase II, polypeptide A) phosphatase, subunit 1	protein-coding
1148	chr13	52742166	52743312	+	662	intron (NR_027893, intron 1 of 2)	intron (NR_027893, intron 1 of 2)	14466	NR_027893	105404	Mm.184173	NR_027893		BB123696	-	expressed sequence BB123696	ncRNA
998-8	chr9	96844313	96845309	+	662	intron (NM_001289645, intron 3 of 6)	intron (NM_001289645, intron 3 of 6)	44663	NM_001289645	235534	Mm.233031	NM_153420	ENSMUSG00000043587	Pxylp1	9430094M07Rik|Acpl2|BB177120|C130099A20Rik	2-phosphoxylose phosphatase 1	protein-coding
1152-5	chr3	34294294	34295444	+	662	Intergenic	Intergenic	-213515	NM_001286973	67713	Mm.274266	NM_026332	ENSMUSG00000027679	Dnajc19	1810055D05Rik|AA959924|Tim14	DnaJ heat shock protein family (Hsp40) member C19	protein-coding
1885	chr16	93463628	93465511	+	662	Intergenic	Intergenic	-5697	NR_040494	72264	Mm.396204	NR_040494	ENSMUSG00000099968	1700029J03Rik	-	RIKEN cDNA 1700029J03 gene	ncRNA
1404	chr15	85609502	85610904	+	662	Intergenic	Intergenic	-28382	NM_009528	22422	Mm.306946	NM_009528	ENSMUSG00000022382	Wnt7b	Wnt-7b	wingless-type MMTV integration site family, member 7B	protein-coding
1101-2	chr11	83563383	83564482	+	662	Intergenic	Intergenic	14704	NM_011338	20308	Mm.416125	NM_011338	ENSMUSG00000019122	Ccl9	CCF18|MRP-2|Scya10|Scya9	chemokine (C-C motif) ligand 9	protein-coding
1276-4	chr2	68287074	68288348	+	662	intron (NM_016866, intron 14 of 17)	intron (NM_016866, intron 14 of 17)	183039	NM_020283	26877	Mm.226435	NM_020283	ENSMUSG00000034780	B3galt1	beta3Gal-T1	UDP-Gal:betaGlcNAc beta 1,3-galactosyltransferase, polypeptide 1	protein-coding
1205-2	chr15	42587163	42588366	+	661	intron (NM_001286062, intron 1 of 8)	intron (NM_001286062, intron 1 of 8)	89213	NM_001286062	11600	Mm.309336	NM_009640	ENSMUSG00000022309	Angpt1	1110046O21Rik|Ang-1|Ang1	angiopoietin 1	protein-coding
1279-5	chr3	101604153	101605430	+	661	promoter-TSS (NM_144900)	promoter-TSS (NM_144900)	-84	NM_144900	11928	Mm.193670	NM_144900	ENSMUSG00000033161	Atp1a1	Atpa-1|BC010319	ATPase, Na+/K+ transporting, alpha 1 polypeptide	protein-coding
921-3	chr14	76701479	76702398	+	661	Intergenic	MER2B|DNA|TcMar-Tigger	24370	NR_015485	73272	Mm.116804	NR_015485	ENSMUSG00000101009	1700108F19Rik	1700020I02Rik|BB065030	RIKEN cDNA 1700108F19 gene	ncRNA
1218-5	chr14	63131959	63133175	+	661	intron (NM_007798, intron 1 of 9)	intron (NM_007798, intron 1 of 9)	10105	NM_007798	13030	Mm.236553	NM_007798	ENSMUSG00000021939	Ctsb	CB	cathepsin B	protein-coding
1183-4	chr18	60891230	60892411	+	661	Intergenic	Intergenic	-20171	NM_001038499	545260	Mm.20147	NM_001038499	ENSMUSG00000036412	Arsi	BC020108	arylsulfatase i	protein-coding
1125-9	chr8	70630856	70631979	+	660	exon (NM_001330687, exon 2 of 3)	exon (NM_001330687, exon 2 of 3)	678	NM_011819	23886	Mm.31325	NM_011819	ENSMUSG00000038508	Gdf15	MIC-1|NAG-1|SBF	growth differentiation factor 15	protein-coding
1254-4	chr3	86805243	86806495	+	660	intron (NM_001357460, intron 10 of 16)	intron (NM_001357460, intron 10 of 16)	115015	NM_001195499	70762	Mm.44490	NM_027539	ENSMUSG00000028078	Dclk2	6330415M09Rik|AU044875|CL2|CLICK2|Click-II|Dcamkl2	doublecortin-like kinase 2	protein-coding
1277	chr2	33916094	33917369	+	660	Intergenic	Intergenic	-28785	NM_175184	72543	Mm.254914	NM_175184	ENSMUSG00000038740	Mvb12b	2610200O14Rik|2610528K11Rik|AI414895|Fam125b	multivesicular body subunit 12B	protein-coding
1240-5	chr4	46777192	46778430	+	660	intron (NM_001081141, intron 7 of 18)	(TGGG)n|Simple_repeat|Simple_repeat	-127612	NM_198664	381605	Mm.331595	NM_198664	ENSMUSG00000039813	Tbc1d2	A630005A06Rik|BC022630|Gm1037|PARIS-1|PARIS1	TBC1 domain family, member 2	protein-coding
1136-5	chr18	60672408	60673542	+	660	Intergenic	Intergenic	9565	NR_045401	328963	Mm.417203	NR_045401		G630071F17Rik	G630071F17	RIKEN cDNA G630071F17 gene	ncRNA
1264-3	chr13	57940389	57941651	+	660	Intergenic	(CAG)n|Simple_repeat|Simple_repeat	-32688	NM_001166465	20745	Mm.379020	NM_009262	ENSMUSG00000056222	Spock1	Spock|Ticn1|testican	sparc/osteonectin, cwcv and kazal-like domains proteoglycan 1	protein-coding
1665	chr4	115115716	115117379	+	660	intron (NM_001003947, intron 8 of 11)	intron (NM_001003947, intron 8 of 11)	-17285	NR_131922	105244662	Mm.417697	NR_131922	ENSMUSG00000086896	Cyp4x1os	Gm12835	cytochrome P450, family 4, subfamily x, polypeptide 1, opposite strand	ncRNA
1889-2	chr15	86053512	86055399	+	659	Intergenic	Intergenic	-3240	NM_172611	223752	Mm.24442	NM_172611	ENSMUSG00000035900	Gramd4	9930016O13	GRAM domain containing 4	protein-coding
1143-3	chr14	121089135	121090276	+	659	intron (NM_134082, intron 1 of 26)	L1MC2|LINE|L1	54131	NM_134082	223254	Mm.223980	NM_134082	ENSMUSG00000025555	Farp1	AW228844|BC030329|Cdep	FERM, RhoGEF (Arhgef) and pleckstrin domain protein 1 (chondrocyte-derived)	protein-coding
1070	chr10	127621357	127622425	+	659	promoter-TSS (NM_008512)	promoter-TSS (NM_008512)	-743	NM_008512	16971	Mm.271854	NM_008512	ENSMUSG00000040249	Lrp1	A2mr|AI316852|CD91|Lrp|b2b1554Clo	low density lipoprotein receptor-related protein 1	protein-coding
1304-3	chr4	141372211	141373513	+	659	intron (NM_001085513, intron 1 of 6)	intron (NM_001085513, intron 1 of 6)	4670	NM_001085513	277743	Mm.294614	NM_001085513	ENSMUSG00000006218	Fam131c	Gm693	family with sequence similarity 131, member C	protein-coding
1302-3	chr2	168657873	168659173	+	659	intron (NM_001354978, intron 15 of 27)	intron (NM_001354978, intron 15 of 27)	-17764	NR_105971	102466784		NR_105971	ENSMUSG00000105496	Mir7004	mmu-mir-7004	microRNA 7004	ncRNA
1623-3	chr17	35120744	35122365	+	659	promoter-TSS (NM_001303445)	promoter-TSS (NM_001303445)	58	NM_001128597	81845	Mm.7405	NM_032460	ENSMUSG00000092417	Gpank1	Bat-4|Bat4|D17H6S54E|G5	G patch domain and ankyrin repeats 1	protein-coding
1312-3	chr6	29432803	29434113	+	659	5' UTR (NM_001311074, exon 1 of 47)	5' UTR (NM_001311074, exon 1 of 47)	202	NM_001311074	68794	Mm.39046	NM_026839	ENSMUSG00000068699	Flnc	1110055E19Rik|ABP-280|ABPL|Fln2	filamin C, gamma	protein-coding
1001	chr12	54733714	54734713	+	658	Intergenic	B3|SINE|B2	-38319	NM_025456	66266	Mm.156440	NM_025456	ENSMUSG00000054302	Eapp	1810011O16Rik	E2F-associated phosphoprotein	protein-coding
990-6	chr2	103760548	103761536	+	658	intron (NM_153126, intron 1 of 28)	CpG	228	NM_153126	98956	Mm.288005	NM_153126	ENSMUSG00000027185	Nat10	AI429152	N-acetyltransferase 10	protein-coding
1146	chr1	87078299	87079443	+	657	Intergenic	MMVL30-int|LTR|ERV1	11057	NM_007433	11650	Mm.195224	NM_007433	ENSMUSG00000026246	Alppl2	Akp5|Alpg|C77216|D1Ertd816e|EAP	alkaline phosphatase, placental-like 2	protein-coding
1943	chr19	7277903	7279844	+	657	intron (NM_001080388, intron 15 of 16)	intron (NM_001080388, intron 15 of 16)	10594	NM_001320554	104383	Mm.283859	NM_054048	ENSMUSG00000024968	Rcor2	1A13|AW122124|CoREST|Rcor|Rcor1	REST corepressor 2	protein-coding
1084-4	chr7	99091846	99092928	+	657	intron (NM_178635, intron 4 of 14)	L1MD|LINE|L1	48757	NM_178635	78610	Mm.323072	NM_178635	ENSMUSG00000035354	Uvrag	9530039D02Rik|AI648770|BB124205|Uvrag1|Uvragl	UV radiation resistance associated gene	protein-coding
1341-3	chr10	76236063	76237402	+	657	exon (NM_133182, exon 2 of 11)	exon (NM_133182, exon 2 of 11)	1133	NM_001077638	15468	Mm.32020	NM_133182	ENSMUSG00000020230	Prmt2	AI504737|Hrmt1l1	protein arginine N-methyltransferase 2	protein-coding
1248-5	chr18	34740481	34741727	+	657	intron (NM_009860, intron 9 of 14)	B2_Mm2|SINE|B2	10429	NM_009860	12532	Mm.286602	NM_009860	ENSMUSG00000044201	Cdc25c	Cdc25	cell division cycle 25C	protein-coding
1441	chr1	74028325	74029764	+	657	intron (NM_027884, intron 3 of 34)	intron (NM_027884, intron 3 of 34)	95504	NM_027884	21961	Mm.309975	NM_027884	ENSMUSG00000055322	Tns1	1110018I21Rik|1200014E20Rik|AI648117|E030018G17Rik|E030037J05Rik|Tns	tensin 1	protein-coding
1095-3	chr19	54261098	54262191	+	657	Intergenic	ORR1E|LTR|ERVL-MaLR	216385	NM_007417	11551	Mm.235195	NM_007417	ENSMUSG00000033717	Adra2a	AW122659|Adra-2|Adra-2a|alpha(2A)AR|alpha2-C10|alpha2A|alpha2A-AR	adrenergic receptor, alpha 2a	protein-coding
1277-2	chr3	101397805	101399080	+	657	intron (NM_207205, intron 2 of 10)	intron (NM_207205, intron 2 of 10)	21317	NM_207205	78908	Mm.257997	NM_207205	ENSMUSG00000042035	Igsf3	1700016K10Rik|2810035F16Rik|4833439O17Rik|mKIAA0466	immunoglobulin superfamily, member 3	protein-coding
1053-7	chr3	105059531	105060582	+	657	Intergenic	Intergenic	-6788	NM_029228	75269	Mm.307994	NM_029228	ENSMUSG00000051788	4930564D02Rik	-	RIKEN cDNA 4930564D02 gene	protein-coding
1421	chr15	85500418	85501837	+	656	intron (NM_001256072, intron 1 of 4)	G-rich|Low_complexity|Low_complexity	2100	NM_001256072	328577	Mm.212960	NM_001256072	ENSMUSG00000096607	7530416G11Rik	-	RIKEN cDNA 7530416G11 gene	protein-coding
1356-3	chr19	5844148	5845502	+	656	non-coding (NR_003513, exon 1 of 1)	non-coding (NR_003513, exon 1 of 1)	653	NR_131212	66961	Mm.281895	NR_003513	ENSMUSG00000092274	Neat1	2310043N10Rik|VINC	nuclear paraspeckle assembly transcript 1 (non-protein coding)	ncRNA
1049-10	chr4	108057161	108058208	+	656	intron (NM_011327, intron 13 of 15)	intron (NM_011327, intron 13 of 15)	-25594	NM_172874	242608	Mm.74710	NM_172874	ENSMUSG00000028600	Podn	9430070G18|Pcan|SLRR5A	podocan	protein-coding
1305-2	chr15	96439016	96440319	+	656	intron (NM_028148, intron 3 of 14)	intron (NM_028148, intron 3 of 14)	21176	NM_028148	72193	Mm.324474	NM_028148	ENSMUSG00000033228	Scaf11	1110061H03Rik|2610510E10Rik|AI462454|CASP11|SIP1|SRRP129|Sfrs2ip|Srsf2ip|mKIAA3013	SR-related CTD-associated factor 11	protein-coding
1177-5	chr3	62614137	62615312	+	656	Intergenic	B3|SINE|B2	-9284	NM_001356525	229357	Mm.95181	NM_177346	ENSMUSG00000043441	Gpr149	9630018L10Rik|Ieda|PGR10|R35	G protein-coupled receptor 149	protein-coding
965	chr17	24853832	24854795	+	656	intron (NM_024284, intron 3 of 8)	RMER4B|LTR|ERVK	3646	NM_001159626	14651	Mm.43784	NM_024284	ENSMUSG00000024158	Hagh	BC019817|Glo-2|Glo2|Rsp29	hydroxyacyl glutathione hydrolase	protein-coding
1295	chr10	61147345	61148638	+	656	promoter-TSS (NM_001316673)	promoter-TSS (NM_001316673)	-307	NM_001316674	20397	Mm.412319	NM_009163	ENSMUSG00000020097	Sgpl1	AI428538|D10Xrf456|S1PL|Spl	sphingosine phosphate lyase 1	protein-coding
1234-2	chr7	3644537	3645769	+	656	promoter-TSS (NM_146176)	promoter-TSS (NM_146176)	-116	NM_146176	232791	Mm.358731	NM_146176	ENSMUSG00000035632	Cnot3	A930039N10Rik	CCR4-NOT transcription complex, subunit 3	protein-coding
1159	chr12	23078469	23079626	+	655	Intergenic	LTRIS_Mus|LTR|ERV1	-68804	NR_015504	69732	Mm.391403	NM_028362	ENSMUSG00000073164	2410018L13Rik	2810480C08Rik	RIKEN cDNA 2410018L13 gene	ncRNA
1337-2	chr15	97894364	97895699	+	655	intron (NM_009504, intron 1 of 9)	intron (NM_009504, intron 1 of 9)	13265	NM_009504	22337	Mm.245084	NM_009504	ENSMUSG00000022479	Vdr	Nr1i1	vitamin D (1,25-dihydroxyvitamin D3) receptor	protein-coding
1190	chr1	123820105	123821293	+	655	intron (NM_199021, intron 3 of 25)	(CACAG)n|Simple_repeat|Simple_repeat	224860	NM_199021	269109	Mm.417716	NM_199021	ENSMUSG00000036815	Dpp10	6430601K09Rik|DPP X|Dprp3	dipeptidylpeptidase 10	protein-coding
1245-3	chr15	78849374	78850617	+	655	TTS (NM_025622)	TTS (NM_025622)	5534	NM_025622	107753	Mm.390793	NM_025622	ENSMUSG00000043501	Lgals2	2200008F12Rik|AI324147	lectin, galactose-binding, soluble 2	protein-coding
1027-5	chr17	25108885	25109910	+	655	intron (NM_001163661, intron 6 of 20)	intron (NM_001163661, intron 6 of 20)	6508	NM_027880	71718	Mm.288702	NM_027880	ENSMUSG00000024170	Telo2	1200003M09Rik|AI415602|Tel2|mKIAA0683	telomere maintenance 2	protein-coding
1211-3	chr3	87503685	87504894	+	654	Intergenic	Intergenic	-21289	NM_001083318	27049	Mm.219460	NM_012051	ENSMUSG00000003382	Etv3	AI414410|METS|Pe1	ets variant 3	protein-coding
1470-2	chr3	89867195	89868663	+	654	Intergenic	Intergenic	36559	NM_172530	214547	Mm.225	NM_172530	ENSMUSG00000046280	She	9430022A14	src homology 2 domain-containing transforming protein E	protein-coding
922-5	chr5	103167356	103168276	+	654	intron (NM_001081567, intron 2 of 13)	intron (NM_001081567, intron 2 of 13)	43518	NM_001081567	26414	Mm.39253	NM_009158	ENSMUSG00000046709	Mapk10	C230008H04Rik|JNK3|JNK3B1|JNK3B2|SAPK(beta)|Serk2|p493F12|p54bSAPK	mitogen-activated protein kinase 10	protein-coding
1310-2	chr2	120342808	120344116	+	654	intron (NM_001363054, intron 4 of 23)	intron (NM_001363054, intron 4 of 23)	9671	NR_027618	269338	Mm.246131	NM_147153	ENSMUSG00000027291	Vps39	A230065P22Rik|AW743070|Vam6|Vam6P|mVam6	VPS39 HOPS complex subunit	protein-coding
1304-4	chr7	16312839	16314141	+	654	intron (NM_133234, intron 2 of 3)	intron (NM_133234, intron 2 of 3)	3907	NM_133234	170770	Mm.7660	NM_133234	ENSMUSG00000002083	Bbc3	PUMA|PUMA/JFY1	BCL2 binding component 3	protein-coding
1087-2	chr17	24885779	24886864	+	654	promoter-TSS (NM_001163751)	promoter-TSS (NM_001163751)	29	NM_001355396	26426	Mm.36718	NM_011956	ENSMUSG00000039183	Nubp2	D17Wsu11e	nucleotide binding protein 2	protein-coding
1390-2	chr1	183094278	183095666	+	654	intron (NM_026866, intron 9 of 9)	intron (NM_026866, intron 9 of 9)	52585	NM_001278220	68897	Mm.327216	NM_026866	ENSMUSG00000030768	Disp1	1190008H24Rik|DispA	dispatched RND transporter family member 1	protein-coding
1077	chr10	71237541	71238616	+	654	promoter-TSS (NM_009360)	promoter-TSS (NM_009360)	-34	NM_009360	21780	Mm.229292	NM_009360	ENSMUSG00000003923	Tfam	AI661103|Hmgts|mtTFA|tsHMG	transcription factor A, mitochondrial	protein-coding
1453	chr10	69351664	69353115	+	654	intron (NM_007659, intron 1 of 7)	intron (NM_007659, intron 1 of 7)	523	NM_007659	12534	Mm.68442	NM_007659	ENSMUSG00000019942	Cdk1	Cdc2|Cdc2a|p34<CDC2>	cyclin-dependent kinase 1	protein-coding
1296-3	chr11	32834601	32835895	+	654	Intergenic	Intergenic	-10654	NM_027050	69351	Mm.65488	NM_027050	ENSMUSG00000020270	Smim23	1700008A04Rik	small integral membrane protein 23	protein-coding
1131-2	chr4	46094858	46095987	+	654	intron (NM_021883, intron 7 of 9)	intron (NM_021883, intron 7 of 9)	43053	NM_173033	272027	Mm.249594	NM_173033	ENSMUSG00000035495	Tstd2	3010020C06	thiosulfate sulfurtransferase (rhodanese)-like domain containing 2	protein-coding
1193-7	chr3	95023122	95024313	+	654	Intergenic	L1MB5|LINE|L1	-8260	NM_001357863	78266	Mm.389478	NM_030074	ENSMUSG00000019338	Zfp687	4931408L03Rik|Znf687|mKIAA1441	zinc finger protein 687	protein-coding
888-3	chr16	38196932	38197818	+	654	intron (NM_001347232, intron 7 of 11)	L2|LINE|L2	97449	NM_010936	18171	Mm.8509	NM_010936	ENSMUSG00000022809	Nr1i2	PXR|PXR.1|PXR.2|PXR1|SXR|mPXR	nuclear receptor subfamily 1, group I, member 2	protein-coding
1241-2	chr10	61266703	61267942	+	654	intron (NM_001081127, intron 2 of 21)	B4A|SINE|B4	6097	NM_001081127	237360	Mm.333252	NM_001081127	ENSMUSG00000059901	Adamts14	Adamts-14|TS14	a disintegrin-like and metallopeptidase (reprolysin type) with thrombospondin type 1 motif, 14	protein-coding
943	chr10	39471857	39472798	+	653	intron (NM_001122893, intron 3 of 13)	intron (NM_001122893, intron 3 of 13)	102528	NM_001122893	14360	Mm.4848	NM_008054	ENSMUSG00000019843	Fyn	AI448320|AW552119	Fyn proto-oncogene	protein-coding
1222-6	chr3	54648851	54650071	+	653	Intergenic	Intergenic	-43354	NR_152185	56790	Mm.486375	NM_019995	ENSMUSG00000027751	Supt20	AA667204|AI450544|D3Ertd300e|Fam48a|Supt20h|p38IP	suppressor of Ty 20	protein-coding
1067	chr1	132134741	132135806	+	653	intron (NM_008795, intron 1 of 15)	intron (NM_008795, intron 1 of 15)	4412	NM_008795	18557	Mm.28130	NM_008795	ENSMUSG00000026437	Cdk18	AA682070|Ctk18|Pctk3	cyclin-dependent kinase 18	protein-coding
1769	chr4	152990871	152992638	+	653	Intergenic	(TG)n|Simple_repeat|Simple_repeat	294214	NR_033138	330004	Mm.291863	NM_001033414		Gm833	-	predicted gene 833	ncRNA
1197-5	chr4	8953989	8955184	+	653	Intergenic	Intergenic	203262	NM_001355382	320790	Mm.138792	NM_001033395	ENSMUSG00000041235	Chd7	A730019I05Rik|Cycn|Cyn|Dz|Edy|Flo|GENA 47|GENA 60|Gena 52|Lda|Mt|Obt|Todo|WBE1|Whi|metis	chromodomain helicase DNA binding protein 7	protein-coding
882-6	chr6	82889820	82890700	+	653	Intergenic	Intergenic	-8407	NR_040520	69652	Mm.96357	NR_040520	ENSMUSG00000100291	2310069B03Rik	-	RIKEN cDNA 2310069B03 gene	ncRNA
1229-6	chr6	149188127	149189354	+	653	promoter-TSS (NM_001113424)	promoter-TSS (NM_001113424)	-28	NM_001113424	232566	Mm.209147	NM_001113424	ENSMUSG00000068250	Amn1	5830467E07Rik|A230083D09|C730024G19Rik	antagonist of mitotic exit network 1	protein-coding
1269	chr11	107055181	107056448	+	652	intron (NM_176850, intron 20 of 27)	intron (NM_176850, intron 20 of 27)	27591	NM_001163473	69066	Mm.40679	NM_001163473	ENSMUSG00000078607	1810010H24Rik	-	RIKEN cDNA 1810010H24 gene	protein-coding
1219-5	chr6	124904393	124905610	+	652	intron (NM_008479, intron 6 of 7)	intron (NM_008479, intron 6 of 7)	6704	NM_008479	16768	Mm.4528	NM_008479	ENSMUSG00000030124	Lag3	CD223|LAG-3|Ly66	lymphocyte-activation gene 3	protein-coding
1002-3	chr7	128603718	128604718	+	652	Intergenic	(CCA)n|Simple_repeat|Simple_repeat	-7147	NM_178641	101490	Mm.490344	NM_178641	ENSMUSG00000042105	Inpp5f	5830435P03Rik|AI115354|AW561896|SAC2|cI-27|hSAC2|mKIAA0966	inositol polyphosphate-5-phosphatase F	protein-coding
1037-4	chr19	47983840	47984875	+	652	intron (NM_001163267, intron 13 of 17)	intron (NM_001163267, intron 13 of 17)	46645	NM_001163267	381229	Mm.300553	NM_001163267	ENSMUSG00000046585	Cfap58	Ccdc147|Gm969	cilia and flagella associated protein 58	protein-coding
1116-5	chr3	103735603	103736717	+	652	exon (NM_133859, exon 3 of 3)	exon (NM_133859, exon 3 of 3)	1841	NM_133859	99543	Mm.211535	NM_133859	ENSMUSG00000027848	Olfml3	2810002E22Rik|AI115209|AW550633|HNOEL-iso|ONT3|mONT3	olfactomedin-like 3	protein-coding
1216	chr1	135343873	135345087	+	651	intron (NM_053106, intron 1 of 2)	(TA)n|Simple_repeat|Simple_repeat	19667	NM_053106	93689	Mm.180124	NM_053106	ENSMUSG00000048096	Lmod1	9530015K06Rik|SM-Lmod	leiomodin 1 (smooth muscle)	protein-coding
1372-2	chr1	125561053	125562423	+	651	intron (NM_028787, intron 1 of 15)	intron (NM_028787, intron 1 of 15)	736	NM_028787	74150	Mm.28654	NM_028787	ENSMUSG00000026342	Slc35f5	1300003P13Rik|AI646727	solute carrier family 35, member F5	protein-coding
1120-3	chr12	53226829	53227947	+	651	Intergenic	Intergenic	-21044	NM_001370963	27386	Mm.247044	NM_013780	ENSMUSG00000021010	Npas3	4930423H22Rik|bHLHe12	neuronal PAS domain protein 3	protein-coding
1394-3	chr16	17946959	17948351	+	651	Intergenic	Intergenic	-19436	NM_153150	13358	Mm.229291	NM_153150	ENSMUSG00000003528	Slc25a1	1300019P08Rik|2610100G11Rik|AI194714|Ctp|Dgsj|Slc20a3	solute carrier family 25 (mitochondrial carrier, citrate transporter), member 1	protein-coding
1185-4	chr3	66469703	66470886	+	651	Intergenic	Intergenic	-173457	NM_145820	72789	Mm.443526	NM_028357	ENSMUSG00000027831	Veph1	2810471M23Rik|Veph	ventricular zone expressed PH domain-containing 1	protein-coding
1111	chr13	84221571	84222680	+	651	promoter-TSS (NR_029419)	promoter-TSS (NR_029419)	50	NR_138587	320919	Mm.131386	NR_138587	ENSMUSG00000097292	A230107N01Rik	-	RIKEN cDNA A230107N01 gene	ncRNA
1141-3	chr16	18097014	18098153	+	650	Intergenic	Intergenic	-8393	NM_011172	19125	Mm.28456	NM_011172	ENSMUSG00000003526	Prodh	Pro-1|Pro1|Ym24d07	proline dehydrogenase	protein-coding
986-6	chr16	97446924	97447908	+	650	non-coding (NR_003520, exon 9 of 9)	non-coding (NR_003520, exon 9 of 9)	15489	NM_010846	17857	Mm.33996	NM_010846	ENSMUSG00000000386	Mx1	AI893580|Mx|Mx-1	MX dynamin-like GTPase 1	protein-coding
1356-4	chr3	9828608	9829962	+	650	intron (NM_001195031, intron 1 of 8)	MIRb|SINE|MIR	4394	NM_053182	94212	Mm.23897	NM_053182	ENSMUSG00000027508	Pag1	Cbp|F730007C19Rik|Pag	phosphoprotein associated with glycosphingolipid microdomains 1	protein-coding
1538-2	chr8	13677058	13678594	+	650	promoter-TSS (NM_009025)	promoter-TSS (NM_009025)	-239	NM_009025	19414	Mm.18517	NM_009025	ENSMUSG00000031453	Rasa3	AI326412|C86362|E130011G04|GAPIII|hlb381|scat	RAS p21 protein activator 3	protein-coding
1137-3	chr11	117398439	117399574	+	650	Intergenic	Intergenic	-15383	NR_132097	105827746	Mm.388009	NR_132097	ENSMUSG00000086588	Gm11729	-	predicted gene 11729	ncRNA
1184-3	chr12	104930425	104931607	+	650	3' UTR (NM_001042699, exon 19 of 19)	3' UTR (NM_001042699, exon 19 of 19)	-65940	NR_104435	94040	Mm.244078	NM_053155	ENSMUSG00000021097	Clmn	9330188N17Rik|AI428889|AI788815|mKIAA1188	calmin	protein-coding
1099	chr1	36307342	36308439	+	650	intron (NM_001172206, intron 1 of 6)	CpG	157	NM_001172205	214855	Mm.34316	NM_145996	ENSMUSG00000037447	Arid5a	D430024K22Rik|Mrf1	AT rich interactive domain 5A (MRF1-like)	protein-coding
1187-10	chr7	84457997	84459182	+	649	Intergenic	Intergenic	-48551	NM_007488	11864	Mm.38594	NM_007488	ENSMUSG00000015709	Arnt2	Hif-2b|bHLHe1|mKIAA0307	aryl hydrocarbon receptor nuclear translocator 2	protein-coding
1304-5	chr8	119591493	119592795	+	649	intron (NM_026648, intron 8 of 11)	intron (NM_026648, intron 8 of 11)	13096	NM_021441	21341	Mm.41977	NM_021441	ENSMUSG00000031832	Taf1c	Tafi95|mTAFI95	TATA-box binding protein associated factor, RNA polymerase I, C	protein-coding
966-2	chr11	3129367	3130331	+	649	non-coding (NR_003517, exon 6 of 7)	non-coding (NR_003517, exon 6 of 7)	5847	NR_003517	236604	Mm.247625	NM_001004146		Pisd-ps1	-	phosphatidylserine decarboxylase, pseudogene 1	pseudo
1254-3	chr2	173263094	173264346	+	649	intron (NM_022995, intron 1 of 3)	intron (NM_022995, intron 1 of 3)	12813	NM_022995	65112	Mm.73682	NM_022995	ENSMUSG00000038400	Pmepa1	2210418I02Rik|AW455466|Erg1.2|N4wbp4|Stag1|Tmepai	prostate transmembrane protein, androgen induced 1	protein-coding
1128-7	chr3	145640081	145641207	+	649	Intergenic	Intergenic	9341	NM_010516	16007	Mm.1231	NM_010516	ENSMUSG00000028195	Ccn1	AI325051|Cyr61|Igfbp10	cellular communication network factor 1	protein-coding
1128-2	chr11	32261660	32262786	+	648	intron (NM_001284359, intron 2 of 13)	intron (NM_001284359, intron 2 of 13)	5484	NM_181569	17168	Mm.263161	NM_181569	ENSMUSG00000020289	Nprl3	Aag|CGTHBA|HS-26|HS-40|Mare|Phg|Prox1|m(alpha)RE	nitrogen permease regulator-like 3	protein-coding
1221-4	chr2	30243249	30244468	+	648	intron (NM_177725, intron 2 of 3)	intron (NM_177725, intron 2 of 3)	6089	NM_177725	241296	Mm.389232	NM_177725	ENSMUSG00000007476	Lrrc8a	Lrrc8|SWELL1|ebo|mKIAA1437	leucine rich repeat containing 8A VRAC subunit A	protein-coding
1707	chr4	127326922	127328627	+	648	intron (NM_001160012, intron 1 of 1)	ID_B1|SINE|B4	1351	NM_008126	14620	Mm.90003	NM_008126	ENSMUSG00000042367	Gjb3	Cnx31|Cx31|D4Wsu144e|Gjb-3	gap junction protein, beta 3	protein-coding
1159-5	chr5	139504612	139505769	+	648	Intergenic	Intergenic	-18561	NR_040701	74973	Mm.141282	NR_040701	ENSMUSG00000106056	4930500L23Rik	-	RIKEN cDNA 4930500L23 gene	ncRNA
1242	chr15	78348587	78349827	+	648	TTS (NR_106137)	TTS (NR_106137)	608	NR_106138	102466845		NR_106138	ENSMUSG00000099059	Mir7676-2	Gm27790|mmu-mir-7676-2	microRNA 7676-2	ncRNA
1212-2	chr14	46563950	46565160	+	648	Intergenic	Intergenic	11296	NR_046459	100873094	Mm.318596	NR_046459	ENSMUSG00000085123	Rubie	Gm15219|Gm1584	RNA upstream of Bmp4 expressed in inner ear	ncRNA
1292-5	chr7	35802386	35803676	+	648	promoter-TSS (NM_177739)	promoter-TSS (NM_177739)	-42	NM_177739	668501	Mm.286296	NM_177739	ENSMUSG00000044452	Zfp507	1810022O10Rik|A230056M16Rik|AL024009|AU021817|BB105092|Gm480|Znf507|mKIAA1084	zinc finger protein 507	protein-coding
1025-3	chr10	127580579	127581602	+	648	intron (NM_008512, intron 20 of 88)	intron (NM_008512, intron 20 of 88)	40058	NM_008512	16971	Mm.271854	NM_008512	ENSMUSG00000040249	Lrp1	A2mr|AI316852|CD91|Lrp|b2b1554Clo	low density lipoprotein receptor-related protein 1	protein-coding
898-6	chr4	107889570	107890466	+	647	exon (NM_028754, exon 1 of 7)	exon (NM_028754, exon 1 of 7)	119	NM_028754	74098	Mm.274853	NM_028754	ENSMUSG00000028608	Czib	0610037L13Rik|1110008H16Rik	CXXC motif containing zinc binding protein	protein-coding
1414-2	chr5	3342855	3344267	+	647	promoter-TSS (NM_009873)	promoter-TSS (NM_009873)	-332	NM_009873	12571	Mm.31672	NM_009873	ENSMUSG00000040274	Cdk6	AI504062|Crk2	cyclin-dependent kinase 6	protein-coding
1076-9	chrX	81443090	81444164	+	647	intron (NM_173435, intron 1 of 3)	intron (NM_173435, intron 1 of 3)	14495	NM_173435	245492	Mm.109633	NM_173435	ENSMUSG00000060673	4930595M18Rik	-	RIKEN cDNA 4930595M18 gene	protein-coding
1199-4	chr17	89070677	89071874	+	647	intron (NM_013523, intron 2 of 9)	intron (NM_013523, intron 2 of 9)	129400	NM_013523	14309	Mm.57155	NM_013523	ENSMUSG00000032937	Fshr	-	follicle stimulating hormone receptor	protein-coding
1090-4	chr14	47355121	47356209	+	647	Intergenic	AT_rich|Low_complexity|Low_complexity	-18195	NM_010705	16854	Mm.248615	NM_010705	ENSMUSG00000050335	Lgals3	GBP|L-34|Mac-2|gal3	lectin, galactose binding, soluble 3	protein-coding
884	chr1	169033309	169034191	+	647	Intergenic	Intergenic	-14661	NR_105772	102466632		NR_105772	ENSMUSG00000098829	Mir6354	Gm27282|mmu-mir-6354	microRNA 6354	ncRNA
1273	chr1	171503236	171504507	+	647	exon (NM_019484, exon 1 of 1)	exon (NM_019484, exon 1 of 1)	393	NM_019484	56009	Mm.389208	NM_019484	ENSMUSG00000060244	Alyref2	C130042O11Rik|REF2|Refbp2	Aly/REF export factor 2	protein-coding
1206-2	chr14	55635013	55636217	+	647	promoter-TSS (NM_024267)	promoter-TSS (NM_024267)	69	NR_153401	75751	Mm.27546	NM_024267	ENSMUSG00000002319	Ipo4	8430408O15Rik|AA409693|Imp4a|RanBP4	importin 4	protein-coding
1074-2	chr3	87966794	87967866	+	647	Intergenic	RMER19A|LTR|ERVK	-3763	NM_016701	18008	Mm.331129	NM_016701	ENSMUSG00000004891	Nes	AA166324|C78523|ESTM46|Ifaprc2|Marc2|RC2	nestin	protein-coding
1372	chr1	86214476	86215846	+	647	intron (NM_030184, intron 19 of 24)	intron (NM_030184, intron 19 of 24)	60381	NM_001310702	78795	Mm.379264	NM_027456	ENSMUSG00000062590	Armc9	3830422A13Rik|4831423D23Rik|4930438O05Rik|5730415N24Rik	armadillo repeat containing 9	protein-coding
1359	chr10	127040699	127042056	+	647	promoter-TSS (NM_010792)	promoter-TSS (NM_010792)	17	NM_001205036	100504608	Mm.486142	NM_001205036	ENSMUSG00000080115	Eef1akmt3	EG546486|Fam119b|Gm16109|Mettl21b	EEF1A lysine methyltransferase 3	protein-coding
1205	chr1	16243704	16244907	+	647	intron (NM_001111272, intron 11 of 12)	intron (NM_001111272, intron 11 of 12)	138423	NM_133832	98711	Mm.274376	NM_133832	ENSMUSG00000025921	Rdh10	3110069K09Rik|4921506A21Rik|AI875664|AW549993|D1Ertd762e|m366Asp	retinol dehydrogenase 10 (all-trans)	protein-coding
1033-6	chr7	126700629	126701660	+	647	intron (NM_001301374, intron 6 of 10)	intron (NM_001301374, intron 6 of 10)	3076	NM_001301374	12721	Mm.290482	NM_009898	ENSMUSG00000030707	Coro1a	Clabp|Lmb3|TACO|p57	coronin, actin binding protein 1A	protein-coding
1103	chr16	10822925	10824026	+	647	Intergenic	RMER4B|LTR|ERVK	-11584	NM_001162932	223970	Mm.325777	NM_001033278	ENSMUSG00000037991	Rmi2	A630055G03Rik|Gm537|Gm929	RecQ mediated genome instability 2	protein-coding
1942	chr5	147706300	147708240	+	647	intron (NM_001363135, intron 1 of 12)	intron (NM_001363135, intron 1 of 12)	18741	NM_001363135	14254	Mm.389712	NM_010228	ENSMUSG00000029648	Flt1	AI323757|Flt-1|VEGFR-1|VEGFR1|sFlt1	FMS-like tyrosine kinase 1	protein-coding
1137-2	chr10	128302252	128303387	+	647	promoter-TSS (NM_001358822)	promoter-TSS (NM_001358822)	-516	NM_001252327	103135	Mm.244183	NM_133992	ENSMUSG00000005682	Pan2	1200014O24Rik|AI047843|AW742773|Usp52|mKIAA0710	PAN2 poly(A) specific ribonuclease subunit	protein-coding
1201-3	chr15	84484594	84485793	+	646	Intergenic	Intergenic	-38096	NM_001163145	72301	Mm.275387	NM_001163145	ENSMUSG00000062760	Shisal1	1810041L15Rik|Kiaa1644	shisa like 1	protein-coding
1336-2	chr17	12289167	12290501	+	646	intron (NM_001357722, intron 1 of 25)	(CAAGA)n|Simple_repeat|Simple_repeat	28826	NM_011948	26407	Mm.28587	NM_011948	ENSMUSG00000014426	Map3k4	D17Rp17|D17Rp17e|MAPKKK4|MEKK 4|MTK1|Mek4b|Mekk4|RP17|Rp17a|Tas|mKIAA0213	mitogen-activated protein kinase kinase kinase 4	protein-coding
1099-6	chr9	88858518	88859615	+	646	promoter-TSS (NR_037983)	promoter-TSS (NR_037983)	-196	NR_037983	319673	Mm.149040	NR_037982	ENSMUSG00000097177	9330159M07Rik	1700096K11Rik|mU50hg-a	RIKEN cDNA 9330159M07 gene	ncRNA
1180-6	chr18	65780207	65781385	+	646	Intergenic	Intergenic	-19782	NM_025468	66286	Mm.27800	NM_025468	ENSMUSG00000024516	Sec11c	1810029G24Rik|Sec11l3	SEC11 homolog C, signal peptidase complex subunit	protein-coding
1082	chr17	30197002	30198082	+	646	intron (NM_001356265, intron 5 of 5)	intron (NM_001356265, intron 5 of 5)	192503	NM_001356265	21769	Mm.220972	NM_148926	ENSMUSG00000044477	Zfand3	AW539211|TEG-27|Tex27	zinc finger, AN1-type domain 3	protein-coding
1132-4	chr17	46429787	46430917	+	646	intron (NM_053250, intron 4 of 7)	intron (NM_053250, intron 4 of 7)	1410	NM_181664	114570	Mm.25168	NM_053250	ENSMUSG00000023968	Crip3	TLP|TLP-A|TLP-B|Tlmp	cysteine-rich protein 3	protein-coding
1145-3	chr2	34773997	34775140	+	646	exon (NM_022310, exon 6 of 8)	exon (NM_022310, exon 6 of 8)	2478	NM_022310	14828	Mm.330160	NM_022310	ENSMUSG00000026864	Hspa5	AL022860|AU019543|Bip|D2Wsu141e|D2Wsu17e|Grp78|Hsce70|SEZ-7|Sez7|baffled|mBiP	heat shock protein 5	protein-coding
1500	chr11	103116858	103118356	+	646	exon (NM_138753, exon 1 of 1)	exon (NM_138753, exon 1 of 1)	1282	NM_138753	192231	Mm.8763	NM_138753	ENSMUSG00000048878	Hexim1	7330426E13Rik|CLP-1|Clp1|HIS1	hexamethylene bis-acetamide inducible 1	protein-coding
1360-3	chr2	181496470	181497828	+	646	promoter-TSS (NM_001291204)	promoter-TSS (NM_001291204)	7	NM_001291204	66314	Mm.136648	NM_025482	ENSMUSG00000000827	Tpd52l2	2810411G23Rik|AU016537|C86069|D54	tumor protein D52-like 2	protein-coding
1015-4	chr3	9711209	9712222	+	645	intron (NM_053182, intron 2 of 7)	intron (NM_053182, intron 2 of 7)	-101630	NM_133218	170753	Mm.212908	NM_133218	ENSMUSG00000040209	Zfp704	C030026M03|C030034L19Rik|Gig1|Znf704	zinc finger protein 704	protein-coding
1103-2	chr2	84588849	84589950	+	645	Intergenic	(CTG)n|Simple_repeat|Simple_repeat	60081	NM_001355065	12388	Mm.35738	NM_007615	ENSMUSG00000034101	Ctnnd1	AA409437|AU019353|Catns|Ctnnd|P120|mKIAA0384	catenin (cadherin associated protein), delta 1	protein-coding
1241	chr1	33534594	33535833	+	645	intron (NM_008922, intron 7 of 13)	intron (NM_008922, intron 7 of 13)	134581	NM_008922	19076	Mm.27705	NM_008922	ENSMUSG00000026134	Prim2	AI323589	DNA primase, p58 subunit	protein-coding
1262-2	chr18	75386866	75388126	+	645	intron (NM_001042660, intron 3 of 3)	intron (NM_001042660, intron 3 of 3)	20131	NM_001042660	17131	Mm.34407	NM_008543	ENSMUSG00000025880	Smad7	Madh7	SMAD family member 7	protein-coding
1025-4	chr17	85753045	85754068	+	644	Intergenic	(CAG)n|Simple_repeat|Simple_repeat	-65302	NM_011380	20472	Mm.5039	NM_011380	ENSMUSG00000024134	Six2	-	sine oculis-related homeobox 2	protein-coding
1180	chr10	128525240	128526418	+	644	promoter-TSS (NM_011843)	promoter-TSS (NM_011843)	30	NM_011843	23943	Mm.66056	NM_011843	ENSMUSG00000025366	Esyt1	Fam62a|Mbc2|vp115	extended synaptotagmin-like protein 1	protein-coding
1390	chr1	5017559	5018947	+	644	intron (NM_001177795, intron 2 of 5)	intron (NM_001177795, intron 2 of 5)	481	NM_001290372	58175	Mm.103771	NM_021374	ENSMUSG00000002459	Rgs20	2900073E09Rik|Rgsz1	regulator of G-protein signaling 20	protein-coding
1039-8	chr9	44479736	44480773	+	644	Intergenic	Intergenic	-2571	NM_001357490	80288	Mm.370270	NM_030256	ENSMUSG00000063382	Bcl9l	B9L|BC003321|BCL9-2|DLNB11	B cell CLL/lymphoma 9-like	protein-coding
1078-6	chr9	72415154	72416230	+	644	Intergenic	Intergenic	-5825	NR_152222	100502819	Mm.392319	NR_152222	ENSMUSG00000097211	BC065403	A930005F02Rik	cDNA sequence BC065403	ncRNA
1193-6	chr3	31685689	31686880	+	644	Intergenic	(CAGAGA)n|Simple_repeat|Simple_repeat	-216419	NM_028231	72413	Mm.64790	NM_028231	ENSMUSG00000037610	Kcnmb2	2700049B16Rik|3110031N04Rik	potassium large conductance calcium-activated channel, subfamily M, beta member 2	protein-coding
1318-3	chr17	26202999	26204315	+	644	exon (NM_001081069, exon 4 of 17)	exon (NM_001081069, exon 4 of 17)	716	NM_001081069	50782	Mm.109840	NM_001081069	ENSMUSG00000024186	Rgs11	C78048	regulator of G-protein signaling 11	protein-coding
1045-5	chr17	21649544	21650587	+	643	promoter-TSS (NM_001166497)	promoter-TSS (NM_001166497)	-546	NM_001357098	73229	Mm.296733	NM_001166497	ENSMUSG00000035868	Zfp983	3110052M02Rik|mszf57|mszf71	zinc finger protein 983	protein-coding
1172-4	chr17	45554994	45556164	+	643	promoter-TSS (NM_008690)	promoter-TSS (NM_008690)	-121	NM_008690	18037	Mm.57043	NM_008690	ENSMUSG00000023947	Nfkbie	I-kappa-B-epsilon|IKBE|IkB-E|NF-kappa-BIE|ikB-epsilon	nuclear factor of kappa light polypeptide gene enhancer in B cells inhibitor, epsilon	protein-coding
1316-5	chr2	156429591	156430905	+	643	intron (NM_013510, intron 1 of 21)	intron (NM_013510, intron 1 of 21)	9157	NM_001368803	13821	Mm.20852	NM_013510	ENSMUSG00000027624	Epb41l1	4.1N|Epb4.1l1|NBL1|mKIAA0338	erythrocyte membrane protein band 4.1 like 1	protein-coding
1313	chr1	181552143	181553454	+	642	Intergenic	Intergenic	-41347	NM_207280	403180	Mm.220754	NM_207280	ENSMUSG00000050625	Ccdc121	6530421E24Rik|Gm755	coiled-coil domain containing 121	protein-coding
1267	chr11	102924476	102925741	+	642	promoter-TSS (NM_197959)	promoter-TSS (NM_197959)	16	NM_197959	70218	Mm.32084	NM_197959	ENSMUSG00000051378	Kif18b	3000004C01Rik	kinesin family member 18B	protein-coding
1352	chr10	59950755	59952105	+	642	exon (NM_029083, exon 2 of 3)	exon (NM_029083, exon 2 of 3)	340	NM_029083	74747	Mm.21697	NM_029083	ENSMUSG00000020108	Ddit4	5830413E08Rik|AA415483|REDD1|Rtp801|dig2	DNA-damage-inducible transcript 4	protein-coding
1097	chr10	19014823	19015918	+	642	promoter-TSS (NM_009397)	promoter-TSS (NM_009397)	40	NM_009397	21929	Mm.116683	NM_009397	ENSMUSG00000019850	Tnfaip3	A20|Tnfip3	tumor necrosis factor, alpha-induced protein 3	protein-coding
1213	chr1	78537032	78538243	+	642	intron (NM_026713, intron 6 of 6)	intron (NM_026713, intron 6 of 6)	26577	NM_026713	68393	Mm.41325	NM_026713	ENSMUSG00000012187	Mogat1	0610030A14Rik|1110064N14Rik|Dgat2l|Dgat2l1|MGAT1|WI1-2612I11.1|mDC2	monoacylglycerol O-acyltransferase 1	protein-coding
1190-4	chr2	152226343	152227531	+	642	promoter-TSS (NM_007788)	promoter-TSS (NM_007788)	97	NM_007788	12995	Mm.23692	NM_007788	ENSMUSG00000074698	Csnk2a1	CK2|Csnk2a1-rs4	casein kinase 2, alpha 1 polypeptide	protein-coding
1111-2	chr15	76870631	76871740	+	642	5' UTR (NM_001007568, exon 1 of 4)	5' UTR (NM_001007568, exon 1 of 4)	250	NM_001007568	71591	Mm.38195	NM_001007568	ENSMUSG00000022526	Zfp251	9130001M19Rik|AV339307	zinc finger protein 251	protein-coding
1052-4	chr18	68691531	68692581	+	642	Intergenic	MT-int|LTR|ERVL-MaLR	-47344	NR_105774	102465183		NR_105774	ENSMUSG00000099300	Mir6356	Gm27461|mmu-mir-6356	microRNA 6356	ncRNA
1257-3	chr2	25210536	25211791	+	641	exon (NM_021393, exon 1 of 13)	exon (NM_021393, exon 1 of 13)	326	NM_021393	58202	Mm.116418	NM_021393	ENSMUSG00000013465	Nelfb	A730008L03Rik|AB041607|AI663983|Cobra1|Nelf-b	negative elongation factor complex member B	protein-coding
1165-3	chr12	25165173	25166336	+	641	Intergenic	L2c|LINE|L2	36580	NR_045844	432641	Mm.112955	NR_045844		Gm17746	-	predicted gene, 17746	ncRNA
1245-4	chr5	36785714	36786957	+	641	Intergenic	Intergenic	10419	NM_026242	67568	Mm.332336	NM_026242	ENSMUSG00000055302	Mrfap1	9130413I22Rik|AL022827|Pam14	Morf4 family associated protein 1	protein-coding
1201-6	chr7	19228049	19229248	+	641	intron (NM_207525, intron 1 of 1)	CpG	259	NM_207525	403187	Mm.239583	NM_207525	ENSMUSG00000052214	Opa3	D630048P19Rik|Gm1425|Gm472	optic atrophy 3	protein-coding
1247-2	chr15	92979216	92980461	+	641	Intergenic	Intergenic	295341	NM_001357006	223827	Mm.22819	NM_001033275	ENSMUSG00000036197	Gxylt1	Glt8d3|Gm1228|Gm87	glucoside xylosyltransferase 1	protein-coding
1184-11	chr9	7857271	7858453	+	641	intron (NM_007464, intron 4 of 8)	intron (NM_007464, intron 4 of 8)	15308	NM_007464	11796	Mm.2026	NM_007464	ENSMUSG00000032000	Birc3	AW107670|Api1|Api2|Birc2|C-IAP2|HIAP2|IAP1|IAP2|MIAP1|MIAP2|MIHB|MIHC|RNF49|cIAP-1|cIAP-2|cIAP1|cIAP2	baculoviral IAP repeat-containing 3	protein-coding
1079-3	chr15	83474237	83475314	+	641	Intergenic	MTC|LTR|ERVL-MaLR	-10169	NM_001358643	23970	Mm.23978	NM_011862	ENSMUSG00000016664	Pacsin2	AI197433	protein kinase C and casein kinase substrate in neurons 2	protein-coding
1171-3	chr3	89417860	89419029	+	641	promoter-TSS (NM_011368)	promoter-TSS (NM_011368)	-107	NM_011368	20416	Mm.86595	NM_011368	ENSMUSG00000042626	Shc1	Shc|ShcA|p66|p66shc	src homology 2 domain-containing transforming protein C1	protein-coding
1270	chr1	13352639	13353907	+	641	intron (NM_008678, intron 1 of 22)	intron (NM_008678, intron 1 of 22)	19156	NM_001302702	17978	Mm.2537	NM_008678	ENSMUSG00000005886	Ncoa2	D1Ertd433e|GRIP-1|Grip1|KAT13C|NCoA-2|SRC-2|TIF2|bHLHe75	nuclear receptor coactivator 2	protein-coding
1144-6	chr8	85074518	85075660	+	641	TTS (NM_001039514)	TTS (NM_001039514)	3332	NM_001039514	330817	Mm.193086	NM_201408	ENSMUSG00000060038	Dhps	Dhs	deoxyhypusine synthase	protein-coding
1215-3	chr3	36295642	36296855	+	640	Intergenic	Intergenic	-73973	NM_198192	229214	Mm.330975	NM_198192	ENSMUSG00000058400	Qrfpr	AQ27|Gpr103|SP9155	pyroglutamylated RFamide peptide receptor	protein-coding
1109-4	chr3	108088752	108089859	+	640	Intergenic	Intergenic	-2639	NM_001289719	109674	Mm.274335	NM_028779	ENSMUSG00000027889	Ampd2	1200014F01Rik|AI552571|Ampd-2|m4521Dajl	adenosine monophosphate deaminase 2	protein-coding
1055-6	chr2	120515666	120516719	+	640	intron (NM_011743, intron 15 of 21)	intron (NM_011743, intron 15 of 21)	39283	NM_001109761	12335	Mm.458021	NM_007601	ENSMUSG00000079110	Capn3	AI323605|Capa-3|Capa3|Lp82|p94	calpain 3	protein-coding
1365-3	chr4	129032091	129033454	+	640	Intergenic	Intergenic	-25372	NM_001368763	75234	Mm.259672	NM_029219	ENSMUSG00000028793	Rnf19b	4930534K13Rik|4930555L03Rik|Ibrdc3	ring finger protein 19B	protein-coding
1211-6	chr8	11214366	11215575	+	640	intron (NR_133670, intron 40 of 52)	intron (NR_133670, intron 40 of 52)	-97835	NM_009932	12827	Mm.181021	NM_009932	ENSMUSG00000031503	Col4a2	Col4a-2	collagen, type IV, alpha 2	protein-coding
1055-2	chr11	107189293	107190346	+	640	promoter-TSS (NM_133702)	promoter-TSS (NM_133702)	-438	NM_001161329	68979	Mm.294617	NM_133702	ENSMUSG00000018433	Nol11	1500002M01Rik|AU015220|AU019874	nucleolar protein 11	protein-coding
1101-9	chr4	155215146	155216245	+	640	intron (NM_011385, intron 1 of 6)	intron (NM_011385, intron 1 of 6)	6840	NM_011385	20481	Mm.28520	NM_011385	ENSMUSG00000029050	Ski	2310012I02Rik|2610001A11Rik|AA062172|AA589460|BC004088	ski sarcoma viral oncogene homolog (avian)	protein-coding
1199-6	chrX	10717070	10718267	+	640	5' UTR (NM_026524, exon 1 of 2)	5' UTR (NM_026524, exon 1 of 2)	303	NM_001166635	68041	Mm.29429	NM_026524	ENSMUSG00000008035	Mid1ip1	3110038L01Rik|Mig12|S14R	Mid1 interacting protein 1 (gastrulation specific G12-like (zebrafish))	protein-coding
1053-3	chr11	59458715	59459766	+	640	TTS (NM_001205068)	TTS (NM_001205068)	9195	NM_001205068	194952	Mm.295954	NM_178659	ENSMUSG00000036819	Jmjd4	6430559I23	jumonji domain containing 4	protein-coding
1385	chr11	116054210	116055593	+	640	exon (NM_001286006, exon 11 of 16)	exon (NM_001286006, exon 11 of 16)	23060	NM_001009573	70450	Mm.259460	NM_001009573	ENSMUSG00000057948	Unc13d	2610108D09Rik|Jinx|Munc13-4|mFLJ00067	unc-13 homolog D	protein-coding
1010	chr11	107154925	107155933	+	640	Intergenic	RMER19A|LTR|ERVK	-1979	NM_001308498	105734734		NM_001308498		Gm11715	-	predicted gene 11715	protein-coding
1167-3	chr6	127025011	127026176	+	640	TTS (NM_010204)	TTS (NM_010204)	10051	NM_010204	14177	Mm.3403	NM_010204	ENSMUSG00000000183	Fgf6	Fgf-6|HSTF-2	fibroblast growth factor 6	protein-coding
1318	chr1	108092033	108093349	+	639	Intergenic	Lx3A|LINE|L1	175432	NR_102307	319596	Mm.136054	NR_102306	ENSMUSG00000100457	D830032E09Rik	-	RIKEN cDNA D830032E09 gene	ncRNA
1384-2	chr2	32693571	32694953	+	639	promoter-TSS (NM_010236)	promoter-TSS (NM_010236)	-87	NM_010236	14287	Mm.3830	NM_010236	ENSMUSG00000009566	Fpgs	AA408187	folylpolyglutamyl synthetase	protein-coding
1504-3	chr6	83400675	83402177	+	639	promoter-TSS (NR_105793)	promoter-TSS (NR_105793)	-324	NR_105793	102465194		NR_105793	ENSMUSG00000099045	Mir6374	Gm27292|mmu-mir-6374	microRNA 6374	ncRNA
1158	chr1	75436258	75437414	+	639	exon (NM_001357170, exon 2 of 13)	exon (NM_001357170, exon 2 of 13)	900	NM_001357169	69080	Mm.23951	NM_133708	ENSMUSG00000033021	Gmppa	1810012N01Rik	GDP-mannose pyrophosphorylase A	protein-coding
1452-3	chr7	143685656	143687106	+	639	promoter-TSS (NM_001308111)	promoter-TSS (NM_001308111)	-506	NR_131763	79201	Mm.290780	NM_024290	ENSMUSG00000037613	Tnfrsf23	SOB|TNFRSFH23|Tnfrh1|Tnfrsf1al1|mDcTRAILR1|mSOB	tumor necrosis factor receptor superfamily, member 23	protein-coding
873-4	chr8	82955362	82956233	+	639	intron (NM_177378, intron 1 of 6)	intron (NM_177378, intron 1 of 6)	92441	NM_177378	330812	Mm.491438	NM_177378	ENSMUSG00000047747	Rnf150	A630007N06Rik|C030044C12Rik|Greul5|mKIAA1214	ring finger protein 150	protein-coding
1043-5	chr6	145950668	145951709	+	639	intron (NM_010656, intron 1 of 2)	intron (NM_010656, intron 1 of 2)	17066	NM_010656	16651	Mm.49689	NM_010656	ENSMUSG00000030255	Sspn	Krag	sarcospan	protein-coding
1328-3	chr18	26005763	26007089	+	639	Intergenic	Intergenic	-252269	NM_001362334	108013	Mm.266435	NM_133195	ENSMUSG00000024268	Celf4	A230070D14Rik|BRUNOL-4|Brul4|Brunol4|C130060B05Rik	CUGBP, Elav-like family member 4	protein-coding
1029-11	chrX	80733404	80734431	+	639	Intergenic	Intergenic	-336727	NM_138751	192216	Mm.490421	NM_138751	ENSMUSG00000025666	Tmem47	3010015F07Rik|AI115536|BCMP1|Tm4sf10	transmembrane protein 47	protein-coding
898-4	chr2	166384381	166385277	+	639	Intergenic	Intergenic	-62622	NR_015558	319684	Mm.399746	NR_015558		5031425F14Rik	-	RIKEN cDNA 5031425F14 gene	ncRNA
880	chr12	86972652	86973530	+	639	Intergenic	Intergenic	15585	NM_001080943	238331	Mm.185890	NM_001080943	ENSMUSG00000048483	Zdhhc22	Gm262	zinc finger, DHHC-type containing 22	protein-coding
1190-7	chr7	44848007	44849195	+	639	promoter-TSS (NM_026270)	promoter-TSS (NM_026270)	478	NM_001042655	233204	Mm.27567	NM_144924	ENSMUSG00000038520	Tbc1d17	BC017607	TBC1 domain family, member 17	protein-coding
1338	chr10	45311143	45312479	+	638	intron (NM_024286, intron 1 of 3)	intron (NM_024286, intron 1 of 3)	-22395	NR_155869	102638854		NR_155869		Gm15934	-	predicted gene 15934	ncRNA
1105-9	chr8	83728667	83729770	+	638	intron (NM_011925, intron 8 of 19)	intron (NM_011925, intron 8 of 19)	-5234	NR_106188	102465897		NR_106188	ENSMUSG00000098465	Mir1668	Gm27590|mmu-mir-1668	microRNA 1668	ncRNA
1193-3	chr15	79726990	79728181	+	638	exon (NM_001205346, exon 14 of 18)	exon (NM_001205346, exon 14 of 18)	14951	NM_194342	223697	Mm.202715	NM_194342	ENSMUSG00000042524	Sun2	B230369L08Rik|C030011B15|Unc84b	Sad1 and UNC84 domain containing 2	protein-coding
1108-5	chr2	165191691	165192797	+	638	intron (NM_174988, intron 1 of 11)	intron (NM_174988, intron 1 of 11)	42493	NM_174988	104010	Mm.151819	NM_174988	ENSMUSG00000053166	Cdh22	-	cadherin 22	protein-coding
1285	chr10	71343947	71345230	+	638	intron (NM_134007, intron 1 of 2)	CpG	261	NM_134007	52637	Mm.254114	NM_134007	ENSMUSG00000037710	Cisd1	AU043990|AW743335|D10Ertd214e|Zcd1|mitoNEET	CDGSH iron sulfur domain 1	protein-coding
1081-3	chr11	79022687	79023766	+	638	promoter-TSS (NR_045873)	promoter-TSS (NR_045873)	-371	NR_045873	790910	Mm.440410	NR_045873		Gm11201	-	predicted gene 11201	ncRNA
1389-2	chr12	21195732	21197119	+	638	intron (NM_001004364, intron 3 of 26)	intron (NM_001004364, intron 3 of 26)	84669	NM_001135192	211914	Mm.358946	NM_001004364	ENSMUSG00000052632	Asap2	6530401G17Rik|Ddef2|Gm1523|Gm592|PAG3|PAP	ArfGAP with SH3 domain, ankyrin repeat and PH domain 2	protein-coding
1194-4	chr8	12582835	12584027	+	638	intron (NM_001357297, intron 2 of 6)	MTE-int|LTR|ERVL-MaLR	10395	NM_024279	78634	Mm.116871	NM_024279	ENSMUSG00000010435	Spaca7	1700094C09Rik	sperm acrosome associated 7	protein-coding
1280-4	chr17	34030669	34031947	+	637	promoter-TSS (NM_001205214)	promoter-TSS (NM_001205214)	382	NM_008202	14977	Mm.18556	NM_008202	ENSMUSG00000024327	Slc39a7	AA408174|AI117660|AL024048|H-2Ke4|H2-Ke4|Ke-4|Ke4|Ring5|Zip7	solute carrier family 39 (zinc transporter), member 7	protein-coding
1184-5	chr14	27507916	27509098	+	637	promoter-TSS (NM_177111)	promoter-TSS (NM_177111)	-47	NM_177111	320234	Mm.247767	NM_177111	ENSMUSG00000046753	Ccdc66	E230015L20Rik	coiled-coil domain containing 66	protein-coding
1132	chr11	79086895	79088025	+	637	intron (NM_013571, intron 1 of 17)	B4A|SINE|B4	-27624	NM_001348207	16706	Mm.4745	NM_013571	ENSMUSG00000018334	Ksr1	AW492498|B-KSR1|D11Bhm183e|D11Bhm184e|Ksr|RSU2|hb|mKSR1	kinase suppressor of ras 1	protein-coding
1196-2	chr15	84669015	84670209	+	637	intron (NM_001346662, intron 1 of 8)	intron (NM_001346662, intron 1 of 8)	6406	NM_001346662	109270	Mm.291372	NM_146061	ENSMUSG00000036106	Prr5	AU043908|Arhgap8|C030017C09Rik|C78947|Protor-1|Protor1	proline rich 5 (renal)	protein-coding
1436-3	chr15	31366628	31368062	+	637	exon (NM_026153, exon 1 of 2)	exon (NM_026153, exon 1 of 2)	414	NM_001357923	67434	Mm.102470	NM_026153	ENSMUSG00000022237	Ankrd33b	0610012A05Rik|3021401C12Rik|5730557B15Rik	ankyrin repeat domain 33B	protein-coding
1270-2	chr1	88366853	88368121	+	636	intron (NM_134252, intron 22 of 26)	ORR1E|LTR|ERVL-MaLR	-39523	NM_029269	75396	Mm.173058	NM_029269	ENSMUSG00000026295	Spp2	0610038O04Rik|pp-24|spp24	secreted phosphoprotein 2	protein-coding
1209-6	chr7	137437055	137438262	+	636	promoter-TSS (NM_001348093)	promoter-TSS (NM_001348093)	-16	NR_033611	620016	Mm.388932	NR_033611	ENSMUSG00000100863	Gm12669	-	glutaredoxin 3 pseudogene	pseudo
2021-02-01	chr19	46327878	46329897	+	636	TTS (NM_001164294)	TTS (NM_001164294)	703	NM_133694	68431	Mm.19973	NM_133694	ENSMUSG00000025226	Fbxl15	0710008C12Rik|Fbxo37	F-box and leucine-rich repeat protein 15	protein-coding
872-3	chr8	122110336	122111206	+	636	Intergenic	Intergenic	-119503	NM_001362883	195209	Mm.102191	NM_001362883		Zfp469	Gm22	zinc finger protein 469	protein-coding
1002	chr1	191223940	191224940	+	636	promoter-TSS (NR_151547)	promoter-TSS (NR_151547)	-14	NR_151547	100504360	Mm.16927	NM_001033188		D730003I15Rik	AU020850	RIKEN cDNA D730003I15 gene	ncRNA
1053-6	chr15	89309422	89310473	+	636	intron (NM_001081030, intron 1 of 39)	intron (NM_001081030, intron 1 of 39)	-4215	NR_105924	102465981		NR_105924	ENSMUSG00000098442	Mir6959	Gm27807|mmu-mir-6959	microRNA 6959	ncRNA
1261-2	chr18	21333559	21334818	+	635	Intergenic	Lx7|LINE|L1	-34049	NM_001033445	381126	Mm.312276	NM_001033445	ENSMUSG00000042680	Garem1	C86169|Fam59a|Garem|Gm944|mKIAA4238	GRB2 associated regulator of MAPK1 subtype 1	protein-coding
1294	chr17	35262264	35263556	+	635	promoter-TSS (NM_001267808)	promoter-TSS (NM_001267808)	-184	NM_010380	14964	Mm.439675	NM_010380	ENSMUSG00000073411	H2-D1	H-2D|H2-D|H2-K1	histocompatibility 2, D region locus 1	protein-coding
1129-3	chr15	6564426	6565553	+	635	Intergenic	Intergenic	-14858	NM_001278269	23880	Mm.170905	NM_011815	ENSMUSG00000022148	Fyb	ADAP|B630013F22Rik|FYB-120/130|Fyb1|Slap130|p120/130|p120/p130	FYN binding protein	protein-coding
1316-3	chr15	92999600	93000914	+	635	Intergenic	Intergenic	274922	NM_001357006	223827	Mm.22819	NM_001033275	ENSMUSG00000036197	Gxylt1	Glt8d3|Gm1228|Gm87	glucoside xylosyltransferase 1	protein-coding
1264	chr1	168390885	168392147	+	635	intron (NM_001291508, intron 2 of 7)	intron (NM_001291508, intron 2 of 7)	40653	NM_001291509	18514	Mm.43358	NM_008783	ENSMUSG00000052534	Pbx1	2310056B04Rik|D230003C07Rik|Pbx-1	pre B cell leukemia homeobox 1	protein-coding
1332	chr10	78169215	78170545	+	635	promoter-TSS (NM_138601)	promoter-TSS (NM_138601)	-125	NM_001364646	28295	Mm.268691	NM_138601	ENSMUSG00000053329	Gatd3a	C21orf33|D10Jhu81e|ES1	glutamine amidotransferase like class 1 domain containing 3A	protein-coding
1113-2	chr11	120775608	120776719	+	634	Intergenic	Intergenic	8041	NM_009053	19719	Mm.871	NM_009053	ENSMUSG00000025158	Rfng	-	RFNG O-fucosylpeptide 3-beta-N-acetylglucosaminyltransferase	protein-coding
1266	chr11	74513947	74515211	+	634	intron (NM_001015046, intron 2 of 24)	B3|SINE|B2	8222	NM_001364131	380711	Mm.425690	NM_001015046	ENSMUSG00000038807	Rap1gap2	AU067654|Garnl4|Gm1561|mKIAA1039	RAP1 GTPase activating protein 2	protein-coding
1032	chr1	74296971	74298001	+	634	intron (NM_027154, intron 1 of 11)	intron (NM_027154, intron 1 of 11)	6850	NM_027154	69660	Mm.261182	NM_027154	ENSMUSG00000006301	Tmbim1	2310061B02Rik|AA960455|AU024746|C78899|RECS1|Tmbib1|mKIAA4161	transmembrane BAX inhibitor motif containing 1	protein-coding
1276-5	chr9	56993236	56994510	+	634	Intergenic	Intergenic	-1095	NM_019651	56294	Mm.325643	NM_019651	ENSMUSG00000032290	Ptpn9	MEG2	protein tyrosine phosphatase, non-receptor type 9	protein-coding
1362-2	chr9	73112726	73114086	+	634	promoter-TSS (NM_198609)	promoter-TSS (NM_198609)	-63	NM_198609	225215	Mm.379366	NM_198609	ENSMUSG00000032215	Rsl24d1	2410159K22Rik	ribosomal L24 domain containing 1	protein-coding
1108-4	chr2	150361871	150362977	+	634	intron (NM_027017, intron 1 of 3)	intron (NM_027017, intron 1 of 3)	341	NM_027017	69277	Mm.272470	NM_027017	ENSMUSG00000063364	3300002I08Rik	2900016H11Rik	RIKEN cDNA 3300002I08 gene	protein-coding
1054-8	chr18	53861304	53862356	+	634	promoter-TSS (NM_152809)	promoter-TSS (NM_152809)	-283	NM_152809	70425	Mm.368668	NM_152809	ENSMUSG00000073563	Csnk1g3	3300002K07Rik|C330049O21Rik	casein kinase 1, gamma 3	protein-coding
1091-10	chr9	13620882	13621971	+	634	exon (NM_001013813, exon 1 of 4)	exon (NM_001013813, exon 1 of 4)	1437	NM_001013813	270118	Mm.116898	NM_173776	ENSMUSG00000031925	Maml2	5930431H10|BC032967	mastermind like transcriptional coactivator 2	protein-coding
1138-2	chr11	20025440	20026576	+	634	Intergenic	Intergenic	86943	NM_001362899	66713	Mm.259045	NM_146243	ENSMUSG00000020152	Actr2	4921510D23Rik|AA409782|Arp2|D6Ertd746e	ARP2 actin-related protein 2	protein-coding
1179-2	chr19	44930554	44931731	+	634	promoter-TSS (NM_172638)	promoter-TSS (NM_172638)	23	NM_001081225	226151	Mm.212609	NM_172638	ENSMUSG00000036097	Slf2	3632432H19|Fam178a	SMC5-SMC6 complex localization factor 2	protein-coding
1255	chr11	120731413	120732666	+	634	promoter-TSS (NM_007621)	promoter-TSS (NM_007621)	-18	NM_007621	12409	Mm.21454	NM_007621	ENSMUSG00000025150	Cbr2	MLCR	carbonyl reductase 2	protein-coding
1175-5	chrX	4117467	4118640	+	633	Intergenic	Intergenic	-78523	NM_001085543	627264	Mm.457960	NM_001085543	ENSMUSG00000094307	Btbd35f28	Gm14347	BTB domain containing 35, family member 28	protein-coding
1331	chr17	27050413	27051742	+	633	Intergenic	Intergenic	-6227	NM_080553	16440	Mm.458106	NM_080553	ENSMUSG00000042644	Itpr3	IP3R 3|Ip3r3|Itpr-3|tf	inositol 1,4,5-triphosphate receptor 3	protein-coding
1029-4	chr14	65884549	65885576	+	633	Intergenic	ORR1D1|LTR|ERVL-MaLR	47760	NM_145944	67179	Mm.214576	NM_145944	ENSMUSG00000022035	Ccdc25	2610528H13Rik|NSrp70	coiled-coil domain containing 25	protein-coding
1046-6	chr2	172340907	172341951	+	633	Intergenic	ID_B1|SINE|B4	-4148	NM_025912	67017	Mm.30013	NM_025912	ENSMUSG00000027495	Fam210b	2010011I20Rik|AI430961|AV108736	family with sequence similarity 210, member B	protein-coding
1114-3	chr15	88938594	88939706	+	633	intron (NM_001357736, intron 1 of 11)	PB1D9|SINE|Alu	15268	NM_001357736	239591	Mm.86807	NM_172818	ENSMUSG00000022388	Ttll8	1700019P01Rik|4933401B17	tubulin tyrosine ligase-like family, member 8	protein-coding
888-6	chr3	136670713	136671599	+	633	intron (NM_001293622, intron 1 of 12)	CpG	1090	NM_001293622	19055	Mm.331389	NM_008913	ENSMUSG00000028161	Ppp3ca	2900074D19Rik|CN|Caln|Calna|CnA	protein phosphatase 3, catalytic subunit, alpha isoform	protein-coding
1276-3	chr19	5823403	5824677	+	633	TTS (NR_131212)	TTS (NR_131212)	-21368	NR_002847	72289	Mm.298256	NR_002847	ENSMUSG00000092341	Malat1	2210401K01Rik|9430072K23Rik|AI647968|Neat2	metastasis associated lung adenocarcinoma transcript 1 (non-coding RNA)	ncRNA
1205-4	chr3	154816278	154817481	+	633	intron (NM_177066, intron 23 of 24)	intron (NM_177066, intron 23 of 24)	105746	NM_175176	209601	Mm.331454	NM_175176	ENSMUSG00000078161	Erich3	1700013E18Rik|4922501L14Rik|5031409G23Rik|AI596448|Gm133	glutamate rich 3	protein-coding
1153-4	chr6	30705046	30706197	+	633	Intergenic	Intergenic	-11872	NR_130775	83922	Mm.65389	NM_031998	ENSMUSG00000029790	Cep41	1700017E11Rik|2810431D15Rik|Tsga14	centrosomal protein 41	protein-coding
861-4	chr3	142871817	142872676	+	633	intron (NM_178654, intron 1 of 21)	B1F1|SINE|Alu	9758	NM_178654	109333	Mm.244236	NM_178654	ENSMUSG00000004591	Pkn2	6030436C20Rik|AI507382|PRK2|Prkcl2|Stk7	protein kinase N2	protein-coding
891-2	chr6	124808178	124809067	+	633	promoter-TSS (NM_013539)	promoter-TSS (NM_013539)	-39	NM_001306051	14794	Mm.261906	NM_013539	ENSMUSG00000038451	Spsb2	AI461677|C9|Grcc9|SSB2	splA/ryanodine receptor domain and SOCS box containing 2	protein-coding
1169-6	chr18	34858943	34860110	+	633	Intergenic	Intergenic	-1681	NM_007913	13653	Mm.181959	NM_007913	ENSMUSG00000038418	Egr1	A530045N19Rik|ETR103|Egr-1|Krox-1|Krox-24|Krox24|NGF1-A|NGFI-A|NGFIA|TIS8|Zenk|Zfp-6|Zif268|egr	early growth response 1	protein-coding
1183-8	chr3	96134624	96135805	+	633	intron (NM_001025613, intron 2 of 12)	intron (NM_001025613, intron 2 of 12)	-26756	NM_181409	194126	Mm.268536	NM_181409	ENSMUSG00000045934	Mtmr11	AI035306|BC051083|Cra	myotubularin related protein 11	protein-coding
1115-8	chr6	88849196	88850309	+	633	exon (NM_001347327, exon 3 of 8)	exon (NM_001347327, exon 3 of 8)	6898	NR_045880	100038356	Mm.442704	NR_045880	ENSMUSG00000085828	Gm15612	-	predicted gene 15612	ncRNA
1191-4	chr9	121314232	121315421	+	632	intron (NM_001357972, intron 1 of 13)	intron (NM_001357972, intron 1 of 13)	17324	NR_152160	67095	Mm.491112	NM_175114	ENSMUSG00000032536	Trak1	2310001H13Rik|AI413908|AI467545|hyrt|mKIAA1042	trafficking protein, kinesin binding 1	protein-coding
1283	chr11	54002441	54003722	+	632	intron (NM_019687, intron 3 of 9)	intron (NM_019687, intron 3 of 9)	-22748	NM_019723	56517	Mm.154284	NM_019723	ENSMUSG00000063652	Slc22a21	Octn3|Slc22a9	solute carrier family 22 (organic cation transporter), member 21	protein-coding
1901	chr14	19911594	19913493	+	632	intron (NM_001285910, intron 1 of 2)	intron (NM_001285910, intron 1 of 2)	64150	NM_001285911	14702	Mm.41737	NM_010315	ENSMUSG00000043004	Gng2	-	guanine nucleotide binding protein (G protein), gamma 2	protein-coding
949-5	chr5	123141002	123141949	+	632	promoter-TSS (NM_001040398)	promoter-TSS (NM_001040398)	-718	NM_001040398	208043	Mm.250391	NM_177581	ENSMUSG00000038384	Setd1b	AA516740|BC035291|KMT2G|mKIAA1076	SET domain containing 1B	protein-coding
1262-3	chr4	151005452	151006712	+	632	intron (NM_011067, intron 20 of 20)	MTD|LTR|ERVL-MaLR	8985	NM_011910	24111	Mm.89984	NM_011910	ENSMUSG00000028963	Uts2	UII|Ucn2|prepro-UII	urotensin 2	protein-coding
881-2	chr4	46448913	46449792	+	632	Intergenic	Intergenic	-1574	NM_130889	67628	Mm.263913	NM_130889	ENSMUSG00000028333	Anp32b	2410015B15Rik|PAL31|PHAPI2a|Ssp29	acidic (leucine-rich) nuclear phosphoprotein 32 family, member B	protein-coding
1013	chr14	31217171	31218182	+	632	promoter-TSS (NM_001025379)	promoter-TSS (NM_001025379)	-197	NM_001025379	218877	Mm.27812	NM_001025379	ENSMUSG00000021904	Sema3g	AK129018	sema domain, immunoglobulin domain (Ig), short basic domain, secreted, (semaphorin) 3G	protein-coding
2290	chr15	100764168	100766456	+	632	intron (NM_021530, intron 1 of 24)	intron (NM_021530, intron 1 of 24)	3565	NM_021530	59033	Mm.209856	NM_021530	ENSMUSG00000023032	Slc4a8	AW493845|C230026C11|NDCBE|kNBC-3	solute carrier family 4 (anion exchanger), member 8	protein-coding
1098-2	chr10	80291864	80292960	+	632	promoter-TSS (NM_009091)	promoter-TSS (NM_009091)	-19	NM_009091	20054	Mm.643	NM_009091	ENSMUSG00000063457	Rps15	rig	ribosomal protein S15	protein-coding
1319-3	chr6	113780935	113782252	+	632	intron (NM_001036684, intron 9 of 19)	(TG)n|Simple_repeat|Simple_repeat	-40912	NM_024206	110379	Mm.29296	NM_024206	ENSMUSG00000030298	Sec13	1110003H02Rik|Sec13l1|Sec13r	SEC13 homolog, nuclear pore and COPII coat complex component	protein-coding
1157-5	chr19	4168835	4169990	+	632	intron (NM_134148, intron 9 of 9)	CpG	-6029	NR_153659	58988	Mm.271937	NM_021485	ENSMUSG00000024830	Rps6kb2	S6K-beta-2|S6K2	ribosomal protein S6 kinase, polypeptide 2	protein-coding
1198-3	chr12	35337919	35339115	+	632	Intergenic	Intergenic	-143620	NR_030449	751520		NR_030449	ENSMUSG00000076253	Mir680-3	Mirn680-3	microRNA 680-3	ncRNA
1425	chr1	150034414	150035837	+	632	Intergenic	RMER4B|LTR|ERVK	64749	NR_015466	320019	Mm.353072	NR_015466	ENSMUSG00000097028	Ptgs2os	7530420F21Rik	prostaglandin-endoperoxide synthase 2, opposite strand	ncRNA
1122-6	chr7	142295830	142296950	+	632	TTS (NM_015808)	TTS (NM_015808)	744	NM_015808	50774		NM_015808	ENSMUSG00000066100	Krtap5-1	-	keratin associated protein 5-1	protein-coding
1053-10	chrX	160296388	160297439	+	631	Intergenic	L1_Mus3|LINE|L1	-93777	NM_001079847	237175	Mm.213016	NM_178712	ENSMUSG00000031298	Adgrg2	AW212196|B830041D06Rik|Gpr64|Me6	adhesion G protein-coupled receptor G2	protein-coding
942-3	chr19	47400379	47401319	+	631	intron (NM_001164717, intron 2 of 13)	intron (NM_001164717, intron 2 of 13)	63562	NM_001164717	14218	Mm.127560	NM_008018	ENSMUSG00000053617	Sh3pxd2a	2310014D11Rik|AA589508|AI256723|AI413738|C230050L11|EG329070|Fish|Gm5098|Sh3md1|TSK5|Tks5	SH3 and PX domains 2A	protein-coding
940	chr1	4257923	4258861	+	631	intron (NM_001370921, intron 8 of 22)	(TCTCTG)n|Simple_repeat|Simple_repeat	101911	NM_001370921	19888	Mm.294263	NM_011283	ENSMUSG00000025900	Rp1	Dcdc3|Gm38717|Orp1|Rp1h|mG145	retinitis pigmentosa 1 (human)	protein-coding
952	chr17	34937574	34938524	+	631	TTS (NM_010893)	TTS (NM_010893)	6796	NM_010893	18010	Mm.8856	NM_010893	ENSMUSG00000007038	Neu1	AA407268|AA407316|Aglp|Apl|Bat-7|Bat7|G9|Map-2|Neu|Neu-1	neuraminidase 1	protein-coding
1290	chr10	9762773	9764061	+	631	intron (NM_001081344, intron 24 of 25)	intron (NM_001081344, intron 24 of 25)	78695	NR_038036	620417	Mm.378085	NR_038036	ENSMUSG00000111901	Gm6150	-	predicted gene 6150	ncRNA
1124-6	chr8	71279456	71280578	+	631	intron (NM_015742, intron 1 of 39)	intron (NM_015742, intron 1 of 39)	7303	NM_015742	17925	Mm.33779	NM_015742	ENSMUSG00000004677	Myo9b	-	myosin IXb	protein-coding
1176-5	chr9	37508364	37509538	+	631	intron (NM_146222, intron 1 of 3)	intron (NM_146222, intron 1 of 3)	-19138	NR_136939	69524	Mm.41751	NM_027102	ENSMUSG00000001946	Esam	2310008D05Rik|Esam1|W117m	endothelial cell-specific adhesion molecule	protein-coding
933-2	chr18	36238795	36239726	+	631	Intergenic	MERVL_2A-int|LTR|ERVL	-41845	NM_008989	19290	Mm.44643	NM_008989	ENSMUSG00000043991	Pura	6330411E07Rik|CAGER-1|Pur-alpha|ssCRE-BP	purine rich element binding protein A	protein-coding
1437-2	chr15	100410771	100412206	+	631	intron (NM_001356952, intron 2 of 15)	intron (NM_001356952, intron 2 of 15)	11567	NM_001146161	18174	Mm.234608	NM_008732	ENSMUSG00000023030	Slc11a2	DCT1|DMT1|Nramp2|mk|van	solute carrier family 11 (proton-coupled divalent metal ion transporters), member 2	protein-coding
1127-7	chr9	108844882	108846007	+	631	intron (NM_080437, intron 28 of 34)	intron (NM_080437, intron 28 of 34)	-8599	NM_134420	171429	Mm.45201	NM_134420	ENSMUSG00000023259	Slc26a6	B930010B04Rik|CFEX|Pat-1|Pat1	solute carrier family 26, member 6	protein-coding
2092	chr19	47887015	47889105	+	631	Intergenic	Intergenic	22266	NM_026619	68214	Mm.63791	NM_026619	ENSMUSG00000025069	Gsto2	1700020F09Rik|4930425C18Rik|GSTO 2-2	glutathione S-transferase omega 2	protein-coding
1358	chr10	83263699	83265055	+	630	intron (NM_177388, intron 8 of 10)	RLTR12C|LTR|ERVK	73440	NM_177388	338365	Mm.67073	NM_177388	ENSMUSG00000034591	Slc41a2	A230035L05Rik|SLC41A1-L1	solute carrier family 41, member 2	protein-coding
1245-6	chr7	31186551	31187794	+	630	Intergenic	RLTR30D2_MM|LTR|ERV1	24814	NR_046062	100038516	Mm.387223	NR_046062	ENSMUSG00000100985	Gm10640	EG668322	predicted gene 10640	ncRNA
1174-6	chr4	13391150	13392322	+	630	Intergenic	Intergenic	-351566	NM_001111026	12395	Mm.4909	NM_009822	ENSMUSG00000006586	Runx1t1	Cbfa2t1h|ETO|MTG8	RUNX1 translocation partner 1	protein-coding
1037	chr13	37880102	37881137	+	630	intron (NM_001039188, intron 1 of 9)	intron (NM_001039188, intron 1 of 9)	-7815	NR_033218	68750	Mm.491109	NM_026830	ENSMUSG00000039087	Rreb1	1110037N09Rik|AA414966|B930013M22Rik	ras responsive element binding protein 1	protein-coding
1120-7	chr4	110012800	110013918	+	630	Intergenic	L1_Mus1|LINE|L1	35334	NM_172296	242620	Mm.32825	NM_172296	ENSMUSG00000047143	Dmrta2	Dmrt5	doublesex and mab-3 related transcription factor like family A2	protein-coding
870	chr11	17466311	17467179	+	630	Intergenic	(CCA)n|Simple_repeat|Simple_repeat	209057	NM_001330649	57316	Mm.287982	NM_020558	ENSMUSG00000000581	C1d	1110036E10Rik|AI875855|SUN-CoR	C1D nuclear receptor co-repressor	protein-coding
1327	chr1	85275965	85277290	+	630	Intergenic	RSINE1|SINE|B4	-6061	NM_001037909	620078	Mm.386456	NM_175219	ENSMUSG00000052477	C130026I21Rik	4930565N07Rik	RIKEN cDNA C130026I21 gene	protein-coding
1156-2	chr10	75555128	75556282	+	630	intron (NM_198860, intron 3 of 3)	intron (NM_198860, intron 3 of 3)	4625	NM_198860	192734	Mm.259320	NM_198860	ENSMUSG00000046807	Lrrc75b	AI646023|Fam211b	leucine rich repeat containing 75B	protein-coding
1289-3	chr9	76527169	76528456	+	629	intron (NM_001045518, intron 2 of 4)	ID_B1|SINE|B4	39303	NM_001045518	208994	Mm.256929	NM_001045518	ENSMUSG00000032358	Fam83b	C530008M07Rik|Gm516	family with sequence similarity 83, member B	protein-coding
1200-5	chr17	46762897	46764095	+	629	intron (NM_011195, intron 1 of 3)	intron (NM_011195, intron 1 of 3)	216	NM_011195	19208	Mm.215173	NM_011195	ENSMUSG00000036858	Ptcra	gp33|pT-alpha|pT-alpha-TCR|pT[a]|pTa|pTalpha	pre T cell antigen receptor alpha	protein-coding
1240-3	chr15	95827148	95828386	+	629	intron (NR_155276, intron 1 of 1)	MLT1B|LTR|ERVL-MaLR	2305	NR_155277	102634389	Mm.440563	NR_155276	ENSMUSG00000078648	LOC102634389	-	uncharacterized LOC102634389	ncRNA
1345	chr13	92515404	92516747	+	629	intron (NM_173392, intron 5 of 17)	LTR33A_|LTR|ERVL	14735	NM_173392	218441	Mm.259585	NM_173392	ENSMUSG00000021706	Zfyve16	AI035632|B130024H06Rik|B130031L15|mKIAA0305	zinc finger, FYVE domain containing 16	protein-coding
1144-2	chr19	53023152	53024294	+	629	intron (NM_133216, intron 3 of 20)	intron (NM_133216, intron 3 of 20)	-12967	NR_105834	102465220		NR_105834	ENSMUSG00000098730	Mir6407	Gm27832|mmu-mir-6407	microRNA 6407	ncRNA
1251-2	chr15	89122843	89124092	+	629	promoter-TSS (NM_001163319)	promoter-TSS (NM_001163319)	-317	NM_001163319	328580	Mm.380934	NM_001163319	ENSMUSG00000051786	Tubgcp6	AI843275|D430023H11|GCP-6|mKIAA1669	tubulin, gamma complex associated protein 6	protein-coding
1127-3	chr16	7026757	7027882	+	629	intron (NM_001359725, intron 5 of 16)	intron (NM_001359725, intron 5 of 16)	-12051	NM_001359729	268859	Mm.370334	NM_021477	ENSMUSG00000008658	Rbfox1	A2bp|A2bp1|Hrnbp1|fox-1	RNA binding protein, fox-1 homolog (C. elegans) 1	protein-coding
877-2	chr7	61885280	61886155	+	628	intron (NR_015533, intron 6 of 8)	RMER13B|LTR|ERVK	-7853	NR_029772	723931		NR_029772	ENSMUSG00000065568	Mir344	Mirn344|mir-344-1|mmu-mir-344	microRNA 344	ncRNA
1460-2	chr5	120559769	120561227	+	628	intron (NM_145853, intron 2 of 27)	ORR1B1|LTR|ERVL-MaLR	28115	NM_145853	252972	Mm.114054	NM_145853	ENSMUSG00000032741	Tpcn1	5730403B01Rik|Tpc1|mKIAA1169	two pore channel 1	protein-coding
876-3	chr9	106476193	106477067	+	628	promoter-TSS (NM_145620)	promoter-TSS (NM_145620)	319	NM_001311150	235587	Mm.273659	NM_145619	ENSMUSG00000023249	Parp3	A930002C11Rik|ADPRT-3|ARTD3|AW990611|Adprt3|Adprtl3|PARP-3|pADPRT-3	poly (ADP-ribose) polymerase family, member 3	protein-coding
1252-4	chr2	25400380	25401630	+	628	3' UTR (NM_009849, exon 9 of 9)	3' UTR (NM_009849, exon 9 of 9)	-2045	NM_008721	18146	Mm.1131	NM_008721	ENSMUSG00000015094	Npdc1	AI314472|NPDC-1	neural proliferation, differentiation and control 1	protein-coding
1143-4	chr4	46040184	46041325	+	628	intron (NM_021883, intron 1 of 9)	intron (NM_021883, intron 1 of 9)	1532	NM_021883	21916	Mm.249594	NM_021883	ENSMUSG00000028328	Tmod1	E-Tmod|Tmod	tropomodulin 1	protein-coding
1218-6	chr2	92608674	92609890	+	628	intron (NM_001356552, intron 2 of 3)	intron (NM_001356552, intron 2 of 3)	8165	NM_001356553	76969	Mm.38021	NM_023850	ENSMUSG00000027221	Chst1	2610008E20Rik|AW125896|C6ST|GST-1|Gst1|KS6ST|KSGAL6ST|KSST	carbohydrate sulfotransferase 1	protein-coding
1243-3	chr2	30719562	30720803	+	628	Intergenic	Intergenic	-1028	NR_037272	100526499		NR_037272	ENSMUSG00000093091	Mir3089	mir-3089|mmu-mir-3089	microRNA 3089	ncRNA
1206-3	chr17	34120968	34122172	+	628	5' UTR (NM_010238, exon 1 of 13)	5' UTR (NM_010238, exon 1 of 13)	177	NM_010238	14312	Mm.3444	NM_010238	ENSMUSG00000024335	Brd2	AW228947|D17H6S113E|Frg-1|Fsrg-1|Fsrg1|Nat|Ring3|Rnf3|mKIAA4005	bromodomain containing 2	protein-coding
1076-3	chr17	67273424	67274498	+	628	intron (NM_008984, intron 1 of 30)	B3|SINE|B2	80498	NM_008984	19274	Mm.311809	NM_008984	ENSMUSG00000033278	Ptprm	RPTPmu|mKIAA4044	protein tyrosine phosphatase, receptor type, M	protein-coding
1241-4	chr11	119533061	119534300	+	627	Intergenic	PB1D7|SINE|Alu	14140	NM_008730	18164	Mm.5142	NM_008730	ENSMUSG00000025582	Nptx1	D11Bwg1004e|Np1	neuronal pentraxin 1	protein-coding
1486	chr18	32016661	32018145	+	627	intron (NM_032394, intron 2 of 46)	intron (NM_032394, intron 2 of 46)	19528	NM_032394	17922	Mm.440013	NM_032394	ENSMUSG00000024388	Myo7b	-	myosin VIIB	protein-coding
953-3	chr5	35964875	35965826	+	627	intron (NM_027373, intron 8 of 16)	intron (NM_027373, intron 8 of 16)	72031	NM_027373	70292	Mm.125167	NM_027373	ENSMUSG00000029094	Afap1	2600003E23Rik|9630044L16Rik|AI848729|Afap|mKIAA3018	actin filament associated protein 1	protein-coding
946	chr15	100615772	100616716	+	627	intron (NM_011873, intron 1 of 3)	CpG	582	NM_011873	23994	Mm.486175	NM_011873	ENSMUSG00000000346	Dazap2	AI314727|Brbp|Gcap28|Prtb|gt6-12|mKIAA0058	DAZ associated protein 2	protein-coding
1291-3	chr17	72961328	72962617	+	627	Intergenic	Intergenic	43667	NM_029999	77889	Mm.154109	NM_029999	ENSMUSG00000024063	Lbh	1810009F10Rik|6720416L16Rik	limb-bud and heart	protein-coding
1564	chr15	89178463	89180025	+	627	intron (NM_138749, intron 1 of 37)	intron (NM_138749, intron 1 of 37)	1544	NM_001284506	140570	Mm.267514	NM_138749	ENSMUSG00000036606	Plxnb2	Debt|plexin-B2	plexin B2	protein-coding
1360-2	chr10	100356489	100357847	+	627	intron (NM_001166634, intron 1 of 1).2	intron (NM_001166634, intron 1 of 1).2	-4170	NM_001166638	100043231	Mm.475613	NM_001166638	ENSMUSG00000112931	Gm4303	-	predicted gene 4303	protein-coding
982-2	chr7	100653558	100654538	+	627	intron (NM_001163183, intron 4 of 7)	intron (NM_001163183, intron 4 of 7)	2917	NM_001163187	27276	Mm.491216	NM_013746	ENSMUSG00000030701	Plekhb1	AI315628|PHR1|Phret1|evt-1	pleckstrin homology domain containing, family B (evectins) member 1	protein-coding
1409-2	chr15	79842112	79843519	+	627	Intergenic	Lx9|LINE|L1	-8482	NM_001013362	504193	Mm.38438	NM_029079	ENSMUSG00000089837	Npcd	Cbx6-Nptxr	neuronal pentraxin chromo domain	protein-coding
1028-4	chr7	19715340	19716366	+	626	promoter-TSS (NM_016871)	promoter-TSS (NM_016871)	-424	NM_016871	53333	Mm.61682	NM_016871	ENSMUSG00000002984	Tomm40	AW539759|Mom35|Tom40	translocase of outer mitochondrial membrane 40	protein-coding
1133	chr10	61371156	61372287	+	626	intron (NM_013753, intron 1 of 19)	intron (NM_013753, intron 1 of 19)	11802	NM_013753	27355	Mm.269699	NM_013753	ENSMUSG00000020092	Pald1	MMPAL|Pald|mKIAA1274	phosphatase domain containing, paladin 1	protein-coding
1196-5	chrX	102711732	102712926	+	626	exon (NM_001039116, exon 4 of 7)	exon (NM_001039116, exon 4 of 7)	1152	NM_001310614	632708	Mm.297715	NM_001039116	ENSMUSG00000073027	Dmrtc1b	Dmrt8.2|Gm714	DMRT-like family C1b	protein-coding
1284-2	chr8	118091214	118092496	+	626	Intergenic	Intergenic	-191756	NM_019707	12554	Mm.334841	NM_019707	ENSMUSG00000031841	Cdh13	4932416G01Rik|Cdht|Tcad	cadherin 13	protein-coding
931-7	chr8	24205178	24206107	+	626	Intergenic	Intergenic	233304	NM_026931	69068	Mm.25775	NM_026931	ENSMUSG00000056313	Tcim	1110065B09Rik|1810011O10Rik|AW121743|AW321058	transcriptional and immune response regulator	protein-coding
1108	chr10	80828629	80829735	+	626	TTS (NR_027656)	TTS (NR_027656)	385	NR_035503	100316778		NR_035503	ENSMUSG00000087993	Mir1982	mir-1982|mmu-mir-1982	microRNA 1982	ncRNA
1271-2	chr12	108348849	108350118	+	625	intron (NM_010010, intron 5 of 14)	(CAG)n|Simple_repeat|Simple_repeat	15167	NM_010010	13116	Mm.41911	NM_010010	ENSMUSG00000021259	Cyp46a1	CH24H|Cyp46	cytochrome P450, family 46, subfamily a, polypeptide 1	protein-coding
1096-3	chr17	29144887	29145981	+	625	intron (NM_001364848, intron 11 of 13)	intron (NM_001364848, intron 11 of 13)	31253	NM_001364848	442827	Mm.20023	NM_001002786	ENSMUSG00000064147	Rab44	9830134C10Rik	RAB44, member RAS oncogene family	protein-coding
966-5	chr5	25018405	25019369	+	625	intron (NM_145401, intron 3 of 15)	intron (NM_145401, intron 3 of 15)	-23134	NM_001310480	108099	Mm.33649	NM_145401	ENSMUSG00000028944	Prkag2	2410051C13Rik|AAKG|AAKG2|AI854673|H91620p|WPWS	protein kinase, AMP-activated, gamma 2 non-catalytic subunit	protein-coding
1173	chr13	69522223	69523394	+	624	intron (NM_001169131, intron 1 of 12)	intron (NM_001169131, intron 1 of 12)	11056	NM_198600	210106	Mm.315959	NM_198600	ENSMUSG00000034575	Tent4a	LAK-1|POLK|Papd7|Pols|TRF4|TRF4-1	terminal nucleotidyltransferase 4A	protein-coding
979-5	chr3	88659435	88660412	+	624	Intergenic	RLTR26_Mus|LTR|ERVK	-6781	NM_181817	242093	Mm.269130	NM_181817	ENSMUSG00000049741	Rxfp4	GPCR142|Gpr100|Rln3r2|SALPR	relaxin family peptide receptor 4	protein-coding
1006-7	chr5	138116368	138117372	+	624	promoter-TSS (NM_011757)	promoter-TSS (NM_011757)	-35	NM_001044703	22697	Mm.2760	NM_011757	ENSMUSG00000037017	Zscan21	AI326272|CTfin51|RU49|Zfp-38|Zfp38|Zipro1	zinc finger and SCAN domain containing 21	protein-coding
1009-7	chr4	132639086	132640093	+	624	intron (NM_211357, intron 1 of 14)	intron (NM_211357, intron 1 of 14)	543	NM_010166	14050	Mm.227733	NM_010166	ENSMUSG00000028886	Eya3	AI844637	EYA transcriptional coactivator and phosphatase 3	protein-coding
1234-3	chr8	123607910	123609142	+	624	Intergenic	Intergenic	-42439	NR_046147	100861494		NR_046147	ENSMUSG00000095376	Gm22109	Rn5s23	predicted gene, 22109	rRNA
1128-3	chr11	86937615	86938741	+	624	3' UTR (NM_001005341, exon 5 of 5)	3' UTR (NM_001005341, exon 5 of 5)	55584	NM_001005341	77864	Mm.191894	NM_001005341	ENSMUSG00000018427	Ypel2	6430570G24|E130113K08Rik	yippee like 2	protein-coding
1135-2	chr10	94168524	94169657	+	624	intron (NM_011629, intron 7 of 13)	B4A|SINE|B4	21159	NM_011629	22025	Mm.107483	NM_011629	ENSMUSG00000005897	Nr2c1	4831444H07Rik|80.3|Eenr|TR2|Tr2-11	nuclear receptor subfamily 2, group C, member 1	protein-coding
1221	chr1	189633324	189634543	+	624	Intergenic	Intergenic	54153	NM_001081363	108000	Mm.129746	NM_001081363	ENSMUSG00000026605	Cenpf	6530404A22Rik|AI325968|CENF|Lek1|PRO1779|mitosin	centromere protein F	protein-coding
1094-4	chr5	69561810	69562902	+	624	intron (NM_001310631, intron 8 of 14)	intron (NM_001310631, intron 8 of 14)	5432	NM_001310631	231279	Mm.21105	NM_172711	ENSMUSG00000029208	Guf1	4631409J12|AA407526|EF-4	GUF1 homolog, GTPase	protein-coding
1199-2	chr12	84995722	84996919	+	624	promoter-TSS (NM_001347421)	promoter-TSS (NM_001347421)	-1	NM_001347421	56531	Mm.153183	NM_178363	ENSMUSG00000021244	Ylpm1	A930013E17Rik|ZAP|Zap3	YLP motif containing 1	protein-coding
1107-10	chr5	24030184	24031289	+	623	promoter-TSS (NM_001310471)	promoter-TSS (NM_001310471)	-46	NM_053090	84652	Mm.304976	NM_053090	ENSMUSG00000028995	Fam126a	AB030242|Drctnnb1a	family with sequence similarity 126, member A	protein-coding
1137-5	chr5	81779274	81780409	+	623	intron (NM_001359830, intron 25 of 25)	intron (NM_001359830, intron 25 of 25)	344872	NR_138557	67327	Mm.87058	NR_138557		1700031L13Rik	-	RIKEN cDNA 1700031L13 gene	ncRNA
1025-5	chr18	32246938	32247961	+	623	intron (NM_133658, intron 7 of 14)	(CAGA)n|Simple_repeat|Simple_repeat	7122	NM_133658	13872	Mm.282335	NM_133658	ENSMUSG00000024382	Ercc3	BTF2 p89|Ercc-3|XPB	excision repair cross-complementing rodent repair deficiency, complementation group 3	protein-coding
1261	chr10	39780819	39782078	+	623	intron (NM_011264, intron 1 of 31)	intron (NM_011264, intron 1 of 31)	49288	NM_011264	19714	Mm.439723	NM_011264	ENSMUSG00000019841	Rev3l	Rev|Rev3|Sez4	REV3 like, DNA directed polymerase zeta catalytic subunit	protein-coding
1389-4	chr15	76625568	76626955	+	623	promoter-TSS (NM_001305668)	promoter-TSS (NM_001305668)	-177	NM_001305668	66914	Mm.30028	NM_025842	ENSMUSG00000115987	Vps28	1110014J03Rik|CIIA|D730005C08Rik	vacuolar protein sorting 28	protein-coding
1434-3	chr3	85952154	85953586	+	623	Intergenic	MLT1H|LTR|ERVL-MaLR	49661	NM_001001650	368202	Mm.253822	NM_001001650	ENSMUSG00000049013	Prss48	Esspl|Gm1019	protease, serine 48	protein-coding
1200-4	chr16	94959224	94960422	+	623	intron (NM_001025585, intron 1 of 2)	intron (NM_001025585, intron 1 of 2)	37873	NM_001025584	16522	Mm.328720	NM_010606	ENSMUSG00000043301	Kcnj6	BIR1|GIRK2|KATP2|KCNJ7|Kir3.2|weaver|wv	potassium inwardly-rectifying channel, subfamily J, member 6	protein-coding
1210-6	chr18	60715177	60716385	+	623	intron (NM_001348146, intron 1 of 6)	intron (NM_001348146, intron 1 of 6)	11785	NM_001348103	15531	Mm.181862	NM_008306	ENSMUSG00000054008	Ndst1	1200015G06Rik|HSNST|HSNST 1|Hsst|N-HSST|N-HSST 1|NDST-1|b2b2230Clo	N-deacetylase/N-sulfotransferase (heparan glucosaminyl) 1	protein-coding
1188	chr11	32345128	32346314	+	623	Intergenic	L1MB3|LINE|L1	-2119	NM_177364	268396	Mm.227616	NM_177364	ENSMUSG00000040711	Sh3pxd2b	G431001E03Rik|TSK4|fad49	SH3 and PX domains 2B	protein-coding
1403-2	chr2	117667674	117669075	+	623	Intergenic	Intergenic	144428	NR_126427	100504728	Mm.413174	NR_126427		Gm13985	-	predicted gene 13985	ncRNA
1198-4	chr15	88750248	88751444	+	623	promoter-TSS (NM_181412)	promoter-TSS (NM_181412)	-865	NM_181412	223773	Mm.396622	NM_181412	ENSMUSG00000034333	Zbed4	1700009F06Rik	zinc finger, BED type containing 4	protein-coding
1031-5	chr6	117879090	117880119	+	623	Intergenic	CpG	16723	NM_001001792	22685	Mm.249661	NM_008616	ENSMUSG00000042097	Zfp239	Mok-2|Mok2|Znf239	zinc finger protein 239	protein-coding
1205-5	chr7	79314775	79315978	+	623	intron (NM_018811, intron 3 of 10)	MamRep137|DNA|TcMar-Tigger	42110	NM_018811	54608	Mm.365490	NM_018811	ENSMUSG00000039202	Abhd2	2210009N18Rik|LABH2|Labh-2	abhydrolase domain containing 2	protein-coding
1156-3	chr11	94213844	94214998	+	623	exon (NM_009427, exon 2 of 2)	exon (NM_009427, exon 2 of 2)	2967	NM_009427	22057	Mm.259673	NM_009427	ENSMUSG00000037573	Tob1	Tob|Trob	transducer of ErbB-2.1	protein-coding
900-6	chr4	119420813	119421711	+	622	intron (NM_001355214, intron 2 of 2)	L2c|LINE|L2	1158	NM_001355214	106564	Mm.27245	NM_026494	ENSMUSG00000028636	Ppcs	6330579B17Rik|AI413471|AI790434	phosphopantothenoylcysteine synthetase	protein-coding
1064-2	chr17	31658541	31659603	+	622	promoter-TSS (NM_001163769)	promoter-TSS (NM_001163769)	-308	NM_001357907	108121	Mm.379289	NM_024187	ENSMUSG00000061613	U2af1	2010107D16Rik	U2 small nuclear ribonucleoprotein auxiliary factor (U2AF) 1	protein-coding
1194-5	chr8	13621135	13622327	+	621	intron (NM_009025, intron 2 of 23)	intron (NM_009025, intron 2 of 23)	55856	NM_009025	19414	Mm.18517	NM_009025	ENSMUSG00000031453	Rasa3	AI326412|C86362|E130011G04|GAPIII|hlb381|scat	RAS p21 protein activator 3	protein-coding
1193-10	chr8	35469067	35470258	+	621	intron (NM_026067, intron 6 of 6)	B1_Mur2|SINE|Alu	25871	NM_026067	67276	Mm.207534	NM_026067	ENSMUSG00000031527	Eri1	3'hexo|3110010F15Rik|Thex1|eri-1	exoribonuclease 1	protein-coding
1187-3	chr11	97006726	97007911	+	621	Intergenic	L2a|LINE|L2	-6251	NM_031183	83395	Mm.156282	NM_031183	ENSMUSG00000038560	Sp6	1110025J03Rik|AA591031|AI592962|Epfn|Klf14	trans-acting transcription factor 6	protein-coding
1102-4	chr8	83332344	83333444	+	621	promoter-TSS (NM_001170691)	promoter-TSS (NM_001170691)	-408	NM_001170691	244548	Mm.38762	NM_178736	ENSMUSG00000035151	Elmod2	9830169G11Rik	ELMO/CED-12 domain containing 2	protein-coding
1058-7	chr9	20977485	20978541	+	621	Intergenic	Intergenic	-1220	NM_010333	14739	Mm.46493	NM_010333	ENSMUSG00000043895	S1pr2	1100001A16Rik|Edg5|Gpcr13|H218|LPb2|S1P2	sphingosine-1-phosphate receptor 2	protein-coding
1012	chr12	112796301	112797311	+	620	Intergenic	Intergenic	-12169	NM_145450	217887	Mm.186678	NM_145450	ENSMUSG00000037594	Clba1	AW050009|C130001I08Rik|Flj20080	clathrin binding box of aftiphilin containing 1	protein-coding
861	chr10	61491780	61492639	+	620	intron (NM_153542, intron 2 of 4)	intron (NM_153542, intron 2 of 4)	16376	NM_153542	216011	Mm.136116	NM_153542	ENSMUSG00000037151	Lrrc20	BC036304	leucine rich repeat containing 20	protein-coding
1280-3	chr15	99867812	99869090	+	620	intron (NM_001113545, intron 1 of 10)	intron (NM_001113545, intron 1 of 10)	7005	NM_001113545	65970	Mm.33207	NM_023063	ENSMUSG00000023022	Lima1	Eplin	LIM domain and actin binding 1	protein-coding
978-6	chr15	8568445	8569421	+	620	Intergenic	CpG	-124470	NM_201232	71175	Mm.240329	NM_027707	ENSMUSG00000022141	Nipbl	Idn3	NIPBL cohesin loading factor	protein-coding
1274-3	chr7	19831515	19832787	+	620	Intergenic	Intergenic	-9396	NM_033601	12051	Mm.439658	NM_033601	ENSMUSG00000053175	Bcl3	AI528691|Bcl-3	B cell leukemia/lymphoma 3	protein-coding
1045-7	chr7	80973766	80974809	+	619	Intergenic	MTE2a|LTR|ERVL-MaLR	-19397	NM_178707	233410	Mm.29525	NM_178707	ENSMUSG00000005621	Zfp592	A730014M16Rik|Znf592	zinc finger protein 592	protein-coding
1117-2	chr1	90439513	90440628	+	619	Intergenic	Intergenic	-163355	NM_133805	108679	Mm.119177	NM_133805	ENSMUSG00000034432	Cops8	9430009J09Rik|AA408242|Csn8|Sgn8	COP9 signalosome subunit 8	protein-coding
1232-3	chr2	122106036	122107266	+	619	intron (NM_145531, intron 6 of 39)	intron (NM_145531, intron 6 of 39)	11735	NM_145531	214585	Mm.222303	NM_145531	ENSMUSG00000033396	Spg11	6030465E24Rik|A330015I11|C530005A01Rik	SPG11, spatacsin vesicle trafficking associated	protein-coding
1230-2	chr10	61085180	61086408	+	619	Intergenic	Intergenic	-3537	NM_025273	13180	Mm.39473	NM_025273	ENSMUSG00000020098	Pcbd1	Dcoh|Pcbd|Pcd|Phs	pterin 4 alpha carbinolamine dehydratase/dimerization cofactor of hepatocyte nuclear factor 1 alpha (TCF1) 1	protein-coding
1266-3	chr15	77815556	77816820	+	619	intron (NM_022410, intron 1 of 40)	intron (NM_022410, intron 1 of 40)	25987	NM_022410	17886	Mm.29677	NM_022410	ENSMUSG00000022443	Myh9	Fltn|Myhn-1|Myhn1|NMHCIIA|NMMHC-A|NMMHC-IIA|TU72.6	myosin, heavy polypeptide 9, non-muscle	protein-coding
1267-2	chr17	29396472	29397737	+	619	Intergenic	Intergenic	36190	NM_001159538	26382	Mm.279187	NM_013710	ENSMUSG00000024013	Fgd2	Tcd-2|Tcd2|ZFYVE4|tcs-2|tcs2	FYVE, RhoGEF and PH domain containing 2	protein-coding
851-2	chr19	21271743	21272592	+	618	promoter-TSS (NM_009551)	promoter-TSS (NM_009551)	-111	NM_009551	22682	Mm.292405	NM_009551	ENSMUSG00000024750	Zfand5	2310057A04Rik|5830475F03Rik|AA415485|Za20d2|Zfp216	zinc finger, AN1-type domain 5	protein-coding
1216-3	chr15	77408762	77409976	+	618	intron (NM_001162883, intron 1 of 2)	RLTR11A2|LTR|ERVK	1665	NM_173786	223672	Mm.243758	NM_173786	ENSMUSG00000057346	Apol9a	-	apolipoprotein L 9a	protein-coding
1129-9	chr7	123371770	123372897	+	618	Intergenic	RSINE1|SINE|B4	-2418	NM_001316713	70497	Mm.403318	NM_144529	ENSMUSG00000030766	Arhgap17	5730403H17Rik|Nadrin|Nadrin2|Rich1|Wbp15	Rho GTPase activating protein 17	protein-coding
1098	chr10	67585300	67586396	+	618	Intergenic	Intergenic	-13889	NR_155444	105245193	Mm.72938	NR_155444		4930563J15Rik	-	RIKEN cDNA 4930563J15 gene	ncRNA
1314-3	chr3	143218807	143220119	+	618	Intergenic	(TGG)n|Simple_repeat|Simple_repeat	-23592	NR_040551	320072	Mm.136397	NR_040551	ENSMUSG00000105923	A830019L24Rik	-	RIKEN cDNA A830019L24 gene	ncRNA
1197-4	chr3	101940031	101941226	+	618	Intergenic	L1M1|LINE|L1	-16175	NM_001039371	242126	Mm.90204	NM_001039371	ENSMUSG00000033147	Slc22a15	2610034P21Rik|4930477M19|A530052I06Rik|BB219042	solute carrier family 22 (organic anion/cation transporter), member 15	protein-coding
1053-5	chr15	27905485	27906536	+	618	intron (NM_001081302, intron 3 of 56)	(TC)n|Simple_repeat|Simple_repeat	119838	NM_001081302	223435	Mm.485422	NM_001081302	ENSMUSG00000022263	Trio	6720464I07Rik|AA408740|Solo	triple functional domain (PTPRF interacting)	protein-coding
1000-2	chr11	55497489	55498487	+	618	exon (NM_013716, exon 10 of 12)	exon (NM_013716, exon 10 of 12)	-3238	NR_106112	102465760		NR_106112	ENSMUSG00000098906	Mir7652	Gm27932|mmu-mir-7652	microRNA 7652	ncRNA
1076-2	chr15	80318863	80319937	+	618	intron (NM_001044308, intron 2 of 36)	intron (NM_001044308, intron 2 of 36)	32162	NM_001044308	239556	Mm.291058	NM_001044308	ENSMUSG00000022416	Cacna1i	Ca(V)3.3	calcium channel, voltage-dependent, alpha 1I subunit	protein-coding
1090-9	chr5	134710598	134711686	+	618	exon (NM_007925, exon 27 of 37)	exon (NM_007925, exon 27 of 37)	-22552	NM_010717	16885	Mm.15409	NM_010717	ENSMUSG00000029674	Limk1	KIZ-1|LIMK-1|Limk	LIM-domain containing, protein kinase	protein-coding
949-2	chr3	19693817	19694764	+	618	exon (NM_205769, exon 2 of 2)	exon (NM_205769, exon 2 of 2)	1106	NM_205769	12918	Mm.290689	NM_205769	ENSMUSG00000049796	Crh	CRF|Gm1347	corticotropin releasing hormone	protein-coding
1169-5	chr16	30143851	30145018	+	618	Intergenic	Intergenic	79077	NM_008235	15205	Mm.390859	NM_008235	ENSMUSG00000022528	Hes1	Hry|bHLHb39	hes family bHLH transcription factor 1	protein-coding
1013-4	chr3	102098003	102099014	+	618	intron (NM_001355663, intron 1 of 11)	RLTR15|LTR|ERVK	12093	NM_009814	12373	Mm.15343	NM_009814	ENSMUSG00000027861	Casq2	AA033488|AW146219|Csq2|ESTM52|cCSQ	calsequestrin 2	protein-coding
997-3	chr12	116094624	116095619	+	617	intron (NM_009511, intron 4 of 12)	intron (NM_009511, intron 4 of 12)	17395	NM_009511	22355	Mm.395245	NM_009511	ENSMUSG00000011171	Vipr2	VPAC2|VPAC2R|Vip2	vasoactive intestinal peptide receptor 2	protein-coding
1099-2	chr12	116305515	116306612	+	617	intron (NM_028731, intron 1 of 21)	Lx7|LINE|L1	24841	NM_028731	52635	Mm.273755	NM_028731	ENSMUSG00000021171	Esyt2	2410017M09Rik|4921504I16Rik|CHR2SYT|D12Ertd551e|Fam62b	extended synaptotagmin-like protein 2	protein-coding
1300-2	chr14	31568786	31570084	+	617	intron (NM_009937, intron 1 of 16)	intron (NM_009937, intron 1 of 16)	7948	NM_009937	382864	Mm.239821	NM_009937	ENSMUSG00000057606	Colq	A130034K24Rik	collagen-like tail subunit (single strand of homotrimer) of asymmetric acetylcholinesterase	protein-coding
1186-5	chr6	91467966	91469150	+	617	intron (NM_133928, intron 1 of 2)	intron (NM_133928, intron 1 of 2)	4865	NM_133928	72170	Mm.41622	NM_133928	ENSMUSG00000034203	Chchd4	2410012P20Rik|2810014D17Rik|AI838740	coiled-coil-helix-coiled-coil-helix domain containing 4	protein-coding
845-6	chr2	168468692	168469535	+	617	Intergenic	Intergenic	121252	NM_001291178	18019	Mm.116802	NM_010899	ENSMUSG00000027544	Nfatc2	AI607462|NF-ATc2|NF-ATp|NFAT1|NFAT1-D|Nfatp	nuclear factor of activated T cells, cytoplasmic, calcineurin dependent 2	protein-coding
1310-3	chr7	24369254	24370562	+	617	promoter-TSS (NM_001163510)	promoter-TSS (NM_001163510)	-355	NM_001163510	16534	Mm.9911	NM_008433	ENSMUSG00000054342	Kcnn4	IK1|IKCA1|KCA4|KCa3.1|SK4|SKCas|mIKCa1	potassium intermediate/small conductance calcium-activated channel, subfamily N, member 4	protein-coding
1305-3	chr17	24426025	24427328	+	616	promoter-TSS (NM_010023)	promoter-TSS (NM_010023)	-7	NM_010023	13177	Mm.291743	NM_010023	ENSMUSG00000024132	Eci1	Dci|eci	enoyl-Coenzyme A delta isomerase 1	protein-coding
1057-5	chr17	84025736	84026791	+	616	Intergenic	Intergenic	27711	NR_130994	78148	Mm.243918	NR_130994	ENSMUSG00000117431	8430430B14Rik	-	RIKEN cDNA 8430430B14 gene	ncRNA
1184-9	chr3	88057977	88059159	+	616	promoter-TSS (NM_144897)	promoter-TSS (NM_144897)	-73	NM_144897	246703	Mm.205996	NM_144897	ENSMUSG00000028070	Naxe	AA087124|AI-BP|AIBP|Apoa1bp|Apoa1ip|ESTM37	NAD(P)HX epimerase	protein-coding
1321	chr16	87744769	87746088	+	616	Intergenic	Intergenic	46474	NM_007520	12013	Mm.26147	NM_007520	ENSMUSG00000025612	Bach1	6230421P05Rik|AI323795	BTB and CNC homology 1, basic leucine zipper transcription factor 1	protein-coding
1161-4	chr2	124482267	124483426	+	616	intron (NM_001290997, intron 4 of 20)	intron (NM_001290997, intron 4 of 20)	-127450	NM_199238	214968	Mm.330536	NM_172537	ENSMUSG00000027200	Sema6d	1110067B02Rik|AA409156|D330011G23|mKIAA1479	sema domain, transmembrane domain (TM), and cytoplasmic domain, (semaphorin) 6D	protein-coding
1370	chr12	25117526	25118894	+	616	Intergenic	Intergenic	-10964	NR_045844	432641	Mm.112955	NR_045844		Gm17746	-	predicted gene, 17746	ncRNA
1302	chr10	120466670	120467970	+	616	intron (NM_010441, intron 2 of 4)	intron (NM_010441, intron 2 of 4)	9149	NM_001347170	15364	Mm.157190	NM_010441	ENSMUSG00000056758	Hmga2	9430083A20Rik|HMGI-C|Hmgic|pg|pygmy	high mobility group AT-hook 2	protein-coding
1142-4	chr5	32444780	32445920	+	616	Intergenic	Intergenic	-13620	NM_172707	19046	Mm.241931	NM_172707	ENSMUSG00000014956	Ppp1cb	1200010B19	protein phosphatase 1 catalytic subunit beta	protein-coding
1316-6	chr4	16163454	16164768	+	616	promoter-TSS (NR_045765)	promoter-TSS (NR_045765)	1	NR_045765	100415915	Mm.387180	NR_045765	ENSMUSG00000085112	A530072M11Rik	-	RIKEN cDNA gene A530072M11	ncRNA
1513	chr15	12116245	12117756	+	616	promoter-TSS (NM_011767)	promoter-TSS (NM_011767)	-851	NM_011767	22763	Mm.273496	NM_011767	ENSMUSG00000022201	Zfr	C920030H05Rik	zinc finger RNA binding protein	protein-coding
1017	chr11	119198416	119199431	+	616	intron (NM_001347625, intron 3 of 11)	intron (NM_001347625, intron 3 of 11)	29576	NM_001347625	207592	Mm.205263	NM_172443	ENSMUSG00000039976	Tbc1d16	B930087K01|BC026530|Tcd1d16	TBC1 domain family, member 16	protein-coding
1180-4	chr16	31149766	31150944	+	616	intron (NM_030138, intron 4 of 22)	MER5A|DNA|hAT-Charlie	50883	NM_030138	78618	Mm.274646	NM_030138	ENSMUSG00000049076	Acap2	4832442G16|9530039J15Rik|CNT-B2|Centb2|mKIAA0041	ArfGAP with coiled-coil, ankyrin repeat and PH domains 2	protein-coding
1366	chr12	108206212	108207576	+	616	intron (NM_001159910, intron 5 of 5)	intron (NM_001159910, intron 5 of 5)	27156	NM_009832	12454	Mm.474441	NM_009832	ENSMUSG00000021258	Ccnk	AW123198|AW413594|CPR4|CycK	cyclin K	protein-coding
1207-2	chr11	101732202	101733407	+	615	promoter-TSS (NM_144831)	promoter-TSS (NM_144831)	-152	NM_144831	217207	Mm.28186	NM_144831	ENSMUSG00000034931	Dhx8	Ddx8|mDEAH6|mKIAA4096	DEAH (Asp-Glu-Ala-His) box polypeptide 8	protein-coding
1041-2	chr10	36848454	36849493	+	615	Intergenic	(CACAG)n|Simple_repeat|Simple_repeat	-125571	NM_008229	15182	Mm.19806	NM_008229	ENSMUSG00000019777	Hdac2	D10Wsu179e|YAF1|Yy1bp|mRPD3	histone deacetylase 2	protein-coding
900	chr11	6274283	6275181	+	615	exon (NM_134020, exon 1 of 5)	exon (NM_134020, exon 1 of 5)	105	NM_134020	103694	Mm.254495	NM_134020	ENSMUSG00000004394	Tmed4	1110014L17Rik|AI326346	transmembrane p24 trafficking protein 4	protein-coding
850-7	chr18	68800560	68801408	+	615	Intergenic	Intergenic	61584	NR_105774	102465183		NR_105774	ENSMUSG00000099300	Mir6356	Gm27461|mmu-mir-6356	microRNA 6356	ncRNA
1016-6	chr7	90307575	90308589	+	615	intron (NM_001368878, intron 1 of 19)	intron (NM_001368878, intron 1 of 19)	5653	NM_001368878	83671	Mm.26751	NM_031394	ENSMUSG00000030616	Sytl2	AI266830|Slp2|mKIAA1597	synaptotagmin-like 2	protein-coding
1111-5	chr9	21166040	21167149	+	615	intron (NM_183408, intron 1 of 14)	intron (NM_183408, intron 1 of 14)	880	NM_183408	18577	Mm.191749	NM_019798	ENSMUSG00000032177	Pde4a	D9Ertd60e|Dpde2	phosphodiesterase 4A, cAMP specific	protein-coding
1039-5	chr19	3643121	3644158	+	615	intron (NM_008513, intron 5 of 22)	intron (NM_008513, intron 5 of 22)	42925	NM_008513	16973	Mm.274581	NM_008513	ENSMUSG00000024913	Lrp5	BMND1|HBM|LR3|LRP7|OPPG|mKIAA4142	low density lipoprotein receptor-related protein 5	protein-coding
1225-2	chrX	82463912	82465135	+	615	Intergenic	L1_Mur2|LINE|L1	-484347	NM_007868	13405	Mm.275608	NM_007868	ENSMUSG00000045103	Dmd	DXSmh7|DXSmh9|Dp427|Dp71|dys|mdx|pke	dystrophin, muscular dystrophy	protein-coding
964-2	chr6	97210044	97211006	+	615	promoter-TSS (NM_022992)	promoter-TSS (NM_022992)	-267	NM_022992	65106	Mm.291014	NM_022992	ENSMUSG00000035199	Arl6ip5	5930404D22Rik|AV001879|Aip-5|Gtrap3-18|addiscin	ADP-ribosylation factor-like 6 interacting protein 5	protein-coding
1307-2	chr15	77784325	77785630	+	614	intron (NM_022410, intron 14 of 40)	intron (NM_022410, intron 14 of 40)	-27967	NM_001357895	239552	Mm.125650	NM_001081970	ENSMUSG00000056656	Apol8	9830006J20Rik|APOL-II|Apol2	apolipoprotein L 8	protein-coding
1136-2	chr11	49728818	49729952	+	614	Intergenic	Intergenic	-16663	NM_001363356	104625	Mm.247113	NM_212484	ENSMUSG00000020362	Cnot6	CCR4	CCR4-NOT transcription complex, subunit 6	protein-coding
972-2	chr10	95178472	95179442	+	614	intron (NM_001330175, intron 2 of 2)	L1MB3|LINE|L1	-33132	NR_131146	628062		NR_131146	ENSMUSG00000112481	Gm29684	-	predicted gene, 29684	ncRNA
1107-11	chr5	129526802	129527907	+	614	intron (NM_172276, intron 7 of 17)	intron (NM_172276, intron 7 of 17)	26123	NM_172276	231769	Mm.288714	NM_172276	ENSMUSG00000029439	Sfswap	1190005N23Rik|6330437E22Rik|AI197402|AW212079|SWAP|Sfrs8|Srsf8	splicing factor SWAP	protein-coding
859-2	chr2	157134667	157135524	+	614	promoter-TSS (NM_001139520)	promoter-TSS (NM_001139520)	1	NM_001370610	56045	Mm.248478	NM_018851	ENSMUSG00000027639	Samhd1	E330031J07Rik|Mg11|mSAMHD1	SAM domain and HD domain, 1	protein-coding
990-8	chrX	12967210	12968198	+	614	Intergenic	MTC-int|LTR|ERVL-MaLR	-10169	NR_153101	75037	Mm.387976	NR_153101		4930500G05Rik	-	RIKEN cDNA 4930500G05 gene	ncRNA
1859	chr1	119177833	119179690	+	614	Intergenic	(CAG)n|Simple_repeat|Simple_repeat	-125142	NM_001081125	14633	Mm.273292	NM_001081125	ENSMUSG00000048402	Gli2	-	GLI-Kruppel family member GLI2	protein-coding
1045-3	chr12	75928222	75929265	+	614	intron (NM_001005510, intron 27 of 115)	intron (NM_001005510, intron 27 of 115)	19640	NR_039560	100628610		NR_039560	ENSMUSG00000092922	Mir5101	mmu-mir-5101|mu-mir-5101	microRNA 5101	ncRNA
1280-8	chr3	90519833	90521111	+	614	intron (NM_009113, intron 3 of 3)	ID_B1|SINE|B4	6037	NM_009113	20196	Mm.6523	NM_009113	ENSMUSG00000042312	S100a13	-	S100 calcium binding protein A13	protein-coding
959-8	chr5	137684206	137685163	+	614	promoter-TSS (NM_001303271)	promoter-TSS (NM_001303271)	69	NM_001303271	231801	Mm.260869	NM_145566	ENSMUSG00000029722	Agfg2	A630095P14Rik|Hrbl|RAB-R|RABR	ArfGAP with FG repeats 2	protein-coding
874-4	chr3	95793576	95794448	+	614	intron (NM_028328, intron 1 of 8)	intron (NM_028328, intron 1 of 8)	24941	NM_001368178	75137	Mm.196275	NM_028328	ENSMUSG00000028106	Rprd2	2810036A19Rik|4930535B03Rik|6720469I21Rik|AL022841|AL022940|AU021304|BB077382|mKIAA0460	regulation of nuclear pre-mRNA domain containing 2	protein-coding
1377	chr15	102377391	102378766	+	614	Intergenic	Intergenic	-11110	NM_001348205	170574	Mm.263284	NM_130458	ENSMUSG00000060284	Sp7	6430578P22Rik|C22|Osx	Sp7 transcription factor 7	protein-coding
1182	chr1	43550813	43551993	+	613	intron (NM_010879, intron 3 of 4)	intron (NM_010879, intron 3 of 4)	105652	NM_010879	17974	Mm.389903	NM_010879	ENSMUSG00000066877	Nck2	4833426I10Rik|Grb4|NCKbeta|Nck-2	non-catalytic region of tyrosine kinase adaptor protein 2	protein-coding
1125	chr11	5207143	5208266	+	613	intron (NM_032396, intron 5 of 8)	ORR1E-int|LTR|ERVL-MaLR	53906	NM_032396	84035	Mm.209989	NM_032396	ENSMUSG00000020393	Kremen1	AV002070|Kremen|Krm1	kringle containing transmembrane protein 1	protein-coding
1113	chr11	102774289	102775400	+	613	intron (NM_001110778, intron 17 of 25)	CpG-2684	13409	NM_001110778	11488	Mm.89854	NM_009613	ENSMUSG00000020926	Adam11	AW060611|Mdc	a disintegrin and metallopeptidase domain 11	protein-coding
1292-7	chr8	75090179	75091469	+	613	Intergenic	MIR|SINE|MIR	-2794	NM_010442	15368	Mm.276389	NM_010442	ENSMUSG00000005413	Hmox1	D8Wsu38e|HO-1|HO1|Hemox|Hmox|Hsp32	heme oxygenase 1	protein-coding
977-2	chr15	77785771	77786746	+	613	intron (NM_022410, intron 13 of 40)	intron (NM_022410, intron 13 of 40)	-29248	NM_001357895	239552	Mm.125650	NM_001081970	ENSMUSG00000056656	Apol8	9830006J20Rik|APOL-II|Apol2	apolipoprotein L 8	protein-coding
1026-5	chr8	61649935	61650959	+	613	intron (NM_001293772, intron 10 of 21)	(CAA)n|Simple_repeat|Simple_repeat	-59308	NM_001293774	72333	Mm.29933	NM_001081390	ENSMUSG00000058056	Palld	2410003B16Rik|6030492A02	palladin, cytoskeletal associated protein	protein-coding
894-4	chr7	34348267	34349159	+	613	intron (NM_001360656, intron 8 of 9)	MTEb|LTR|ERVL-MaLR	40992	NM_001360654	67070	Mm.276503	NM_025948	ENSMUSG00000066568	Lsm14a	2700023B17Rik|AA407828|AU017544|Tral|mRAP55A	LSM14A mRNA processing body assembly factor	protein-coding
1192	chr1	192806373	192807563	+	613	Intergenic	Intergenic	28245	NR_155503	320952	Mm.100944	NR_155503		A730013G03Rik	-	RIKEN cDNA A730013G03 gene	ncRNA
1201-2	chr12	85454852	85456051	+	612	Intergenic	CpG	-18439	NM_010234	14281	Mm.246513	NM_010234	ENSMUSG00000021250	Fos	D12Rfj1|c-fos|cFos	FBJ osteosarcoma oncogene	protein-coding
1181-4	chr3	86645711	86646890	+	612	intron (NM_030695, intron 46 of 56)	L1_Mur3|LINE|L1	-98017	NM_011839	23937	Mm.389466	NM_011839	ENSMUSG00000057777	Mab21l2	-	mab-21-like 2	protein-coding
964-3	chr8	13914529	13915491	+	612	exon (NM_025785, exon 2 of 10)	exon (NM_025785, exon 2 of 10)	7271	NM_001359061	66822	Mm.37950	NM_025785	ENSMUSG00000038365	Fbxo25	9130015I06Rik|AI649137|Fbx25	F-box protein 25	protein-coding
870-5	chr5	102695252	102696120	+	612	intron (NM_029270, intron 3 of 9)	(CAG)n|Simple_repeat|Simple_repeat	-73124	NM_001286468	231532	Mm.440191	NM_029270	ENSMUSG00000057315	Arhgap24	0610025G21Rik	Rho GTPase activating protein 24	protein-coding
1235	chr2	30847722	30848955	+	612	intron (NM_009116, intron 1 of 3)	intron (NM_009116, intron 1 of 3)	2971	NM_009116	20204	Mm.1802	NM_009116	ENSMUSG00000039476	Prrx2	Prx2|S8	paired related homeobox 2	protein-coding
1276-6	chr9	110623726	110625000	+	612	promoter-TSS (NM_026012)	promoter-TSS (NM_026012)	30	NM_026012	67169	Mm.46680	NM_026012	ENSMUSG00000032491	Nradd	2610311B09Rik|BB104149|NRDD|NRH2|PLAIDD	neurotrophin receptor associated death domain	protein-coding
1312	chr10	80055929	80057239	+	612	TTS (NM_008162)	TTS (NM_008162)	2573	NM_001037741	625249	Mm.332810	NM_008162	ENSMUSG00000075706	Gpx4	GPx-4|GSHPx-4|PHGPx|mtPHGPx|snGPx	glutathione peroxidase 4	protein-coding
1275-4	chr15	76201739	76203012	+	612	intron (NM_011117, intron 1 of 31)	intron (NM_011117, intron 1 of 31)	-1768	NM_201390	18810	Mm.234912	NM_011117	ENSMUSG00000022565	Plec	AA591047|AU042537|EBS1|PCN|PLTN|Plec1	plectin	protein-coding
1089-6	chr4	150692384	150693471	+	612	Intergenic	Intergenic	-40753	NM_173774	242773	Mm.29280	NM_173774	ENSMUSG00000039838	Slc45a1	C230078B22|Dnb5	solute carrier family 45, member 1	protein-coding
1497	chr15	98850299	98851794	+	612	exon (NM_001033276, exon 35 of 55)	exon (NM_001033276, exon 35 of 55)	-19538	NM_016781	19082	Mm.6670	NM_016781	ENSMUSG00000067713	Prkag1	AA571379|BB036179|Prkaac	protein kinase, AMP-activated, gamma 1 non-catalytic subunit	protein-coding
1112-3	chr15	89073936	89075046	+	611	intron (NR_040417, intron 1 of 3)	intron (NR_040417, intron 1 of 3)	1363	NR_040417	69120	Mm.276391	NR_040417	ENSMUSG00000087331	1810021B22Rik	-	RIKEN cDNA 1810021B22 gene	ncRNA
1229-3	chr16	76293243	76294470	+	611	exon (NM_001358238, exon 4 of 4)	exon (NM_001358238, exon 4 of 4)	79193	NM_173440	268903	Mm.74711	NM_173440	ENSMUSG00000048490	Nrip1	6030458L20Rik|8430438I05Rik|9630050P12|AA959574|AW456757|RIP140	nuclear receptor interacting protein 1	protein-coding
1049-2	chr10	108065846	108066893	+	611	Intergenic	Intergenic	-95729	NM_001368736	17931	Mm.422959	NM_027892	ENSMUSG00000019907	Ppp1r12a	1200015F06Rik|5730577I22Rik|AA792106|AV099298|D10Ertd625e|Mypt1	protein phosphatase 1, regulatory subunit 12A	protein-coding
1736-2	chr2	26906879	26908613	+	611	3' UTR (NM_011513, exon 3 of 3)	3' UTR (NM_011513, exon 3 of 3)	2896	NM_011513	20933	Mm.397932	NM_011513	ENSMUSG00000015776	Med22	AW212655|AW558812|Surf-5|Surf5	mediator complex subunit 22	protein-coding
1343	chr15	74040239	74041580	+	611	Intergenic	Intergenic	-201238	NM_001033365	268816	Mm.440635	NM_001033365	ENSMUSG00000072487	Mroh5	Gm628	maestro heat-like repeat family member 5	protein-coding
1134-3	chr13	49276699	49277831	+	611	intron (NM_015759, intron 11 of 17)	B4A|SINE|B4	-28559	NM_028340	66329	Mm.34308	NM_025491	ENSMUSG00000021384	Susd3	1700017I11Rik|2810440J20Rik	sushi domain containing 3	protein-coding
1329-2	chr8	126497116	126498443	+	611	Intergenic	Intergenic	-22714	NM_001159907	212728	Mm.482479	NM_001159907	ENSMUSG00000090290	Tarbp1	Gm17296|Gm179	TAR RNA binding protein 1	protein-coding
1026-4	chr15	99250866	99251890	+	611	promoter-TSS (NR_045627)	promoter-TSS (NR_045627)	-410	NR_045627	73600	Mm.475134	NR_045627	ENSMUSG00000100599	1700120C14Rik	-	RIKEN cDNA 1700120C14 gene	ncRNA
1238-2	chr17	87770278	87771514	+	611	intron (NM_199251, intron 1 of 1)	intron (NM_199251, intron 1 of 1)	27098	NM_199251	210741	Mm.312046	NM_199251	ENSMUSG00000050138	Kcnk12	mntk1	potassium channel, subfamily K, member 12	protein-coding
1090-8	chr3	101405551	101406639	+	610	intron (NM_207205, intron 2 of 10)	intron (NM_207205, intron 2 of 10)	28970	NM_207205	78908	Mm.257997	NM_207205	ENSMUSG00000042035	Igsf3	1700016K10Rik|2810035F16Rik|4833439O17Rik|mKIAA0466	immunoglobulin superfamily, member 3	protein-coding
1346-2	chr12	116280205	116281549	+	610	promoter-TSS (NM_028731)	promoter-TSS (NM_028731)	-345	NM_028731	52635	Mm.273755	NM_028731	ENSMUSG00000021171	Esyt2	2410017M09Rik|4921504I16Rik|CHR2SYT|D12Ertd551e|Fam62b	extended synaptotagmin-like protein 2	protein-coding
989-6	chr2	24810323	24811310	+	610	intron (NM_001012518, intron 18 of 26)	(CAG)n|Simple_repeat|Simple_repeat	-47664	NM_007579	12287	Mm.4424	NM_007579	ENSMUSG00000004113	Cacna1b	AW050276|AW060892|AW822256|BIII|Cav2.2|Cchn1a|alpha(1B)	calcium channel, voltage-dependent, N type, alpha 1B subunit	protein-coding
1210-10	chr8	123317984	123319192	+	610	promoter-TSS (NM_016925)	promoter-TSS (NM_016925)	-12	NM_016925	14087	Mm.6536	NM_016925	ENSMUSG00000032815	Fanca	AW208693|FACA	Fanconi anemia, complementation group A	protein-coding
1099-5	chr2	174488283	174489380	+	610	Intergenic	Intergenic	-15890	NM_025531	66390	Mm.182294	NM_025531	ENSMUSG00000016257	Prelid3b	2310042G06Rik|AA407013|Slmo2	PRELI domain containing 3B	protein-coding
1057-4	chr14	70544627	70545682	+	610	promoter-TSS (NM_180588)	promoter-TSS (NM_180588)	-97	NM_180588	72549	Mm.46742	NM_180588	ENSMUSG00000033589	Reep4	2700029E10Rik	receptor accessory protein 4	protein-coding
1288-2	chr15	84359606	84360892	+	610	Intergenic	Intergenic	34130	NM_001162500	64099	Mm.251356	NM_022321	ENSMUSG00000022439	Parvg	AI413459	parvin, gamma	protein-coding
1027-4	chr16	96432145	96433170	+	610	exon (NM_008405, exon 8 of 16)	exon (NM_008405, exon 8 of 16)	10957	NM_008405	16415	Mm.12872	NM_008405	ENSMUSG00000000157	Itgb2l	5033406G21Rik|pactolus	integrin beta 2-like	protein-coding
1314	chr12	51703307	51704619	+	610	intron (NM_021710, intron 1 of 5)	intron (NM_021710, intron 1 of 5)	-12049	NM_052973	94186	Mm.65979	NM_052973	ENSMUSG00000020954	Strn3	Gs2na|SG2NA	striatin, calmodulin binding protein 3	protein-coding
1174-4	chr3	11245149	11246321	+	610	Intergenic	(CAG)n|Simple_repeat|Simple_repeat	598624	NR_040751	100038545	Mm.388494	NR_040751	ENSMUSG00000104015	Gm10745	-	predicted gene 10745	ncRNA
1095	chr15	99983184	99984277	+	610	intron (NM_001284521, intron 1 of 15)	intron (NM_001284521, intron 1 of 15)	-10443	NR_028124	70281	Mm.484037	NR_028124	ENSMUSG00000100084	2310068J16Rik	-	RIKEN cDNA 2310068J16 gene	ncRNA
879-3	chr19	5445711	5446588	+	609	Intergenic	Intergenic	-1549	NM_010235	14283	Mm.6215	NM_010235	ENSMUSG00000024912	Fosl1	AW538199|Fra1|fra-1	fos-like antigen 1	protein-coding
987-2	chr15	38315320	38316305	+	609	Intergenic	Intergenic	-15101	NM_001289471	21847	Mm.4292	NM_013692	ENSMUSG00000037465	Klf10	AI115143|EGR[a]|Egral|Gdnfif|TIEG-1|Tieg|Tieg1|mGIF	Kruppel-like factor 10	protein-coding
1220-2	chr15	75929095	75930313	+	609	promoter-TSS (NM_031201)	promoter-TSS (NM_031201)	26	NM_031201	22122	Mm.22596	NM_031201	ENSMUSG00000022570	Tsta3	AI256181|FX|Tstap35b	tissue specific transplantation antigen P35B	protein-coding
1221-2	chr12	108809182	108810401	+	609	intron (NM_009537, intron 2 of 4)	intron (NM_009537, intron 2 of 4)	16494	NM_009537	22632	Mm.3868	NM_009537	ENSMUSG00000021264	Yy1	NF-E1|YY-1	YY1 transcription factor	protein-coding
1081	chr1	93679782	93680861	+	609	Intergenic	Intergenic	-5254	NM_016778	51800	Mm.3295	NM_016778	ENSMUSG00000026278	Bok	matador|mtd	BCL2-related ovarian killer	protein-coding
1136-6	chr19	44238574	44239708	+	609	intron (NM_024450, intron 5 of 5)	intron (NM_024450, intron 5 of 5)	35853	NM_024450	30049	Mm.480594	NM_024450	ENSMUSG00000025202	Scd3	4930513N16Rik	stearoyl-coenzyme A desaturase 3	protein-coding
1279-2	chr11	106193449	106194726	+	609	promoter-TSS (NM_001252448)	promoter-TSS (NM_001252448)	-484	NM_001252449	72149	Mm.403722	NM_028126	ENSMUSG00000069631	Strada	2610019A05Rik|6030402H20Rik|AI480680|E130112C09Rik	STE20-related kinase adaptor alpha	protein-coding
1176	chr1	134091334	134092508	+	609	Intergenic	Intergenic	-12766	NM_007570	12227	Mm.392646	NM_007570	ENSMUSG00000020423	Btg2	AA959598|APRO1|Pc3|TIS21	B cell translocation gene 2, anti-proliferative	protein-coding
1196-3	chr2	165486711	165487905	+	608	Intergenic	Intergenic	6006	NM_001007581	381406	Mm.330785	NM_001007581	ENSMUSG00000039725	Trp53rka	2810408M09Rik	transformation related protein 53 regulating kinase A	protein-coding
1171	chr10	122819239	122820408	+	608	intron (NM_176919, intron 4 of 8)	intron (NM_176919, intron 4 of 8)	140508	NR_106182	102466884		NR_106182	ENSMUSG00000099225	Mir8104	Gm27380|mmu-mir-8104	microRNA 8104	ncRNA
861-3	chr3	32396307	32397166	+	608	Intergenic	Intergenic	-31071	NM_009517	22401	Mm.35705	NM_009517	ENSMUSG00000027663	Zmat3	Wig1	zinc finger matrin type 3	protein-coding
1091-7	chr16	5304056	5305145	+	607	Intergenic	Intergenic	-48644	NM_027446	70511	Mm.45780	NM_027446	ENSMUSG00000022544	Eef2kmt	5730409G15Rik|Fam86|Fam86a|eEF2-KMT	eukaryotic elongation factor 2 lysine methyltransferase	protein-coding
1003-5	chr2	27038588	27039589	+	607	Intergenic	Intergenic	-11090	NM_001177627	227659	Mm.41203	NM_172659	ENSMUSG00000036067	Slc2a6	A330096C23|F630103L12Rik|Glut6|Glut9	solute carrier family 2 (facilitated glucose transporter), member 6	protein-coding
1047	chr11	119267520	119268565	+	607	promoter-TSS (NM_008064)	promoter-TSS (NM_008064)	79	NM_008064	14387	Mm.4793	NM_008064	ENSMUSG00000025579	Gaa	E430018M07Rik	glucosidase, alpha, acid	protein-coding
865-4	chr7	127421350	127422213	+	607	intron (NM_026999, intron 1 of 2)	intron (NM_026999, intron 1 of 2)	253	NM_026999	69234	Mm.20301	NM_026999	ENSMUSG00000045251	Zfp688	2810407K09Rik|AI326029	zinc finger protein 688	protein-coding
1304-2	chr15	31342114	31343416	+	607	intron (NM_027496, intron 1 of 3)	intron (NM_027496, intron 1 of 3)	24994	NM_001357923	67434	Mm.102470	NM_026153	ENSMUSG00000022237	Ankrd33b	0610012A05Rik|3021401C12Rik|5730557B15Rik	ankyrin repeat domain 33B	protein-coding
1003-4	chr17	77295507	77296508	+	606	Intergenic	URR1A|DNA|hAT-Charlie	-904241	NM_015800	50766	Mm.311912	NM_015800	ENSMUSG00000024074	Crim1	AU015004	cysteine rich transmembrane BMP regulator 1 (chordin like)	protein-coding
1210-7	chr3	48289267	48290475	+	606	Intergenic	Intergenic	-263112	NR_040408	666202	Mm.465057	NR_040408	ENSMUSG00000103257	Gm7977	EG666202	tyrosine 3-monooxygenase/tryptophan 5-monooxygenase activation protein, theta polypeptide pseudogene	pseudo
1157-4	chr16	31593000	31594155	+	606	Intergenic	Intergenic	-24556	NM_001357871	224098	Mm.125439	NM_001357870		Gm536	Gm1777	predicted gene 536	protein-coding
1672	chr16	18391807	18393477	+	606	promoter-TSS (NM_001272031)	promoter-TSS (NM_001272031)	79	NM_001272032	11877	Mm.293599	NM_033474	ENSMUSG00000000325	Arvcf	-	armadillo repeat gene deleted in velocardiofacial syndrome	protein-coding
1240-6	chr8	121955602	121956840	+	606	intron (NM_001285981, intron 1 of 12)	intron (NM_001285981, intron 1 of 12)	5729	NM_001285983	53325	Mm.287163	NM_016812	ENSMUSG00000025316	Banp	AA408158|SMAR1	BTG3 associated nuclear protein	protein-coding
1114-6	chr5	118156290	118157402	+	606	Intergenic	RMER5|LTR|ERV1	-1388	NM_172721	231672	Mm.221769	NM_172721	ENSMUSG00000032867	Fbxw8	4930438M06Rik|FBW6|FBW8|FBXO29|Fbx29	F-box and WD-40 domain protein 8	protein-coding
1293-5	chrUn_GL456387	14585	15876	+	606	NA	Intergenic	NA	NA
1210-5	chr18	38016825	38018033	+	606	Intergenic	Intergenic	-18460	NM_001205336	106952	Mm.247642	NM_139206	ENSMUSG00000024451	Arap3	Centd3|Drag1|E030006K04Rik|cnt-d3	ArfGAP with RhoGAP domain, ankyrin repeat and PH domain 3	protein-coding
1042-2	chr2	35757681	35758721	+	606	intron (NM_029774, intron 9 of 9)	intron (NM_029774, intron 9 of 9)	-60989	NR_040618	77665	Mm.400558	NR_040618	ENSMUSG00000086449	9030204H09Rik	-	RIKEN cDNA 9030204H09 gene	ncRNA
1232	chr11	50212626	50213856	+	606	Intergenic	Intergenic	-2421	NM_011018	18412	Mm.40828	NM_011018	ENSMUSG00000015837	Sqstm1	A170|OSF-6|Osi|STAP|STONE14|p62	sequestosome 1	protein-coding
1197-6	chr4_GL456216_random	16516	17711	+	605	intron (NM_001368262, intron 1 of 5)	CpG	955	NM_001368261	236082	Mm.305345	NM_001033326	ENSMUSG00000063897	Dhrsx	C80877|D4Ertd296e|Dhrsxy|Pscad	dehydrogenase/reductase (SDR family) X chromosome	protein-coding
1180-7	chr2	167690267	167691445	+	605	promoter-TSS (NR_015500)	promoter-TSS (NR_015500)	97	NR_110334	329562	Mm.123101	NM_177851	ENSMUSG00000006462	A530013C23Rik	-	RIKEN cDNA A530013C23 gene	ncRNA
1400	chr15	3995065	3996463	+	605	promoter-TSS (NR_045740)	promoter-TSS (NR_045740)	-18	NM_145930	106064	Mm.21299	NM_145930	ENSMUSG00000041935	AW549877	AI195826	expressed sequence AW549877	protein-coding
1139	chr11	87929580	87930717	+	605	Intergenic	B2_Mm2|SINE|B2	-15145	NM_146412	258407	Mm.271337	NM_146412	ENSMUSG00000060787	Olfr464	MOR240-2	olfactory receptor 464	protein-coding
1021-5	chr2	173101879	173102898	+	605	intron (NM_001081387, intron 8 of 10)	B3|SINE|B2	17137	NM_001081387	664799	Mm.389396	NM_001081387	ENSMUSG00000070495	Ctcfl	Boris	CCCTC-binding factor (zinc finger protein)-like	protein-coding
1041-3	chr12	86857252	86858291	+	605	Intergenic	Intergenic	27043	NM_145836	238330	Mm.248358	NM_145836	ENSMUSG00000034168	Irf2bpl	6430527G18Rik|Eap1	interferon regulatory factor 2 binding protein-like	protein-coding
1216-5	chr6	85068673	85069887	+	604	intron (NM_177077, intron 1 of 21)	CpG	233	NM_177077	75914	Mm.159621	NM_177077	ENSMUSG00000033769	Exoc6b	4930569O18Rik|G430127E12Rik|Sec15b|Sec15l2|mKIAA0919	exocyst complex component 6B	protein-coding
1255-4	chr3	145648698	145649951	+	604	exon (NM_010516, exon 2 of 5)	exon (NM_010516, exon 2 of 5)	661	NM_010516	16007	Mm.1231	NM_010516	ENSMUSG00000028195	Ccn1	AI325051|Cyr61|Igfbp10	cellular communication network factor 1	protein-coding
1146-6	chr2	57237414	57238558	+	604	promoter-TSS (NM_010274)	promoter-TSS (NM_010274)	308	NM_001145820	14571	Mm.3711	NM_010274	ENSMUSG00000026827	Gpd2	AA408484|AI448216|AU021455|AW494132|GPDH|Gdm1|Gpd-m|Gpdh-m|TISP38	glycerol phosphate dehydrogenase 2, mitochondrial	protein-coding
1434	chr10	82265176	82266608	+	604	Intergenic	ORR1E|LTR|ERVL-MaLR	-24617	NM_001105557	237411		NM_172789	ENSMUSG00000062931	Zfp938	B230315N10Rik	zinc finger protein 938	protein-coding
896-3	chr11	120597098	120597992	+	604	promoter-TSS (NM_025389)	promoter-TSS (NM_025389)	820	NM_011568	21681	Mm.1886	NM_011568	ENSMUSG00000025134	Alyref	Aly|Ref1|Ref1-I|Refbp1|Tho4|Thoc4	Aly/REF export factor	protein-coding
1008-6	chr16	65473073	65474079	+	604	Intergenic	(CAG)n|Simple_repeat|Simple_repeat	-46936	NM_008849	18736	Mm.355440	NM_008849	ENSMUSG00000004842	Pou1f1	GHF-1|Hmp1|Pit-1|Pit1|Pit1-rs1|dw|dwarf	POU domain, class 1, transcription factor 1	protein-coding
1190-6	chr6	124828869	124830057	+	603	promoter-TSS (NM_001326594)	promoter-TSS (NM_001326594)	21	NM_001326594	22225	Mm.3571	NM_013700	ENSMUSG00000038429	Usp5	AA407472|ISOT|ISOT-1|Ucht	ubiquitin specific peptidase 5 (isopeptidase T)	protein-coding
996-2	chr2	153215033	153216027	+	603	Intergenic	Intergenic	9911	NM_198617	241732	Mm.277243	NM_198617	ENSMUSG00000074671	Tspyl3	AW212607|Gm36	TSPY-like 3	protein-coding
891	chr5	142360324	142361213	+	603	Intergenic	(CAG)n|Simple_repeat|Simple_repeat	-40729	NM_199068	17425	Mm.24214	NM_010812	ENSMUSG00000056493	Foxk1	A630048H08Rik|AI463295|Gm10868|Mnf	forkhead box K1	protein-coding
1129-7	chr5	111469994	111471121	+	603	Intergenic	Intergenic	53257	NM_001081235	433938	Mm.332576	NM_001081235	ENSMUSG00000070576	Mn1	AA003644|AA009236	meningioma 1	protein-coding
1029-10	chr9	61016323	61017350	+	603	promoter-TSS (NR_040767)	promoter-TSS (NR_040767)	-233	NR_040767	330956	Mm.207985	NR_040767	ENSMUSG00000111290	Gm5122	A430102L10	predicted gene 5122	ncRNA
1106-3	chr10	117533568	117534672	+	603	Intergenic	RSINE1|SINE|B4	-86685	NR_152734	102634600	Mm.399106	NR_152734	ENSMUSG00000112344	Gm32141	-	predicted gene, 32141	ncRNA
1125-8	chr5	139147413	139148536	+	602	intron (NM_001359097, intron 1 of 10)	L1MDb|LINE|L1	2027	NM_001359098	19085	Mm.306163	NM_008923	ENSMUSG00000025855	Prkar1b	AI385716|RIbeta	protein kinase, cAMP dependent regulatory, type I beta	protein-coding
1015-2	chr17	35234506	35235519	+	602	promoter-TSS (NM_001347351)	promoter-TSS (NM_001347351)	2	NM_001347351	66237	Mm.396107	NM_023179	ENSMUSG00000024403	Atp6v1g2	1500002D01Rik|Atp6g2|NG38|VAG2	ATPase, H+ transporting, lysosomal V1 subunit G2	protein-coding
814	chr2	51148577	51149389	+	602	5' UTR (NM_028810, exon 1 of 5)	5' UTR (NM_028810, exon 1 of 5)	128	NM_028810	74194	Mm.46497	NM_028810	ENSMUSG00000017144	Rnd3	2610017M01Rik|AI661404|Arhe|Rhoe	Rho family GTPase 3	protein-coding
1501	chr17	8670614	8672113	+	602	intron (NM_001290707, intron 1 of 22)	intron (NM_001290707, intron 1 of 22)	-130382	NM_011866	23984	Mm.87161	NM_011866	ENSMUSG00000023868	Pde10a	-	phosphodiesterase 10A	protein-coding
931-3	chr17	73697103	73698032	+	602	intron (NM_027864, intron 1 of 14)	intron (NM_027864, intron 1 of 14)	12884	NM_027864	71685	Mm.271953	NM_027864	ENSMUSG00000024064	Galnt14	0610033M06Rik	polypeptide N-acetylgalactosaminyltransferase 14	protein-coding
1259-6	chr8	13877761	13879018	+	602	exon (NM_181854, exon 2 of 2)	exon (NM_181854, exon 2 of 2)	8748	NM_001363455	101994	Mm.289346	NM_181854	ENSMUSG00000047710	Champ1	AA675043|AI116001|D8Ertd457e|D8Ertd569e|Zfp828|Znf828|mKIAA1802	chromosome alignment maintaining phosphoprotein 1	protein-coding
1440-3	chr2	167267626	167269064	+	602	Intergenic	Intergenic	-27740	NM_008968	19223	Mm.2339	NM_008968	ENSMUSG00000017969	Ptgis	Cyp8|Cyp8a1|Pgis	prostaglandin I2 (prostacyclin) synthase	protein-coding
1091	chr1	180723639	180724728	+	602	Intergenic	Intergenic	-1860	NM_133225	170760	Mm.272981	NM_133225	ENSMUSG00000026499	Acbd3	60kDa|8430407O11Rik|D1Ertd10e|GCP60|GOLPH1|Gocap1|Pap7	acyl-Coenzyme A binding domain containing 3	protein-coding
915-3	chr15	98633992	98634905	+	601	promoter-TSS (NM_001286226)	promoter-TSS (NM_001286226)	-319	NM_007581	12297	Mm.3544	NM_007581	ENSMUSG00000003352	Cacnb3	Beta3|CAB3|Ca(v)beta3|Cchb3	calcium channel, voltage-dependent, beta 3 subunit	protein-coding
1252-5	chr3	108681349	108682599	+	601	intron (NM_029522, intron 14 of 14)	(CAG)n|Simple_repeat|Simple_repeat	28034	NM_001177770	229725	Mm.214545	NM_145543	ENSMUSG00000027884	Clcc1	Mclc	chloride channel CLIC-like 1	protein-coding
1291	chr11	101789216	101790505	+	601	Intergenic	RSINE1|SINE|B4	-4550	NM_001316365	18612	Mm.5025	NM_008815	ENSMUSG00000017724	Etv4	AW414408|Pea-3|Pea3	ets variant 4	protein-coding
1299	chr10	81396545	81397842	+	601	3' UTR (NM_008688, exon 10 of 10)	3' UTR (NM_008688, exon 10 of 10)	4129	NM_001099917	72273	Mm.253147	NM_001099917	ENSMUSG00000078439	Smim24	2210404O07Rik	small integral membrane protein 24	protein-coding
1117-3	chr11	87461495	87462610	+	601	intron (NM_031386, intron 2 of 30)	CpG	34461	NM_001199293	83560	Mm.440758	NM_031386	ENSMUSG00000010342	Tex14	C85585	testis expressed gene 14	protein-coding
1172-6	chr7	130401014	130402184	+	600	intron (NM_001029895, intron 11 of 11)	(CAG)n|Simple_repeat|Simple_repeat	117981	NM_001136054	11907	Mm.216321	NM_013799	ENSMUSG00000030850	Ate1	AI225793|AW547406	arginyltransferase 1	protein-coding
853-2	chr15	7578195	7579046	+	600	Intergenic	Intergenic	-180225	NM_001289498	268780	Mm.203208	NM_178748	ENSMUSG00000042961	Egflam	5930412K08|AU040377	EGF-like, fibronectin type III and laminin G domains	protein-coding
1287-3	chr15	25983720	25985005	+	600	promoter-TSS (NM_144523)	promoter-TSS (NM_144523)	-4	NM_144523	52521	Mm.29145	NM_144523	ENSMUSG00000052253	Zfp622	1110033B05Rik|D15Ertd806e|ZPR9|Znf622	zinc finger protein 622	protein-coding
924-2	chr3	58576122	58577044	+	600	promoter-TSS (NM_001040396)	promoter-TSS (NM_001040396)	-53	NM_001040396	69227	Mm.270950	NM_001040396	ENSMUSG00000075700	Selenot	2810407C02Rik|5730408P04Rik|Selt	selenoprotein T	protein-coding
1332-3	chr15	78917030	78918360	+	600	intron (NM_020271, intron 1 of 1)	intron (NM_020271, intron 1 of 1)	3776	NM_020271	57028	Mm.263169	NM_020271	ENSMUSG00000116165	Pdxp	1600027H05Rik|AB041662|PLPP	pyridoxal (pyridoxine, vitamin B6) phosphatase	protein-coding
1900	chrX	32436564	32438462	+	600	Intergenic	Intergenic	-122542	NM_001168334	100040482	Mm.479861	NM_001168334	ENSMUSG00000096194	Btbd35f2	Gm2799	BTB domain containing 35, family member 2	protein-coding
1095-2	chr19	24615798	24616891	+	600	Intergenic	Intergenic	-57664	NM_183160	226040	Mm.391170	NM_183160	ENSMUSG00000048572	Tmem252	E030010A14Rik	transmembrane protein 252	protein-coding
1034	chr10	80751914	80752946	+	600	Intergenic	Intergenic	-2773	NM_199322	208266	Mm.152371	NM_199322	ENSMUSG00000061589	Dot1l	A630076O07|AW907654|Dot1|KMT4|mDot1	DOT1-like, histone H3 methyltransferase (S. cerevisiae)	protein-coding
1305-4	chr17	87850993	87852296	+	599	Intergenic	Intergenic	-53650	NM_199251	210741	Mm.312046	NM_199251	ENSMUSG00000050138	Kcnk12	mntk1	potassium channel, subfamily K, member 12	protein-coding
1207-4	chr17	86515303	86516508	+	599	intron (NM_011104, intron 10 of 14)	RLTR20A4|LTR|ERVK	-228727	NR_045435	72104	Mm.443401	NR_045435	ENSMUSG00000100738	2010106C02Rik	-	RIKEN cDNA 2010106C02 gene	ncRNA
856-4	chr2	30355954	30356808	+	599	intron (NR_156413, intron 1 of 10)	intron (NR_156413, intron 1 of 10)	2935	NR_156413	227700	Mm.33343	NM_139302	ENSMUSG00000026860	Sh3glb2	SPAS-1	SH3-domain GRB2-like endophilin B2	protein-coding
924-4	chrY	90824690	90825612	+	599	Intergenic	CpG	14255	NR_137283	654820	Mm.34441	NM_001039559	ENSMUSG00000072844	G530011O06Rik	-	RIKEN cDNA G530011O06 gene	ncRNA
927-7	chr4	95490678	95491603	+	599	Intergenic	(CAG)n|Simple_repeat|Simple_repeat	-66367	NM_001113412	75578	Mm.276098	NM_029347	ENSMUSG00000028573	Fggy	2310009E04Rik	FGGY carbohydrate kinase domain containing	protein-coding
914-7	chr6	114538427	114539339	+	599	Intergenic	IMPB_01|Satellite|Satellite	80361	NM_001317124	15465	Mm.333327	NM_008285	ENSMUSG00000053004	Hrh1	Bphs|H1R|HH1R|Hir	histamine receptor H1	protein-coding
1193-9	chr5	120346388	120347579	+	598	Intergenic	Intergenic	-84903	NM_008499	16873	Mm.5151	NM_008499	ENSMUSG00000029595	Lhx5	Lim2	LIM homeobox protein 5	protein-coding
1364-3	chr9	117789679	117791041	+	598	Intergenic	(CAG)n|Simple_repeat|Simple_repeat	-160447	NM_001172121	207181	Mm.326411	NM_178660	ENSMUSG00000039607	Rbms3	6720477E09Rik|8430436O14Rik	RNA binding motif, single stranded interacting protein	protein-coding
1090-5	chr16	21490841	21491929	+	598	intron (NM_001081366, intron 20 of 46)	L1M2|LINE|L1	68267	NM_001285894	209018	Mm.235683	NM_145948	ENSMUSG00000033653	Vps8	AI315068|AU040738|mKIAA0804	VPS8 CORVET complex subunit	protein-coding
1222-7	chr7	16618319	16619539	+	598	intron (NR_136929, intron 1 of 2)	intron (NR_136929, intron 1 of 2)	-3936	NM_172739	232906	Mm.28646	NM_172739	ENSMUSG00000058230	Arhgap35	6430596G11Rik|AI841135|Grlf1|mKIAA1722|p190A|p190RhoGAP	Rho GTPase activating protein 35	protein-coding
1259-4	chr2	71021304	71022561	+	598	intron (NM_001110512, intron 1 of 9)	L1MB3|LINE|L1	33674	NM_001110512	228019	Mm.490343	NM_145524	ENSMUSG00000041975	Mettl8	BC004636|Tip	methyltransferase like 8	protein-coding
931	chr11	92645449	92646378	+	598	Intergenic	Lx6|LINE|L1	-452453	NM_001361707	72605	Mm.342160	NM_028296	ENSMUSG00000056158	Car10	2700029L05Rik|BB085816|Ca10	carbonic anhydrase 10	protein-coding
1456-3	chr19	44146029	44147483	+	598	promoter-TSS (NM_028607)	promoter-TSS (NM_028607)	-310	NM_028607	73689	Mm.124685	NM_028607	ENSMUSG00000057506	Bloc1s2	2410089B13Rik|BLOS2|Bloc1s2a	biogenesis of lysosomal organelles complex-1, subunit 2	protein-coding
1305-5	chr8	123551979	123553282	+	598	promoter-TSS (NR_046152).3	promoter-TSS (NR_046152).3	-148	NR_046155	100861502		NR_046155	ENSMUSG00000095350	Gm23284	Rn5s31	predicted gene, 23284	rRNA
1240-2	chr15	63656984	63658222	+	598	Intergenic	Intergenic	151136	NM_031378	83492	Mm.335619	NM_031378	ENSMUSG00000079025	Gsdmc	Gsdmc1|Mlze	gasdermin C	protein-coding
1021-2	chr12	72800694	72801713	+	598	Intergenic	RSINE1|SINE|B4	39992	NM_008910	19042	Mm.261045	NM_008910	ENSMUSG00000021096	Ppm1a	2310003C21Rik|2900017D14Rik|AI427932|AU017636|MMPa-2|MPPa-1	protein phosphatase 1A, magnesium dependent, alpha isoform	protein-coding
908-5	chr7	113985600	113986506	+	598	intron (NM_145584, intron 6 of 15)	intron (NM_145584, intron 6 of 15)	131728	NM_025846	66922	Mm.276572	NM_025846	ENSMUSG00000055723	Rras2	2610016H24Rik|C86394|TC21	related RAS viral (r-ras) oncogene 2	protein-coding
1440	chr15	66968996	66970434	+	598	promoter-TSS (NM_008681)	promoter-TSS (NM_008681)	-74	NM_008681	17988	Mm.30837	NM_008681	ENSMUSG00000005125	Ndrg1	CAP43|CMT4D|DRG1|HMSNL|NMSL|Ndr1|Ndrl|PROXY1|RTP|TDD5	N-myc downstream regulated gene 1	protein-coding
1057-2	chr10	71372878	71373933	+	598	intron (NM_027184, intron 4 of 5)	B2_Mm1t|SINE|B2	25642	NM_001347191	69718	Mm.245867	NM_027184	ENSMUSG00000060733	Ipmk	2410017C19Rik|AA408208|Impk	inositol polyphosphate multikinase	protein-coding
1100-9	chr7	80773502	80774600	+	598	intron (NM_016721, intron 2 of 37)	intron (NM_016721, intron 2 of 37)	29280	NM_016721	29875	Mm.207619	NM_016721	ENSMUSG00000030536	Iqgap1	AA682088|D7Ertd237e|D7Ertd257e|mKIAA0051	IQ motif containing GTPase activating protein 1	protein-coding
1287-2	chr11	120490799	120492084	+	598	promoter-TSS (NM_013770)	promoter-TSS (NM_013770)	-396	NM_013770	27376	Mm.3991	NM_013770	ENSMUSG00000025792	Slc25a10	Dic	solute carrier family 25 (mitochondrial carrier, dicarboxylate transporter), member 10	protein-coding
959-7	chr5	137538907	137539864	+	597	Intergenic	B4A|SINE|B4	-6079	NM_010312	14693	Mm.30141	NM_010312	ENSMUSG00000029713	Gnb2	Gnb-2	guanine nucleotide binding protein (G protein), beta 2	protein-coding
1182-5	chr2	101742029	101743209	+	597	intron (NM_001355625, intron 5 of 8)	intron (NM_001355625, intron 5 of 8)	55088	NM_175181	72446	Mm.24138	NM_175181	ENSMUSG00000032841	Prr5l	2600010E01Rik|4833411O04Rik|Protor-2|Protor2	proline rich 5 like	protein-coding
1218-3	chr13	73770069	73771285	+	597	intron (NM_001360694, intron 1 of 24)	intron (NM_001360694, intron 1 of 24)	6980	NM_011390	20499	Mm.275800	NM_011390	ENSMUSG00000017756	Slc12a7	AA408796|D13Ertd261e|Kcc4	solute carrier family 12, member 7	protein-coding
983-8	chrX	73678066	73679047	+	597	intron (NM_001142810, intron 4 of 12)	intron (NM_001142810, intron 4 of 12)	5423	NM_001142809	102857	Mm.274553	NM_133987	ENSMUSG00000019558	Slc6a8	AA589632|CRT|CRTR|CT1|CTR5|Creat	solute carrier family 6 (neurotransmitter transporter, creatine), member 8	protein-coding
1041	chr1	26059847	26060886	+	597	Intergenic	L1_Mus3|LINE|L1	-230659	NM_175642	210933	Mm.336569	NM_175642	ENSMUSG00000033569	Adgrb3	A830096D10Rik|Bai3	adhesion G protein-coupled receptor B3	protein-coding
1496-2	chr2	30823044	30824538	+	597	TTS (NM_001356434)	TTS (NM_001356434)	4509	NM_133346	72323	Mm.27656	NM_133346	ENSMUSG00000039483	Asb6	2510004M11Rik|AA409356	ankyrin repeat and SOCS box-containing 6	protein-coding
1218	chr1	25356920	25358136	+	597	intron (NM_175642, intron 16 of 30)	L1MB1|LINE|L1	-79574	NM_001204913	100504323	Mm.484176	NM_001204913		Gm20172	-	predicted gene, 20172	protein-coding
1187-4	chr14	9569667	9570852	+	597	intron (NM_001308286, intron 6 of 6)	L1_Mus3|LINE|L1	-313836	NR_030680	100042415	Mm.235938	NR_030680	ENSMUSG00000089686	Mnd1-ps	Gm3833	Mnd1 retrotransposed pseudogene	pseudo
1148-2	chr15	25395765	25396911	+	597	intron (NM_027395, intron 1 of 1)	intron (NM_027395, intron 1 of 1)	17426	NM_027395	70350	Mm.29586	NM_027395	ENSMUSG00000045763	Basp1	2610024P12Rik|CAP-23|CAP23|Ckap3|NAP-22|NAP22	brain abundant, membrane attached signal protein 1	protein-coding
1036-2	chr17	25727740	25728774	+	597	promoter-TSS (NM_145409)	promoter-TSS (NM_145409)	540	NM_028009	106707	Mm.24603	NM_028009	ENSMUSG00000041199	Rpusd1	2310051D06Rik|AU019540|Rlucl	RNA pseudouridylate synthase domain containing 1	protein-coding
1466-2	chr17	46850202	46851666	+	596	Intergenic	Intergenic	-19521	NM_001100452	210982	Mm.37642	NM_001100452	ENSMUSG00000036568	Bicral	Gltscr1l|mKIAA0240	BRD4 interacting chromatin remodeling complex associated protein like	protein-coding
1307-4	chr17	24414230	24415535	+	596	promoter-TSS (NR_033554)	promoter-TSS (NR_033554)	207	NM_009070	19826	Mm.1951	NM_009070	ENSMUSG00000034681	Rnps1	-	ribonucleic acid binding protein S1	protein-coding
908-3	chr2	156612626	156613532	+	596	promoter-TSS (NM_146128)	promoter-TSS (NM_146128)	343	NR_040372	100504350	Mm.94426	NR_040372	ENSMUSG00000086118	Gm14169	-	predicted gene 14169	ncRNA
1022	chr18	57085037	57086057	+	596	Intergenic	Intergenic	-47543	NM_001001979	70417	Mm.297863	NM_001001979	ENSMUSG00000024593	Megf10	3000002B06Rik|Gm331	multiple EGF-like-domains 10	protein-coding
1082-5	chr8	123609788	123610868	+	596	Intergenic	Intergenic	-43601	NM_133955	69581	Mm.168257	NM_133955	ENSMUSG00000039960	Rhou	2310026M05Rik|AI182090|Arhu|CDC42L1|G28K|WRCH-1|WRCH1|mG28K	ras homolog family member U	protein-coding
1483	chr1	177796206	177797687	+	596	promoter-TSS (NM_007422)	promoter-TSS (NM_007422)	-437	NM_007422	11566	Mm.338021	NM_007422	ENSMUSG00000015961	Adss	AI314886|AS|Adss2	adenylosuccinate synthetase, non muscle	protein-coding
1250-3	chr19	53421312	53422560	+	596	Intergenic	Intergenic	-31302	NM_172429	76479	Mm.313687	NM_172429	ENSMUSG00000025024	Smndc1	-	survival motor neuron domain containing 1	protein-coding
1184-2	chr11	117978943	117980125	+	595	Intergenic	Intergenic	-7323	NM_133757	74451	Mm.28864	NM_133757	ENSMUSG00000017715	Pgs1	2610019F11Rik|4933424M23Rik|SAF	phosphatidylglycerophosphate synthase 1	protein-coding
1160-2	chr11	105153414	105154572	+	595	Intergenic	Intergenic	-24814	NM_001294331	24086	Mm.126976	NM_011903	ENSMUSG00000020694	Tlk2	4933403M19Rik|PKU-alpha|PKUalpha|Tlk	tousled-like kinase 2 (Arabidopsis)	protein-coding
1183-9	chr5	98030253	98031434	+	595	5' UTR (NM_133738, exon 1 of 17)	5' UTR (NM_133738, exon 1 of 17)	174	NM_133738	71914	Mm.24842	NM_133738	ENSMUSG00000029338	Antxr2	2310046B19Rik|AW561899|CMG-2|CMG2|cI-35	anthrax toxin receptor 2	protein-coding
1242-2	chr19	57403532	57404772	+	595	Intergenic	B2_Mm1a|SINE|B2	43143	NM_145505	226252	Mm.358870	NM_145505	ENSMUSG00000033478	Fam160b1	AI450540|mKIAA1600	family with sequence similarity 160, member B1	protein-coding
974-2	chr19	40644774	40645746	+	595	intron (NM_001304721, intron 1 of 9)	intron (NM_001304721, intron 1 of 9)	-14510	NM_009848	12495	Mm.2824	NM_009848	ENSMUSG00000048120	Entpd1	2610206B08Rik|AA408691|Cd39|E130009M23Rik|NTPDase-1	ectonucleoside triphosphate diphosphohydrolase 1	protein-coding
932-3	chr15	79022517	79023447	+	595	intron (NR_155267, intron 1 of 1)	intron (NR_155267, intron 1 of 1)	547	NR_155268	654469	Mm.395054	NR_155267		Gm17753	-	predicted gene, 17753	ncRNA
1211-4	chr5	135950720	135951929	+	594	Intergenic	Intergenic	-16683	NM_018871	22628	Mm.233813	NM_018871	ENSMUSG00000051391	Ywhag	14-3-3gamma|D7Bwg1348e	tyrosine 3-monooxygenase/tryptophan 5-monooxygenase activation protein, gamma polypeptide	protein-coding
1275-3	chr10	59898946	59900219	+	594	Intergenic	Intergenic	19991	NM_019965	56709	Mm.103610	NM_019965	ENSMUSG00000020109	Dnajb12	Dj10|mDj10	DnaJ heat shock protein family (Hsp40) member B12	protein-coding
1105-3	chr13	48580112	48581215	+	594	intron (NM_207232, intron 9 of 9)	intron (NM_207232, intron 9 of 9)	-42391	NR_029725	387244		NR_029725	ENSMUSG00000065421	Mirlet7a-1	Let-7a|Mirnlet7a|Mirnlet7a-1|let-7a-1	microRNA let7a-1	ncRNA
1240-7	chr8	124354485	124355723	+	594	Intergenic	RMER1B|Other|Other	78832	NM_171824	209966	Mm.234233	NM_171824	ENSMUSG00000050751	Pgbd5	2900019M05Rik|AI854313	piggyBac transposable element derived 5	protein-coding
1248-7	chr5	88553518	88554764	+	594	promoter-TSS (NM_023054)	promoter-TSS (NM_023054)	-321	NM_023054	65961	Mm.490364	NM_023054	ENSMUSG00000070697	Utp3	2400011K09Rik|AW557551|C87704|Crl-1|Crl1|Crlz1|Sas10	UTP3 small subunit processome component	protein-coding
1170-5	chr2	145860153	145861321	+	594	exon (NM_028724, exon 9 of 13)	exon (NM_028724, exon 9 of 13)	-42504	NM_026425	67877	Mm.151168	NM_026425	ENSMUSG00000002728	Naa20	1500004D14Rik|2900026I01Rik|AU041458|D2Ertd186e|Nat5	N(alpha)-acetyltransferase 20, NatB catalytic subunit	protein-coding
1934	chr10	75831673	75833605	+	594	intron (NM_010361, intron 3 of 4)	intron (NM_010361, intron 3 of 4)	2242	NM_010361	14872	Mm.24118	NM_010361	ENSMUSG00000033318	Gstt2	AI266894|Yrs|mGSTT2	glutathione S-transferase, theta 2	protein-coding
1120-4	chr12	85519164	85520282	+	593	Intergenic	Intergenic	45833	NM_010234	14281	Mm.246513	NM_010234	ENSMUSG00000021250	Fos	D12Rfj1|c-fos|cFos	FBJ osteosarcoma oncogene	protein-coding
954-3	chr19	41846424	41847376	+	593	3' UTR (NM_177603, exon 1 of 1)	3' UTR (NM_177603, exon 1 of 1)	1232	NM_177603	212398	Mm.222723	NM_177603	ENSMUSG00000047604	Frat2	-	frequently rearranged in advanced T cell lymphomas 2	protein-coding
979-3	chr15	101331366	101332343	+	593	Intergenic	Intergenic	-37498	NR_035462	100316694		NR_035462	ENSMUSG00000088459	Mir1941	mmu-mir-1941	microRNA 1941	ncRNA
1281	chr2	118813442	118814721	+	593	promoter-TSS (NM_026412)	promoter-TSS (NM_026412)	78	NM_026412	51944	Mm.252695	NM_026412	ENSMUSG00000027331	Knstrn	1700025D04Rik|C15orf23|D2Ertd750e|SKAP|Traf4af1	kinetochore-localized astrin/SPAG5 binding	protein-coding
1154-8	chrX	32092028	32093180	+	593	Intergenic	Intergenic	130560	NM_001270685	100862314	Mm.431329	NM_001270685	ENSMUSG00000095770	Gm21637	-	predicted gene, 21637	protein-coding
1516	chr10	126225263	126226777	+	593	Intergenic	(TTG)n|Simple_repeat|Simple_repeat	259801	NM_177152	320398	Mm.275586	NM_177152	ENSMUSG00000020105	Lrig3	9030421L11Rik|9130004I02Rik|9430095K15Rik|mKIAA3016	leucine-rich repeats and immunoglobulin-like domains 3	protein-coding
1197-3	chr2	37430210	37431405	+	592	intron (NM_146253, intron 1 of 1)	CpG	112	NM_146253	241322	Mm.330182	NM_146253	ENSMUSG00000066798	Zbtb6	A830092L04Rik|ZID|Zfp482	zinc finger and BTB domain containing 6	protein-coding
1284	chr10	128934260	128935542	+	592	intron (NM_001330160, intron 1 of 24)	intron (NM_001330160, intron 1 of 24)	1088	NM_001330160	16404	Mm.179747	NM_008398	ENSMUSG00000025348	Itga7	[a]7|alpha7	integrin alpha 7	protein-coding
979	chr10	71363109	71364086	+	592	intron (NM_027184, intron 2 of 5)	intron (NM_027184, intron 2 of 5)	15834	NM_001347191	69718	Mm.245867	NM_027184	ENSMUSG00000060733	Ipmk	2410017C19Rik|AA408208|Impk	inositol polyphosphate multikinase	protein-coding
998-4	chr19	7235641	7236637	+	592	intron (NM_027643, intron 1 of 7)	intron (NM_027643, intron 1 of 7)	5083	NM_027643	70999	Mm.329605	NM_027643	ENSMUSG00000024764	Naa40	4931433E08Rik|AU023197|Nat11|NatD	N(alpha)-acetyltransferase 40, NatD catalytic subunit	protein-coding
1105-7	chr15	76189383	76190486	+	592	intron (NM_201385, intron 12 of 31)	intron (NM_201385, intron 12 of 31)	5776	NM_201394	18810	Mm.234912	NM_011117	ENSMUSG00000022565	Plec	AA591047|AU042537|EBS1|PCN|PLTN|Plec1	plectin	protein-coding
1119-2	chr16	34911645	34912762	+	592	exon (NM_139300, exon 12 of 32)	exon (NM_139300, exon 12 of 32)	27126	NR_040536	76649	Mm.420532	NR_040536	ENSMUSG00000100593	1700119H24Rik	-	RIKEN cDNA 1700119H24 gene	ncRNA
1053-8	chr6	29985570	29986621	+	591	intron (NR_040264, intron 1 of 1)	intron (NR_040264, intron 1 of 1)	766	NR_040263	76419	Mm.84522	NR_040263	ENSMUSG00000045709	Smkr-ps	1700023L04Rik	smal lysine rich protein 1, pseudogene	ncRNA
1142-6	chr6	71758225	71759365	+	591	intron (NM_178608, intron 2 of 6)	Lx5c|LINE|L1	51114	NM_178608	52250	Mm.146332	NM_178608	ENSMUSG00000052852	Reep1	D6Ertd253e	receptor accessory protein 1	protein-coding
842-2	chr14	100951234	100952074	+	591	Intergenic	RMER4B|LTR|ERVK	248415	NM_029680	76627	Mm.31415	NM_029680	ENSMUSG00000042888	Prr30	1700110M21Rik	proline rich 30	protein-coding
1128-8	chr7	100158737	100159863	+	591	promoter-TSS (NM_026010)	promoter-TSS (NM_026010)	23	NM_026010	67164	Mm.46777	NM_026010	ENSMUSG00000030725	Lipt2	2610209A20Rik	lipoyl(octanoyl) transferase 2 (putative)	protein-coding
1060-4	chr3	144988624	144989682	+	590	Intergenic	Intergenic	-14108	NM_207208	99663	Mm.442050	NM_207208	ENSMUSG00000068547	Clca4a	9130020L07Rik|AI504701|Clca4|Clca6	chloride channel accessory 4A	protein-coding
1227-2	chr11	120269053	120270278	+	590	intron (NM_198423, intron 4 of 27)	intron (NM_198423, intron 4 of 27)	36718	NM_198423	268515	Mm.309498	NM_198423	ENSMUSG00000039741	Bahcc1	B930044J06|BC060615	BAH domain and coiled-coil containing 1	protein-coding
995	chr14	45364985	45365978	+	590	intron (NM_019637, intron 4 of 10)	RMER17B|LTR|ERVK	14295	NM_019637	56291	Mm.202561	NM_019637	ENSMUSG00000053205	Styx	0610039A20Rik|hStyxb	serine/threonine/tyrosine interaction protein	protein-coding
1201-7	chr8	104247675	104248874	+	590	intron (NR_045642, intron 1 of 8)	intron (NR_045642, intron 1 of 8)	284	NR_045642	57813	Mm.183110	NM_021028	ENSMUSG00000035824	Tk2	AU024611|mt-TK	thymidine kinase 2, mitochondrial	protein-coding
1330-2	chr16	48993654	48994982	+	590	promoter-TSS (NM_027341)	promoter-TSS (NM_027341)	130	NM_172616	224171	Mm.24491	NM_172616	ENSMUSG00000033031	Cip2a	AA408511|AU018569|C330027C09Rik|Kiaa1524	cell proliferation regulating inhibitor of protein phosphatase 2A	protein-coding
838-5	chr7	66450044	66450880	+	590	Intergenic	Intergenic	-22985	NM_053080	56847	Mm.140988	NM_053080	ENSMUSG00000015134	Aldh1a3	ALDH6|RALDH3|V1	aldehyde dehydrogenase family 1, subfamily A3	protein-coding
1270-5	chr9	67048868	67050136	+	590	promoter-TSS (NM_001164251)	promoter-TSS (NM_001164251)	-289	NM_001164251	22003	Mm.121878	NM_024427	ENSMUSG00000032366	Tpm1	AA986836|AI854628|TM2|TPM1kappa|Tm3|Tmpa|Tpm-1|alpha-TM	tropomyosin 1, alpha	protein-coding
1130-5	chr8	61732997	61734125	+	590	intron (NM_001293772, intron 2 of 21)	intron (NM_001293772, intron 2 of 21)	26528	NM_001293773	72333	Mm.29933	NM_001081390	ENSMUSG00000058056	Palld	2410003B16Rik|6030492A02	palladin, cytoskeletal associated protein	protein-coding
926-2	chr12	87295388	87296312	+	590	intron (NM_001290302, intron 1 of 5)	intron (NM_001290302, intron 1 of 5)	3855	NM_001290302	217738	Mm.219363	NM_001290302	ENSMUSG00000050671	Ism2	Gm264|Thsd3	isthmin 2	protein-coding
1154-3	chr12	40222021	40223173	+	590	promoter-TSS (NR_045157)	promoter-TSS (NR_045157)	214	NR_035459	100316693		NR_035459	ENSMUSG00000089371	Mir1938	mir-1938|mmu-mir-1938	microRNA 1938	ncRNA
1184	chr11	102777100	102778282	+	590	3' UTR (NM_001110778, exon 26 of 26)	3' UTR (NM_001110778, exon 26 of 26)	16256	NM_001110778	11488	Mm.89854	NM_009613	ENSMUSG00000020926	Adam11	AW060611|Mdc	a disintegrin and metallopeptidase domain 11	protein-coding
847	chr14	14520100	14520945	+	590	Intergenic	Intergenic	174027	NM_008369	16188	Mm.425857	NM_008369	ENSMUSG00000068758	Il3ra	CD123|CDw123|SUT-1	interleukin 3 receptor, alpha chain	protein-coding
1086-7	chr3	104618177	104619261	+	590	Intergenic	Intergenic	-19945	NM_009196	20501	Mm.9086	NM_009196	ENSMUSG00000032902	Slc16a1	AL022710|Mct1	solute carrier family 16 (monocarboxylic acid transporters), member 1	protein-coding
1006-5	chr19	53534464	53535468	+	590	intron (NM_001085390, intron 2 of 3)	intron (NM_001085390, intron 2 of 3)	5821	NM_001085390	240672	Mm.482424	NM_001085390	ENSMUSG00000034765	Dusp5	Gm337	dual specificity phosphatase 5	protein-coding
969-3	chr2	32628925	32629892	+	590	promoter-TSS (NM_021515)	promoter-TSS (NM_021515)	-92	NM_021515	11636	Mm.29189	NM_021515	ENSMUSG00000026817	Ak1	Ak-1|B430205N08Rik	adenylate kinase 1	protein-coding
1250	chr11	4134920	4136168	+	589	exon (NM_001363143, exon 1 of 7)	exon (NM_001363143, exon 1 of 7)	384	NM_027859	71673	Mm.240586	NM_027859	ENSMUSG00000003581	Rnf215	0610009J22Rik|AW557025|C77903	ring finger protein 215	protein-coding
1158-8	chr8	119440236	119441392	+	589	intron (NR_157155, intron 1 of 5)	intron (NR_157155, intron 1 of 5)	3667	NR_157155	71839	Mm.272357	NM_027950	ENSMUSG00000074063	Osgin1	1700012B18Rik|Okl38	oxidative stress induced growth inhibitor 1	protein-coding
875	chr11	53764382	53765255	+	589	Intergenic	Intergenic	-1164	NR_106131	102465772		NR_106131	ENSMUSG00000099153	Mir7671	Gm27802|mmu-mir-7671	microRNA 7671	ncRNA
1447	chr6	22216104	22217549	+	589	intron (NM_001081351, intron 16 of 21)	intron (NM_001081351, intron 16 of 21)	-71401	NM_053116	93735	Mm.137403	NM_053116	ENSMUSG00000029671	Wnt16	E130309I19Rik	wingless-type MMTV integration site family, member 16	protein-coding
1169-9	chr5	103869308	103870475	+	589	intron (NM_178741, intron 6 of 9)	RSINE1|SINE|B4	41368	NM_001359987	246293	Mm.179871	NM_178741	ENSMUSG00000029312	Klhl8	2310001P09Rik|D5Ertd431e	kelch-like 8	protein-coding
1440-4	chr5	143668857	143670295	+	589	intron (NM_001163548, intron 1 of 12)	B4A|SINE|B4	18335	NM_001163548	19159	Mm.281003	NM_011182	ENSMUSG00000018001	Cyth3	AI648983|ARNO3|CLM3|Grp1|Pscd3	cytohesin 3	protein-coding
1334	chr13	52062232	52063564	+	589	Intergenic	Lx8b|LINE|L1	-33843	NR_045061	74050	Mm.84860	NR_045061	ENSMUSG00000113211	4921525O09Rik	-	RIKEN cDNA 4921525O09 gene	ncRNA
938	chr16	94237717	94238653	+	589	intron (NM_139145, intron 5 of 10)	intron (NM_139145, intron 5 of 10)	52106	NM_001360045	110948	Mm.30921	NM_139145	ENSMUSG00000040820	Hlcs	410I21.SP6|D16Jhu34	holocarboxylase synthetase (biotin- [propriony-Coenzyme A-carboxylase (ATP-hydrolysing)] ligase)	protein-coding
1058-3	chr13	54811213	54812269	+	589	Intergenic	Intergenic	22336	NM_028841	74257	Mm.32883	NM_028841	ENSMUSG00000025875	Tspan17	2210021G21Rik|AI047581|Fbxo23|Tm4sf17	tetraspanin 17	protein-coding
895-3	chr19	26630476	26631369	+	589	exon (NM_011416, exon 4 of 33)	exon (NM_011416, exon 4 of 33)	25762	NM_011416	67155	Mm.491146	NM_011416	ENSMUSG00000024921	Smarca2	2610209L14Rik|SNF2alpha|Snf2l2|brahma|brm	SWI/SNF related, matrix associated, actin dependent regulator of chromatin, subfamily a, member 2	protein-coding
1043	chr14	67119283	67120324	+	589	Intergenic	Intergenic	-47332	NM_001205188	71978	Mm.273997	NM_028032	ENSMUSG00000022052	Ppp2r2a	2410004D02Rik|mKIAA1541	protein phosphatase 2, regulatory subunit B, alpha	protein-coding
1061-3	chr17	28256154	28257213	+	588	intron (NM_011145, intron 2 of 7)	intron (NM_011145, intron 2 of 7)	-15025	NR_045427	69050	Mm.486938	NR_045427	ENSMUSG00000002250	1810013A23Rik	-	RIKEN cDNA 1810013A23 gene	ncRNA
945-3	chr16	34484458	34485401	+	588	intron (NM_177357, intron 1 of 59)	intron (NM_177357, intron 1 of 59)	29098	NM_001164268	545156	Mm.82274	NM_177357	ENSMUSG00000061751	Kalrn	2210407G14Rik|AV235988|DUET|E530005C20Rik|Gm539|Hapip|TRAD	kalirin, RhoGEF kinase	protein-coding
1171-5	chr8	125131726	125132895	+	588	intron (NM_174853, intron 5 of 11)	intron (NM_174853, intron 5 of 11)	78115	NM_174854	244667	Mm.233504	NM_170596	ENSMUSG00000043051	Disc1	-	disrupted in schizophrenia 1	protein-coding
1266-4	chr7	133578987	133580251	+	588	Intergenic	Intergenic	22496	NM_028654	73808	Mm.159067	NM_028654	ENSMUSG00000030976	Tex36	4930404H21Rik	testis expressed 36	protein-coding
1082-3	chr5	125052321	125053401	+	588	intron (NM_001253904, intron 18 of 47)	L2a|LINE|L2	49413	NM_028443	73121	Mm.296138	NM_028443	ENSMUSG00000037962	Rflna	3110032G18Rik|Fam101a|cfm|cfm2	refilin A	protein-coding
1084-2	chr18	83644368	83645450	+	588	Intergenic	Intergenic	-319025	NR_045361	70960	Mm.410834	NR_045361	ENSMUSG00000118333	4921531P14Rik	1700108N05Rik	RIKEN cDNA 4921531P14 gene	ncRNA
1197-2	chr17	87313869	87315064	+	588	intron (NM_028639, intron 5 of 19)	intron (NM_028639, intron 5 of 19)	31580	NM_028639	225049	Mm.77396	NM_028639	ENSMUSG00000036918	Ttc7	1110035E02Rik|1700007L07Rik|Ttc7a|fsn|hea	tetratricopeptide repeat domain 7	protein-coding
966-4	chr2	170404431	170405395	+	588	intron (NM_001164369, intron 4 of 11)	intron (NM_001164369, intron 4 of 11)	22932	NM_001164369	76960	Mm.240850	NM_029815	ENSMUSG00000013523	Bcas1	2210416M21Rik|9030223A09Rik|AI841227|NABC1	breast carcinoma amplified sequence 1	protein-coding
1091-8	chr17	21473884	21474973	+	587	Intergenic	Intergenic	-14560	NM_013843	24132	Mm.42140	NM_013843	ENSMUSG00000057409	Zfp53	D030067O06Rik|KRAZ1|Zfp-53|Zfp118|zfas8	zinc finger protein 53	protein-coding
976-4	chr2	73005722	73006696	+	587	Intergenic	Intergenic	-25763	NM_001018042	20687	Mm.124328	NM_011450	ENSMUSG00000027109	Sp3	D130027J01Rik	trans-acting transcription factor 3	protein-coding
1228	chr11	68796359	68797585	+	587	intron (NM_175260, intron 26 of 40)	intron (NM_175260, intron 26 of 40)	56163	NM_023668	83431	Mm.31979	NM_023668	ENSMUSG00000018736	Ndel1	2600006O07Rik|MITAP1|NUDEL|mNudE-L|mNudel	nudE neurodevelopment protein 1 like 1	protein-coding
1157-2	chr10	76260322	76261477	+	587	3' UTR (NM_009115, exon 3 of 3)	3' UTR (NM_009115, exon 3 of 3)	7063	NM_009115	20203	Mm.235998	NM_009115	ENSMUSG00000033208	S100b	AI850290|Bpb	S100 protein, beta polypeptide, neural	protein-coding
1143-2	chr14	100209199	100210340	+	587	Intergenic	Intergenic	-59973	NM_010636	16597	Mm.396499	NM_010636	ENSMUSG00000072294	Klf12	2700063E05Rik|AI225908|AI315654|AP-2rep|B130052C06Rik|D530033K05Rik	Kruppel-like factor 12	protein-coding
1230-4	chr3	152332345	152333573	+	586	intron (NM_001162375, intron 4 of 13)	intron (NM_001162375, intron 4 of 13)	7448	NM_174868	215708	Mm.135018	NM_174868	ENSMUSG00000054942	Miga1	A930038D06|AI852168|C030011O14Rik|Fam73a|Mita1	mitoguardin 1	protein-coding
1301	chr18	34650920	34652219	+	586	exon (NM_178347, exon 1 of 16)	exon (NM_178347, exon 1 of 16)	167	NM_178347	52563	Mm.196638	NM_178347	ENSMUSG00000024370	Cdc23	6030435O18|D18Ertd243e	CDC23 cell division cycle 23	protein-coding
1124	chr1	88072224	88073346	+	586	intron (NM_201644, intron 1 of 4)	intron (NM_201644, intron 1 of 4)	2006	NM_201644	394434	Mm.300095	NM_201644	ENSMUSG00000090175	Ugt1a9	UDPGT|UDPGT 1-9|UGT1-09|UGT1.9|UGTP4|Ugt1a12|mUGTBr/P	UDP glucuronosyltransferase 1 family, polypeptide A9	protein-coding
943-5	chr7	73085056	73085997	+	586	Intergenic	Intergenic	16542	NR_046024	625243	Mm.261798	NR_046024	ENSMUSG00000108383	Gm6567	-	predicted gene 6567	ncRNA
1158-4	chr17	24644952	24646108	+	585	promoter-TSS (NM_023449)	promoter-TSS (NM_023449)	-573	NM_023449	65962	Mm.21587	NM_023055	ENSMUSG00000002504	Slc9a3r2	0610011L07Rik|1200011K07Rik|2010007A20Rik|E3karp|NHERF-2|Nherf2|Octs2|Sip-1|Sip1|Sryip1|Tka-1	solute carrier family 9 (sodium/hydrogen exchanger), member 3 regulator 2	protein-coding
1165	chr1	91874533	91875696	+	585	Intergenic	Intergenic	73653	NM_007855	13345	Mm.9474	NM_007855	ENSMUSG00000007805	Twist2	Dermo1|bHLHa39	twist basic helix-loop-helix transcription factor 2	protein-coding
1134-4	chr13	55592497	55593629	+	585	promoter-TSS (NM_026211)	promoter-TSS (NM_026211)	-72	NM_026211	67511	Mm.45233	NM_026211	ENSMUSG00000058569	Tmed9	2400003B06Rik	transmembrane p24 trafficking protein 9	protein-coding
1226-4	chr5	124578646	124579870	+	585	promoter-TSS (NM_145371)	promoter-TSS (NM_145371)	110	NM_181410	209357	Mm.185467	NM_181410	ENSMUSG00000029387	Gtf2h3	34kDa|5033417D07Rik|BTF2|BTF2 p34|C730029A10|D5Ertd679e|TFIIH	general transcription factor IIH, polypeptide 3	protein-coding
1150	chr19	46126934	46128082	+	585	Intergenic	Intergenic	-4391	NM_007703	12686	Mm.21806	NM_007703	ENSMUSG00000038754	Elovl3	CIN-2|Cig30	elongation of very long chain fatty acids (FEN1/Elo2, SUR4/Elo3, yeast)-like 3	protein-coding
1093-2	chr4	141711646	141712737	+	585	intron (NM_001017966, intron 2 of 9)	B3|SINE|B2	11228	NM_001017966	68817	Mm.393721	NM_001017966	ENSMUSG00000078515	Ddi2	1110056G13Rik|1700027M01Rik|9130022E05Rik|AI604911|AU040698	DNA-damage inducible protein 2	protein-coding
1174-7	chr8	84004026	84005198	+	585	exon (NM_183097, exon 6 of 6)	exon (NM_183097, exon 6 of 6)	-1016	NR_106191	102466886		NR_106191	ENSMUSG00000098823	Mir8111	Gm27823|mmu-mir-8111	microRNA 8111	ncRNA
1315-4	chrX	106186355	106187668	+	585	promoter-TSS (NM_008828)	promoter-TSS (NM_008828)	-89	NM_008828	18655	Mm.316355	NM_008828	ENSMUSG00000062070	Pgk1	Pgk-1	phosphoglycerate kinase 1	protein-coding
1100-5	chr18	77963965	77965063	+	585	intron (NM_001195633, intron 11 of 43)	intron (NM_001195633, intron 11 of 43)	26048	NM_001195633	100502841	Mm.297782	NM_001195633	ENSMUSG00000039840	Epg5	4732475F16|5430411K18Rik|AI661957|AW456499	ectopic P-granules autophagy protein 5 homolog (C. elegans)	protein-coding
1157-6	chr2	32874819	32875974	+	585	promoter-TSS (NM_146119)	promoter-TSS (NM_146119)	-738	NM_146119	227737	Mm.301646	NM_146119	ENSMUSG00000026796	Fam129b	9130404D14Rik	family with sequence similarity 129, member B	protein-coding
934-4	chr12	111733227	111734159	+	584	exon (NM_026511, exon 5 of 5)	exon (NM_026511, exon 5 of 5)	20424	NM_026511	68020	Mm.425762	NM_026511	ENSMUSG00000037787	Apopt1	1700081D05Rik|2810002N01Rik|Apop-1|Apop1	apoptogenic, mitochondrial 1	protein-coding
998-5	chr3	12455714	12456710	+	584	Intergenic	RMER2|LTR|ERV1	-611853	NR_040751	100038545	Mm.388494	NR_040751	ENSMUSG00000104015	Gm10745	-	predicted gene 10745	ncRNA
1364-2	chr19	17167398	17168760	+	584	intron (NM_181348, intron 9 of 19)	intron (NM_181348, intron 9 of 19)	171426	NM_001136484	14537	Mm.244825	NM_010265	ENSMUSG00000038843	Gcnt1	5630400D21Rik|B130048E03|C2 GlcNAcT|C2GNT|IGnT	glucosaminyl (N-acetyl) transferase 1, core 2	protein-coding
1048	chr11	88550646	88551692	+	584	intron (NM_054043, intron 6 of 13)	intron (NM_054043, intron 6 of 13)	-68082	NR_131025	68397	Mm.426889	NR_131025		0610039H22Rik	-	RIKEN cDNA 0610039H22 gene	ncRNA
1040-3	chr13	56670567	56671605	+	584	Intergenic	(CCCTAA)n|Simple_repeat|Simple_repeat	-31924	NM_008541	17129	Mm.272920	NM_008541	ENSMUSG00000021540	Smad5	1110051M15Rik|AI451355|Dwf-C|Madh5|MusMLP	SMAD family member 5	protein-coding
1129-4	chr16	30563806	30564933	+	584	intron (NM_178069, intron 13 of 13)	B3A|SINE|B2	-13791	NM_001357415	224090	Mm.241459	NM_172614	ENSMUSG00000022537	Tmem44	1700007N03Rik|9330161C17Rik|B230220N21	transmembrane protein 44	protein-coding
1201-5	chr6	53722718	53723917	+	584	Intergenic	Intergenic	97508	NM_025817	66873	Mm.422727	NM_025817	ENSMUSG00000043496	Tril	1200009O22Rik|AI316813|mKIAA0644	TLR4 interactor with leucine-rich repeats	protein-coding
1254-2	chr16	34425473	34426725	+	584	intron (NM_177357, intron 1 of 59)	LTR40a|LTR|ERVL	87928	NM_001164268	545156	Mm.82274	NM_177357	ENSMUSG00000061751	Kalrn	2210407G14Rik|AV235988|DUET|E530005C20Rik|Gm539|Hapip|TRAD	kalirin, RhoGEF kinase	protein-coding
1308	chr2	25549102	25550408	+	584	Intergenic	Intergenic	-2815	NM_009422	22030	Mm.3399	NM_009422	ENSMUSG00000026942	Traf2	AI325259	TNF receptor-associated factor 2	protein-coding
962-4	chr17	9843521	9844481	+	584	Intergenic	Intergenic	-68135	NR_045433	71092	Mm.243827	NR_045433	ENSMUSG00000117264	4930452A19Rik	4933424P20Rik	RIKEN cDNA 4930452A19 gene	ncRNA
1161	chr14	25871967	25873126	+	583	exon (NM_013469, exon 4 of 15)	exon (NM_013469, exon 4 of 15)	30347	NM_207229	211623	Mm.439926	NM_207229	ENSMUSG00000095304	Plac9a	Plac9	placenta specific 9a	protein-coding
1193-2	chr12	54403656	54404847	+	583	Intergenic	Lx8|LINE|L1	-12933	NR_033689	665239	Mm.26856	NR_033689		Gm7550	EG665239|Gm666	predicted gene 7550	ncRNA
1290-2	chr10	97957571	97958859	+	583	intron (NR_033537, intron 1 of 4)	intron (NR_033537, intron 1 of 4)	8875	NR_033537	100038699	Mm.467933	NR_033537	ENSMUSG00000074776	Gm10754	-	predicted gene 10754	ncRNA
1061-2	chr12	84723026	84724085	+	583	Intergenic	PB1D10|SINE|Alu	-24748	NM_001033334	627191	Mm.152484	NM_001033334	ENSMUSG00000071234	Syndig1l	DSPC1|Gm261|SynDIG2|Tmem90a	synapse differentiation inducing 1 like	protein-coding
955-4	chr8	12887081	12888034	+	583	intron (NM_001371043, intron 2 of 29)	intron (NM_001371043, intron 2 of 29)	13751	NM_001371043
1199	chr11	70646373	70647570	+	583	promoter-TSS (NM_001316728)	promoter-TSS (NM_001316728)	68	NM_024211	67863	Mm.296082	NM_024211	ENSMUSG00000014606	Slc25a11	2310022P18Rik|2oxoc	solute carrier family 25 (mitochondrial carrier oxoglutarate carrier), member 11	protein-coding
1290-3	chr11	50209583	50210871	+	583	intron (NM_001290769, intron 1 of 7)	intron (NM_001290769, intron 1 of 7)	593	NM_001290769	18412	Mm.40828	NM_011018	ENSMUSG00000015837	Sqstm1	A170|OSF-6|Osi|STAP|STONE14|p62	sequestosome 1	protein-coding
1259-7	chr8	83441981	83443238	+	583	promoter-TSS (NM_019708)	promoter-TSS (NM_019708)	53	NM_001285992	56367	Mm.246911	NM_019708	ENSMUSG00000063253	Scoc	0610011C06Rik|2810002J11Rik|AA415030|SCOCO	short coiled-coil protein	protein-coding
1174-2	chr16	33738859	33740031	+	583	intron (NM_175256, intron 9 of 14)	intron (NM_175256, intron 9 of 14)	-54592	NM_010739	17063	Mm.3177	NM_010739	ENSMUSG00000022824	Muc13	114/A10|14/A10|AI159736|Lrrp|Ly64|NJ-1	mucin 13, epithelial transmembrane	protein-coding
893-3	chr17	27555429	27556320	+	583	promoter-TSS (NM_016660)	promoter-TSS (NM_016660)	-700	NM_001166539	15361	Mm.4438	NM_016660	ENSMUSG00000046711	Hmga1	AL023995|Hmga1a|Hmga1b|Hmgi|Hmgiy|Hmgy	high mobility group AT-hook 1	protein-coding
1248-2	chr1	92906494	92907740	+	583	exon (NM_175118, exon 1 of 2)	exon (NM_175118, exon 1 of 2)	128	NM_175118	67446	Mm.46179	NM_175118	ENSMUSG00000047067	Dusp28	0710001B24Rik|AV005521	dual specificity phosphatase 28	protein-coding
894-3	chr3	102484658	102485550	+	583	intron (NM_001112698, intron 1 of 2)	intron (NM_001112698, intron 1 of 2)	15185	NM_013609	18049	Mm.1259	NM_013609	ENSMUSG00000027859	Ngf	Ngfb|beta-NGF	nerve growth factor	protein-coding
826	chr1	36902365	36903189	+	583	intron (NM_018872, intron 1 of 40)	L1M4|LINE|L1	36750	NM_018872	56030	Mm.186943	NM_018872	ENSMUSG00000026116	Tmem131	2610524E03Rik|CC28|D1Bwg0491e|Neg|RW1|YR-23|mKIAA0257	transmembrane protein 131	protein-coding
827	chr11	89081308	89082133	+	583	intron (NM_001033266, intron 2 of 3)	(CTGTG)n|Simple_repeat|Simple_repeat	7879	NM_001033266	217071	Mm.342127	NM_001033266	ENSMUSG00000072553	Gm525	-	predicted gene 525	protein-coding
1217-4	chr3	108017418	108018633	+	583	promoter-TSS (NM_010358)	promoter-TSS (NM_010358)	-52	NM_010358	14862	Mm.37199	NM_010358	ENSMUSG00000058135	Gstm1	Gstb-1|Gstb1	glutathione S-transferase, mu 1	protein-coding
1240-4	chr16	21138163	21139401	+	583	Intergenic	Intergenic	15162	NM_025634	66561	Mm.422867	NM_025634	ENSMUSG00000090356	Teddm3	2310042E22Rik	transmembrane epididymal family member 3	protein-coding
1197	chr10	93272628	93273823	+	582	intron (NM_013508, intron 2 of 4)	intron (NM_013508, intron 2 of 4)	37934	NM_013508	13713	Mm.4454	NM_013508	ENSMUSG00000008398	Elk3	D430049E23Rik|Erp|Etrp|Net|Sap-2	ELK3, member of ETS oncogene family	protein-coding
1023-4	chr7	128672296	128673317	+	582	intron (NM_178641, intron 9 of 19)	intron (NM_178641, intron 9 of 19)	-16064	NM_001346517	101490	Mm.490344	NM_178641	ENSMUSG00000042105	Inpp5f	5830435P03Rik|AI115354|AW561896|SAC2|cI-27|hSAC2|mKIAA0966	inositol polyphosphate-5-phosphatase F	protein-coding
967	chr1	34130727	34131692	+	582	intron (NM_001276764, intron 8 of 102)	intron (NM_001276764, intron 8 of 102)	13850	NR_105861	102466987		NR_105861	ENSMUSG00000105982	Mir6896	mmu-mir-6896	microRNA 6896	ncRNA
981-3	chr11	104279174	104280153	+	582	intron (NM_001038609, intron 1 of 11)	intron (NM_001038609, intron 1 of 11)	48227	NM_001285454	17762	Mm.1287	NM_010838	ENSMUSG00000018411	Mapt	AI413597|AW045860|Mtapt|Tau	microtubule-associated protein tau	protein-coding
836-2	chr11	76478863	76479697	+	582	intron (NM_198894, intron 3 of 22)	intron (NM_198894, intron 3 of 22)	-10815	NM_001291186	109934	Mm.258939	NM_198018	ENSMUSG00000017631	Abr	-	active BCR-related gene	protein-coding
1285-4	chr17	86253654	86254937	+	582	intron (NM_011104, intron 1 of 14)	intron (NM_011104, intron 1 of 14)	32883	NR_045435	72104	Mm.443401	NR_045435	ENSMUSG00000100738	2010106C02Rik	-	RIKEN cDNA 2010106C02 gene	ncRNA
908-6	chr9	46063067	46063973	+	582	intron (NM_027498, intron 1 of 24)	intron (NM_027498, intron 1 of 24)	50700	NM_027498	70661	Mm.219459	NM_027498	ENSMUSG00000034135	Sik3	5730525O22Rik|9030204A07Rik|AI447252|AI846254|AI849445|Qsk|SIK-3|mKIAA0999	SIK family kinase 3	protein-coding
1103-4	chr9	72634716	72635817	+	582	Intergenic	Intergenic	-27065	NM_010890	17999	Mm.279923	NM_010890	ENSMUSG00000032216	Nedd4	AA959633|AL023035|AU019897|E430025J12Rik|EG639396|Gm7265|KIAA0093|Nedd4-1|Nedd4a	neural precursor cell expressed, developmentally down-regulated 4	protein-coding
1064-3	chrX	3326595	3327657	+	582	Intergenic	Intergenic	116564	NM_001099643	100042254		NM_001099643	ENSMUSG00000078213	Btbd35f4	Gm3750	BTB domain containing 35, family member 4	protein-coding
1255-3	chr2	31482488	31483741	+	581	intron (NR_002687, intron 5 of 15)	intron (NR_002687, intron 5 of 15)	12806	NR_002687	432466	Mm.333323	NR_002687	ENSMUSG00000046687	Gm5424	EG432466	argininosuccinate synthase pseudogene	pseudo
1166-5	chr2	32920558	32921722	+	581	exon (NM_146119, exon 9 of 14)	exon (NM_146119, exon 9 of 14)	40115	NM_199302	227738	Mm.248037	NM_199302	ENSMUSG00000026792	Lrsam1	-	leucine rich repeat and sterile alpha motif containing 1	protein-coding
1149-2	chr12	54789478	54790625	+	581	intron (NM_026998, intron 2 of 13)	intron (NM_026998, intron 2 of 13)	5611	NM_026998	72183	Mm.28240	NM_026998	ENSMUSG00000005656	Snx6	2010006G21Rik|2610032J07Rik|2810425K19Rik|AU018928|C85963	sorting nexin 6	protein-coding
1231-4	chr8	123621734	123622963	+	581	Intergenic	Intergenic	-31581	NM_133955	69581	Mm.168257	NM_133955	ENSMUSG00000039960	Rhou	2310026M05Rik|AI182090|Arhu|CDC42L1|G28K|WRCH-1|WRCH1|mG28K	ras homolog family member U	protein-coding
1039-4	chr16	38110094	38111131	+	581	intron (NM_001347232, intron 1 of 11)	intron (NM_001347232, intron 1 of 11)	-21352	NR_033221	414072	Mm.483602	NR_033221		BC031361	-	cDNA sequence BC031361	ncRNA
1077-2	chr10	116909516	116910591	+	580	intron (NM_001003950, intron 9 of 9)	intron (NM_001003950, intron 9 of 9)	-13174	NM_001033333	237558	Mm.336386	NM_001033333	ENSMUSG00000034057	Myrfl	Gm239	myelin regulatory factor-like	protein-coding
1145-2	chr18	61043504	61044647	+	580	Intergenic	Intergenic	-1075	NM_001146268	18596	Mm.4146	NM_008809	ENSMUSG00000024620	Pdgfrb	AI528809|CD140b|PDGFR-1|Pdgfr	platelet derived growth factor receptor, beta polypeptide	protein-coding
1030-7	chr2	152694076	152695104	+	580	intron (NM_010376, intron 9 of 11)	intron (NM_010376, intron 9 of 11)	7442	NM_025543	66405	Mm.440291	NM_025543	ENSMUSG00000042814	Mcts2	2400002F11Rik|MCT-2	malignant T cell amplified sequence 2	protein-coding
990-5	chr19	59587259	59588247	+	580	Intergenic	Intergenic	94617	NR_045308	72647	Mm.410849	NR_045308	ENSMUSG00000100119	2700089I24Rik	-	RIKEN cDNA 2700089I24 gene	ncRNA
1109-6	chr4	141363822	141364929	+	580	Intergenic	Intergenic	-3817	NM_001085513	277743	Mm.294614	NM_001085513	ENSMUSG00000006218	Fam131c	Gm693	family with sequence similarity 131, member C	protein-coding
948-2	chr12	84193404	84194350	+	580	5' UTR (NM_001163502, exon 1 of 13)	5' UTR (NM_001163502, exon 1 of 13)	138	NM_001163502	238317	Mm.31256	NM_001163501	ENSMUSG00000042507	Elmsan1	9430029N19Rik|C130039O16Rik|Gm260	ELM2 and Myb/SANT-like domain containing 1	protein-coding
1153-5	chr7	24398974	24400125	+	580	promoter-TSS (NM_028047)	promoter-TSS (NM_028047)	-79	NM_028047	71997	Mm.150977	NM_028047	ENSMUSG00000002210	Smg9	1500002O20Rik|AI429693|N28092	smg-9 homolog, nonsense mediated mRNA decay factor (C. elegans)	protein-coding
927	chr1	55028662	55029587	+	579	Intergenic	ORR1D2|LTR|ERVL-MaLR	-1646	NM_031179	81898	Mm.279736	NM_031179	ENSMUSG00000025982	Sf3b1	155kDa|2810001M05Rik|AA409119|Prp10|SAP155|SF3b155|TA-8|Targ4	splicing factor 3b, subunit 1	protein-coding
926	chr11	61702709	61703633	+	579	exon (NM_178618, exon 4 of 5)	exon (NM_178618, exon 4 of 5)	17628	NM_001033227	109342	Mm.441070	NM_001033227	ENSMUSG00000042371	Slc5a10	C330021F16Rik|SGLT5	solute carrier family 5 (sodium/glucose cotransporter), member 10	protein-coding
1161-2	chr17	44709513	44710672	+	579	intron (NM_001146038, intron 5 of 8)	intron (NM_001146038, intron 5 of 8)	26084	NM_001271631	12393	Mm.391013	NM_009820	ENSMUSG00000039153	Runx2	AML3|Cbf|Cbfa-1|Cbfa1|LS3|Osf2|PEBP2aA|Pebp2a1|Pebpa2a	runt related transcription factor 2	protein-coding
850-4	chr16	93453327	93454175	+	579	intron (NR_040494, intron 1 of 2)	intron (NR_040494, intron 1 of 2)	5121	NR_040494	72264	Mm.396204	NR_040494	ENSMUSG00000099968	1700029J03Rik	-	RIKEN cDNA 1700029J03 gene	ncRNA
859-4	chr5	147120552	147121409	+	579	Intergenic	B3|SINE|B2	43634	NM_009087	20018	Mm.317557	NM_009087	ENSMUSG00000029642	Polr1d	1110003G10Rik|AC19|RPA16|Rpo1-3	polymerase (RNA) I polypeptide D	protein-coding
936-4	chrX	38646275	38647209	+	578	Intergenic	4.5SRNA|scRNA|scRNA	-11599	NM_021550	59048	Mm.441410	NM_021550	ENSMUSG00000048970	C1galt1c1	1500002I11Rik|AB030184|C1GalT2|C81205|Cosmc	C1GALT1-specific chaperone 1	protein-coding
1414	chr1	186586564	186587976	+	578	Intergenic	Intergenic	-28589	NR_131158	320449	Mm.404477	NR_131124	ENSMUSG00000103690	A730004F24Rik	-	RIKEN cDNA A730004F24 gene	ncRNA
1117-4	chr12	15721308	15722423	+	578	Intergenic	G-rich|Low_complexity|Low_complexity	79236	NR_105809	102465204		NR_105809	ENSMUSG00000098480	Mir6387	Gm27281|mmu-mir-6387	microRNA 6387	ncRNA
1118-7	chr7	143052184	143053300	+	578	promoter-TSS (NM_133655)	promoter-TSS (NM_133655)	-8	NM_133655	12520	Mm.806	NM_133655	ENSMUSG00000037706	Cd81	Tapa-1|Tapa1|Tspan28	CD81 antigen	protein-coding
1128-4	chr11	90730887	90732013	+	578	Intergenic	Lx7|LINE|L1	-43849	NM_001357543	71943	Mm.167868	NM_028011	ENSMUSG00000020541	Tom1l1	2310045L10Rik|C80573|Srcasm	target of myb1-like 1 (chicken)	protein-coding
1214	chr10	43991882	43993094	+	578	exon (NM_001368305, exon 6 of 22)	exon (NM_001368305, exon 6 of 22)	12358	NM_172393	11630	Mm.292082	NM_172393	ENSMUSG00000019866	Crybg1	Aim1	crystallin beta-gamma domain containing 1	protein-coding
1103-3	chr4	95077081	95078182	+	578	Intergenic	Intergenic	-25409	NM_010591	16476	Mm.275071	NM_010591	ENSMUSG00000052684	Jun	AP-1|Junc|c-jun	jun proto-oncogene	protein-coding
1090-3	chr11	118370183	118371271	+	578	Intergenic	B3|SINE|B2	-15316	NM_011594	21858	Mm.206505	NM_011594	ENSMUSG00000017466	Timp2	D11Bwg1104e|Timp-2	tissue inhibitor of metalloproteinase 2	protein-coding
1215	chr11	51686795	51688008	+	578	intron (NM_025319, intron 1 of 1)	B3|SINE|B2	1233	NM_025319	66050	Mm.35693	NM_025319	ENSMUSG00000007777	0610009B22Rik	-	RIKEN cDNA 0610009B22 gene	protein-coding
1140	chr1	186697922	186699060	+	578	intron (NM_001329107, intron 1 of 7)	intron (NM_001329107, intron 1 of 7)	7498	NM_009367	21808	Mm.18213	NM_009367	ENSMUSG00000039239	Tgfb2	BB105277|Tgf-beta2|Tgfb-2	transforming growth factor, beta 2	protein-coding
1224	chr1	39426165	39427387	+	578	intron (NM_001357522, intron 1 of 18)	MTC-int|LTR|ERVL-MaLR	51971	NM_018775	54610	Mm.387293	NM_018775	ENSMUSG00000003134	Tbc1d8	AD3|HBLP1|VRP	TBC1 domain family, member 8	protein-coding
1303	chr19	15924406	15925707	+	577	promoter-TSS (NM_001205339)	promoter-TSS (NM_001205339)	3	NM_177420	107272	Mm.289936	NM_177420	ENSMUSG00000024640	Psat1	D8Ertd814e|EPIP|PSA|Psat	phosphoserine aminotransferase 1	protein-coding
1124-5	chr17	7756876	7757998	+	577	intron (NM_001081416, intron 13 of 20)	intron (NM_001081416, intron 13 of 20)	69865	NM_001081416	68655	Mm.379161	NM_001081416	ENSMUSG00000071984	Fndc1	1110027O12Rik|1110051A18Rik|mKIAA1866	fibronectin type III domain containing 1	protein-coding
1243-5	chr6	53621092	53622333	+	577	intron (NM_001327821, intron 7 of 10)	intron (NM_001327821, intron 7 of 10)	48338	NM_172728	231991	Mm.227444	NM_172728	ENSMUSG00000053007	Creb5	9430076C15Rik|CRE-BPa|Crebpa|D430026C09Rik	cAMP responsive element binding protein 5	protein-coding
1221-3	chr15	82394092	82395311	+	577	promoter-TSS (NR_106153)	promoter-TSS (NR_106153)	-679	NM_001104531	545123	Mm.482764	NM_001104531	ENSMUSG00000068085	Cyp2d11	Cyp2d|P450-2D	cytochrome P450, family 2, subfamily d, polypeptide 11	protein-coding
1174-3	chr2	70062144	70063316	+	577	intron (NM_177376, intron 2 of 34)	intron (NM_177376, intron 2 of 34)	23604	NM_177376	329421	Mm.99648	NM_177376	ENSMUSG00000042064	Myo3b	A430065P19Rik	myosin IIIB	protein-coding
1055-7	chr2	179947992	179949045	+	577	intron (NM_001081092, intron 1 of 14)	intron (NM_001081092, intron 1 of 14)	28128	NM_001081092	228980	Mm.235542	NM_001081092	ENSMUSG00000039117	Taf4	135kDa|AI450312|TAFII130|TAFII135|Taf2c1|Taf4a	TATA-box binding protein associated factor 4	protein-coding
1344	chr16	21210862	21212204	+	577	intron (NM_010143, intron 1 of 15)	intron (NM_010143, intron 1 of 15)	6738	NM_010143	13845	Mm.6972	NM_010143	ENSMUSG00000005958	Ephb3	AW456895|Cek10|Etk2|HEK2|MDK5|Sek4|Tyro6	Eph receptor B3	protein-coding
1032-5	chr3	85194416	85195446	+	577	Intergenic	RMER6B|LTR|ERVK	-122588	NR_040542	73283	Mm.489084	NR_040542	ENSMUSG00000099995	1700036G14Rik	-	RIKEN cDNA 1700036G14 gene	ncRNA
1219	chr11	75565420	75566637	+	577	intron (NM_001199284, intron 9 of 13)	intron (NM_001199284, intron 9 of 13)	14599	NR_039553	100628624		NR_039553	ENSMUSG00000093100	Mir3971	mmu-mir-3971|mu-mir-3971	microRNA 3971	ncRNA
1027-8	chr8	71507581	71508606	+	577	exon (NM_032398, exon 3 of 6)	exon (NM_032398, exon 3 of 6)	3676	NM_032398	84094	Mm.260768	NM_032398	ENSMUSG00000034845	Plvap	MECA32|Pv1	plasmalemma vesicle associated protein	protein-coding
1104-4	chr4	133534336	133535438	+	577	intron (NM_010948, intron 4 of 7)	B3|SINE|B2	11140	NM_010948	18221	Mm.69	NM_010948	ENSMUSG00000028851	Nudc	SIG-92|Silg92	nudC nuclear distribution protein	protein-coding
827-6	chr4	139213486	139214311	+	576	intron (NM_001271405, intron 1 of 8)	intron (NM_001271405, intron 1 of 8)	19787	NM_001271405	12345	Mm.2945	NM_009798	ENSMUSG00000028745	Capzb	1700120C01Rik|AI325129|CPB1|CPB2|CPbeat2|CPbeta1|CPbeta2|Cappb1	capping protein (actin filament) muscle Z-line, beta	protein-coding
1044-2	chr15	66937994	66939036	+	576	intron (NM_008681, intron 11 of 15)	intron (NM_008681, intron 11 of 15)	31126	NM_008681	17988	Mm.30837	NM_008681	ENSMUSG00000005125	Ndrg1	CAP43|CMT4D|DRG1|HMSNL|NMSL|Ndr1|Ndrl|PROXY1|RTP|TDD5	N-myc downstream regulated gene 1	protein-coding
1351	chr6	128046494	128047843	+	576	intron (NM_001356301, intron 1 of 7)	intron (NM_001356301, intron 1 of 7)	96410	NM_175414	109246	Mm.21814	NM_175414	ENSMUSG00000030352	Tspan9	6720474K14Rik|9430079M16Rik|AU018597|Tspan-9	tetraspanin 9	protein-coding
811	chr10	118991004	118991813	+	576	Intergenic	Intergenic	59091	NR_152787	102636674	Mm.399320	NR_152787	ENSMUSG00000112778	Gm33677	-	predicted gene, 33677	ncRNA
1092-4	chr19	45955833	45956923	+	576	intron (NM_198296, intron 11 of 25)	B3|SINE|B2	-41759	NR_152221	100174921	Mm.487206	NR_152221		4930505N22Rik	-	RIKEN cDNA 4930505N22 gene	ncRNA
1010-2	chr3	97533975	97534983	+	576	Intergenic	Intergenic	75711	NM_026539	68058	Mm.31761	NM_026539	ENSMUSG00000028089	Chd1l	4432404A22Rik|Alc1|Snf2p	chromodomain helicase DNA binding protein 1-like	protein-coding
881-3	chr8	80066847	80067726	+	575	Intergenic	Intergenic	-9278	NM_020259	15245	Mm.254493	NM_020259	ENSMUSG00000064325	Hhip	Hhip1	Hedgehog-interacting protein	protein-coding
864-2	chr19	18419858	18420720	+	575	Intergenic	Intergenic	211524	NM_017375	20409	Mm.172222	NM_017375	ENSMUSG00000024725	Ostf1	C78236|SH3P2|Sh3d3	osteoclast stimulating factor 1	protein-coding
1258	chr11	97816906	97818162	+	575	intron (NM_010688, intron 3 of 6)	intron (NM_010688, intron 3 of 6)	17969	NM_010688	16796	Mm.271967	NM_010688	ENSMUSG00000038366	Lasp1	AA408629|Def-4|LASP-1|MLN 50|SH3P6|Tg(Col1a1-lacZ)1Ngma	LIM and SH3 protein 1	protein-coding
817-7	chr5	139826306	139827121	+	575	intron (NM_001356963, intron 1 of 2)	CpG	181	NM_001356963	66506	Mm.29070	NM_025604	ENSMUSG00000029551	Psmg3	1810042K04Rik|4930403H09Rik|AI303239	proteasome (prosome, macropain) assembly chaperone 3	protein-coding
920-3	chr14	70358446	70359364	+	575	Intergenic	ORR1A2-int|LTR|ERVL-MaLR	-7481	NM_001135151	213053	Mm.270647	NM_144808	ENSMUSG00000022094	Slc39a14	FAD-123|ZIP-14|Zip14|fad123	solute carrier family 39 (zinc transporter), member 14	protein-coding
1058-5	chr15	76632738	76633794	+	575	exon (NM_183091, exon 17 of 26)	exon (NM_183091, exon 17 of 26)	6663	NM_183091	72749	Mm.358749	NM_183091	ENSMUSG00000059323	Tonsl	2810439M11Rik|Nfkbil2	tonsoku-like, DNA repair protein	protein-coding
1185	chr1	74587690	74588873	+	575	promoter-TSS (NM_001310668)	promoter-TSS (NM_001310668)	-8	NM_001305652	66821	Mm.358700	NM_025784	ENSMUSG00000026172	Bcs1l	9130022O19Rik	BCS1-like (yeast)	protein-coding
1001-4	chr3	88381482	88382481	+	575	Intergenic	Intergenic	2485	NM_007541	12096	Mm.389459	NM_007541	ENSMUSG00000074483	Bglap	BGP|Bglap1|OC|OG1|mOC-A	bone gamma carboxyglutamate protein	protein-coding
1166	chr12	33343149	33344313	+	575	intron (NM_001033436, intron 3 of 7)	intron (NM_001033436, intron 3 of 7)	41216	NM_001033436	380753	Mm.41540	NM_028139	ENSMUSG00000020564	Atxn7l1	2810423G08Rik|Atxn7l4	ataxin 7-like 1	protein-coding
1280	chr1	33969872	33971150	+	575	intron (NM_001276764, intron 3 of 102)	intron (NM_001276764, intron 3 of 102)	-41084	NM_133833	13518	Mm.336625	NM_010081	ENSMUSG00000026131	Dst	2310001O04Rik|A830042E19Rik|AW554249|BP230|BPAG1-n|Bpag|Bpag1|Macf2|ah|athetoid|dt|mKIAA0728|nmf203|nmf339	dystonin	protein-coding
914-6	chr4	150745101	150746013	+	575	Intergenic	Intergenic	52395	NR_162802	114482888		NR_162802		Mir12196	mmu-mir-12196	microRNA mir-12196	ncRNA
1025	chr1	40070888	40071911	+	575	Intergenic	Intergenic	-13315	NM_010555	16178	Mm.1349	NM_010555	ENSMUSG00000026073	Il1r2	CD121b|Il1r-2	interleukin 1 receptor, type II	protein-coding
986	chr10	8694764	8695748	+	575	Intergenic	MT2B1|LTR|ERVL	-176431	NM_177387	338362	Mm.41163	NM_177387	ENSMUSG00000047712	Ust	D930010O20Rik|UA2OST	uronyl-2-sulfotransferase	protein-coding
981-4	chr6	128415474	128416453	+	574	exon (NM_133927, exon 4 of 12)	exon (NM_133927, exon 4 of 12)	8947	NM_133927	101142	Mm.31345	NM_133927	ENSMUSG00000001518	Itfg2	2700050P07Rik|AI646725	integrin alpha FG-GAP repeat containing 2	protein-coding
927-5	chr17	56475330	56476255	+	574	intron (NM_001252455, intron 1 of 27)	CpG	688	NM_001252453	19280	Mm.258771	NM_011218	ENSMUSG00000013236	Ptprs	AL022616|PTP|PTP-NU3|PTPNU-3|PTPsigma|Ptpt9|R-PTP-S|RPTPsigma	protein tyrosine phosphatase, receptor type, S	protein-coding
1013-6	chr6	124576791	124577802	+	574	intron (NM_001113356, intron 8 of 10)	intron (NM_001113356, intron 8 of 10)	6866	NM_001113356	667277	Mm.481484	NM_001113356	ENSMUSG00000098470	C1rb	Gm8551|mC1rB	complement component 1, r subcomponent B	protein-coding
1245	chr1	91523231	91524474	+	574	intron (NM_028718, intron 13 of 14)	intron (NM_028718, intron 13 of 14)	-16713	NM_001039126	65247	Mm.234152	NM_023046	ENSMUSG00000026311	Asb1	1700029O08Rik|1700054C17Rik|AI426616|AI851378|mKIAA1146	ankyrin repeat and SOCS box-containing 1	protein-coding
1200-3	chr13	102880085	102881283	+	574	intron (NM_175171, intron 4 of 28)	intron (NM_175171, intron 4 of 28)	120429	NR_130171	76624	Mm.426384	NR_130171	ENSMUSG00000091906	1700099I09Rik	-	RIKEN cDNA 1700099I09 gene	ncRNA
1687	chr17	26600659	26602344	+	574	intron (NM_026170, intron 1 of 9)	intron (NM_026170, intron 1 of 9)	39989	NM_026170	67458	Mm.30496	NM_026170	ENSMUSG00000001576	Ergic1	1200007D18Rik|maa-136	endoplasmic reticulum-golgi intermediate compartment (ERGIC) 1	protein-coding
1151-3	chr9	46172469	46173618	+	574	intron (NM_027498, intron 4 of 24)	B4A|SINE|B4	-55587	NM_009692	11806	Mm.26743	NM_009692	ENSMUSG00000032083	Apoa1	Alp-1|Apoa-1|Brp-14|Ltw-1|Lvtw-1|Sep-1|Sep-2|Sep2|apo-AI|apoA-I	apolipoprotein A-I	protein-coding
908-2	chr14	101800639	101801545	+	574	intron (NM_201529, intron 2 of 30)	L1MC1|LINE|L1	-39531	NM_001347628	380928	Mm.218981	NM_201529	ENSMUSG00000033060	Lmo7	C78582|FBXO20|Gm914|mKIAA0858	LIM domain only 7	protein-coding
1249-2	chr7	110061391	110062638	+	574	intron (NM_009281, intron 1 of 15)	CpG	312	NM_009281	20841	Mm.10815	NM_009281	ENSMUSG00000061079	Zfp143	AA959806|AU015869|D7Ertd805e|KRAB14|SBF|Staf|Zfp79|Zfp80-rs1|Znf143|pHZ-1	zinc finger protein 143	protein-coding
1016-7	chr8	119711835	119712849	+	574	intron (NM_026922, intron 1 of 26)	intron (NM_026922, intron 1 of 26)	12333	NM_026922	69047	Mm.46251	NM_026922	ENSMUSG00000034112	Atp2c2	1810010G06Rik|Spca2|mKIAA0703	ATPase, Ca++ transporting, type 2C, member 2	protein-coding
1057-3	chr12	102568407	102569462	+	574	3' UTR (NM_172584, exon 10 of 10)	3' UTR (NM_172584, exon 10 of 10)	13993	NM_007693	12652	Mm.4137	NM_007693	ENSMUSG00000021194	Chga	ChrA|cgA	chromogranin A	protein-coding
1193-5	chr2	125284336	125285527	+	574	Intergenic	Intergenic	37416	NM_023595	110074	Mm.282499	NM_023595	ENSMUSG00000027203	Dut	5031412I06Rik|5133400F09Rik|D2Bwg0749e|Dutp|dUTPase	deoxyuridine triphosphatase	protein-coding
1151	chr17	12381464	12382613	+	574	intron (NM_008877, intron 1 of 18)	intron (NM_008877, intron 1 of 18)	3429	NM_008877	18815	Mm.971	NM_008877	ENSMUSG00000059481	Plg	AI649309|Pg	plasminogen	protein-coding
968	chr1	6832814	6833780	+	573	intron (NR_045189, intron 13 of 22)	intron (NR_045189, intron 13 of 22)	103246	NR_045188	240690	Mm.234612	NM_173868	ENSMUSG00000033740	St18	AV348974|Myt3|NZF-3|Nzf3|mKIAA0535	suppression of tumorigenicity 18	protein-coding
1304	chr11	115186933	115188235	+	573	promoter-TSS (NM_001362890)	promoter-TSS (NM_001362890)	97	NM_001033393	320534	Mm.260587	NM_001033393	ENSMUSG00000045980	Tmem104	C630005D06Rik|mFLJ00021	transmembrane protein 104	protein-coding
1204-3	chr15	97581429	97582631	+	573	Intergenic	Intergenic	123792	NM_028003	71919	Mm.12255	NM_028003	ENSMUSG00000022466	Rpap3	2310042P20Rik|D15Ertd682e	RNA polymerase II associated protein 3	protein-coding
1259-2	chr11	101807016	101808273	+	573	Intergenic	Intergenic	-22334	NM_001316365	18612	Mm.5025	NM_008815	ENSMUSG00000017724	Etv4	AW414408|Pea-3|Pea3	ets variant 4	protein-coding
1155-5	chr3	121576692	121577845	+	573	Intergenic	Intergenic	-44924	NM_145394	213603	Mm.33062	NM_145394	ENSMUSG00000039865	Slc44a3	BC010552	solute carrier family 44, member 3	protein-coding
1265	chr10	117560620	117561883	+	573	Intergenic	Lx3A|LINE|L1	-68249	NM_027468	70574	Mm.339332	NM_027468	ENSMUSG00000020183	Cpm	1110060I01Rik|5730456K23Rik|AA589379|E030045M14Rik	carboxypeptidase M	protein-coding
1307	chr14	21848421	21849726	+	573	promoter-TSS (NM_026965)	promoter-TSS (NM_026965)	-163	NM_026965	69156	Mm.11827	NM_026965	ENSMUSG00000021773	Comtd1	1810030M08Rik|MT773	catechol-O-methyltransferase domain containing 1	protein-coding
1014-3	chr2	164857091	164858103	+	573	5' UTR (NM_011125, exon 1 of 16)	5' UTR (NM_011125, exon 1 of 16)	111	NM_011125	18830	Mm.6105	NM_011125	ENSMUSG00000017754	Pltp	Bpife|OD107	phospholipid transfer protein	protein-coding
1038-4	chrX	11869491	11870527	+	573	Intergenic	(CA)n|Simple_repeat|Simple_repeat	210544	NM_175045	71458	Mm.196328	NM_029510	ENSMUSG00000040363	Bcor	2900008C10Rik|5830466J11Rik|8430401K06Rik|BcorR|D930024N20Rik|mKIAA1575	BCL6 interacting corepressor	protein-coding
1024-6	chr7	59751000	59752022	+	573	promoter-TSS (NR_002895)	promoter-TSS (NR_002895)	69	NR_033778	64244		NR_033778	ENSMUSG00000096475	Snord116l1	Pwcr1l1	small nucleolar RNA, C/D box 116-like 1	snoRNA
1214-2	chr19	47316192	47317404	+	573	intron (NM_001164717, intron 7 of 13)	intron (NM_001164717, intron 7 of 13)	-43209	NR_105961	102466782		NR_105961	ENSMUSG00000098786	Mir6995	Gm27576|mmu-mir-6995	microRNA 6995	ncRNA
1085-5	chr5	36464784	36465867	+	572	promoter-TSS (NR_126489)	promoter-TSS (NR_126489)	140	NM_024478	17713	Mm.21535	NM_024478	ENSMUSG00000029198	Grpel1	AA408748|mt-GrpE#1|mt-Grpel1	GrpE-like 1, mitochondrial	protein-coding
1194	chr10	83074206	83075398	+	572	intron (NM_021439, intron 1 of 2)	intron (NM_021439, intron 1 of 2)	89305	NM_021439	58250	Mm.360747	NM_021439	ENSMUSG00000034612	Chst11	1110020P09Rik|C4ST|C4ST-1|C4ST1|C4s	carbohydrate sulfotransferase 11	protein-coding
1127-2	chr11	114788635	114789760	+	572	exon (NM_001102615, exon 18 of 20)	exon (NM_001102615, exon 18 of 20)	6695	NM_028055	72014	Mm.38347	NM_028055	ENSMUSG00000000202	Btbd17	1500005I02Rik|Tango10a	BTB (POZ) domain containing 17	protein-coding
1327-2	chr10	99938815	99940140	+	572	Intergenic	MTD-int|LTR|ERVL-MaLR	-76344	NM_001347156	17311	Mm.45124	NM_013598	ENSMUSG00000019966	Kitl	Clo|Con|Gb|Kitlg|Mgf|SCF|SF|SLF|Sl|blz|contrasted	kit ligand	protein-coding
919-2	chr2	29885836	29886753	+	572	Intergenic	Intergenic	-2720	NM_001355137	18286	Mm.330116	NM_013615	ENSMUSG00000026790	Odf2	AI848335|MMTEST29	outer dense fiber of sperm tails 2	protein-coding
822	chr11	70585125	70585945	+	572	intron (NM_001045964, intron 1 of 32)	intron (NM_001045964, intron 1 of 32)	22654	NM_016713	50932	Mm.42967	NM_016713	ENSMUSG00000020827	Mink1	B55|MINK|Map4k6|Ysk2	misshapen-like kinase 1 (zebrafish)	protein-coding
1058-6	chr5	136662597	136663653	+	571	Intergenic	Intergenic	-30021	NM_001303019	59310	Mm.5178	NM_021611	ENSMUSG00000005474	Myl10	1700027I08Rik|Mylc2pl|PLRLC	myosin, light chain 10, regulatory	protein-coding
1208-2	chr14	33217035	33218241	+	571	intron (NM_153800, intron 2 of 10)	intron (NM_153800, intron 2 of 10)	815	NM_153800	239027	Mm.318350	NM_153800	ENSMUSG00000063506	Arhgap22	B230341L19Rik|RHOGAP2|p68RacGAP	Rho GTPase activating protein 22	protein-coding
1149-3	chr15	74949855	74951002	+	571	Intergenic	Intergenic	-4623	NM_001164039	17069	Mm.788	NM_008529	ENSMUSG00000022587	Ly6e	Ly67|RIG-E|Sca-2|TSA-1|Tsa1	lymphocyte antigen 6 complex, locus E	protein-coding
1149	chr11	63160518	63161665	+	571	Intergenic	Intergenic	28288	NM_001302260	18858	Mm.1237	NM_008885	ENSMUSG00000018217	Pmp22	22kDa|Gas-3|HNPP|TRE002|Tr|trembler	peripheral myelin protein 22	protein-coding
956-4	chr16	95990293	95991247	+	571	exon (NM_019537, exon 1 of 7)	exon (NM_019537, exon 1 of 7)	190	NM_019537	56088	Mm.396248	NM_019537	ENSMUSG00000022913	Psmg1	AW552102|Dscr2	proteasome (prosome, macropain) assembly chaperone 1	protein-coding
957-3	chr6	5495813	5496768	+	571	promoter-TSS (NM_013743)	promoter-TSS (NM_013743)	-12	NM_013743	27273	Mm.235547	NM_013743	ENSMUSG00000019577	Pdk4	AV005916	pyruvate dehydrogenase kinase, isoenzyme 4	protein-coding
1068	chr15	78283645	78284711	+	570	TTS (NR_106137).2	TTS (NR_106137).2	671	NR_106137	102465776		NR_106137	ENSMUSG00000098996	Mir7676-1	Gm27600|mmu-mir-7676-1	microRNA 7676-1	ncRNA
1253	chr13	5864827	5866078	+	570	intron (NM_011803, intron 2 of 3)	intron (NM_011803, intron 2 of 3)	3963	NM_011803	23849	Mm.275036	NM_011803	ENSMUSG00000000078	Klf6	AI448727|BCD1|C86813|CPBP|Copeb|FM2|FM6|Ierepo1|Ierepo3|R75280|Zf9	Kruppel-like factor 6	protein-coding
1059-10	chr19	41797640	41798697	+	570	intron (NM_001163495, intron 1 of 10)	B3A|SINE|B2	3916	NM_001163495	71085	Mm.21646	NM_027667	ENSMUSG00000025154	Arhgap19	4933411B03Rik|AI120128|AW546831|mFLJ00368	Rho GTPase activating protein 19	protein-coding
976-8	chr8	110835630	110836604	+	570	intron (NM_133953, intron 8 of 25)	B4A|SINE|B4	2481	NR_028559	100217465		NR_028559		Snord111	MBII-82	small nucleolar RNA, C/D box 111	snoRNA
1247	chr11	72994393	72995638	+	570	Intergenic	Intergenic	-4130	NM_008771	18436	Mm.25722	NM_008771	ENSMUSG00000020787	P2rx1	AI323649|BB122383|P2x|Pdcd3|RP-2	purinergic receptor P2X, ligand-gated ion channel, 1	protein-coding
920-4	chr5	143456257	143457175	+	570	Intergenic	L1_Mur1|LINE|L1	-7777	NM_144915	231871	Mm.469963	NM_144915	ENSMUSG00000039206	Daglb	E330036I19Rik	diacylglycerol lipase, beta	protein-coding
1008-4	chr11	4444951	4445957	+	569	Intergenic	Intergenic	-4372	NM_029458	75828	Mm.159592	NM_029458	ENSMUSG00000020419	Hormad2	4930529M09Rik	HORMA domain containing 2	protein-coding
1092-9	chr5	118323523	118324613	+	569	Intergenic	(TG)n|Simple_repeat|Simple_repeat	78841	NM_001081236	76792	Mm.103428	NM_001081236	ENSMUSG00000032840	2410131K14Rik	-	RIKEN cDNA 2410131K14 gene	protein-coding
1130-4	chr2	70988852	70989980	+	569	intron (NM_145524, intron 3 of 9)	intron (NM_145524, intron 3 of 9)	66190	NM_001110512	228019	Mm.490343	NM_145524	ENSMUSG00000041975	Mettl8	BC004636|Tip	methyltransferase like 8	protein-coding
1122	chr11	4240313	4241433	+	569	3' UTR (NM_001013365, exon 3 of 3)	3' UTR (NM_001013365, exon 3 of 3)	4088	NM_001013365	18413	Mm.131422	NM_001013365	ENSMUSG00000058755	Osm	OncoM	oncostatin M	protein-coding
1023-3	chr19	58587987	58589008	+	569	Intergenic	Intergenic	-17832	NR_038136	69055	Mm.396318	NR_038136	ENSMUSG00000100001	1810007D17Rik	-	RIKEN cDNA 1810007D17 gene	ncRNA
1059-11	chr4	62285786	62286843	+	569	promoter-TSS (NM_025286)	promoter-TSS (NM_025286)	-115	NM_025286	20530	Mm.292539	NM_025286	ENSMUSG00000066152	Slc31a2	AI604396|CTR2	solute carrier family 31, member 2	protein-coding
1029-6	chr2	30933275	30934302	+	569	Intergenic	Intergenic	-19213	NM_133673	30934	Mm.249164	NM_133673	ENSMUSG00000026848	Tor1b	2610016F05Rik|DQ1|torsinB	torsin family 1, member B	protein-coding
1187-5	chr15	59822585	59823770	+	569	Intergenic	Intergenic	-28218	NR_045076	100503021	Mm.402924	NR_045076	ENSMUSG00000115426	Gm19510	-	predicted gene, 19510	ncRNA
1019-2	chr1	88109357	88110374	+	568	intron (NM_201410, intron 2 of 5)	MTC|LTR|ERVL-MaLR	6608	NM_201410	394435	Mm.300095	NM_201410	ENSMUSG00000090145	Ugt1a6b	A9'|Ugt1a9	UDP glucuronosyltransferase 1 family, polypeptide A6B	protein-coding
928	chr2	32707395	32708321	+	568	3' UTR (NM_130860, exon 7 of 7)	3' UTR (NM_130860, exon 7 of 7)	4926	NM_130860	107951	Mm.27557	NM_130860	ENSMUSG00000009555	Cdk9	PITALRE	cyclin-dependent kinase 9 (CDC2-related kinase)	protein-coding
1272-4	chr15	77730205	77731475	+	568	intron (NM_001168660, intron 1 of 2)	RLTR11A2|LTR|ERVK	1719	NM_001168660	71898	Mm.422856	NM_173743	ENSMUSG00000068246	Apol9b	2310016F22Rik	apolipoprotein L 9b	protein-coding
1008-3	chr10	80269691	80270697	+	568	intron (NM_133188, intron 1 of 11)	intron (NM_133188, intron 1 of 11)	5203	NM_133188	70248	Mm.148693	NM_133188	ENSMUSG00000069565	Dazap1	2410042M16Rik|mPrrp	DAZ associated protein 1	protein-coding
857-4	chr8	111258563	111259418	+	568	exon (NM_009149, exon 1 of 26)	exon (NM_009149, exon 1 of 26)	220	NM_009149	20340	Mm.276271	NM_009149	ENSMUSG00000003316	Glg1	AI593353|AW537898|CFR|CFR-1|ESL-1|MG-160|MG160|Selel	golgi apparatus protein 1	protein-coding
1081-6	chr15	73093380	73094459	+	568	3' UTR (NM_053068, exon 3 of 3)	3' UTR (NM_053068, exon 3 of 3)	3507	NM_053068	93696	Mm.23095	NM_053068	ENSMUSG00000068391	Chrac1	2410152E03Rik|2810406L04Rik|YCL1	chromatin accessibility complex 1	protein-coding
1057	chr1	72770218	72771273	+	568	Intergenic	RMER17B|LTR|ERVK	-53735	NM_008342	16008	Mm.141936	NM_008342	ENSMUSG00000039323	Igfbp2	AI255832|IBP-2|Igfbp-2|mIGFBP-2	insulin-like growth factor binding protein 2	protein-coding
1226-3	chr19	57238929	57240153	+	568	intron (NM_001362445, intron 1 of 20)	intron (NM_001362445, intron 1 of 20)	-23509	NM_178688	226251	Mm.217161	NM_178688	ENSMUSG00000025085	Ablim1	2210411C18Rik|2610209L21Rik|4833406P10Rik|9330196J19Rik|AV079770|AW060987|AW215784|Limab1|mKIAA0059	actin-binding LIM protein 1	protein-coding
1232-4	chr8	125383528	125384758	+	568	Intergenic	Intergenic	108690	NM_001081337	244668	Mm.271668	NM_001081337	ENSMUSG00000001995	Sipa1l2	BC058408|mKIAA1389	signal-induced proliferation-associated 1 like 2	protein-coding
1203	chr1	90258039	90259240	+	567	Intergenic	Intergenic	54659	NM_007722	12778	Mm.6522	NM_007722	ENSMUSG00000044337	Ackr3	AW541270|CXC-R7|CXCR-7|Cmkor1|Cxcr7|RDC-1|Rdc1	atypical chemokine receptor 3	protein-coding
936-3	chr18	78056748	78057682	+	567	intron (NM_001101038, intron 1 of 5)	intron (NM_001101038, intron 1 of 5)	226	NM_001101038	620235	Mm.35607	NM_001101038	ENSMUSG00000091055	Siglec15	Cd33l3|EG620235|SIGLEC-I	sialic acid binding Ig-like lectin 15	protein-coding
1068-3	chr17	27599138	27600204	+	567	intron (NM_019837, intron 1 of 4)	intron (NM_019837, intron 1 of 4)	23293	NM_001291046	56409	Mm.144699	NM_019837	ENSMUSG00000024213	Nudt3	1110011B09Rik|AA960325|Dipp|Dipp1	nudix (nucleotide diphosphate linked moiety X)-type motif 3	protein-coding
1173-2	chr19	47453814	47454985	+	567	intron (NM_001164717, intron 1 of 13)	intron (NM_001164717, intron 1 of 13)	10012	NM_001164717	14218	Mm.127560	NM_008018	ENSMUSG00000053617	Sh3pxd2a	2310014D11Rik|AA589508|AI256723|AI413738|C230050L11|EG329070|Fish|Gm5098|Sh3md1|TSK5|Tks5	SH3 and PX domains 2A	protein-coding
1060-5	chr7	35008007	35009065	+	567	intron (NM_008820, intron 9 of 14)	ORR1E|LTR|ERVL-MaLR	48030	NM_009884	12611	Mm.273090	NM_009884	ENSMUSG00000056216	Cebpg	C/EBP[g]|C/EBPgamma|GPE1-BP|Gpe1bp|Ig/EBP	CCAAT/enhancer binding protein (C/EBP), gamma	protein-coding
1032-4	chr15	58933108	58934138	+	567	promoter-TSS (NM_001364808)	promoter-TSS (NM_001364808)	115	NM_001368634	69694	Mm.383230	NM_175151	ENSMUSG00000050891	Tatdn1	2310079P03Rik|CDA11	TatD DNase domain containing 1	protein-coding
1030	chr1	33757845	33758873	+	566	promoter-TSS (NM_145392)	promoter-TSS (NM_145392)	-609	NM_145392	213539	Mm.247037	NM_145392	ENSMUSG00000042215	Bag2	2610042A13Rik|BC016230	BCL2-associated athanogene 2	protein-coding
1094-2	chr2	30177565	30178657	+	566	intron (NM_172660, intron 1 of 11)	intron (NM_172660, intron 1 of 11)	348	NM_172660	227695	Mm.4449	NM_172660	ENSMUSG00000039660	Spout1	9930028P05|AL033358|CENP-32|D2Wsu81e	SPOUT domain containing methyltransferase 1	protein-coding
1122-2	chr11	105372642	105373762	+	566	intron (NM_172568, intron 9 of 11)	intron (NM_172568, intron 9 of 11)	80556	NM_008626	17534	Mm.235616	NM_008626	ENSMUSG00000020695	Mrc2	Endo180|mKIAA0709|uPARAP	mannose receptor, C type 2	protein-coding
1076-8	chr8	26980462	26981536	+	565	3' UTR (NM_001101502, exon 2 of 2)	3' UTR (NM_001101502, exon 2 of 2)	3663	NM_001110508	353310	Mm.212469	NM_001101502	ENSMUSG00000085795	Zfp703	1110032O19Rik|AI430822|AL022941|Csmn1|End2|Zeppo1|Znf703|Zpo1	zinc finger protein 703	protein-coding
1193	chr1	64037652	64038843	+	565	intron (NM_033563, intron 3 of 3)	URR1B|DNA|hAT-Charlie	4254	NR_105864	102466760		NR_105864	ENSMUSG00000098487	Mir6899	Gm27384|mmu-mir-6899	microRNA 6899	ncRNA
1110-4	chr17	7929111	7930219	+	565	intron (NM_145968, intron 6 of 9)	intron (NM_145968, intron 6 of 9)	3665	NM_145968	72536	Mm.119680	NM_145968	ENSMUSG00000033450	Tagap	2610315E15Rik|TRD|Tcd-1|Tcd1|Tcd1a|tcs-1|tcs1	T cell activation Rho GTPase activating protein	protein-coding
1155-6	chr4	65476874	65478027	+	565	intron (NM_207109, intron 19 of 22)	intron (NM_207109, intron 19 of 22)	-127536	NM_053084	69807	Mm.22786	NM_053084	ENSMUSG00000051675	Trim32	1810045E12Rik|3f3|BBS11|Zfp117	tripartite motif-containing 32	protein-coding
1470	chr11	95403392	95404860	+	565	Intergenic	Intergenic	-9957	NM_025287	20747	Mm.285454	NM_025287	ENSMUSG00000057522	Spop	AI315626|Pcif1|TEF2	speckle-type BTB/POZ protein	protein-coding
1028-7	chrX	38672281	38673307	+	565	Intergenic	(CAA)n|Simple_repeat|Simple_repeat	-37651	NM_021550	59048	Mm.441410	NM_021550	ENSMUSG00000048970	C1galt1c1	1500002I11Rik|AB030184|C1GalT2|C81205|Cosmc	C1GALT1-specific chaperone 1	protein-coding
1398	chr1	93824758	93826154	+	565	5' UTR (NM_001310767, exon 1 of 10)	5' UTR (NM_001310767, exon 1 of 10)	216	NM_001310767	98314	Mm.383401	NM_178882	ENSMUSG00000073609	D2hgdh	AA408776|AA408778|AI325464	D-2-hydroxyglutarate dehydrogenase	protein-coding
959-4	chr2	35738129	35739086	+	565	Intergenic	ID_B1|SINE|B4	41875	NM_001290639	69601	Mm.29629	NM_001001602	ENSMUSG00000026883	Dab2ip	2310011D08Rik|AI480459|Aip1|mKIAA1743	disabled 2 interacting protein	protein-coding
1063	chr1	56001696	56002757	+	564	Intergenic	Intergenic	-16752	NR_126075	69356	Mm.393775	NR_126075	ENSMUSG00000100372	1700003I22Rik	-	RIKEN cDNA 1700003I22 gene	ncRNA
790-2	chr16	73239533	73240321	+	564	Intergenic	Intergenic	576778	NM_019413	19876	Mm.310772	NM_019413	ENSMUSG00000022883	Robo1	AW494633|AW742721|DUTT1|Gm310	roundabout guidance receptor 1	protein-coding
1223-2	chr2	180306697	180307918	+	564	Intergenic	Intergenic	-17428	NM_173031	271887	Mm.246640	NM_173031	ENSMUSG00000038980	Rbbp8nl	4732416F18	RBBP8 N-terminal like	protein-coding
1063-5	chr17	34942910	34943971	+	564	Intergenic	Intergenic	7568	NR_028527	100217427		NR_028527	ENSMUSG00000093009	Snord52	MBII-297	small nucleolar RNA, C/D box 52	snoRNA
1012-6	chr4	128711502	128712512	+	564	intron (NM_001195130, intron 6 of 14)	intron (NM_001195130, intron 6 of 14)	-15564	NM_001195083	54383	Mm.473738	NM_018774	ENSMUSG00000028796	Phc2	A3galt2|AA415044|D130050K19Rik|D4Ertd810e|Edr2|Mph2|p36	polyhomeotic 2	protein-coding
979-2	chr15	44873406	44874383	+	564	Intergenic	Intergenic	-7500	NR_033609	239410	Mm.352401	NR_033609	ENSMUSG00000060530	A930017M01Rik	Gm305	Smg-5 homolog, nonsense mediated mRNA decay factor pseudogene	pseudo
1202-3	chr15	97796226	97797426	+	564	intron (NM_001204275, intron 21 of 24)	intron (NM_001204275, intron 21 of 24)	12461	NM_026353	67739	Mm.28955	NM_026353	ENSMUSG00000081534	Slc48a1	4930570C03Rik	solute carrier family 48 (heme transporter), member 1	protein-coding
1252-2	chr10	92204272	92205522	+	564	intron (NR_046027, intron 7 of 8)	intron (NR_046027, intron 7 of 8)	-39719	NR_028262	110333	Mm.429764	NR_028262	ENSMUSG00000112117	Rmst	100041799|AI853140|C230053E11Rik|D930049J19Rik|Dmt2|Gm3515|M2|Ncrms	rhabdomyosarcoma 2 associated transcript (non-coding RNA)	ncRNA
1187-9	chr6	135271176	135272361	+	564	Intergenic	Intergenic	-17432	NM_001080553	14840	Mm.272306	NM_010352	ENSMUSG00000030206	Gsg1	-	germ cell associated 1	protein-coding
1129-10	chr9	20428110	20429237	+	563	3' UTR (NM_001357809, exon 10 of 10)	3' UTR (NM_001357809, exon 10 of 10)	31487	NM_011753	22688	Mm.107441	NM_011753	ENSMUSG00000063108	Zfp26	5033428C05Rik|KRAB15|Zfp-26|Zfp70|Zfp81-rs1|mKIAA4196|mkr-3|mszf14|mszf52	zinc finger protein 26	protein-coding
1321-2	chr3	105001092	105002411	+	563	TTS (NM_001163333)	TTS (NM_001163333)	-40042	NM_009520	22414	Mm.10740	NM_009520	ENSMUSG00000027840	Wnt2b	Wnt13	wingless-type MMTV integration site family, member 2B	protein-coding
1851	chr11	76349518	76351367	+	563	intron (NM_008750, intron 1 of 7)	Lx5c|LINE|L1	48699	NM_008750	18230	Mm.27915	NM_008750	ENSMUSG00000020844	Nxn	l11Jus13	nucleoredoxin	protein-coding
1162-5	chr5	125389264	125390424	+	563	intron (NM_019639, intron 1 of 1)	CpG	173	NM_019639	22190	Mm.331	NM_019639	ENSMUSG00000008348	Ubc	2700054O04Rik|AI194771|Rps27a|TI-225|Uba52|Ubb	ubiquitin C	protein-coding
1227-3	chr14	33953094	33954319	+	563	promoter-TSS (NM_015745)	promoter-TSS (NM_015745)	-297	NM_015745	19661	Mm.436622	NM_015745	ENSMUSG00000041534	Rbp3	Irbp|Rbp-3	retinol binding protein 3, interstitial	protein-coding
1059-6	chr15	67252050	67253107	+	563	intron (NR_045140, intron 4 of 8)	Lx9|LINE|L1	25809	NR_045140	69334	Mm.63770	NR_045140	ENSMUSG00000102069	1700012I11Rik	-	RIKEN cDNA 1700012I11 gene	ncRNA
1200-2	chr10	128283666	128284864	+	562	intron (NM_019963, intron 19 of 23)	intron (NM_019963, intron 19 of 23)	13767	NM_019963	20847	Mm.293120	NM_019963	ENSMUSG00000040033	Stat2	1600010G07Rik|AW496480	signal transducer and activator of transcription 2	protein-coding
821	chr1	166947266	166948085	+	562	Intergenic	MLT1K|LTR|ERVL-MaLR	52055	NR_037988	100503962	Mm.216842	NR_037988	ENSMUSG00000102548	Gm16701	-	predicted gene, 16701	ncRNA
1115-5	chr13	43268657	43269770	+	562	intron (NM_001033399, intron 1 of 1)	MER21B|LTR|ERVL	34959	NM_001033399	328232	Mm.441399	NM_001033399	ENSMUSG00000051335	Gfod1	9630032O13|AI850995	glucose-fructose oxidoreductase domain containing 1	protein-coding
1379-3	chr10	77582571	77583948	+	562	intron (NM_145925, intron 1 of 5)	intron (NM_145925, intron 1 of 5)	1604	NM_145925	108705	Mm.28853	NM_145925	ENSMUSG00000009291	Pttg1ip	1810010L20Rik|AI314311|AU018448|C79540|PBF	pituitary tumor-transforming 1 interacting protein	protein-coding
1253-3	chr9	86999641	87000892	+	562	Intergenic	Intergenic	-15271	NM_001037907	382089	Mm.92244	NM_001037907	ENSMUSG00000047897	Ripply2	C030002E08Rik|Gm1122	ripply transcriptional repressor 2	protein-coding
1160-6	chr7	141221449	141222607	+	561	promoter-TSS (NR_029793)	promoter-TSS (NR_029793)	-535	NR_029793	387206		NR_029793	ENSMUSG00000065551	Mir210	Mirn210|mir-210|mmu-mir-210	microRNA 210	ncRNA
1160	chr10	70127763	70128921	+	561	intron (NM_001111121, intron 1 of 8)	intron (NM_001111121, intron 1 of 8)	31221	NM_001111121	76551	Mm.281741	NM_001111121	ENSMUSG00000048701	Ccdc6	2810012H18Rik|AA536681|AA960498|AW061011	coiled-coil domain containing 6	protein-coding
1270-4	chr8	108947096	108948364	+	561	exon (NM_007496, exon 9 of 10)	exon (NM_007496, exon 9 of 10)	10870	NR_037295	100526511		NR_037295	ENSMUSG00000093241	Mir3108	mir-3108|mmu-mir-3108	microRNA 3108	ncRNA
1437-3	chr2	48948833	48950268	+	561	promoter-TSS (NM_011958)	promoter-TSS (NM_011958)	42	NM_029924	109241	Mm.440436	NM_029924	ENSMUSG00000036792	Mbd5	9430004D19Rik|AA536666|AI426407|C030040A15Rik|Gm1630	methyl-CpG binding domain protein 5	protein-coding
861-5	chr7	30559124	30559983	+	561	promoter-TSS (NM_001290569)	promoter-TSS (NM_001290569)	93	NM_029377	75660	Mm.379242	NM_029377	ENSMUSG00000036845	Lin37	1810054G18Rik	lin-37 homolog (C. elegans)	protein-coding
2243	chr2	144685714	144687955	+	561	intron (NM_025314, intron 4 of 5)	intron (NM_025314, intron 4 of 5)	86881	NM_025314	66044	Mm.28109	NM_025314	ENSMUSG00000027430	Dtd1	0610006H08Rik|DTD|DUE-B|Hars2	D-tyrosyl-tRNA deacylase 1	protein-coding
1072	chr11	68363418	68364488	+	561	intron (NM_008744, intron 2 of 6)	intron (NM_008744, intron 2 of 6)	22873	NM_008744	18208	Mm.39095	NM_008744	ENSMUSG00000020902	Ntn1	AI561871|BC019633|Netrin-1	netrin 1	protein-coding
1014-2	chr1	153561624	153562636	+	561	Intergenic	B4A|SINE|B4	-12416	NM_028749	74091	Mm.24887	NM_028749	ENSMUSG00000042684	Npl	0610033B02Rik	N-acetylneuraminate pyruvate lyase	protein-coding
1206-5	chr5	137628299	137629503	+	561	promoter-TSS (NM_001168652)	promoter-TSS (NM_001168652)	-222	NM_001168652	231798	Mm.200763	NM_146164	ENSMUSG00000093445	Lrch4	2810008P14Rik|2900069C24Rik|AI558103|LRN|LRRN4|SAP25|mFLJ00248	leucine-rich repeats and calponin homology (CH) domain containing 4	protein-coding
836-4	chrX	56730648	56731482	+	561	promoter-TSS (NM_010211)	promoter-TSS (NM_010211)	-696	NM_010211	14199	Mm.3126	NM_010211	ENSMUSG00000023092	Fhl1	FHL-1|KyoT|RAM14-1|SLIM|SLIM-1	four and a half LIM domains 1	protein-coding
1230-3	chr12	16194491	16195719	+	561	Intergenic	ORR1D2-int|LTR|ERVL-MaLR	-378320	NM_144551	217410	Mm.491136	NM_144551	ENSMUSG00000020601	Trib2	AW319517|TRB-2|TRB2	tribbles pseudokinase 2	protein-coding
1116-2	chr12	27194929	27196043	+	560	Intergenic	Intergenic	-34970	NR_045870	636791	Mm.423496	NM_001039248	ENSMUSG00000094002	Gm9866	EG636791	predicted gene 9866	ncRNA
933-5	chr6	112839251	112840182	+	560	intron (NM_080448, intron 1 of 21)	intron (NM_080448, intron 1 of 21)	107550	NM_080448	259302	Mm.236401	NM_080448	ENSMUSG00000030257	Srgap3	AI452337|Arhgap14|D130026O08Rik|Gbi|MEGAP|WRP|mKIAA0411	SLIT-ROBO Rho GTPase activating protein 3	protein-coding
1450	chr15	38431726	38433174	+	560	Intergenic	Lx8|LINE|L1	58097	NR_105916	102465574		NR_105916	ENSMUSG00000099110	Mir6951	Gm27765|mmu-mir-6951	microRNA 6951	ncRNA
934-9	chr7	59878851	59879783	+	560	intron (NR_146211, intron 37 of 171)	intron (NR_146211, intron 37 of 171)	99539	NR_028529	100217429		NR_028529		Snord64	MBII-13	small nucleolar RNA, C/D box 64	snoRNA
1657	chr1	88502675	88504330	+	560	exon (NM_008132, exon 2 of 3)	exon (NM_008132, exon 2 of 3)	6564	NM_008132	14659	Mm.5187	NM_008132	ENSMUSG00000062310	Glrp1	GRP-1	glutamine repeat protein 1	protein-coding
1180-5	chr18	3507250	3508428	+	560	promoter-TSS (NM_026505)	promoter-TSS (NM_026505)	-118	NM_026505	68010	Mm.284863	NM_026505	ENSMUSG00000024232	Bambi	2610003H06Rik	BMP and activin membrane-bound inhibitor	protein-coding
945-2	chr15	66979927	66980870	+	560	Intergenic	Intergenic	-10757	NM_008681	17988	Mm.30837	NM_008681	ENSMUSG00000005125	Ndrg1	CAP43|CMT4D|DRG1|HMSNL|NMSL|Ndr1|Ndrl|PROXY1|RTP|TDD5	N-myc downstream regulated gene 1	protein-coding
887	chr11	61222698	61223583	+	560	TTS (NR_138545)	TTS (NR_138545)	14398	NM_001331112	11670	Mm.4257	NM_007436	ENSMUSG00000019102	Aldh3a1	Ahd-4|Ahd4|Aldh|Aldh3	aldehyde dehydrogenase family 3, subfamily A1	protein-coding
860	chr1	192826976	192827834	+	559	Intergenic	RLTR18|LTR|ERVK	7808	NR_155503	320952	Mm.100944	NR_155503		A730013G03Rik	-	RIKEN cDNA A730013G03 gene	ncRNA
1147-3	chr18	75371629	75372774	+	559	intron (NM_001042660, intron 2 of 3)	intron (NM_001042660, intron 2 of 3)	4836	NM_001042660	17131	Mm.34407	NM_008543	ENSMUSG00000025880	Smad7	Madh7	SMAD family member 7	protein-coding
1029	chr10	59730508	59731535	+	559	intron (NM_001359267, intron 2 of 11)	Lx7|LINE|L1	28458	NM_144822	216001	Mm.27199	NM_144822	ENSMUSG00000020111	Micu1	C730016L05Rik|Calc|Cbara1	mitochondrial calcium uptake 1	protein-coding
1833	chr7	15948211	15950042	+	559	3' UTR (NM_153068, exon 6 of 6)	3' UTR (NM_153068, exon 6 of 6)	-3018	NM_133831	68077	Mm.277634	NM_133831	ENSMUSG00000041560	Nop53	5330430H08Rik|9430097C02Rik|AU041936|AW536441|Gltscr2|PICT-1|R74911	NOP53 ribosome biogenesis factor	protein-coding
1212	chr12	110722824	110724034	+	559	Intergenic	ERVL-int|LTR|ERVL	-14571	NM_001364272	69641	Mm.475762	NM_027149	ENSMUSG00000037957	Wdr20	2310040A13Rik|AI549910|Wdr20a	WD repeat domain 20	protein-coding
844-3	chr2	158161219	158162061	+	559	Intergenic	Intergenic	-15248	NM_009373	21817	Mm.330731	NM_009373	ENSMUSG00000037820	Tgm2	G[a]h|TG2|TGase2|tTG|tTGas	transglutaminase 2, C polypeptide	protein-coding
818	chr1	74355642	74356458	+	559	Intergenic	Intergenic	-6058	NM_001033345	241112	Mm.310460	NM_001033345	ENSMUSG00000073650	Catip	Gm216	ciliogenesis associated TTC17 interacting protein	protein-coding
990-3	chr16	96353664	96354652	+	559	Intergenic	Intergenic	-7599	NM_001177887	72058	Mm.119714	NM_028078	ENSMUSG00000000159	Igsf5	2010003D20Rik|JCAM|Jam4	immunoglobulin superfamily, member 5	protein-coding
1026	chr1	127959807	127960831	+	559	intron (NM_001285945, intron 18 of 20)	intron (NM_001285945, intron 18 of 20)	91546	NM_178690	226407	Mm.489713	NM_178690	ENSMUSG00000036104	Rab3gap1	1700003B17Rik|4732493F09Rik|AL117896|Rab3gap|p130	RAB3 GTPase activating protein subunit 1	protein-coding
1241-7	chr2	59613146	59614385	+	559	intron (NM_198294, intron 1 of 26)	intron (NM_198294, intron 1 of 26)	1723	NM_198294	66860	Mm.27917	NM_198294	ENSMUSG00000035168	Tanc1	1200003E16Rik|Tanc|mKIAA1728	tetratricopeptide repeat, ankyrin repeat and coiled-coil containing 1	protein-coding
1113-5	chr17	83513762	83514873	+	558	promoter-TSS (NM_001159529)	promoter-TSS (NM_001159529)	16	NM_001159529	20463	Mm.30072	NM_009187	ENSMUSG00000024248	Cox7a2l	COX7AR|COX7RP|EB1|SIG-81|SIG81|Silg81	cytochrome c oxidase subunit 7A2 like	protein-coding
1273-2	chr10	75032046	75033317	+	558	promoter-TSS (NM_001163534)	promoter-TSS (NM_001163534)	-95	NM_001163533	71236	Mm.414817	NM_027730	ENSMUSG00000009070	Rsph14	4933431K05Rik|Rtdr1	radial spoke head homolog 14 (Chlamydomonas)	protein-coding
910-5	chr8	94318248	94319156	+	558	Intergenic	Intergenic	-5609	NR_029552	723956		NR_029552	ENSMUSG00000065512	Mir138-2	Mirn138-2|mir-138-2	microRNA 138-2	ncRNA
865-2	chr17	64367301	64368164	+	558	Intergenic	Intergenic	-35849	NM_001025309	224938	Mm.489681	NM_144859	ENSMUSG00000024083	Pja2	AI447901|AL022700|Neurodap1|mKIAA0438	praja ring finger ubiquitin ligase 2	protein-coding
1217-7	chr9	6069943	6071158	+	558	Intergenic	Intergenic	-97936	NM_001357398	71785	Mm.390122	NM_027924	ENSMUSG00000032006	Pdgfd	1110003I09Rik	platelet-derived growth factor, D polypeptide	protein-coding
1498-4	chr16	17710078	17711574	+	557	intron (NM_001285886, intron 1 of 16)	intron (NM_001285886, intron 1 of 16)	12074	NM_001285886	94112	Mm.208970	NM_033609	ENSMUSG00000012114	Med15	A230074L19Rik|AW536074|Pcqap|mPcqap	mediator complex subunit 15	protein-coding
1194-3	chr3	9540207	9541399	+	557	intron (NM_133218, intron 2 of 8)	intron (NM_133218, intron 2 of 8)	69282	NM_133218	170753	Mm.212908	NM_133218	ENSMUSG00000040209	Zfp704	C030026M03|C030034L19Rik|Gig1|Znf704	zinc finger protein 704	protein-coding
1159-6	chr8	15059555	15060712	+	557	intron (NM_008664, intron 1 of 36)	intron (NM_008664, intron 1 of 36)	2480	NM_008664	17930	Mm.272115	NM_008664	ENSMUSG00000031461	Myom2	AW146149	myomesin 2	protein-coding
1019-5	chr4	152010839	152011856	+	557	intron (NM_001033352, intron 1 of 3)	B4|SINE|B4	2456	NM_001033352	242785	Mm.22306	NM_001033352	ENSMUSG00000073700	Klhl21	1810045K06Rik|D330008A20|mKIAA0469	kelch-like 21	protein-coding
1128-5	chr15	68442433	68443559	+	557	Intergenic	Intergenic	-101707	NR_029718	387228		NR_029718	ENSMUSG00000065437	Mir30d	Mirn30d|mir-30d|mmu-mir-30d	microRNA 30d	ncRNA
1762	chr15	78461722	78463482	+	557	intron (NM_001355601, intron 2 of 17)	(TCTA)n|Simple_repeat|Simple_repeat	6032	NM_001355601	71753	Mm.34056	NM_027902	ENSMUSG00000016942	Tmprss6	1300008A22Rik	transmembrane serine protease 6	protein-coding
1491	chr7	126376904	126378393	+	557	non-coding (NR_045537, exon 1 of 13)	non-coding (NR_045537, exon 1 of 13)	286	NM_023712	73658	Mm.11112	NM_023712	ENSMUSG00000030741	Spns1	2210013K02Rik|Spin1|Spinl	spinster homolog 1	protein-coding
1658	chr15	38727564	38729220	+	557	non-coding (NR_131206, exon 1 of 3)	non-coding (NR_131206, exon 1 of 3)	124	NR_131206	105463124	Mm.432448	NR_131206	ENSMUSG00000115620	Gm45924	Borg	predicted gene, 45924	ncRNA
1293-2	chr3	146595779	146597070	+	557	promoter-TSS (NM_009474)	promoter-TSS (NM_009474)	-725	NM_009474	22262	Mm.10865	NM_009474	ENSMUSG00000028186	Uox	AI663847	urate oxidase	protein-coding
1179-4	chr5	24613868	24615045	+	556	Intergenic	Intergenic	-12454	NM_025891	66993	Mm.436539	NM_025891	ENSMUSG00000028949	Smarcd3	1500001J14Rik|2210409C08Rik|BAF60C	SWI/SNF related, matrix associated, actin dependent regulator of chromatin, subfamily d, member 3	protein-coding
1158-7	chr6	114555122	114556278	+	556	Intergenic	IMPB_01|Satellite|Satellite	-87397	NM_028835	74244	Mm.275332	NM_028835	ENSMUSG00000030314	Atg7	1810013K23Rik|Agp7|Apg7l|Atg7l|Gm21553	autophagy related 7	protein-coding
1386	chr11	73176635	73178019	+	556	promoter-TSS (NM_001168470)	promoter-TSS (NM_001168470)	244	NM_029564	76281	Mm.371656	NM_029564	ENSMUSG00000040158	Tax1bp3	1300011C24Rik|TIP-1	Tax1 (human T cell leukemia virus type I) binding protein 3	protein-coding
1020-5	chr3	51855349	51856367	+	556	exon (NM_001004176, exon 2 of 5)	exon (NM_001004176, exon 2 of 5)	194679	NM_001310482	211666	Mm.24679	NM_174995	ENSMUSG00000074604	Mgst2	GST2|MGST-II	microsomal glutathione S-transferase 2	protein-coding
1187	chr1	192726732	192727917	+	556	exon (NM_144881, exon 5 of 12)	exon (NM_144881, exon 5 of 12)	43895	NM_144881	226861	Mm.145857	NM_144881	ENSMUSG00000037375	Hhat	2810432O22Rik|AI462858|AP-2CRE|Skn|Tg(TFAP2A-cre)1Will	hedgehog acyltransferase	protein-coding
1133-3	chr19	28679233	28680364	+	555	5' UTR (NM_001305671, exon 1 of 10)	5' UTR (NM_001305671, exon 1 of 10)	279	NM_001305671	226075	Mm.223508	NM_175459	ENSMUSG00000052942	Glis3	4833409N03Rik|E330013K21Rik	GLIS family zinc finger 3	protein-coding
969-2	chr1	155074455	155075422	+	555	intron (NR_151545, intron 3 of 6)	intron (NR_151545, intron 3 of 6)	8326	NR_151545	671336	Mm.393476	NR_151545	ENSMUSG00000096950	Gm9530	-	predicted gene 9530	ncRNA
979-4	chr18	84808686	84809663	+	555	intron (NM_001370919, intron 10 of 12)	intron (NM_001370919, intron 10 of 12)	29467	NM_001370919	100503964		NM_001370919	ENSMUSG00000117781	Gm17266	-	predicted gene, 17266	protein-coding
1011-6	chr8	120185904	120186913	+	555	Intergenic	Intergenic	-8939	NM_001033980	436062	Mm.334852	NM_001033980	ENSMUSG00000042269	Fam92b	1700120B06Rik	family with sequence similarity 92, member B	protein-coding
929	chr1	182124568	182125495	+	555	intron (NM_012058, intron 1 of 2)	CpG	294	NM_012058	27058	Mm.273196	NM_012058	ENSMUSG00000026511	Srp9	9kDa	signal recognition particle 9	protein-coding
1157-3	chr14	47774600	47775755	+	555	Intergenic	Intergenic	111421	NM_001347522	16709	Mm.3110	NM_008477	ENSMUSG00000021843	Ktn1	-	kinectin 1	protein-coding
920	chr10	111114247	111115165	+	555	Intergenic	Intergenic	-50096	NM_001003717	237542	Mm.220204	NM_175489	ENSMUSG00000020189	Osbpl8	AA536976|AA536995|C730029P18Rik|D330025H14Rik|ORP-8	oxysterol binding protein-like 8	protein-coding
1210-4	chr11	73047316	73048524	+	555	promoter-TSS (NM_025818)	promoter-TSS (NM_025818)	53	NM_025818	66874	Mm.41903	NM_025818	ENSMUSG00000020783	Ncbp3	1200014J11Rik|C130061O14Rik|C78393	nuclear cap binding subunit 3	protein-coding
907-3	chr17	70832273	70833178	+	555	Intergenic	Intergenic	14052	NM_001164077	21815	Mm.101034	NM_009372	ENSMUSG00000047407	Tgif1	AA959811|AI462167|Tgif	TGFB-induced factor homeobox 1	protein-coding
1120-5	chr18	5160809	5161927	+	555	Intergenic	Intergenic	4363	NR_153824	102637682	Mm.451914	NR_153824		Gm26682	Gm38715	predicted gene, 26682	ncRNA
1913	chr2	122125619	122127530	+	554	intron (NM_026251, intron 7 of 17)	intron (NM_026251, intron 7 of 17)	-8188	NM_145531	214585	Mm.222303	NM_145531	ENSMUSG00000033396	Spg11	6030465E24Rik|A330015I11|C530005A01Rik	SPG11, spatacsin vesicle trafficking associated	protein-coding
1144-4	chr2	125624616	125625758	+	554	promoter-TSS (NM_001081091)	promoter-TSS (NM_001081091)	-74	NM_001081091	99100	Mm.330545	NM_001081091	ENSMUSG00000068394	Cep152	AI851464|mKIAA0912	centrosomal protein 152	protein-coding
1285-2	chr15	76210479	76211762	+	554	intron (NM_011117, intron 1 of 31)	intron (NM_011117, intron 1 of 31)	-1955	NM_201386	18810	Mm.234912	NM_011117	ENSMUSG00000022565	Plec	AA591047|AU042537|EBS1|PCN|PLTN|Plec1	plectin	protein-coding
932-2	chr14	75844484	75845414	+	554	promoter-TSS (NM_009429)	promoter-TSS (NM_009429)	15	NR_045294	100043189	Mm.426329	NR_045294		Gm4285	-	predicted gene 4285	ncRNA
1138-4	chr6	140443974	140445110	+	554	intron (NM_144920, intron 3 of 30)	intron (NM_144920, intron 3 of 30)	20443	NM_144920	109135	Mm.247670	NM_144920	ENSMUSG00000030231	Plekha5	2810431N21Rik|AI428202|AK129423|AMH-Cre|Ayu21-9|Gt(pU21)9Imeg|Pepp2|Tg(AMH-cre)1Flor	pleckstrin homology domain containing, family A member 5	protein-coding
957	chr1	75236105	75237060	+	554	promoter-TSS (NM_001159885)	promoter-TSS (NM_001159885)	-120	NM_001159885	56812	Mm.489660	NM_020266	ENSMUSG00000026203	Dnajb2	2700059H22Rik|Dnajb10|Hsj1|mDj8	DnaJ heat shock protein family (Hsp40) member B2	protein-coding
1186-2	chr18	61211123	61212307	+	554	promoter-TSS (NM_007885)	promoter-TSS (NM_007885)	-119	NM_007885	13521	Mm.24803	NM_007885	ENSMUSG00000034320	Slc26a2	Dtd|ST-OB	solute carrier family 26 (sulfate transporter), member 2	protein-coding
798	chr18	75625591	75626387	+	554	intron (NM_201354, intron 2 of 11)	intron (NM_201354, intron 2 of 11)	71707	NM_201354	269037	Mm.36745	NM_201354	ENSMUSG00000052928	Ctif	Gm672	CBP80/20-dependent translation initiation factor	protein-coding
890-2	chr3	57954813	57955701	+	554	Intergenic	Intergenic	-107500	NM_019410	18645	Mm.271744	NM_019410	ENSMUSG00000027805	Pfn2	Pfn	profilin 2	protein-coding
1152-4	chr19	53891924	53893074	+	554	intron (NM_011050, intron 1 of 11)	intron (NM_011050, intron 1 of 11)	268	NM_011050	18569	Mm.1605	NM_011050	ENSMUSG00000024975	Pdcd4	D19Ucla1|Ma3|Tis	programmed cell death 4	protein-coding
1254	chr15	94346253	94347505	+	553	intron (NM_177431, intron 12 of 38)	intron (NM_177431, intron 12 of 38)	57471	NM_001164785	223838	Mm.214132	NM_177431	ENSMUSG00000022449	Adamts20	Adamst20|bt	a disintegrin-like and metallopeptidase (reprolysin type) with thrombospondin type 1 motif, 20	protein-coding
974-3	chr7	123056382	123057354	+	553	Intergenic	Intergenic	-67017	NM_144925	233833	Mm.102305	NM_144925	ENSMUSG00000052707	Tnrc6a	2010321I05Rik|3110054G10Rik|AW557223|CAGH26|D130023A07Rik|GW182|Tnrc6	trinucleotide repeat containing 6a	protein-coding
1082-2	chr4	116667946	116669026	+	553	Intergenic	Intergenic	-16812	NM_021473	58810	Mm.30085	NM_021473	ENSMUSG00000028692	Akr1a1	2610201A18Rik|Akr1a4	aldo-keto reductase family 1, member A1 (aldehyde reductase)	protein-coding
1166-6	chr2	58201582	58202746	+	553	Intergenic	Intergenic	38190	NR_045895	100042926	Mm.446515	NR_045895	ENSMUSG00000086862	Gm13546	-	predicted gene 13546	ncRNA
983-7	chr5	137610789	137611770	+	553	exon (NM_008788, exon 1 of 9)	exon (NM_008788, exon 1 of 9)	125	NM_008788	18542	Mm.262345	NM_008788	ENSMUSG00000029718	Pcolce	Astt-2|Astt2|P14|PCPE-1	procollagen C-endopeptidase enhancer protein	protein-coding
1086-8	chr4	58510282	58511366	+	553	intron (NM_010336, intron 1 of 3)	intron (NM_010336, intron 1 of 3)	-11421	NM_001290486	14745	Mm.4772	NM_010336	ENSMUSG00000038668	Lpar1	AI326300|Edg2|Gpcr26|Kdt2|lpA1|vzg-1	lysophosphatidic acid receptor 1	protein-coding
807-2	chr8	22475894	22476699	+	553	promoter-TSS (NM_011394)	promoter-TSS (NM_011394)	-404	NM_011394	20516	Mm.323901	NM_011394	ENSMUSG00000037656	Slc20a2	MolPit2|Pit-2|Pit2|Ram-1|Ram1	solute carrier family 20, member 2	protein-coding
1129-8	chr6	122602245	122603372	+	553	promoter-TSS (NM_031159)	promoter-TSS (NM_031159)	-364	NM_001134391	11810	Mm.3333	NM_031159	ENSMUSG00000040613	Apobec1	Cdar1	apolipoprotein B mRNA editing enzyme, catalytic polypeptide 1	protein-coding
826-4	chr3	104663304	104664128	+	553	Intergenic	B1_Mur4|SINE|Alu	25052	NM_009196	20501	Mm.9086	NM_009196	ENSMUSG00000032902	Slc16a1	AL022710|Mct1	solute carrier family 16 (monocarboxylic acid transporters), member 1	protein-coding
1489-2	chr14	122691111	122692598	+	553	intron (NR_153443, intron 15 of 24)	intron (NR_153443, intron 15 of 24)	157526	NM_144844	110821	Mm.23876	NM_144844	ENSMUSG00000041650	Pcca	C79630	propionyl-Coenzyme A carboxylase, alpha polypeptide	protein-coding
1203-7	chr8	70702774	70703975	+	553	5' UTR (NM_001370846, exon 1 of 4)	5' UTR (NM_001370846, exon 1 of 4)	1349	NM_001370846	637079	Mm.462671	NM_001370846	ENSMUSG00000110622	Iqcn	Gm16486	IQ motif containing N	protein-coding
933-4	chr2	94408196	94409127	+	552	intron (NR_027831, intron 1 of 1)	intron (NR_027831, intron 1 of 1)	1954	NR_027831	66457	Mm.402557	NR_027831		2810002D19Rik	-	RIKEN cDNA 2810002D19 gene	ncRNA
1269-2	chr17	9791923	9793190	+	552	Intergenic	Intergenic	-16690	NR_045433	71092	Mm.243827	NR_045433	ENSMUSG00000117264	4930452A19Rik	4933424P20Rik	RIKEN cDNA 4930452A19 gene	ncRNA
1055-3	chr15	78934474	78935527	+	552	promoter-TSS (NM_133800)	promoter-TSS (NM_133800)	67	NM_133800	97961	Mm.157216	NM_133800	ENSMUSG00000033099	Nol12	C78541|Nop25	nucleolar protein 12	protein-coding
1127-5	chr5	114764869	114765994	+	552	intron (NM_001077359, intron 4 of 18)	intron (NM_001077359, intron 4 of 18)	8060	NM_019834	26431	Mm.195632	NM_019834	ENSMUSG00000041890	Git2	1500036H07Rik|5830420E16Rik|6430510B20Rik|9630056M03Rik|B230104M05Rik|CAT2|mKIAA0148	GIT ArfGAP 2	protein-coding
992-3	chr9	96767881	96768871	+	552	intron (NR_102294, intron 1 of 2)	intron (NR_102294, intron 1 of 2)	2814	NR_102296	319707	Mm.392191	NR_102293	ENSMUSG00000101581	C430002N11Rik	-	RIKEN cDNA C430002N11 gene	ncRNA
944	chr12	88960501	88961443	+	552	intron (NM_172544, intron 2 of 19)	intron (NM_172544, intron 2 of 19)	7582	NM_172544	18191	Mm.425766	NM_172544	ENSMUSG00000066392	Nrxn3	-	neurexin III	protein-coding
972	chr1	123303215	123304185	+	552	Intergenic	B1F2|SINE|Alu	741859	NM_199021	269109	Mm.417716	NM_199021	ENSMUSG00000036815	Dpp10	6430601K09Rik|DPP X|Dprp3	dipeptidylpeptidase 10	protein-coding
1608	chr2	45419828	45421434	+	552	Intergenic	(TCTCTG)n|Simple_repeat|Simple_repeat	-275974	NR_040497	69405	Mm.396184	NR_040497	ENSMUSG00000086202	1700019E08Rik	-	RIKEN cDNA 1700019E08 gene	ncRNA
784	chr11	98474469	98475251	+	552	intron (NM_011771, intron 7 of 7)	intron (NM_011771, intron 7 of 7)	28026	NM_010346	14786	Mm.276702	NM_010346	ENSMUSG00000019312	Grb7	mKIAA4028	growth factor receptor bound protein 7	protein-coding
1172-2	chr11	60707482	60708652	+	552	intron (NM_001159404, intron 11 of 20)	intron (NM_001159404, intron 11 of 20)	8377	NM_008502	16897	Mm.285453	NM_008502	ENSMUSG00000020536	Llgl1	AI325176|Lgl1|Llglh|Mgl1	LLGL1 scribble cell polarity complex component	protein-coding
1086-9	chr4	132510043	132511127	+	552	promoter-TSS (NM_144907)	promoter-TSS (NM_144907)	-129	NM_144907	230784	Mm.23608	NM_144907	ENSMUSG00000028893	Sesn2	HI95|SEST2|Ses2	sestrin 2	protein-coding
1124-7	chrX	117312725	117313847	+	552	Intergenic	RMER17B|LTR|ERVK	298529	NM_001102665	100039319	Mm.469831	NM_001102665	ENSMUSG00000067441	H2afb1	Gm14920|Gm1539|H2A.B.3|H2A.Bbd1|H2A.Lap1	H2A histone family member B1	protein-coding
1227	chr10	81365937	81367162	+	552	promoter-TSS (NM_001014836)	promoter-TSS (NM_001014836)	-729	NM_001014836	432479	Mm.440450	NM_001014836	ENSMUSG00000020234	4930404N11Rik	2210409H10Rik|5730551K18Rik|AI854616	RIKEN cDNA 4930404N11 gene	protein-coding
1166-7	chr5	24265822	24266986	+	551	Intergenic	Intergenic	8876	NR_030454	735274		NR_030454	ENSMUSG00000106252	Mir684-1	Mirn684-1	microRNA 684-1	ncRNA
1136-4	chr18	16522485	16523619	+	551	Intergenic	(CTG)n|Simple_repeat|Simple_repeat	286194	NM_007664	12558	Mm.257437	NM_007664	ENSMUSG00000024304	Cdh2	CDHN|N-CAD|Ncad	cadherin 2	protein-coding
1115	chr10	62679693	62680806	+	551	intron (NM_001364705, intron 1 of 3)	B3|SINE|B2	-2259	NR_106074	102465987		NR_106074	ENSMUSG00000105329	Mir7215	mmu-mir-7215	microRNA 7215	ncRNA
1210-2	chr10	42930112	42931320	+	551	intron (NM_172938, intron 5 of 8)	intron (NM_172938, intron 5 of 8)	60446	NR_153349	327749	Mm.428887	NR_153349		Gm5079	C230040G06	predicted gene 5079	ncRNA
935	chr17	63432264	63433197	+	551	intron (NM_015794, intron 4 of 8)	intron (NM_015794, intron 4 of 8)	67850	NM_015794	50758	Mm.136366	NM_015794	ENSMUSG00000023965	Fbxl17	6330576B01Rik|AI452053|BB073797|C130023C01Rik|Fbx13|Fbxo13	F-box and leucine-rich repeat protein 17	protein-coding
1034-2	chr2	12114695	12115727	+	551	intron (NM_001001309, intron 28 of 29)	Charlie5|DNA|hAT-Charlie	-186035	NR_040353	338535	Mm.483275	NR_040353	ENSMUSG00000086843	E030013I19Rik	-	RIKEN cDNA E030013I19 gene	ncRNA
1184-4	chr12	116466566	116467748	+	551	Intergenic	Intergenic	-18563	NM_011215	19276	Mm.206054	NM_011215	ENSMUSG00000056553	Ptprn2	4930425H11Rik|IA2beta|PTP-NP|Phol|mKIAA0387|phogrin	protein tyrosine phosphatase, receptor type, N polypeptide 2	protein-coding
934-8	chr2	5521953	5522885	+	551	intron (NM_001290375, intron 2 of 10)	(TG)n|Simple_repeat|Simple_repeat	143029	NR_030601	100124465		NR_030601	ENSMUSG00000078031	Mir466d	Mirn466d	microRNA 466d	ncRNA
955	chr1	73824354	73825307	+	551	intron (NR_045311, intron 6 of 8)	intron (NR_045311, intron 6 of 8)	30745	NR_105769	102465179		NR_105769	ENSMUSG00000098504	Mir6351	Gm27936|mmu-mir-6351	microRNA 6351	ncRNA
1019	chr1	39854106	39855123	+	550	Intergenic	Intergenic	-7284	NR_040465	73426	Mm.396239	NR_040465	ENSMUSG00000101634	1700066B17Rik	-	RIKEN cDNA 1700066B17 gene	ncRNA
984	chr3	123508183	123509165	+	550	promoter-TSS (NR_028574)	promoter-TSS (NR_028574)	-338	NR_028574	69895	Mm.260791	NR_028574	ENSMUSG00000104960	Snhg8	1110065M07Rik|2010109N14Rik	small nucleolar RNA host gene 8	ncRNA
942-6	chr7	89337844	89338784	+	550	intron (NM_001360746, intron 2 of 14)	intron (NM_001360746, intron 2 of 14)	473	NM_028343	72759	Mm.208477	NM_028343	ENSMUSG00000039428	Tmem135	2810439K08Rik|AW319712|PMP52	transmembrane protein 135	protein-coding
1120-6	chr19	56835205	56836323	+	550	intron (NM_001002238, intron 3 of 25)	L1MD1|LINE|L1	5052	NM_001002241	83561	Mm.247541	NM_031387	ENSMUSG00000025081	Tdrd1	MTR-1	tudor domain containing 1	protein-coding
1105-4	chr14	32063302	32064405	+	550	Intergenic	(CTG)n|Simple_repeat|Simple_repeat	21433	NR_104305	105638	Mm.2519	NM_172254	ENSMUSG00000021905	Dph3	DELGIP1|DelgipP1|Desr1|KTI11|Zcsl2	diphthamine biosynthesis 3	protein-coding
1116	chr11	68336627	68337741	+	550	intron (NM_008744, intron 2 of 6)	MLT1A|LTR|ERVL-MaLR	49642	NM_008744	18208	Mm.39095	NM_008744	ENSMUSG00000020902	Ntn1	AI561871|BC019633|Netrin-1	netrin 1	protein-coding
1226-2	chr17	29077967	29079191	+	550	intron (NR_036469, intron 1 of 1)	ID_B1|SINE|B4	547	NR_036469	100504267	Mm.438550	NR_036469	ENSMUSG00000085912	Trp53cor1	Gm16197|linc-p21|lincRNA-p21	tumor protein p53 pathway corepressor 1	ncRNA
1226-6	chr7	126565827	126567051	+	550	promoter-TSS (NM_146200)	promoter-TSS (NM_146200)	-73	NM_146200	56347	Mm.22776	NM_146200	ENSMUSG00000030738	Eif3c	110kDa|3230401O13Rik|Eif3s8|NIPIL(A3)|NipilA3|Xs|Xsl	eukaryotic translation initiation factor 3, subunit C	protein-coding
1240	chr10	127612429	127613667	+	549	intron (NM_008512, intron 1 of 88)	intron (NM_008512, intron 1 of 88)	8100	NM_008512	16971	Mm.271854	NM_008512	ENSMUSG00000040249	Lrp1	A2mr|AI316852|CD91|Lrp|b2b1554Clo	low density lipoprotein receptor-related protein 1	protein-coding
1266-2	chr11	119561874	119563138	+	549	intron (NR_045099, intron 1 of 3)	intron (NR_045099, intron 1 of 3)	13876	NR_045099	100503830	Mm.428077	NR_045099	ENSMUSG00000087675	Gm11762	-	predicted gene 11762	ncRNA
1231	chr19	42014538	42015767	+	549	intron (NM_145500, intron 1 of 2)	intron (NM_145500, intron 1 of 2)	-20875	NM_020033	56642	Mm.143737	NM_020033	ENSMUSG00000025172	Ankrd2	Arpp	ankyrin repeat domain 2 (stretch responsive muscle)	protein-coding
1177-2	chr1	132619453	132620628	+	549	intron (NM_001160318, intron 9 of 26)	intron (NM_001160318, intron 9 of 26)	22818	NM_001160316	269116	Mm.326702	NM_182716	ENSMUSG00000026442	Nfasc	AA387016|D430023G06Rik|NF|mKIAA0756	neurofascin	protein-coding
842-3	chr3	105200214	105201054	+	549	Intergenic	L3|LINE|CR1	133790	NM_029228	75269	Mm.307994	NM_029228	ENSMUSG00000051788	4930564D02Rik	-	RIKEN cDNA 4930564D02 gene	protein-coding
1227-5	chr5	137020032	137021257	+	549	Intergenic	RMER19A|LTR|ERVK	-9651	NM_001039385	381677	Mm.389697	NM_001039385	ENSMUSG00000037428	Vgf	Gm1052	VGF nerve growth factor inducible	protein-coding
1029-8	chr4	139017051	139018078	+	549	intron (NM_029857, intron 8 of 16)	MER2|DNA|TcMar-Tigger	44659	NM_029857	77056	Mm.122336	NM_029857	ENSMUSG00000041143	Tmco4	4632413C14Rik|AI430825	transmembrane and coiled-coil domains 4	protein-coding
906-2	chr5	106996413	106997317	+	548	Intergenic	Intergenic	32304	NM_001271566	12545	Mm.20842	NM_009863	ENSMUSG00000029283	Cdc7	AI597260|Cdc7l1|muCdc7	cell division cycle 7 (S. cerevisiae)	protein-coding
1293-3	chr8	14542681	14543972	+	548	intron (NM_001145965, intron 3 of 14)	intron (NM_001145965, intron 3 of 14)	-345210	NM_012000	26889	Mm.254027	NM_012000	ENSMUSG00000026317	Cln8	mnd	ceroid-lipofuscinosis, neuronal 8	protein-coding
1107-2	chr1	192752507	192753612	+	548	intron (NM_144881, intron 2 of 11)	intron (NM_144881, intron 2 of 11)	18160	NM_144881	226861	Mm.145857	NM_144881	ENSMUSG00000037375	Hhat	2810432O22Rik|AI462858|AP-2CRE|Skn|Tg(TFAP2A-cre)1Will	hedgehog acyltransferase	protein-coding
1183-7	chr2	129810037	129811218	+	548	exon (NM_183262, exon 3 of 4)	exon (NM_183262, exon 3 of 4)	-9168	NR_029452	654409	Mm.305555	NR_029452		Stk35os1	4932416H05Rik	serine/threonine kinase 35, opposite strand 1	ncRNA
1472	chr7	144339899	144341369	+	548	intron (NM_001081370, intron 2 of 10)	L1MB7|LINE|L1	56240	NM_001081370	210274	Mm.483624	NM_001081370	ENSMUSG00000037541	Shank2	ProSAP1|mKIAA1022	SH3 and multiple ankyrin repeat domains 2	protein-coding
1062	chr1	86290646	86291706	+	548	Intergenic	(TATATG)n|Simple_repeat|Simple_repeat	-12045	NM_145222	227327	Mm.86467	NM_145222	ENSMUSG00000079445	B3gnt7	C330001H22Rik|beta-3GnT7	UDP-GlcNAc:betaGal beta-1,3-N-acetylglucosaminyltransferase 7	protein-coding
956-7	chr2	144443025	144443979	+	548	Intergenic	Intergenic	-15778	NR_033459	668917	Mm.152805	NR_033459	ENSMUSG00000083674	Zfp133-ps	Zfp133	zinc finger protein 133, pseudogene	pseudo
1168	chr1	82287583	82288749	+	547	exon (NM_010570, exon 1 of 2)	exon (NM_010570, exon 1 of 2)	3273	NM_010570	16367	Mm.4952	NM_010570	ENSMUSG00000055980	Irs1	G972R|IRS-1	insulin receptor substrate 1	protein-coding
1006-6	chr5	23355087	23356091	+	547	Intergenic	L1_Mus3|LINE|L1	78764	NR_040469	269630	Mm.425231	NR_040469	ENSMUSG00000073147	5031425E22Rik	-	RIKEN cDNA 5031425E22 gene	ncRNA
925-5	chr2	168540648	168541571	+	547	intron (NM_001037177, intron 3 of 6)	B4|SINE|B4	49256	NM_001291178	18019	Mm.116802	NM_010899	ENSMUSG00000027544	Nfatc2	AI607462|NF-ATc2|NF-ATp|NFAT1|NFAT1-D|Nfatp	nuclear factor of activated T cells, cytoplasmic, calcineurin dependent 2	protein-coding
1133-2	chr14	66815624	66816755	+	547	intron (NM_009955, intron 8 of 13)	intron (NM_009955, intron 8 of 13)	52411	NM_009955	12934	Mm.352648	NM_009955	ENSMUSG00000022048	Dpysl2	AI851130|Crmp2|DRP2|Musunc33|TOAD-64|Ulip2	dihydropyrimidinase-like 2	protein-coding
1146-7	chr2	157457991	157459135	+	547	exon (NM_009271, exon 5 of 15)	exon (NM_009271, exon 5 of 15)	34270	NM_001025395	20779	Mm.22845	NM_009271	ENSMUSG00000027646	Src	AW259666|pp60c-src	Rous sarcoma oncogene	protein-coding
1008-10	chrX	18322406	18323412	+	547	Intergenic	Intergenic	138488	NR_132634	75905	Mm.159617	NM_175228	ENSMUSG00000037358	Dipk2b	4930578C19Rik	divergent protein kinase domain 2B	protein-coding
979-6	chr4	120064746	120065723	+	547	intron (NM_010657, intron 3 of 8)	intron (NM_010657, intron 3 of 8)	-95972	NM_007902	13615	Mm.284855	NM_007902	ENSMUSG00000028635	Edn2	ET-2|PPET2|VIC	endothelin 2	protein-coding
900-5	chr4	62675522	62676420	+	547	intron (NM_001310706, intron 1 of 6)	intron (NM_001310706, intron 1 of 6)	1997	NM_001310706	50780	Mm.286753	NM_019492	ENSMUSG00000059810	Rgs3	4930506N09Rik|C2PA-RGS3|C2pa|PDZ-RGS3|RGS3S	regulator of G-protein signaling 3	protein-coding
959	chr16	38440175	38441132	+	547	Intergenic	MIR|SINE|MIR	-7508	NM_134102	85031	Mm.279805	NM_134102	ENSMUSG00000002847	Pla1a	AA986889|Ps-pla1|Pspla1	phospholipase A1 member A	protein-coding
1053-2	chr1	179311634	179312685	+	547	intron (NM_027188, intron 5 of 11)	intron (NM_027188, intron 5 of 11)	205882	NM_027188	69726	Mm.222338	NM_027188	ENSMUSG00000055067	Smyd3	2410008A19Rik|Zmynd1	SET and MYND domain containing 3	protein-coding
967-3	chr11	82845288	82846253	+	547	exon (NM_001164569, exon 2 of 8)	exon (NM_001164569, exon 2 of 8)	-16727	NM_026097	67338	Mm.341608	NM_026097	ENSMUSG00000020696	Rffl	1700051E09Rik|4930516L10Rik|BG080975|Carp2	ring finger and FYVE like domain containing protein	protein-coding
826-3	chr18	80200236	80201060	+	546	promoter-TSS (NM_199197)	promoter-TSS (NM_199197)	-29	NM_199197	68731	Mm.186936	NM_199197	ENSMUSG00000024570	Rbfa	1110032A13Rik|AI595940	ribosome binding factor A	protein-coding
1146-5	chr18	61356352	61357496	+	546	intron (NM_133249, intron 1 of 11)	intron (NM_133249, intron 1 of 11)	40976	NR_029879	723889		NR_029879	ENSMUSG00000105200	Mir378a	Mir378|Mirn378|mmu-mir-378|mmu-mir-378a	microRNA 378a	ncRNA
1116-4	chr2	165866730	165867844	+	546	intron (NM_001363018, intron 2 of 23)	intron (NM_001363018, intron 2 of 23)	-9114	NM_001252585	228880	Mm.227598	NM_027230	ENSMUSG00000039671	Zmynd8	1110013E22Rik|2010005I16Rik|3632413B07Rik|AI316811|AL024039|Prkcbp1|RACK7	zinc finger, MYND-type containing 8	protein-coding
1256-3	chr2	93471985	93473239	+	546	Intergenic	Intergenic	-9662	NM_001136055	12521	Mm.4261	NM_007656	ENSMUSG00000027215	Cd82	AA682076|AL023070|C33|IA4|Kai1|Tspan27	CD82 antigen	protein-coding
1144	chr1	90023476	90024618	+	546	Intergenic	Intergenic	-9381	NM_139152	208372	Mm.215164	NM_139152	ENSMUSG00000067081	Asb18	Asb-18	ankyrin repeat and SOCS box-containing 18	protein-coding
[truncated: 1,815 more rows]
